# Supplementary material for: Differential gene expression provides leads to environmentally regulated soybean seed protein content
Source: Front Plant Sci. 2023 Sep 18;14:1260393. doi: 10.3389/fpls.2023.1260393 (PMC10544915; doi:10.3389/fpls.2023.1260393)
Supplement: Supplementary file 2 [file Table_2.xlsx]

## Sheet: asparagine
			Supplementary Table 2: Bottom-up DE analysis. Included in each tab are the log2FC of all significantly DE genes. Genes highlighted in yellow are DE across all 30 datasets. Annotations for Gmax2.0, NCBI gene ID and description, TAIR10, BP and MF GO IDs and descriptions, PANTHER, and KOG are included.
			p-value < 0.01	Asparagine
			log2FC 1.5
			2019
			minimum 15/30 datasets
				Brandon										Morden										Saskatoon
				1	2	3	4	5	6	7	8	9	10	1	2	3	4	5	6	7	8	9	10	1	2	3	4	5	6	7	8	9	10	count	Gmax 2_0 Primary Protein ID (1)	NCBI Gene ID	NCBI Gene deascription April 20 2023	Top_Uniref100BLASTP	Top_Descriptive_Uniref100_BLASTP	Top_Arabidopsis_TAIR10_BLASTP	GO_BP_ID	GO_BP_Description	GO_MF_ID	GO_MF_Description	PFAM_Descriptions	Panther_Descriptions	KOG_Descriptions
		Glyma.07G257700	GLYMA_07G257700		-1.59541			-1.71421						-1.5725				-1.86196			-1.65397			-2.44502	-2.82222	-2.22195	-2.54448	-3.70701	-2.26803	-2.52121	-2.69711	-2.15232	-2.188	15	Glyma_07G257700	100807247	stem-specific protein TSJT1	UniRef100_I1KN97 Uncharacterized protein n=1 Tax=Glycine max RepID=I1KN97_SOYBN	UniRef100_Q6UK15 Al-induced protein n=1 Tax=Gossypium hirsutum RepID=Q6UK15_GOSHI	AT5G19140.1|Symbols:ATAILP1, AILP1|Aluminium induced protein with YGL and LRDR motifs|chr5:6423398-6425785 FORWARD LENGTH=234	GO:0009733 GO:0010044	response to aluminum ion; response to auxin stimulus	GO:0003674	molecular function	Aluminium induced protein ; PF12504	ASPARAGINE SYNTHETASE	NA
		Glyma.13G279200	GLYMA_13G279200	-2.01497	-3.95563	-3.06024	-3.15022	-2.92082	-3.50085	-3.13784	-3.30704	-2.74461	-2.37825		-2.94745	-2.16455	-3.81072	-2.801	-3.04467	-2.4007		-2.45139	-1.62552				-2.27816							19	Glyma_13G279200	100783727	stem-specific protein TSJT1	UniRef100_I1M3B1 Uncharacterized protein n=1 Tax=Glycine max RepID=I1M3B1_SOYBN	NA	AT4G27450.1|Symbols:|Aluminium induced protein with YGL and LRDR motifs|chr4:13727665-13728683 REVERSE LENGTH=250	GO:0001666 GO:0008150 GO:0009862 GO:0010310	biological process; regulation of hydrogen peroxide metabolic process; response to hypoxia; systemic acquired resistance, salicylic acid mediated signaling pathway	GO:0005515	protein binding	Aluminium induced protein ; PF12504	ASPARAGINE SYNTHETASE	NA
		Glyma.15G073100	GLYMA_15G073100	-3.4542	-2.37826	-3.99408	-3.17548	-3.56545	-3.35474	-2.87382	-3.92293	-2.61303	-3.17315	-2.3618	-1.76333	-2.60473	-2.53352	-2.43029	-2.33552	-1.65092	-2.4743	-1.79206	-2.31464	-3.9892	-2.82122	-3.63255	-2.8001	-2.7418	-3.75698	-1.99184	-2.7203	-3.17548	-2.82343	30	Glyma_15G073100	100798222	stem-specific protein TSJT1	UniRef100_I1MEH7 Uncharacterized protein n=1 Tax=Glycine max RepID=I1MEH7_SOYBN	UniRef100_Q3HVL7 TSJT1-like protein n=1 Tax=Solanum tuberosum RepID=Q3HVL7_SOLTU	AT4G27450.1|Symbols:|Aluminium induced protein with YGL and LRDR motifs|chr4:13727665-13728683 REVERSE LENGTH=250	GO:0001666 GO:0008150 GO:0009862 GO:0010310	biological process; regulation of hydrogen peroxide metabolic process; response to hypoxia; systemic acquired resistance, salicylic acid mediated signaling pathway	GO:0005515	protein binding	Aluminium induced protein ; PF12504	ASPARAGINE SYNTHETASE	NA
		Glyma.15G105100	GLYMA_15G105100		-3.3632	-1.80906	-2.04016	-2.26382	-2.29561	-2.33883	-2.43882	-2.05101			-2.35112		-2.5118	-1.67397	-2.02433			-1.81418			-1.81047		-2.17772							15	Glyma_15G105100	100789239	Wali7 domain-contining protein	UniRef100_K7MAQ4 Uncharacterized protein n=2 Tax=Glycine max RepID=K7MAQ4_SOYBN	UniRef100_O64438 ARG10 n=1 Tax=Vigna radiata RepID=O64438_VIGRA	AT5G19140.1|Symbols:ATAILP1, AILP1|Aluminium induced protein with YGL and LRDR motifs|chr5:6423398-6425785 FORWARD LENGTH=234	GO:0009733 GO:0010044	response to aluminum ion; response to auxin stimulus	GO:0003674	molecular function	Aluminium induced protein ; PF12504	ASPARAGINE SYNTHETASE	NA
Glyma11g27480	AS1a	Glyma.11G171400	GLYMA_11G171400	-6.70141	-5.19583	-4.90005	-4.23099	-5.49295	-6.24743	-7.10256	-5.82356	-6.71679	-6.59136	-8.78361	-7.63848	-3.60722		-3.4717	-4.65011	-5.27344	-3.96366	-6.9382	-5.65656	-5.37293										20	Glyma_11G171400	100798318	asparagine synthetase [glutamine-hydrolyzing] 2	UniRef100_I1LLM2 Asparagine synthetase n=1 Tax=Glycine max RepID=I1LLM2_SOYBN	UniRef100_I1LLM2 Asparagine synthetase n=1 Tax=Glycine max RepID=I1LLM2_SOYBN	AT3G47340.1|Symbols:ASN1, DIN6, AT-ASN1|glutamine-dependent asparagine synthase 1|chr3:17438136-17441043 REVERSE LENGTH=584	GO:0006529 GO:0009063 GO:0009416 GO:0009646 GO:0009744 GO:0009749 GO:0009750 GO:0043617	asparagine biosynthetic process; cellular amino acid catabolic process; cellular response to sucrose starvation; response to absence of light; response to fructose stimulus; response to glucose stimulus; response to light stimulus; response to sucrose stimulus	GO:0004066	asparagine synthase (glutamine-hydrolyzing) activity	Asparagine synthase	ASPARAGINE SYNTHETASE	Asparagine_synthase_(glutamine-hydrolyzing)
Glyma11g27720	AS1b	Glyma.11G170300	GLYMA_11G170300	-5.38849	-3.71468	-5.13736	-2.6524	-2.97922	-4.13456	-7.59663	-6.26978	-5.44834	-6.39449	-6.1474	-6.40217	-5.2415	-3.34519	-2.91709	-5.21189	-5.91331	-5.28741	-5.16334	-6.20529					2.79072						21	Glyma_11G170300	547877	asparagine synthetase	UniRef100_I1LLM7 Asparagine synthetase n=1 Tax=Glycine max RepID=I1LLM7_SOYBN	UniRef100_I1LLM7 Asparagine synthetase n=1 Tax=Glycine max RepID=I1LLM7_SOYBN	AT3G47340.1|Symbols:ASN1, DIN6, AT-ASN1|glutamine-dependent asparagine synthase 1|chr3:17438136-17441043 REVERSE LENGTH=584	GO:0006529 GO:0009063 GO:0009416 GO:0009646 GO:0009744 GO:0009749 GO:0009750 GO:0043617	asparagine biosynthetic process; cellular amino acid catabolic process; cellular response to sucrose starvation; response to absence of light; response to fructose stimulus; response to glucose stimulus; response to light stimulus; response to sucrose stimulus	GO:0004066	asparagine synthase (glutamine-hydrolyzing) activity	Asparagine synthase	ASPARAGINE SYNTHETASE	Asparagine_synthase_(glutamine-hydrolyzing)
Glyma18g06840	AS1c	Glyma.18G061100	GLYMA_18G061100	-2.40808	-3.87938	-2.92828	-4.59248	-2.63815	-2.71905	-3.98195	-4.48893	-3.10564	-3.24562	-2.07261	-4.82064	-2.26434	-3.9317		-2.23815	-3.30085	-3.46517	-2.74753	-2.04515										2.18632	20	Glyma_18G061100	547895	asparagine synthetase 1	UniRef100_K7MQ84 Asparagine synthetase n=1 Tax=Glycine max RepID=K7MQ84_SOYBN	UniRef100_K7MQ84 Asparagine synthetase n=1 Tax=Glycine max RepID=K7MQ84_SOYBN	AT3G47340.1|Symbols:ASN1, DIN6, AT-ASN1|glutamine-dependent asparagine synthase 1|chr3:17438136-17441043 REVERSE LENGTH=584	GO:0006529 GO:0009063 GO:0009416 GO:0009646 GO:0009744 GO:0009749 GO:0009750 GO:0043617	asparagine biosynthetic process; cellular amino acid catabolic process; cellular response to sucrose starvation; response to absence of light; response to fructose stimulus; response to glucose stimulus; response to light stimulus; response to sucrose stimulus	GO:0004066	asparagine synthase (glutamine-hydrolyzing) activity	Asparagine synthase	ASPARAGINE SYNTHETASE	Asparagine_synthase_(glutamine-hydrolyzing)
Glyma17g35650	ASPGB1b	Glyma.17G238200	GLYMA_17G238200	4.10643	7.31069	5.11586	6.51302	5.41959	5.56661	5.30192	5.41844	4.99712	3.17004	4.28255	6.75904	4.93441	6.86549	5.44941	6.09965	5.2663	5.32505	5.1275	3.8492	4.72661	7.13334	5.42255	7.18254	5.61072	6.13941	5.60132	6.05484	5.23168	4.16658	30	Glyma_17G238200	100803038	probable isoaspartyl peptidase/L-asparaginase 2	UniRef100_I1MXK5 Uncharacterized protein n=1 Tax=Glycine max RepID=I1MXK5_SOYBN	UniRef100_Q84L89 L-asparaginase n=1 Tax=Glycine max RepID=Q84L89_SOYBN	AT3G16150.1|Symbols:|N-terminal nucleophile aminohydrolases (Ntn hydrolases) superfamily protein|chr3:5471794-5473033 FORWARD LENGTH=325	GO:0006516 GO:0033345 GO:0051604	asparagine catabolic process via L-aspartate; glycoprotein catabolic process; protein maturation	GO:0004067 GO:0016787	asparaginase activity; hydrolase activity	Asparaginase	L-ASPARAGINASE	Asparaginase
Glyma04g04470	ASPGB2a	Glyma.04G042100	GLYMA_04G042100	6.34652		4.98685		6.57069	5.28009	6.22764	6.59367			5.78578				5.37948	5.36733		5.68525			6.68714	4.72549	5.07382		6.97123	6.62105	7.32924	6.29869	5.37994	5.44948	19	Glyma_04G042100	100812187	probable isoaspartyl peptidase/L-asparaginase 2-like	UniRef100_I1JTM6 Uncharacterized protein n=1 Tax=Glycine max RepID=I1JTM6_SOYBN	UniRef100_J9PVZ7 Asparaginase 2 n=1 Tax=Glycine max RepID=J9PVZ7_SOYBN	AT3G16150.1|Symbols:|N-terminal nucleophile aminohydrolases (Ntn hydrolases) superfamily protein|chr3:5471794-5473033 FORWARD LENGTH=325	GO:0006516 GO:0033345 GO:0051604	asparagine catabolic process via L-aspartate; glycoprotein catabolic process; protein maturation	GO:0004067 GO:0016787	asparaginase activity; hydrolase activity	Asparaginase	L-ASPARAGINASE	Asparaginase

## Sheet: alanine
Supplementary Table 2: Bottom-up DE analysis. Included in each tab are the log2FC of all significantly DE genes. Genes highlighted in yellow are DE across all 30 datasets. Annotations for Gmax2.0, NCBI gene ID and description, TAIR10, BP and MF GO IDs and descriptions, PANTHER, and KOG are included.
log2FC 1.5	Alanine
p<0.01
2019
minimum 15/30 datasets
	Brandon										Morden										Saskatoon
Gene	1	2	3	4	5	6	7	8	9	10	1	2	3	4	5	6	7	8	9	10	1	2	3	4	5	6	7	8	9	10	Count	Gmax 2_0 Primary Protein ID (1)	NCBI_gene_id	Top_Uniref100BLASTP	NCBI Gene deascription April 20 2023	Top_Descriptive_Uniref100_BLASTP	Top_Arabidopsis_TAIR10_BLASTP	GO_BP_ID	GO_BP_Description	GO_MF_ID	GO_MF_Description	PFAM_Descriptions	Panther_Descriptions	KOG_Descriptions
Glyma.18G116900	1.57943	1.63399				2.17953			1.92427	2.10479			1.71155			2.18604		1.89777	2.12787	2.2171	1.83606			1.80364		1.93497		1.57943		1.93135	15	Glyma_18G116900	100786630	UniRef100_K7MRF5 Uncharacterized protein n=1 Tax=Glycine max RepID=K7MRF5_SOYBN	serine--glyoxylate aminotransferase-like	UniRef100_B7U527 Serine glyoxylate aminotransferase 2 n=1 Tax=Glycine max RepID=B7U527_SOYBN	AT2G13360.2|Symbols:AGT, AGT1, SGAT|alanine:glyoxylate aminotransferase|chr2:5539417-5540902 REVERSE LENGTH=401	GO:0006833 GO:0008152 GO:0009651 GO:0009750 GO:0009853 GO:0030003 GO:0070838	cellular cation homeostasis; divalent metal ion transport; metabolic process; photorespiration; response to fructose stimulus; response to salt stress; water transport	GO:0003824 GO:0004760 GO:0008453 GO:0030170 GO:0050281	alanine-glyoxylate transaminase activity; catalytic activity; pyridoxal phosphate binding; serine-glyoxylate transaminase activity; serine-pyruvate transaminase activity	Aminotransferase class-V	AMINOTRANSFERASE CLASS V	Alanine-glyoxylate_aminotransferase_AGT1
Glyma.01G129400	-3.48042	-2.70288	-3.69075	-3.12769	-3.39039	-3.18399	-3.47391	-3.17703	-2.55313	-2.4076	-3.30187		-2.60167	-3.37961	-2.37639	-2.04433		-1.94974	-2.54538	-2.18996	-4.21966	-2.10683	-4.43995	-4.2075	-3.76118	-3.95191	-3.75163	-3.81744	-2.61886	-3.20101	28	Glyma_01G129400	100170733	UniRef100_UPI00018C6B79 PREDICTED: alanine--glyoxylate aminotransferase 2 homolog 2, mitochondrial n=1 Tax=Glycine max RepID=UPI00018C6B79	alanine--glyoxylate aminotransferase 2 homolog 2, mitochondrial	UniRef100_G7KX17 Alanine glyoxylate aminotransferase-like protein n=1 Tax=Medicago truncatula RepID=G7KX17_MEDTR	AT2G38400.1|Symbols:AGT3|alanine:glyoxylate aminotransferase 3|chr2:16083779-16085974 FORWARD LENGTH=477	NA	NA	GO:0003824 GO:0008453 GO:0008483 GO:0030170	alanine-glyoxylate transaminase activity; catalytic activity; pyridoxal phosphate binding; transaminase activity	Aminotransferase class-III	AMINOTRANSFERASE CLASS III	Alanine-glyoxylate_aminotransferase_AGT2
Glyma.03G040600		-2.91835	-2.6737	-2.47451	-2.99867		-4.46117				-2.71035		-2.313	-5.58225	-2.47236		-6.8564		-4.25995	-3.67685	-3.81075	-2.39549	-4.58103	-6.94307		-3.20343		-4.66724	-4.92899	-5.55832	20	Glyma_03G040600	100170738	UniRef100_I1JL13 Uncharacterized protein n=2 Tax=Glycine max RepID=I1JL13_SOYBN	alanine--glyoxylate aminotransferase 2 homolog 3, mitochondrial	UniRef100_G7KX17 Alanine glyoxylate aminotransferase-like protein n=1 Tax=Medicago truncatula RepID=G7KX17_MEDTR	AT3G08860.1|Symbols:PYD4|PYRIMIDINE 4|chr3:2696754-2699087 REVERSE LENGTH=481	GO:0007568 GO:0009830 GO:0043562	aging; cell wall modification involved in abscission; cellular response to nitrogen levels	GO:0003824 GO:0008453 GO:0008483 GO:0030170	alanine-glyoxylate transaminase activity; catalytic activity; pyridoxal phosphate binding; transaminase activity	Aminotransferase class-III	AMINOTRANSFERASE CLASS III	Alanine-glyoxylate_aminotransferase_AGT2
Glyma.07G247900		-2.02373	-1.77308		-1.66657		-1.62731	-1.91557			-1.66282		-1.58919	-2.15994	-1.80553	-1.65679	-1.71655		-1.54126		-1.87981	-1.77338	-1.99531	-2.48454	-2.11055	-1.77372	-1.82109	-2.13845	-1.63445	-1.75089	22	Glyma_07G247900	100781401	UniRef100_I1KMZ3 Uncharacterized protein n=1 Tax=Glycine max RepID=I1KMZ3_SOYBN	alanyl-tRNA editing protein AlaX-L-like	UniRef100_G7JLH0 Alanyl-tRNA synthetase n=1 Tax=Medicago truncatula RepID=G7JLH0_MEDTR	AT3G16565.2|Symbols:|alanine-tRNA ligases;nucleic acid binding;ligases, forming aminoacyl-tRNA and related compounds;nucleotide binding;ATP binding|chr3:5640531-5642675 REVERSE LENGTH=256	GO:0006419 GO:0043039	alanyl-tRNA aminoacylation; tRNA aminoacylation	GO:0000166 GO:0003676 GO:0004813 GO:0005524 GO:0016876	ATP binding; alanine-tRNA ligase activity; ligase activity, forming aminoacyl-tRNA and related compounds; nucleic acid binding; nucleotide binding	tRNA synthetases class II (A); Threonyl and Alanyl tRNA synthetase second additional domain	ALANYL-TRNA SYNTHETASE	NA
Glyma.11G006500			-1.75884		-1.50252	-1.81176			-2.20672	-2.02124	-1.73862		-1.64785	-1.5002					-2.79414		-1.82149	-2.3694	-2.80468	-3.02113	-2.12153	-2.30706		-2.00488	-2.96198	-2.56903	18	Glyma_11G006500	NA	UniRef100_K7LMD5 Uncharacterized protein n=1 Tax=Glycine max RepID=K7LMD5_SOYBN	NA	UniRef100_Q9LJ90 Alanine acetyl transferase-like protein n=1 Tax=Arabidopsis thaliana RepID=Q9LJ90_ARATH	AT3G22560.1|Symbols:|Acyl-CoA N-acyltransferases (NAT) superfamily protein|chr3:7998915-7999442 REVERSE LENGTH=175	GO:0008152	metabolic process	GO:0008080	N-acetyltransferase activity	NA	NA	NA
Glyma.17G026200			-2.32053	-2.62746	-3.0657	-3.46867	-2.33117	-2.19574	-3.17158		-2.09851	-2.16672	-2.36754	-3.72377	-2.82774	-3.13648		-2.33438	-3.02793	-2.20491											16	Glyma_17G026200	NA	UniRef100_K7MJM7 Uncharacterized protein n=1 Tax=Glycine max RepID=K7MJM7_SOYBN	NA	UniRef100_G7JLH0 Alanyl-tRNA synthetase n=1 Tax=Medicago truncatula RepID=G7JLH0_MEDTR	AT3G16565.2|Symbols:|alanine-tRNA ligases;nucleic acid binding;ligases, forming aminoacyl-tRNA and related compounds;nucleotide binding;ATP binding|chr3:5640531-5642675 REVERSE LENGTH=256	GO:0006419 GO:0043039	alanyl-tRNA aminoacylation; tRNA aminoacylation	GO:0000166 GO:0003676 GO:0004813 GO:0005524 GO:0016876	ATP binding; alanine-tRNA ligase activity; ligase activity, forming aminoacyl-tRNA and related compounds; nucleic acid binding; nucleotide binding	tRNA synthetases class II (A)	ALANYL-TRNA SYNTHETASE	NA
Glyma.18G021000			-2.66204	-2.69338	-3.16744	-2.98393	-2.13003	-3.2961	-2.43148	-2.31425	-2.35758	-2.17085		-3.18306	-2.89087	-2.88463	-2.16013	-1.84389	-2.79086	-1.99858			-1.71675	-2.66184	-2.13676	-2.01915	-1.83298	-2.27835	-2.02706		24	Glyma_18G021000	NA	UniRef100_K7MPG5 Uncharacterized protein n=1 Tax=Glycine max RepID=K7MPG5_SOYBN	NA	UniRef100_L9JWI9 Alanine--glyoxylate aminotransferase 2, mitochondrial (Fragment) n=1 Tax=Tupaia chinensis RepID=L9JWI9_TUPCH	NA	NA	NA	NA	NA	Aminotransferase class-III	AMINOTRANSFERASE CLASS III	Alanine-glyoxylate_aminotransferase_AGT2

## Sheet: aspartate
Supplementary Table 2: Bottom-up DE analysis. Included in each tab are the log2FC of all significantly DE genes. Genes highlighted in yellow are DE across all 30 datasets. Annotations for Gmax2.0, NCBI gene ID and description, TAIR10, BP and MF GO IDs and descriptions, PANTHER, and KOG are included.
log2FC 1.5	Aspartate																																			Some genes are also present in the asparagine data
p<0.01
2019
minimum 15/30 datasets
	Brandon										Morden										Saskatoon
Gene	1	2	3	4	5	6	7	8	9	10	1	2	3	4	5	6	7	8	9	10	1	2	3	4	5	6	7	8	9	10	Count	Gmax 2_0 Primary Protein ID (1)	NCBI_gene_id	Top_Uniref100BLASTP	NCBI Gene deascription April 20 2023	Top_Descriptive_Uniref100_BLASTP	Top_Arabidopsis_TAIR10_BLASTP	GO_BP_ID	GO_BP_Description	GO_MF_ID	GO_MF_Description	PFAM_Descriptions	Panther_Descriptions	KOG_Descriptions
Glyma.04G042100	6.34652		4.98685		6.57069	5.28009	6.22764	6.59367			5.78578				5.37948	5.36733		5.68525			6.68714	4.72549	5.07382		6.97123	6.62105	7.32924	6.29869	5.37994	5.44948	19	Glyma_04G042100	100812187	UniRef100_I1JTM6 Uncharacterized protein n=1 Tax=Glycine max RepID=I1JTM6_SOYBN	probable isoaspartyl peptidase/L-asparaginase 2-like	UniRef100_J9PVZ7 Asparaginase 2 n=1 Tax=Glycine max RepID=J9PVZ7_SOYBN	AT3G16150.1|Symbols:|N-terminal nucleophile aminohydrolases (Ntn hydrolases) superfamily protein|chr3:5471794-5473033 FORWARD LENGTH=325	GO:0006516 GO:0033345 GO:0051604	asparagine catabolic process via L-aspartate; glycoprotein catabolic process; protein maturation	GO:0004067 GO:0016787	asparaginase activity; hydrolase activity	Asparaginase	L-ASPARAGINASE	Asparaginase
Glyma.05G007600	4.52188	4.9673	4.9633	4.72848	3.55107	5.63645	4.485	4.54379	5.1877	5.78313	3.67796	3.36957	4.69898	3.87918	3.26312	4.93027	4.11428	3.72023	4.72912	5.3184	4.31119	4.02181	4.51288	4.26901	3.25099	4.86303	4.04495	4.36911	4.79602	5.43233	30	Glyma_05G007600	100782806	UniRef100_I1K1F9 Uncharacterized protein n=1 Tax=Glycine max RepID=I1K1F9_SOYBN	L-aspartate oxidase, chloroplastic	UniRef100_D2DWB4 L-aspartate oxidase n=1 Tax=Phaseolus vulgaris RepID=D2DWB4_PHAVU	AT5G14760.1|Symbols:AO|L-aspartate oxidase|chr5:4769133-4772012 FORWARD LENGTH=651	GO:0009435 GO:0055114	NAD biosynthetic process; oxidation-reduction process	GO:0008734 GO:0009055 GO:0016491	L-aspartate oxidase activity; electron carrier activity; oxidoreductase activity	Fumarate reductase flavoprotein C-term; FAD binding domain	SUCCINATE DEHYDROGENASE 2 FLAVOPROTEIN SUBUNIT	Succinate_dehydrogenase,_flavoprotein_subunit
Glyma.17G238200	4.10643	7.31069	5.11586	6.51302	5.41959	5.56661	5.30192	5.41844	4.99712	3.17004	4.28255	6.75904	4.93441	6.86549	5.44941	6.09965	5.2663	5.32505	5.1275	3.8492	4.72661	7.13334	5.42255	7.18254	5.61072	6.13941	5.60132	6.05484	5.23168	4.16658	30	Glyma_17G238200	100803038	UniRef100_I1MXK5 Uncharacterized protein n=1 Tax=Glycine max RepID=I1MXK5_SOYBN	probable isoaspartyl peptidase/L-asparaginase 2	UniRef100_Q84L89 L-asparaginase n=1 Tax=Glycine max RepID=Q84L89_SOYBN	AT3G16150.1|Symbols:|N-terminal nucleophile aminohydrolases (Ntn hydrolases) superfamily protein|chr3:5471794-5473033 FORWARD LENGTH=325	GO:0006516 GO:0033345 GO:0051604	asparagine catabolic process via L-aspartate; glycoprotein catabolic process; protein maturation	GO:0004067 GO:0016787	asparaginase activity; hydrolase activity	Asparaginase	L-ASPARAGINASE	Asparaginase
Glyma.19G159300		5.60249	3.56897	6.39825	5.26329	3.8228	3.31956	5.10388			1.96894	4.89698	2.70522	7.39302	4.97848	3.7889	2.62215	3.55217	1.87453		2.13137	4.81806	3.48252	7.46885	4.85663	4.51445	2.55676	5.1307		2.38611	25	Glyma_19G159300	100787911	UniRef100_K7MYM2 Uncharacterized protein n=1 Tax=Glycine max RepID=K7MYM2_SOYBN	protein LIFEGUARD 4	UniRef100_D7KCB1 Glutamate binding protein n=1 Tax=Arabidopsis lyrata subsp. lyrata RepID=D7KCB1_ARALL	AT1G03070.2|Symbols:|Bax inhibitor-1 family protein|chr1:730148-731379 FORWARD LENGTH=247	GO:0006457 GO:0008150 GO:0009408 GO:0009644 GO:0042542	biological process; protein folding; response to heat; response to high light intensity; response to hydrogen peroxide	GO:0016595	glutamate binding	Inhibitor of apoptosis-promoting Bax1	BAX INHIBITOR-RELATED	N-methyl-D-aspartate_receptor_glutamate-binding_subunit
Glyma.02G015800		-2.86866					-2.38532							-2.09647		-2.87728	-2.75038	-2.25125	-2.73244		-3.15278		-3.30738	-2.72363	-2.53858	-3.66388	-3.22232	-4.10037	-3.55849	-4.51133	16	Glyma_02G015800	100813552	UniRef100_I1JBJ2 Uncharacterized protein n=1 Tax=Glycine max RepID=I1JBJ2_SOYBN	fumarate hydratase 1, mitochondrial	UniRef100_B9GSD7 Fumarate hydratase 1 family protein n=1 Tax=Populus trichocarpa RepID=B9GSD7_POPTR	AT5G50950.2|Symbols:FUM2|FUMARASE 2|chr5:20729687-20733636 FORWARD LENGTH=499	GO:0006099 GO:0006106 GO:0009651 GO:0042128	fumarate metabolic process; nitrate assimilation; response to salt stress; tricarboxylic acid cycle	GO:0003824 GO:0004333 GO:0005515 GO:0016829	catalytic activity; fumarate hydratase activity; lyase activity; protein binding	Lyase; Fumarase C C-terminus	ASPARTATEAMMONIA/ARGININOSUCCINATE/ADENYLOSUCCINATE LYASE	Fumarase
Glyma.14G111800							-1.91373	-1.56448						-1.62157			-1.90175		-1.55528		-1.8307	-1.81735	-1.81764	-1.85996	-1.50889	-1.85496	-2.30747	-1.69497	-1.84673	-1.66091	15	Glyma_14G111800	100811514	UniRef100_I1M9F7 Aspartate aminotransferase n=1 Tax=Glycine max RepID=I1M9F7_SOYBN	aspartate aminotransferase P2, mitochondrial	UniRef100_I1M9F7 Aspartate aminotransferase n=1 Tax=Glycine max RepID=I1M9F7_SOYBN	AT4G31990.2|Symbols:ASP5, AAT3, ATAAT1|aspartate aminotransferase 5|chr4:15471074-15473521 REVERSE LENGTH=453	GO:0006520 GO:0009058 GO:0009409 GO:0009693 GO:0046686	biosynthetic process; cellular amino acid metabolic process; ethylene biosynthetic process; response to cadmium ion; response to cold	GO:0003824 GO:0004069 GO:0008483 GO:0016740 GO:0030170	L-aspartate:2-oxoglutarate aminotransferase activity; catalytic activity; pyridoxal phosphate binding; transaminase activity; transferase activity	Aminotransferase class I and II	ASPARTATE AMINOTRANSFERASE	Aspartate_aminotransferase/Glutamic_oxaloacetic_transaminase_AAT1/GOT2
Glyma.17G116500	-4.34713	-4.01575	-3.61996		-4.59568	-2.92569	-4.50827	-4.75612	-3.66189		-5.56788	-5.0049	-2.62255	-4.43496	-5.4398	-3.21839	-4.71701	-3.18653	-5.01603	-2.81332	-6.058	-5.35865	-5.82496	-5.85456	-8.09738	-5.5351	-6.63768	-7.52733	-5.82618	-6.6172	28	Glyma_17G116500	100792806	UniRef100_K7ML62 Uncharacterized protein n=1 Tax=Glycine max RepID=K7ML62_SOYBN	broad specificity amino-acid racemase RacX	UniRef100_B9GWD2 Aspartate-glutamate racemase family protein n=1 Tax=Populus trichocarpa RepID=B9GWD2_POPTR	AT1G15410.1|Symbols:|aspartate-glutamate racemase family|chr1:5299577-5300681 FORWARD LENGTH=330	GO:0006520 GO:0008152	cellular amino acid metabolic process; metabolic process	GO:0016855	racemase and epimerase activity, acting on amino acids and derivatives	Asp/Glu/Hydantoin racemase	NA	NA

## Sheet: glutamate
Supplementary Table 2: Bottom-up DE analysis. Included in each tab are the log2FC of all significantly DE genes. Genes highlighted in yellow are DE across all 30 datasets. Annotations for Gmax2.0, NCBI gene ID and description, TAIR10, BP and MF GO IDs and descriptions, PANTHER, and KOG are included.
log2FC 1.5	Glutamate
p<0.01
2019
minimum 15/30 datasets
	Brandon										Morden										Saskatoon
Gene	1	2	3	4	5	6	7	8	9	10	1	2	3	4	5	6	7	8	9	10	1	2	3	4	5	6	7	8	9	10	Count	Gmax 2_0 Primary Protein ID (1)	NCBI_gene_id	Top_Uniref100BLASTP	NCBI Gene deascription April 20 2023	Top_Descriptive_Uniref100_BLASTP	Top_Arabidopsis_TAIR10_BLASTP	GO_BP_ID	GO_BP_Description	GO_MF_ID	GO_MF_Description	PFAM_Descriptions	Panther_Descriptions	KOG_Descriptions
Glyma.07G226400	1.58119			2.91095		2.07817			2.17297	2.90182			1.79999	1.9342				1.60044	2.06493	2.00647	1.92183	1.92674		2.57159		2.02961		1.57353	2.10174	2.56224	17	Glyma_07G226400	100799966	UniRef100_I1KMD8 Glutamate receptor n=1 Tax=Glycine max RepID=I1KMD8_SOYBN	glutamate receptor 2.8	UniRef100_I1KMD8 Glutamate receptor n=1 Tax=Glycine max RepID=I1KMD8_SOYBN	AT2G29110.1|Symbols:ATGLR2.8, GLR2.8|glutamate receptor 2.8|chr2:12506880-12510552 REVERSE LENGTH=947	GO:0006810 GO:0006874 GO:0009416 GO:0030003	cellular calcium ion homeostasis; cellular cation homeostasis; response to light stimulus; transport	GO:0004970 GO:0005215 GO:0005217 GO:0005234	extracellular-glutamate-gated ion channel activity; intracellular ligand-gated ion channel activity; ionotropic glutamate receptor activity; transporter activity	Bacterial extracellular solute-binding proteins, family 3; Receptor family ligand binding region; Ligand-gated ion channel	IONOTROPIC GLUTAMATE RECEPTOR	Glutamate-gated_kainate-type_ion_channel_receptor_subunit_GluR5_and_related_subunits
Glyma.10G213200	1.76154	1.88174		2.79359	1.52082	1.96036		1.56528	2.09533	2.21651			1.69866	2.12812		1.72488		1.84041	2.12205	1.69209	1.55411	1.75455		2.27809					1.53998		18	Glyma_10G213200	100807842	UniRef100_I1LD36 Uncharacterized protein n=1 Tax=Glycine max RepID=I1LD36_SOYBN	mitochondrial substrate carrier family protein C	UniRef100_G7I9M5 Mitochondrial glutamate carrier n=1 Tax=Medicago truncatula RepID=G7I9M5_MEDTR	AT2G35800.1|Symbols:|mitochondrial substrate carrier family protein|chr2:15044437-15048352 FORWARD LENGTH=823	GO:0006810 GO:0055085	transmembrane transport; transport	GO:0005509	calcium ion binding	Mitochondrial carrier protein	FAMILY NOT NAMED	Mitochondrial_carrier_protein_PET8
Glyma.13G049700	3.33074	3.27373	5.74754	3.36948	4.188	3.88176	5.95177	3.52927	3.84684	3.6145	3.55015	4.33307	5.03649	4.62405	4.2012	3.42121	5.31741	3.38145	3.51888	3.27578	3.1585	2.52763	4.89711	4.47247	3.94109	3.63698	5.70535	3.56653	3.28286	3.00934	30	Glyma_13G049700	100797464	UniRef100_K7LXR0 Uncharacterized protein n=1 Tax=Glycine max RepID=K7LXR0_SOYBN	proline dehydrogenase 2, mitochondrial	UniRef100_Q6RUF9 Proline dehydrogenase n=1 Tax=Glycine max RepID=Q6RUF9_SOYBN	AT5G38710.1|Symbols:|Methylenetetrahydrofolate reductase family protein|chr5:15501340-15503899 FORWARD LENGTH=476	GO:0006537 GO:0006562 GO:0006612 GO:0006970 GO:0009407 GO:0009414 GO:0009611 GO:0009620 GO:0009695 GO:0009753 GO:0009863 GO:0009867 GO:0010363 GO:0010583 GO:0055114	glutamate biosynthetic process; jasmonic acid biosynthetic process; jasmonic acid mediated signaling pathway; oxidation-reduction process; proline catabolic process; protein targeting to membrane; regulation of plant-type hypersensitive response; response to cyclopentenone; response to fungus; response to jasmonic acid stimulus; response to osmotic stress; response to water deprivation; response …	GO:0004657	proline dehydrogenase activity	Proline dehydrogenase	PROLINE OXIDASE	Proline_oxidase
Glyma.13G093300	1.62566			1.59203	1.60241		1.71299	1.56532		2.66302											1.66233	2.78617	1.52002	2.20717	2.77749	1.80272	3.16652	2.01518	2.29673	3.73582	16	Glyma_13G093300	NA	UniRef100_K7LWX1 Uncharacterized protein n=1 Tax=Glycine max RepID=K7LWX1_SOYBN	NA	UniRef100_V4UVJ0 Glutamate receptor (Fragment) n=1 Tax=Citrus clementina RepID=V4UVJ0_9ROSI	AT2G29110.1|Symbols:ATGLR2.8, GLR2.8|glutamate receptor 2.8|chr2:12506880-12510552 REVERSE LENGTH=947	GO:0006810 GO:0006874 GO:0009416 GO:0030003	cellular calcium ion homeostasis; cellular cation homeostasis; response to light stimulus; transport	GO:0004970 GO:0005215 GO:0005217 GO:0005234	extracellular-glutamate-gated ion channel activity; intracellular ligand-gated ion channel activity; ionotropic glutamate receptor activity; transporter activity	Ligand-gated ion channel; Bacterial extracellular solute-binding proteins, family 3	IONOTROPIC GLUTAMATE RECEPTOR	NA
Glyma.13G172100			1.56188	1.50843	1.60701	1.54687	2.49904	2.22755	1.92136	2.9502				1.79065			1.64308	1.61724		2.79282				2.07684			2.02921			2.35091	15	Glyma_13G172100	100776933	UniRef100_K7M0A1 Uncharacterized protein n=1 Tax=Glycine max RepID=K7M0A1_SOYBN	glutamate receptor 2.7	UniRef100_G7IK73 Glutamate receptor 2.7 n=1 Tax=Medicago truncatula RepID=G7IK73_MEDTR	AT2G29120.1|Symbols:ATGLR2.7, GLR2.7|glutamate receptor 2.7|chr2:12511479-12515893 REVERSE LENGTH=952	GO:0006810 GO:0006874 GO:0009416 GO:0009627 GO:0034976	cellular calcium ion homeostasis; response to endoplasmic reticulum stress; response to light stimulus; systemic acquired resistance; transport	GO:0004970 GO:0005215 GO:0005217 GO:0005234	extracellular-glutamate-gated ion channel activity; intracellular ligand-gated ion channel activity; ionotropic glutamate receptor activity; transporter activity	Receptor family ligand binding region; Ligand-gated ion channel; Bacterial extracellular solute-binding proteins, family 3	IONOTROPIC GLUTAMATE RECEPTOR	Glutamate-gated_kainate-type_ion_channel_receptor_subunit_GluR5_and_related_subunits
Glyma.13G233400	2.7367	2.91125	2.29194	2.50088		2.62072	2.7651		3.75881	5.2817		1.96798	2.92165						2.51499		3.94012	5.37055	4.62332	4.85765	2.18066	4.20988	4.77799	3.5518	5.93658	5.71842	21	Glyma_13G233400	100818619	UniRef100_K7M1F5 Uncharacterized protein n=1 Tax=Glycine max RepID=K7M1F5_SOYBN	glutamate receptor 2.7	UniRef100_G7IK73 Glutamate receptor 2.7 n=1 Tax=Medicago truncatula RepID=G7IK73_MEDTR	AT2G29120.1|Symbols:ATGLR2.7, GLR2.7|glutamate receptor 2.7|chr2:12511479-12515893 REVERSE LENGTH=952	GO:0006810 GO:0006874 GO:0009416 GO:0009627 GO:0034976	cellular calcium ion homeostasis; response to endoplasmic reticulum stress; response to light stimulus; systemic acquired resistance; transport	GO:0004970 GO:0005215 GO:0005217 GO:0005234	extracellular-glutamate-gated ion channel activity; intracellular ligand-gated ion channel activity; ionotropic glutamate receptor activity; transporter activity	Receptor family ligand binding region; Bacterial extracellular solute-binding proteins, family 3; Ligand-gated ion channel	IONOTROPIC GLUTAMATE RECEPTOR	Glutamate-gated_kainate-type_ion_channel_receptor_subunit_GluR5_and_related_subunits
Glyma.15G055600	1.66455	2.89898	1.80094	2.96967	2.2493	2.56644	2.00043	2.18006	1.99962	1.85815	1.70995	2.46565	2.08237	2.92401	2.19904	2.64822	1.97351	2.35636	2.34941	1.93483	1.55496	2.13894		2.74748	1.81338	1.86675		1.98531			26	Glyma_15G055600	100776794	UniRef100_I1MDY6 Uncharacterized protein n=1 Tax=Glycine max RepID=I1MDY6_SOYBN	dicarboxylate transporter 2.1, chloroplastic	UniRef100_G7IPL2 2-oxoglutarate/malate translocator n=1 Tax=Medicago truncatula RepID=G7IPL2_MEDTR	AT5G64290.1|Symbols:DCT, DIT2.1|dicarboxylate transport 2.1|chr5:25714495-25716642 REVERSE LENGTH=563	GO:0009624 GO:0015729 GO:0015743 GO:0015813 GO:0019676 GO:0071423	L-glutamate transport; ammonia assimilation cycle; malate transmembrane transport; malate transport; oxaloacetate transport; response to nematode	GO:0005313 GO:0015131 GO:0015140 GO:0015367	L-glutamate transmembrane transporter activity; malate transmembrane transporter activity; oxaloacetate transmembrane transporter activity; oxoglutarate:malate antiporter activity	Sodium:sulfate symporter transmembrane region	SOLUTE CARRIER FAMILY 13 MEMBER	NA
Glyma.16G038300		2.40517	1.86356	2.08377	2.74215	2.7216	1.98557	2.52576	2.55228	1.98808	1.64723	2.82634	2.10039	2.68629	2.67172	2.6256	1.75609	2.28992	2.5079	2.04898		1.7577		2.33306	1.93819	1.75556		1.99923	1.79381	1.53391	26	Glyma_16G038300	547643	UniRef100_Q71EW8 Methionine synthase n=2 Tax=Papilionoideae RepID=Q71EW8_SOYBN	methionine synthase	UniRef100_Q71EW8 Methionine synthase n=2 Tax=Papilionoideae RepID=Q71EW8_SOYBN	AT5G17920.2|Symbols:ATCIMS|Cobalamin-independent synthase family protein|chr5:5935771-5939195 FORWARD LENGTH=765	GO:0008652 GO:0009086 GO:0009651 GO:0010043 GO:0046686	cellular amino acid biosynthetic process; methionine biosynthetic process; response to cadmium ion; response to salt stress; response to zinc ion	GO:0003871 GO:0005507 GO:0008270 GO:0008705	5-methyltetrahydropteroyltriglutamate-homocysteine S-methyltransferase activity; copper ion binding; methionine synthase activity; zinc ion binding	Cobalamin-independent synthase, Catalytic domain; Cobalamin-independent synthase, N-terminal domain	TEKTIN	Methionine_synthase_II_(cobalamin-independent)
Glyma.19G042900	4.33021		4.95357	4.45885	6.0869			5.78297			4.74158	4.62385	4.89539	4.29952	6.32788			5.92596	3.16931		4.59658	3.88854	5.41952	5.56534	7.1069	4.85317	3.71519	6.45515			20	Glyma_19G042900	100800978	UniRef100_I1N6L0 Uncharacterized protein n=1 Tax=Glycine max RepID=I1N6L0_SOYBN	proline dehydrogenase 2, mitochondrial	UniRef100_Q6RUF9 Proline dehydrogenase n=1 Tax=Glycine max RepID=Q6RUF9_SOYBN	AT5G38710.1|Symbols:|Methylenetetrahydrofolate reductase family protein|chr5:15501340-15503899 FORWARD LENGTH=476	GO:0006537 GO:0006562 GO:0006612 GO:0006970 GO:0009407 GO:0009414 GO:0009611 GO:0009620 GO:0009695 GO:0009753 GO:0009863 GO:0009867 GO:0010363 GO:0010583 GO:0055114	glutamate biosynthetic process; jasmonic acid biosynthetic process; jasmonic acid mediated signaling pathway; oxidation-reduction process; proline catabolic process; protein targeting to membrane; regulation of plant-type hypersensitive response; response to cyclopentenone; response to fungus; response to jasmonic acid stimulus; response to osmotic stress; response to water deprivation; response …	GO:0004657	proline dehydrogenase activity	Proline dehydrogenase	PROLINE OXIDASE	Proline_oxidase
Glyma.19G043000	3.8698	5.291	3.81605	3.58277	4.55754	3.52486	3.13757	4.11358	2.95688	2.1332	3.38877	5.00116	3.27853	3.82274	4.07686	3.62686	2.74407	3.50585	2.42269	2.44699	2.9865	3.74674	3.10202	3.4914	4.03857	2.89249	2.48354	3.39335	2.30943	2.04295	30	Glyma_19G043000	547749	UniRef100_K7MWG9 Uncharacterized protein n=2 Tax=Glycine max RepID=K7MWG9_SOYBN	proline dehydrogenase	UniRef100_Q6RUF9 Proline dehydrogenase n=1 Tax=Glycine max RepID=Q6RUF9_SOYBN	AT5G38710.1|Symbols:|Methylenetetrahydrofolate reductase family protein|chr5:15501340-15503899 FORWARD LENGTH=476	GO:0006537 GO:0006562 GO:0006612 GO:0006970 GO:0009407 GO:0009414 GO:0009611 GO:0009620 GO:0009695 GO:0009753 GO:0009863 GO:0009867 GO:0010363 GO:0010583 GO:0055114	glutamate biosynthetic process; jasmonic acid biosynthetic process; jasmonic acid mediated signaling pathway; oxidation-reduction process; proline catabolic process; protein targeting to membrane; regulation of plant-type hypersensitive response; response to cyclopentenone; response to fungus; response to jasmonic acid stimulus; response to osmotic stress; response to water deprivation; response …	GO:0004657	proline dehydrogenase activity	Proline dehydrogenase	PROLINE OXIDASE	Proline_oxidase
Glyma.19G111000			2.24867		2.43161	1.62973	2.99695	4.57365	2.55006		2.70553		1.7299		2.02442	1.97398	2.81072	4.08649	2.45769	2.29714	2.321	1.67483	1.93367	1.79114		1.50849	3.571	4.53151	2.14232	2.06981	23	Glyma_19G111000	100789509	UniRef100_C6TDZ0 Glutamate dehydrogenase n=1 Tax=Glycine max RepID=C6TDZ0_SOYBN	glutamate dehydrogenase 1-like	UniRef100_C6TDZ0 Glutamate dehydrogenase n=1 Tax=Glycine max RepID=C6TDZ0_SOYBN	AT5G18170.1|Symbols:GDH1|glutamate dehydrogenase 1|chr5:6006172-6008248 FORWARD LENGTH=411	GO:0006520 GO:0006807 GO:0009646 GO:0009651 GO:0046686 GO:0055114	cellular amino acid metabolic process; nitrogen compound metabolic process; oxidation-reduction process; response to absence of light; response to cadmium ion; response to salt stress	GO:0000166 GO:0004353 GO:0005507 GO:0005524 GO:0008270 GO:0016491 GO:0016639 GO:0050897	ATP binding; cobalt ion binding; copper ion binding; glutamate dehydrogenase [NAD(P)+] activity; nucleotide binding; oxidoreductase activity; oxidoreductase activity, acting on the CH-NH2 group of donors, NAD or NADP as acceptor; zinc ion binding	Glutamate/Leucine/Phenylalanine/Valine dehydrogenase; Glu/Leu/Phe/Val dehydrogenase, dimerisation domain	GLUTAMATE DEHYDROGENASE	Glutamate/leucine/phenylalanine/valine_dehydrogenases
Glyma.19G159300		5.60249	3.56897	6.39825	5.26329	3.8228	3.31956	5.10388			1.96894	4.89698	2.70522	7.39302	4.97848	3.7889	2.62215	3.55217	1.87453		2.13137	4.81806	3.48252	7.46885	4.85663	4.51445	2.55676	5.1307		2.38611	25	Glyma_19G159300	100787911	UniRef100_K7MYM2 Uncharacterized protein n=1 Tax=Glycine max RepID=K7MYM2_SOYBN	protein LIFEGUARD 4	UniRef100_D7KCB1 Glutamate binding protein n=1 Tax=Arabidopsis lyrata subsp. lyrata RepID=D7KCB1_ARALL	AT1G03070.2|Symbols:|Bax inhibitor-1 family protein|chr1:730148-731379 FORWARD LENGTH=247	GO:0006457 GO:0008150 GO:0009408 GO:0009644 GO:0042542	biological process; protein folding; response to heat; response to high light intensity; response to hydrogen peroxide	GO:0016595	glutamate binding	Inhibitor of apoptosis-promoting Bax1	BAX INHIBITOR-RELATED	N-methyl-D-aspartate_receptor_glutamate-binding_subunit
Glyma.20G177800	1.63429	2.08292		2.27352	1.53568	1.77221	1.5697	1.64255	1.91969	2.05225		1.58048	1.57046	1.87556		1.75295	1.57008	1.6982	1.87342	1.54043	1.65212	2.11747	1.6504	1.92609	1.56615	1.62553		1.57539	1.57748		25	Glyma_20G177800	100807197	UniRef100_I1NHD3 Uncharacterized protein n=1 Tax=Glycine max RepID=I1NHD3_SOYBN	mitochondrial substrate carrier family protein C	UniRef100_G7I9M5 Mitochondrial glutamate carrier n=1 Tax=Medicago truncatula RepID=G7I9M5_MEDTR	AT2G35800.1|Symbols:|mitochondrial substrate carrier family protein|chr2:15044437-15048352 FORWARD LENGTH=823	GO:0006810 GO:0055085	transmembrane transport; transport	GO:0005509	calcium ion binding	Mitochondrial carrier protein	FAMILY NOT NAMED	Mitochondrial_carrier_protein_PET8
Glyma.01G099800		-3.94534		-2.20948	-1.73722		-2.03272	-2.6254	-1.943		-2.49913		-1.66837	-2.68297			-2.03916	-2.28248	-2.62304	-2.18396	-1.96267	-1.91673		-2.72674	-1.63569		-1.55771	-2.51225	-2.62011		20	Glyma_01G099800	100798598	UniRef100_I1J6X7 Uncharacterized protein n=2 Tax=Glycine max RepID=I1J6X7_SOYBN	delta-1-pyrroline-5-carboxylate synthase	UniRef100_Q9AYM4 VuP5CS protein n=1 Tax=Vigna unguiculata RepID=Q9AYM4_VIGUN	AT3G55610.1|Symbols:P5CS2|delta 1-pyrroline-5-carboxylate synthase 2|chr3:20624278-20628989 REVERSE LENGTH=726	GO:0006561 GO:0009555 GO:0009737 GO:0009793 GO:0042538	embryo development ending in seed dormancy; hyperosmotic salinity response; pollen development; proline biosynthetic process; response to abscisic acid stimulus	GO:0003824 GO:0004349 GO:0004350 GO:0016491 GO:0016620	catalytic activity; glutamate-5-semialdehyde dehydrogenase activity; glutamate 5-kinase activity; oxidoreductase activity; oxidoreductase activity, acting on the aldehyde or oxo group of donors, NAD or NADP as acceptor	Aldehyde dehydrogenase family; Amino acid kinase family	GLUTAMATE SEMIALDEHYDE DEHYDROGENASE	Gamma-glutamyl_phosphate_reductase
Glyma.02G127600	-1.70948	-2.56326	-1.68453			-1.66335	-1.56046	-1.60234	-1.59653	-1.55345		-1.56444				-1.65063					-1.8581	-1.82159				-1.93671			-1.5433	-1.65152	15	Glyma_02G127600	100499724	UniRef100_I1JEP1 Uncharacterized protein n=1 Tax=Glycine max RepID=I1JEP1_SOYBN	FTCD_N superfamily protein	UniRef100_B6UFR4 Glutamate formiminotransferase n=1 Tax=Zea mays RepID=B6UFR4_MAIZE	AT2G20830.1|Symbols:|transferases;folic acid binding|chr2:8968370-8969798 REVERSE LENGTH=297	GO:0008152	metabolic process	GO:0005542 GO:0016740	folic acid binding; transferase activity	Formiminotransferase domain, N-terminal subdomain	FORMIMINOTRANSFERASE-CYCLODEAMINASE	NA
Glyma.03G069400	-3.37148	-1.96252	-2.88659	-4.16113	-4.26702	-3.48479	-3.19336	-3.60422	-2.8361	-3.46753	-2.38347		-2.35047	-3.53916	-2.77618	-2.14474	-2.70977	-2.87012	-2.50219	-2.85583	-2.74806		-2.99508	-3.59722	-3.59335	-2.75051	-2.951	-3.82548	-2.92135	-3.17896	28	Glyma_03G069400	100797414	UniRef100_I1JLN5 Uncharacterized protein n=1 Tax=Glycine max RepID=I1JLN5_SOYBN	delta-1-pyrroline-5-carboxylate synthase	UniRef100_Q9AYM4 VuP5CS protein n=1 Tax=Vigna unguiculata RepID=Q9AYM4_VIGUN	AT3G55610.1|Symbols:P5CS2|delta 1-pyrroline-5-carboxylate synthase 2|chr3:20624278-20628989 REVERSE LENGTH=726	GO:0006561 GO:0009555 GO:0009737 GO:0009793 GO:0042538	embryo development ending in seed dormancy; hyperosmotic salinity response; pollen development; proline biosynthetic process; response to abscisic acid stimulus	GO:0003824 GO:0004349 GO:0004350 GO:0016491 GO:0016620	catalytic activity; glutamate-5-semialdehyde dehydrogenase activity; glutamate 5-kinase activity; oxidoreductase activity; oxidoreductase activity, acting on the aldehyde or oxo group of donors, NAD or NADP as acceptor	Amino acid kinase family; Aldehyde dehydrogenase family	GLUTAMATE SEMIALDEHYDE DEHYDROGENASE	Gamma-glutamyl_phosphate_reductase
Glyma.04G236900	-1.75856	-2.43584	-1.67174	-2.21343				-1.78092	-1.54718			-1.92699	-1.74598	-2.14604			-1.62007		-1.83959	-1.52412	-1.51897	-1.87869		-1.97024							15	Glyma_04G236900	100815931	UniRef100_I1JYT3 Uncharacterized protein n=2 Tax=Glycine max RepID=I1JYT3_SOYBN	glutamate synthase [NADH], amyloplastic	UniRef100_Q93WZ8 NADH glutamate synthase n=1 Tax=Phaseolus vulgaris RepID=Q93WZ8_PHAVU	AT5G53460.3|Symbols:GLT1|NADH-dependent glutamate synthase 1|chr5:21700518-21709629 FORWARD LENGTH=2208	GO:0006094 GO:0006096 GO:0006537 GO:0006807 GO:0008152 GO:0009651 GO:0019676 GO:0042128 GO:0046686 GO:0048589 GO:0055114	ammonia assimilation cycle; developmental growth; gluconeogenesis; glutamate biosynthetic process; glycolysis; metabolic process; nitrate assimilation; nitrogen compound metabolic process; oxidation-reduction process; response to cadmium ion; response to salt stress	GO:0000166 GO:0003824 GO:0005506 GO:0010181 GO:0015930 GO:0016040 GO:0016491 GO:0016638 GO:0016639 GO:0045181 GO:0050660 GO:0051536	FMN binding; catalytic activity; flavin adenine dinucleotide binding; glutamate synthase (NADH) activity; glutamate synthase activity; glutamate synthase activity, NAD(P)H as acceptor; iron-sulfur cluster binding; iron ion binding; nucleotide binding; oxidoreductase activity; oxidoreductase activity, acting on the CH-NH2 group of donors; oxidoreductase activity, acting on the CH-NH2 group of dono…	Pyridine nucleotide-disulphide oxidoreductase; Glutamate synthase central domain; GXGXG motif; Conserved region in glutamate synthase; Pyridine nucleotide-disulphide oxidoreductase; Glutamine amidotransferases class-II	FAD NADPH DEHYDROGENASE/OXIDOREDUCTASE	Glutamate_synthase
Glyma.05G029200	-2.35792	-4.52584	-2.02433	-2.45453	-3.8353	-3.38797	-4.09978	-4.3106	-2.48059		-4.93972	-3.11864	-2.6209	-4.13033	-3.3484	-2.89559	-3.60966	-2.50874	-3.18016			-1.67287			-2.05611						20	Glyma_05G029200	100813821	UniRef100_I1JZR6 Uncharacterized protein n=1 Tax=Glycine max RepID=I1JZR6_SOYBN	aldehyde dehydrogenase 12A2	UniRef100_G7JPY4 Delta-1-pyrroline-5-carboxylate dehydrogenase 1 protein n=2 Tax=Medicago RepID=G7JPY4_MEDTR	AT5G62530.1|Symbols:ALDH12A1, ATP5CDH, P5CDH|aldehyde dehydrogenase 12A1|chr5:25099768-25103159 REVERSE LENGTH=556	GO:0006560 GO:0008152 GO:0009651 GO:0010133 GO:0055114 GO:0072593	metabolic process; oxidation-reduction process; proline catabolic process to glutamate; proline metabolic process; reactive oxygen species metabolic process; response to salt stress	GO:0003842 GO:0004028 GO:0008270 GO:0016491 GO:0050897	1-pyrroline-5-carboxylate dehydrogenase activity; 3-chloroallyl aldehyde dehydrogenase activity; cobalt ion binding; oxidoreductase activity; zinc ion binding	Aldehyde dehydrogenase family	ALDEHYDE DEHYDROGENASE-RELATED	Aldehyde_dehydrogenase
Glyma.05G141900		-1.77713	-1.63488		-1.81146			-1.64932	-1.56601			-1.99109	-1.50591	-1.94467	-1.87608	-1.75486					-1.58959	-1.98723		-2.08326	-1.76634	-1.7684					15	Glyma_05G141900	732572	UniRef100_I1K3G1 Uncharacterized protein n=1 Tax=Glycine max RepID=I1K3G1_SOYBN	ornithine aminotransferase	UniRef100_Q38IW9 Ornithine aminotransferase n=1 Tax=Glycine max RepID=Q38IW9_SOYBN	AT5G46180.1|Symbols:DELTA-OAT|ornithine-delta-aminotransferase|chr5:18718766-18721271 REVERSE LENGTH=475	GO:0006561 GO:0006593 GO:0006635 GO:0007031 GO:0009626 GO:0009651 GO:0009816 GO:0010260 GO:0019544 GO:0042538	arginine catabolic process to glutamate; defense response to bacterium, incompatible interaction; fatty acid beta-oxidation; hyperosmotic salinity response; organ senescence; ornithine catabolic process; peroxisome organization; plant-type hypersensitive response; proline biosynthetic process; response to salt stress	GO:0004587 GO:0008270	ornithine-oxo-acid transaminase activity; zinc ion binding	Aminotransferase class-III	AMINOTRANSFERASE CLASS III	Ornithine_aminotransferase
Glyma.08G076400	-2.59539	-3.15502	-1.73537			-1.89271	-2.3204	-2.03875	-1.56256		-4.3143	-4.21232	-2.84411	-2.47397	-2.88784	-3.96165	-4.83448	-3.76188	-3.33862	-3.36386	-4.23543	-3.8106	-2.73027		-2.57296	-3.53556	-2.97513	-2.35158	-2.63088	-2.2654	26	Glyma_08G076400	100792053	UniRef100_K7L5G4 Uncharacterized protein n=3 Tax=Glycine max RepID=K7L5G4_SOYBN	aspartate aminotransferase superfamily protein	UniRef100_G7IL92 Histidine decarboxylase n=1 Tax=Medicago truncatula RepID=G7IL92_MEDTR	AT1G43710.1|Symbols:emb1075|Pyridoxal phosphate (PLP)-dependent transferases superfamily protein|chr1:16486534-16488298 REVERSE LENGTH=482	GO:0006520 GO:0006580 GO:0009793	cellular amino acid metabolic process; embryo development ending in seed dormancy; ethanolamine metabolic process	GO:0003824 GO:0016831 GO:0030170	carboxy-lyase activity; catalytic activity; pyridoxal phosphate binding	Pyridoxal-dependent decarboxylase conserved domain	GROUP II PYRIDOXAL-5-PHOSPHATE DECARBOXYLASE	Glutamate_decarboxylase_and_related_proteins
Glyma.08G129600	-2.06444	-3.35601	-3.29163	-2.4441	-3.0405	-2.39818	-2.93641	-2.57877	-2.06266		-3.28973	-3.24489	-3.5043	-3.46666	-4.20546	-3.93793	-3.70947	-3.57389	-3.13403	-3.25981	-3.99005	-3.76061	-3.52138	-4.40707	-3.88713	-3.29713	-3.43836	-3.29002	-3.23079	-3.1308	29	Glyma_08G129600	100794163	UniRef100_K7L6C1 Uncharacterized protein n=1 Tax=Glycine max RepID=K7L6C1_SOYBN	cationic amino acid transporter 1	UniRef100_G7L9L7 High affinity cationic amino acid transporter n=1 Tax=Medicago truncatula RepID=G7L9L7_MEDTR	AT4G21120.1|Symbols:AAT1, CAT1|amino acid transporter 1|chr4:11270318-11273775 FORWARD LENGTH=594	GO:0003333 GO:0006612 GO:0006820 GO:0006862 GO:0006865 GO:0006888 GO:0006944 GO:0009407 GO:0010363 GO:0010583 GO:0015696 GO:0015802 GO:0015824 GO:0043069 GO:0043090 GO:0043091 GO:0043269 GO:0051938	ER to Golgi vesicle-mediated transport; L-arginine import; L-glutamate import; amino acid import; amino acid transmembrane transport; amino acid transport; ammonium transport; anion transport; basic amino acid transport; cellular membrane fusion; negative regulation of programmed cell death; nucleotide transport; proline transport; protein targeting to membrane; regulation of ion transport; regul…	GO:0005313 GO:0015171 GO:0015181 GO:0015189 GO:0015326	L-glutamate transmembrane transporter activity; L-lysine transmembrane transporter activity; amino acid transmembrane transporter activity; arginine transmembrane transporter activity; cationic amino acid transmembrane transporter activity	Amino acid permease	AMINO ACID TRANSPORTER	Amino_acid_transporters
Glyma.09G168900		-2.86155	-2.19538	-2.11671	-1.69285	-1.56186	-1.96833	-2.58306	-2.461		-1.81452	-1.92587	-1.80371	-2.54828	-2.00674	-1.92652	-2.1837	-2.59036	-2.69222		-2.29581	-2.95606	-2.60067	-3.28887	-2.76911	-2.78653	-2.85824	-3.62674	-3.20965	-3.31023	27	Glyma_09G168900	100796475	UniRef100_I1L3Z2 Uncharacterized protein n=1 Tax=Glycine max RepID=I1L3Z2_SOYBN	glutamate decarboxylase	UniRef100_B9I4W8 Pyridoxal-dependent decarboxylase family protein n=2 Tax=Populus trichocarpa RepID=B9I4W8_POPTR	AT3G17760.2|Symbols:GAD5|glutamate decarboxylase 5|chr3:6078893-6080838 REVERSE LENGTH=494	GO:0006536 GO:0006540 GO:0019752	carboxylic acid metabolic process; glutamate decarboxylation to succinate; glutamate metabolic process	GO:0003824 GO:0004351 GO:0005516 GO:0016831 GO:0030170	calmodulin binding; carboxy-lyase activity; catalytic activity; glutamate decarboxylase activity; pyridoxal phosphate binding	Pyridoxal-dependent decarboxylase conserved domain	GROUP II PYRIDOXAL-5-PHOSPHATE DECARBOXYLASE	Glutamate_decarboxylase/sphingosine_phosphate_lyase
Glyma.13G233000	-4.77127	-5.23676	-5.17416	-3.60589	-4.97098	-4.09986	-4.42263	-4.23358	-4.1084	-2.34123	-5.22007	-6.55737	-4.71609	-6.71019	-6.84799	-5.58921	-5.02058	-4.16346	-5.01234	-4.56156	-4.52936	-5.12594	-4.14115	-6.27588	-5.18569	-4.22687	-4.06532	-5.05216	-4.58391	-2.99082	30	Glyma_13G233000	100818078	UniRef100_UPI000233B1FB PREDICTED: glutamate receptor 2.7-like isoform X1 n=1 Tax=Glycine max RepID=UPI000233B1FB	glutamate receptor 2.7	UniRef100_G7IK74 Glutamate receptor 2.7 n=1 Tax=Medicago truncatula RepID=G7IK74_MEDTR	AT2G29120.1|Symbols:ATGLR2.7, GLR2.7|glutamate receptor 2.7|chr2:12511479-12515893 REVERSE LENGTH=952	GO:0006810 GO:0006874 GO:0009416 GO:0009627 GO:0034976	cellular calcium ion homeostasis; response to endoplasmic reticulum stress; response to light stimulus; systemic acquired resistance; transport	GO:0004970 GO:0005215 GO:0005217 GO:0005234	extracellular-glutamate-gated ion channel activity; intracellular ligand-gated ion channel activity; ionotropic glutamate receptor activity; transporter activity	Ligand-gated ion channel; Receptor family ligand binding region; Bacterial extracellular solute-binding proteins, family 3	IONOTROPIC GLUTAMATE RECEPTOR	Glutamate-gated_kainate-type_ion_channel_receptor_subunit_GluR5_and_related_subunits
Glyma.13G233300	-2.46541			-1.56182	-1.98655		-1.72124		-2.37474		-2.90268	-2.03517	-1.64654	-2.581	-2.78177	-2.18628	-1.62094		-3.06201		-1.94271				-2.16146				-2.36682		16	Glyma_13G233300	112997619	UniRef100_K7M1F3 Uncharacterized protein n=2 Tax=Glycine max RepID=K7M1F3_SOYBN	glutamate receptor 2.7-like	UniRef100_G7IK74 Glutamate receptor 2.7 n=1 Tax=Medicago truncatula RepID=G7IK74_MEDTR	AT2G29120.1|Symbols:ATGLR2.7, GLR2.7|glutamate receptor 2.7|chr2:12511479-12515893 REVERSE LENGTH=952	GO:0006810 GO:0006874 GO:0009416 GO:0009627 GO:0034976	cellular calcium ion homeostasis; response to endoplasmic reticulum stress; response to light stimulus; systemic acquired resistance; transport	GO:0004970 GO:0005215 GO:0005217 GO:0005234	extracellular-glutamate-gated ion channel activity; intracellular ligand-gated ion channel activity; ionotropic glutamate receptor activity; transporter activity	Ligand-gated ion channel; Bacterial extracellular solute-binding proteins, family 3; Receptor family ligand binding region	IONOTROPIC GLUTAMATE RECEPTOR	Glutamate-gated_kainate-type_ion_channel_receptor_subunit_GluR5_and_related_subunits
Glyma.17G067200		-4.46624		-3.98666	-4.69316	-3.28114	-3.85893	-5.515	-3.47049		-4.41259	-7.38105	-4.82664	-6.11231	-5.29361	-4.70244	-4.91804	-5.99045	-4.48444	-4.01971				-2.63134	-2.82761			-2.06817			20	Glyma_17G067200	100807817	UniRef100_K7MK91 Uncharacterized protein n=1 Tax=Glycine max RepID=K7MK91_SOYBN	glutamate receptor 2.8-like	UniRef100_V4UVJ0 Glutamate receptor (Fragment) n=1 Tax=Citrus clementina RepID=V4UVJ0_9ROSI	AT5G11210.1|Symbols:ATGLR2.5, GLR2.5|glutamate receptor 2.5|chr5:3571214-3574537 REVERSE LENGTH=829	GO:0006810 GO:0006865 GO:0006874 GO:0007186 GO:0009416 GO:0030003	G-protein coupled receptor signaling pathway; amino acid transport; cellular calcium ion homeostasis; cellular cation homeostasis; response to light stimulus; transport	GO:0004930 GO:0004970 GO:0005215 GO:0005217 GO:0005234	G-protein coupled receptor activity; extracellular-glutamate-gated ion channel activity; intracellular ligand-gated ion channel activity; ionotropic glutamate receptor activity; transporter activity	Ligand-gated ion channel; Bacterial extracellular solute-binding proteins, family 3	IONOTROPIC GLUTAMATE RECEPTOR	NA
Glyma.17G116500	-4.34713	-4.01575	-3.61996		-4.59568	-2.92569	-4.50827	-4.75612	-3.66189		-5.56788	-5.0049	-2.62255	-4.43496	-5.4398	-3.21839	-4.71701	-3.18653	-5.01603	-2.81332	-6.058	-5.35865	-5.82496	-5.85456	-8.09738	-5.5351	-6.63768	-7.52733	-5.82618	-6.6172	28	Glyma_17G116500	100792806	UniRef100_K7ML62 Uncharacterized protein n=1 Tax=Glycine max RepID=K7ML62_SOYBN	broad specificity amino-acid racemase RacX	UniRef100_B9GWD2 Aspartate-glutamate racemase family protein n=1 Tax=Populus trichocarpa RepID=B9GWD2_POPTR	AT1G15410.1|Symbols:|aspartate-glutamate racemase family|chr1:5299577-5300681 FORWARD LENGTH=330	GO:0006520 GO:0008152	cellular amino acid metabolic process; metabolic process	GO:0016855	racemase and epimerase activity, acting on amino acids and derivatives	Asp/Glu/Hydantoin racemase	NA	NA
Glyma.17G160300				-1.73209	-1.56307	-1.60306				-1.52756		-1.58144		-1.69597	-1.79384	-1.76472				-1.62969	-1.67463	-2.06873		-2.41073	-2.39578	-2.42746	-2.07424	-1.50939		-2.46943	17	Glyma_17G160300	100800925	UniRef100_K7MLX9 Uncharacterized protein n=1 Tax=Glycine max RepID=K7MLX9_SOYBN	probable amino-acid acetyltransferase NAGS1, chloroplastic	UniRef100_G7K2G8 Amino-acid acetyltransferase n=1 Tax=Medicago truncatula RepID=G7K2G8_MEDTR	AT2G22910.1|Symbols:NAGS1|N-acetyl-l-glutamate synthase 1|chr2:9749988-9752737 FORWARD LENGTH=609	GO:0006526 GO:0008652	arginine biosynthetic process; cellular amino acid biosynthetic process	GO:0004042 GO:0008080	N-acetyltransferase activity; acetyl-CoA:L-glutamate N-acetyltransferase activity	Acetyltransferase (GNAT) family; Amino acid kinase family	NA	Acetylglutamate_kinase/acetylglutamate_synthase
Glyma.18G041100		-2.18544		-1.68017		-1.59031				-1.66369	-2.06228		-1.76582	-1.77546	-1.80757	-2.26159	-1.77502	-1.96343	-1.7046	-2.01378	-2.20245	-1.83708	-1.6061	-1.72028	-1.82342	-2.11142	-1.65391	-1.906	-1.54177	-2.17024	23	Glyma_18G041100	547953	UniRef100_C6TJN5 Glutamine synthetase n=1 Tax=Glycine max RepID=C6TJN5_SOYBN	glutamine synthetase nodule isozyme	UniRef100_C6TJN5 Glutamine synthetase n=1 Tax=Glycine max RepID=C6TJN5_SOYBN	AT5G16570.1|Symbols:GLN1;4|glutamine synthetase 1;4|chr5:5421898-5424523 REVERSE LENGTH=356	GO:0006542 GO:0006807 GO:0009744 GO:0009749 GO:0009750 GO:0042128	glutamine biosynthetic process; nitrate assimilation; nitrogen compound metabolic process; response to fructose stimulus; response to glucose stimulus; response to sucrose stimulus	GO:0003824 GO:0004356	catalytic activity; glutamate-ammonia ligase activity	Glutamine synthetase, beta-Grasp domain; Glutamine synthetase, catalytic domain	GLUTAMINE SYNTHETASE	Glutamine_synthetase
Glyma.20G121400	-2.58766		-3.81959	-3.14416	-2.14667	-3.2974	-3.19395	-1.60066	-1.62611		-1.87608		-3.76326	-4.67253	-1.83815	-5.13662	-2.97789	-1.70388	-1.6855		-2.4845	-3.00625	-3.80202	-6.20537	-1.61393	-4.37096	-2.53265				23	Glyma_20G121400	100794445	UniRef100_I1NFQ3 Uncharacterized protein n=2 Tax=Glycine max RepID=I1NFQ3_SOYBN	amino-acid permease BAT1 homolog	UniRef100_B9EXZ6 Amino-acid permease BAT1 homolog n=2 Tax=Oryza sativa RepID=BAT1_ORYSJ	AT2G01170.1|Symbols:BAT1|bidirectional amino acid transporter 1|chr2:102364-104462 REVERSE LENGTH=516	GO:0003333 GO:0015812	amino acid transmembrane transport; gamma-aminobutyric acid transport	GO:0005313 GO:0015171 GO:0015180 GO:0015181 GO:0015185 GO:0015189	L-alanine transmembrane transporter activity; L-glutamate transmembrane transporter activity; L-lysine transmembrane transporter activity; amino acid transmembrane transporter activity; arginine transmembrane transporter activity; gamma-aminobutyric acid transmembrane transporter activity	Amino acid permease	AMINO ACID TRANSPORTER	Amino_acid_transporters
Glyma.U003600	-1.5062	-1.68813	-1.92128			-2.49439	-1.71638		-1.55209	-1.8025		-1.57838	-1.73705	-1.58508	-1.66749	-2.59784	-1.51559		-1.66562			-1.74661	-2.02121		-1.89379	-2.24795	-1.90224		-2.40717	-1.98032	21	Glyma_U003600	NA	UniRef100_UPI0003DE9A21 PREDICTED: amino-acid permease BAT1 homolog isoform X2 n=1 Tax=Glycine max RepID=UPI0003DE9A21	NA	NA	AT2G01170.2|Symbols:BAT1|bidirectional amino acid transporter 1|chr2:102364-104157 REVERSE LENGTH=437	GO:0003333 GO:0015812	amino acid transmembrane transport; gamma-aminobutyric acid transport	GO:0005313 GO:0015171 GO:0015180 GO:0015181 GO:0015185 GO:0015189	L-alanine transmembrane transporter activity; L-glutamate transmembrane transporter activity; L-lysine transmembrane transporter activity; amino acid transmembrane transporter activity; arginine transmembrane transporter activity; gamma-aminobutyric acid transmembrane transporter activity	Amino acid permease	AMINO ACID TRANSPORTER	NA

## Sheet: oxaloacetate
Supplementary Table 2: Bottom-up DE analysis. Included in each tab are the log2FC of all significantly DE genes. Genes highlighted in yellow are DE across all 30 datasets. Annotations for Gmax2.0, NCBI gene ID and description, TAIR10, BP and MF GO IDs and descriptions, PANTHER, and KOG are included.
p-value < 0.01	Oxaloacetate
log2FC 1.5
2019
minimum 15/30 datasets
	Brandon										Morden										Saskatoon
	1	2	3	4	5	6	7	8	9	10	1	2	3	4	5	6	7	8	9	10	1	2	3	4	5	6	7	8	9	10	Count	Gmax 2_0 Primary Protein ID (1)	NCBI_gene_id	NCBI Gene deascription April 20 2023	Top_Uniref100BLASTP	Top_Descriptive_Uniref100_BLASTP	Top_Arabidopsis_TAIR10_BLASTP	GO_BP_ID	GO_BP_Description	GO_MF_ID	GO_MF_Description	PFAM_Descriptions	Panther_Descriptions	KOG_Descriptions
Glyma.04G086300				1.73996				1.50335				1.64967	1.66116	1.99443	1.72702	1.64267		1.85745	1.85623	2.00161		1.51615		1.79844	1.56243			1.54628		2.38592	15	Glyma_04G086300	100818219	NADP-dependent malic enzyme	UniRef100_K7KIY2 Malic enzyme n=1 Tax=Glycine max RepID=K7KIY2_SOYBN	UniRef100_K7KIY2 Malic enzyme n=1 Tax=Glycine max RepID=K7KIY2_SOYBN	AT5G25880.1|Symbols:ATNADP-ME3, NADP-ME3|NADP-malic enzyme 3|chr5:9024549-9028260 FORWARD LENGTH=588	GO:0006094 GO:0006108 GO:0006499 GO:0007010 GO:0009827 GO:0009860 GO:0010498 GO:0051260 GO:0055114	N-terminal protein myristoylation; cytoskeleton organization; gluconeogenesis; malate metabolic process; oxidation-reduction process; plant-type cell wall modification; pollen tube growth; proteasomal protein catabolic process; protein homooligomerization	GO:0000166 GO:0004470 GO:0004473 GO:0016491 GO:0016616 GO:0016619 GO:0016652 GO:0046872 GO:0051287	NAD binding; malate dehydrogenase (oxaloacetate-decarboxylating) (NADP+) activity; malate dehydrogenase (oxaloacetate-decarboxylating) activity; malic enzyme activity; metal ion binding; nucleotide binding; oxidoreductase activity; oxidoreductase activity, acting on NAD(P)H, NAD(P) as acceptor; oxidoreductase activity, acting on the CH-OH group of donors, NAD or NADP as acceptor	Malic enzyme, N-terminal domain; Malic enzyme, NAD binding domain	MALIC ENZYME-RELATED	NADP+-dependent_malic_enzyme
Glyma.06G087800	1.623	1.64981	1.9379		2.25838		2.0406	2.56017	1.92511		2.74058	3.12497	2.47746	2.83475	3.06271	2.10738	2.47592	3.16733	3.25313	2.5467	1.64026	2.38403	2.15223	2.59586	2.49334	2.24119	1.59567	2.42747	1.80166	2.16074	27	Glyma_06G087800	100801564	NADP-dependent malic enzyme	UniRef100_K7KTZ6 Malic enzyme n=1 Tax=Glycine max RepID=K7KTZ6_SOYBN	UniRef100_K7KTZ6 Malic enzyme n=1 Tax=Glycine max RepID=K7KTZ6_SOYBN	AT5G25880.1|Symbols:ATNADP-ME3, NADP-ME3|NADP-malic enzyme 3|chr5:9024549-9028260 FORWARD LENGTH=588	GO:0006094 GO:0006108 GO:0006499 GO:0007010 GO:0009827 GO:0009860 GO:0010498 GO:0051260 GO:0055114	N-terminal protein myristoylation; cytoskeleton organization; gluconeogenesis; malate metabolic process; oxidation-reduction process; plant-type cell wall modification; pollen tube growth; proteasomal protein catabolic process; protein homooligomerization	GO:0000166 GO:0004470 GO:0004473 GO:0016491 GO:0016616 GO:0016619 GO:0016652 GO:0046872 GO:0051287	NAD binding; malate dehydrogenase (oxaloacetate-decarboxylating) (NADP+) activity; malate dehydrogenase (oxaloacetate-decarboxylating) activity; malic enzyme activity; metal ion binding; nucleotide binding; oxidoreductase activity; oxidoreductase activity, acting on NAD(P)H, NAD(P) as acceptor; oxidoreductase activity, acting on the CH-OH group of donors, NAD or NADP as acceptor	Malic enzyme, N-terminal domain; Malic enzyme, NAD binding domain	MALIC ENZYME-RELATED	NADP+-dependent_malic_enzyme
Glyma.08G201200	2.46755	2.00872	1.69578	2.58009	4.5916	2.92061	2.10154	3.01303	2.62429	3.88022	1.69497	2.14593		1.55446				1.82619		2.06497											15	Glyma_08G201200	100785718	NADP-dependent malic enzyme	UniRef100_I1KV22 Malic enzyme n=1 Tax=Glycine max RepID=I1KV22_SOYBN	UniRef100_I1KV22 Malic enzyme n=1 Tax=Glycine max RepID=I1KV22_SOYBN	AT1G79750.1|Symbols:ATNADP-ME4, NADP-ME4|NADP-malic enzyme 4|chr1:30007655-30011179 REVERSE LENGTH=646	GO:0006094 GO:0006108 GO:0006633 GO:0007010 GO:0009793 GO:0009845 GO:0010498 GO:0051289 GO:0055114	cytoskeleton organization; embryo development ending in seed dormancy; fatty acid biosynthetic process; gluconeogenesis; malate metabolic process; oxidation-reduction process; proteasomal protein catabolic process; protein homotetramerization; seed germination	GO:0000166 GO:0004470 GO:0004473 GO:0008270 GO:0016491 GO:0016616 GO:0016619 GO:0016652 GO:0042803 GO:0046872 GO:0050897 GO:0051287	NAD binding; cobalt ion binding; malate dehydrogenase (oxaloacetate-decarboxylating) (NADP+) activity; malate dehydrogenase (oxaloacetate-decarboxylating) activity; malic enzyme activity; metal ion binding; nucleotide binding; oxidoreductase activity; oxidoreductase activity, acting on NAD(P)H, NAD(P) as acceptor; oxidoreductase activity, acting on the CH-OH group of donors, NAD or NADP as accept…	Malic enzyme, N-terminal domain; Malic enzyme, NAD binding domain	MALIC ENZYME-RELATED	NADP+-dependent_malic_enzyme
Glyma.13G354900	2.42184	2.2646	2.21494	2.65524	2.10911	3.33059	2.49531	2.68089	3.14219	3.28506	2.35664	2.4755	2.63406	2.70187	2.04607	3.20172	2.50276	2.59142	3.03222	2.85522	2.19211	2.26831	2.07746	2.6342	1.85064	2.80165	2.30349	2.13703	2.67748	2.40028	30	Glyma_13G354900	100800844	NADP-dependent malic enzyme	UniRef100_I1M5G8 Malic enzyme n=1 Tax=Glycine max RepID=I1M5G8_SOYBN	UniRef100_I1M5G8 Malic enzyme n=1 Tax=Glycine max RepID=I1M5G8_SOYBN	AT1G79750.1|Symbols:ATNADP-ME4, NADP-ME4|NADP-malic enzyme 4|chr1:30007655-30011179 REVERSE LENGTH=646	GO:0006094 GO:0006108 GO:0006633 GO:0007010 GO:0009793 GO:0009845 GO:0010498 GO:0051289 GO:0055114	cytoskeleton organization; embryo development ending in seed dormancy; fatty acid biosynthetic process; gluconeogenesis; malate metabolic process; oxidation-reduction process; proteasomal protein catabolic process; protein homotetramerization; seed germination	GO:0000166 GO:0004470 GO:0004473 GO:0008270 GO:0016491 GO:0016616 GO:0016619 GO:0016652 GO:0042803 GO:0046872 GO:0050897 GO:0051287	NAD binding; cobalt ion binding; malate dehydrogenase (oxaloacetate-decarboxylating) (NADP+) activity; malate dehydrogenase (oxaloacetate-decarboxylating) activity; malic enzyme activity; metal ion binding; nucleotide binding; oxidoreductase activity; oxidoreductase activity, acting on NAD(P)H, NAD(P) as acceptor; oxidoreductase activity, acting on the CH-OH group of donors, NAD or NADP as accept…	Malic enzyme, N-terminal domain; Malic enzyme, NAD binding domain	MALIC ENZYME-RELATED	NADP+-dependent_malic_enzyme
Glyma.15G019300	2.44579	2.66181	2.37668	3.17516	1.92439	3.23654	2.37291	2.41394	2.89025	3.288	1.76006	2.36065	2.64597	2.60671	1.86423	2.6718	2.29975	2.16314	2.56034	2.67915	1.71827	2.14292	1.76161	2.25112		2.2028	1.74402	1.60608	2.0688	1.94751	29	Glyma_15G019300	100791514	NADP-dependent malic enzyme	UniRef100_I1MCU4 Malic enzyme n=1 Tax=Glycine max RepID=I1MCU4_SOYBN	UniRef100_I1MCU4 Malic enzyme n=1 Tax=Glycine max RepID=I1MCU4_SOYBN	AT1G79750.1|Symbols:ATNADP-ME4, NADP-ME4|NADP-malic enzyme 4|chr1:30007655-30011179 REVERSE LENGTH=646	GO:0006094 GO:0006108 GO:0006633 GO:0007010 GO:0009793 GO:0009845 GO:0010498 GO:0051289 GO:0055114	cytoskeleton organization; embryo development ending in seed dormancy; fatty acid biosynthetic process; gluconeogenesis; malate metabolic process; oxidation-reduction process; proteasomal protein catabolic process; protein homotetramerization; seed germination	GO:0000166 GO:0004470 GO:0004473 GO:0008270 GO:0016491 GO:0016616 GO:0016619 GO:0016652 GO:0042803 GO:0046872 GO:0050897 GO:0051287	NAD binding; cobalt ion binding; malate dehydrogenase (oxaloacetate-decarboxylating) (NADP+) activity; malate dehydrogenase (oxaloacetate-decarboxylating) activity; malic enzyme activity; metal ion binding; nucleotide binding; oxidoreductase activity; oxidoreductase activity, acting on NAD(P)H, NAD(P) as acceptor; oxidoreductase activity, acting on the CH-OH group of donors, NAD or NADP as accept…	Malic enzyme, N-terminal domain; Malic enzyme, NAD binding domain	MALIC ENZYME-RELATED	NADP+-dependent_malic_enzyme
Glyma.15G055600	1.66455	2.89898	1.80094	2.96967	2.2493	2.56644	2.00043	2.18006	1.99962	1.85815	1.70995	2.46565	2.08237	2.92401	2.19904	2.64822	1.97351	2.35636	2.34941	1.93483	1.55496	2.13894		2.74748	1.81338	1.86675		1.98531			26	Glyma_15G055600	100776794	dicarboxylate transporter 2.1, chloroplastic	UniRef100_I1MDY6 Uncharacterized protein n=1 Tax=Glycine max RepID=I1MDY6_SOYBN	UniRef100_G7IPL2 2-oxoglutarate/malate translocator n=1 Tax=Medicago truncatula RepID=G7IPL2_MEDTR	AT5G64290.1|Symbols:DCT, DIT2.1|dicarboxylate transport 2.1|chr5:25714495-25716642 REVERSE LENGTH=563	GO:0009624 GO:0015729 GO:0015743 GO:0015813 GO:0019676 GO:0071423	L-glutamate transport; ammonia assimilation cycle; malate transmembrane transport; malate transport; oxaloacetate transport; response to nematode	GO:0005313 GO:0015131 GO:0015140 GO:0015367	L-glutamate transmembrane transporter activity; malate transmembrane transporter activity; oxaloacetate transmembrane transporter activity; oxoglutarate:malate antiporter activity	Sodium:sulfate symporter transmembrane region	SOLUTE CARRIER FAMILY 13 MEMBER	NA
Glyma.18G261800	3.33603	3.08719	3.53533	3.07442	2.98283	2.76878	1.77836	2.10141	2.77278	1.82609	2.59402	2.87971	2.82895	1.83235	2.32852	2.84665	1.85239		2.47848		3.90635	2.38763	3.5473	2.77422	3.20859	3.66834	3.26155	2.63208	3.38474	2.32639	28	Glyma_18G261800	NA	NA	UniRef100_UPI000233F0FC PREDICTED: NADP-dependent malic enzyme-like n=1 Tax=Glycine max RepID=UPI000233F0FC	UniRef100_I1M5G8 Malic enzyme n=1 Tax=Glycine max RepID=I1M5G8_SOYBN	AT5G25880.1|Symbols:ATNADP-ME3, NADP-ME3|NADP-malic enzyme 3|chr5:9024549-9028260 FORWARD LENGTH=588	GO:0006094 GO:0006108 GO:0006499 GO:0007010 GO:0009827 GO:0009860 GO:0010498 GO:0051260 GO:0055114	N-terminal protein myristoylation; cytoskeleton organization; gluconeogenesis; malate metabolic process; oxidation-reduction process; plant-type cell wall modification; pollen tube growth; proteasomal protein catabolic process; protein homooligomerization	GO:0000166 GO:0004470 GO:0004473 GO:0016491 GO:0016616 GO:0016619 GO:0016652 GO:0046872 GO:0051287	NAD binding; malate dehydrogenase (oxaloacetate-decarboxylating) (NADP+) activity; malate dehydrogenase (oxaloacetate-decarboxylating) activity; malic enzyme activity; metal ion binding; nucleotide binding; oxidoreductase activity; oxidoreductase activity, acting on NAD(P)H, NAD(P) as acceptor; oxidoreductase activity, acting on the CH-OH group of donors, NAD or NADP as acceptor	Malic enzyme, NAD binding domain	MALIC ENZYME-RELATED	NA
Glyma.01G008500	-1.56126	-2.1458	-1.5057	-1.58886			-1.55025				-1.58457			-1.79971			-1.71518		-1.54812	-1.71123	-2.1861	-1.75966	-1.74313	-1.924	-1.66542	-1.6099	-2.17983	-1.99991		-2.27345	19	Glyma_01G008500	100796117	NADP-dependent malic enzyme	UniRef100_I1J4J6 Malic enzyme n=1 Tax=Glycine max RepID=I1J4J6_SOYBN	UniRef100_I1J4J6 Malic enzyme n=1 Tax=Glycine max RepID=I1J4J6_SOYBN	AT1G79750.1|Symbols:ATNADP-ME4, NADP-ME4|NADP-malic enzyme 4|chr1:30007655-30011179 REVERSE LENGTH=646	GO:0006094 GO:0006108 GO:0006633 GO:0007010 GO:0009793 GO:0009845 GO:0010498 GO:0051289 GO:0055114	cytoskeleton organization; embryo development ending in seed dormancy; fatty acid biosynthetic process; gluconeogenesis; malate metabolic process; oxidation-reduction process; proteasomal protein catabolic process; protein homotetramerization; seed germination	GO:0000166 GO:0004470 GO:0004473 GO:0008270 GO:0016491 GO:0016616 GO:0016619 GO:0016652 GO:0042803 GO:0046872 GO:0050897 GO:0051287	NAD binding; cobalt ion binding; malate dehydrogenase (oxaloacetate-decarboxylating) (NADP+) activity; malate dehydrogenase (oxaloacetate-decarboxylating) activity; malic enzyme activity; metal ion binding; nucleotide binding; oxidoreductase activity; oxidoreductase activity, acting on NAD(P)H, NAD(P) as acceptor; oxidoreductase activity, acting on the CH-OH group of donors, NAD or NADP as accept…	Malic enzyme, N-terminal domain; Malic enzyme, NAD binding domain	MALIC ENZYME-RELATED	NADP+-dependent_malic_enzyme
