# Supplementary material for: Differential gene expression provides leads to environmentally regulated soybean seed protein content
Source: Front Plant Sci. 2023 Sep 18;14:1260393. doi: 10.3389/fpls.2023.1260393 (PMC10544915; doi:10.3389/fpls.2023.1260393)
Supplement: Supplementary file 3 [file Table_3.xlsx]

## Sheet: Top_Down_KEGG_cumulative_genes
Supplementary Table 3: KEGG pathway mapping information for top-down and bottom-up analyses. "Genes" tabs provide input information for both analyses, which includes the KEGG ID conversion information. "Output" tabs provide the KEGG pathway Mapper Search output with all pathways (light green highlighting) and the corresponding genes from within each pathway that are DE between East- and West-grow…
Gmax_a2_ID	NCBI_gene_ID	NCBI_description	Up- or Down-regulated	KEGG_ID	KEGG_description
Glyma.17G031600	100805532	myb-related protein 308	Up	gmx:100805532	myb-related protein 308
Glyma.14G018900	100814205	uncharacterized LOC100814205	Up	gmx:100814205	uncharacterized protein LOC100814205												Biosynthesis of secondary metabolites gmx01110
Glyma.13G043000	100789571	ABC transporter G family member 1	Up	gmx:100789571	ABC transporter G family member 1 isoform X2
Glyma.03G216900	100794942	chaperone protein DnaJ	Up	gmx:100794942	chaperone protein DnaJ
Glyma.19G003400	100781709	alkane hydroxylase MAH1	Up	gmx:100781709	alkane hydroxylase MAH1
Glyma.02G250700	100807837	ultraviolet-B receptor UVR8	Up	gmx:100807837	ultraviolet-B receptor UVR8 isoform X1
Glyma.20G062700	100792715	36.4 kDa proline-rich protein	Up	gmx:100792715	36.4 kDa proline-rich protein
Glyma.15G150200	102664284	FCS-Like Zinc finger 15	Up	gmx:102664284	FCS-Like Zinc finger 15
Glyma.08G070900	100792958	ABC transporter G family member 1	Up	gmx:100792958	ABC transporter G family member 1
Glyma.03G261800	778086	MYB transcription factor MYB114	Up	gmx:778086	MYB114; MYB transcription factor MYB114
Glyma.11G223000	100778841	ultraviolet-B receptor UVR8	Up	gmx:100778841	ultraviolet-B receptor UVR8 isoform X1
Glyma.18G034600	100781488	ultraviolet-B receptor UVR8	Up	gmx:100781488	ultraviolet-B receptor UVR8 isoform X2
Glyma.04G100200	100779037	protein EXORDIUM-like 2	Up	gmx:100779037	protein EXORDIUM-like 2
Glyma.01G129700	100500546	bHLH transcription factor PIB1	Up	gmx:100500546	PIB1; bHLH transcription factor PIB1
Glyma.12G181000	100810916	GABA transporter 1-like	Up	gmx:100810916	GABA transporter 1-like isoform X1
Glyma.05G195900	100797103	uncharacterized LOC100797103	Up	gmx:100797103	uncharacterized protein LOC100797103 isoform X1
Glyma.08G003500	100785172	uncharacterized LOC100785172	Up	gmx:100785172	uncharacterized protein LOC100785172
Glyma.13G141200	100792731	probable xyloglucan endotransglucosylase/hydrolase protein 32	Up	gmx:100792731	probable xyloglucan endotransglucosylase/hydrolase protein 32
Glyma.15G005700	NA	NA	Up	NA	NA
Glyma.08G035900	102664743	probable xyloglucan endotransglucosylase/hydrolase protein 26	Up	gmx:102664743	probable xyloglucan endotransglucosylase/hydrolase protein 26
Glyma.03G170900	100799886	glycine-rich protein 5	Up	gmx:100799886	glycine-rich protein 5
Glyma.17G066100	NA	NA	Up	NA	NA
Glyma.01G124500	547988	ferritin	Up	gmx:547988	SFERH-2; ferritin-2, chloroplastic
Glyma.09G188800	100789631	glycine-rich cell wall structural protein	Up	gmx:100789631	glycine-rich cell wall structural protein
Glyma.07G125100	100817924	probable pectinesterase 53	Up	gmx:100817924	probable pectinesterase 53
Glyma.07G126900	100779092	transcription factor MYB36	Up	gmx:100779092	transcription factor MYB36
Glyma.18G225000	100037474	aureusidin synthase	Up	gmx:100037474	aureusidin synthase
Glyma.12G196200	100305571	uncharacterized LOC100305571	Up	gmx:100305571	uncharacterized protein LOC100305571
Glyma.13G062500	100775675	cyclic dof factor 2	Up	gmx:100775675	cyclic dof factor 2
Glyma.17G141700	100796327	probable pectinesterase 68	Up	gmx:100796327	probable pectinesterase 68
Glyma.14G066000	100778718	ultraviolet-B receptor UVR8	Up	gmx:100778718	ultraviolet-B receptor UVR8 isoform X2
Glyma.01G036900	548001	matrix metalloproteinase MMP2	Up	gmx:548001	MMP2; matrix metalloproteinase MMP2 precursor
Glyma.13G331600	100776947	3-ketoacyl-CoA synthase 12	Up	gmx:100776947	3-ketoacyl-CoA synthase 12
Glyma.11G208600	100790042	CASP-like protein 10-like	Up	gmx:100790042	CASP-like protein 2A2
Glyma.07G126600	100777649	inositol oxygenase 2	Up	gmx:100777649	inositol oxygenase 2 isoform X1
Glyma.08G335000	100803533	probable sugar phosphate/phosphate translocator At3g11320	Up	gmx:100803533	probable sugar phosphate/phosphate translocator At3g11320
Glyma.04G137600	100818762	two-component response regulator ARR9-like	Up	gmx:100818762	two-component response regulator ARR9-like
Glyma.08G033100	100800892	protein IQ-DOMAIN 27	Up	gmx:100800892	IQD27; protein IQ-DOMAIN 14
Glyma.13G136300	100797466	protein REVEILLE 8	Up	gmx:100797466	protein REVEILLE 8 isoform X2
Glyma.11G074900	100795117	probable salt tolerance-like protein At1g78600-like	Up	gmx:100795117	uncharacterized protein LOC100795117
Glyma.10G048500	778050	MYB transcription factor MYB118	Up	gmx:778050	MYB118; MYB transcription factor MYB118
Glyma.02G063400	100800919	salicylic acid-binding protein 2	Up	gmx:100800919	salicylic acid-binding protein 2 isoform X1
Glyma.06G061200	100527928	ENODL1-like domain-containing protein	Up	gmx:100527928	ENODL1-like domain-containing protein precursor
Glyma.19G260900	780540	LHY1/CCA1-like protein	Up	gmx:780540	LCL3; protein LHY
Glyma.11G158200	NA	NA	Up	NA	NA
Glyma.03G132700	547822	glucan endo-1,3-beta-glucosidase	Up	gmx:547822	glucan endo-1,3-beta-glucosidase precursor
Glyma.16G179100	100785541	beta-carotene hydroxylase BCH2	Up	gmx:100785541	BCH2; beta-carotene hydroxylase BCH2
Glyma.05G003000	100779590	alkane hydroxylase MAH1	Up	gmx:100779590	alkane hydroxylase MAH1
Glyma.01G022300	100785731	7-deoxyloganetic acid glucosyltransferase	Up	gmx:100785731	7-deoxyloganetic acid glucosyltransferase
Glyma.13G350300	100784433	protein HOTHEAD	Up	gmx:100784433	protein HOTHEAD												Biosynthesis of secondary metabolites gmx01100
Glyma.05G160700	100793239	uncharacterized LOC100793239	Up	gmx:100793239	uncharacterized protein LOC100793239
Glyma.05G055300	NA	NA	Up	NA	NA
Glyma.17G230000	100812648	homeobox protein ATH1	Up	gmx:100812648	homeobox protein ATH1
Glyma.05G226100	100793235	protein IQ-DOMAIN 16	Up	gmx:100793235	IQD16; protein IQ-DOMAIN 14
Glyma.09G061300	100775204	protein MANNAN SYNTHESIS-RELATED	Up	gmx:100775204	protein MANNAN SYNTHESIS-RELATED
Glyma.07G201000	100793283	uncharacterized LOC100793283	Up	gmx:100793283	uncharacterized protein LOC100793283
Glyma.14G067400	100789759	aspartic proteinase PCS1	Up	gmx:100789759	aspartic proteinase PCS1
Glyma.12G011400	100808619	cytokinin dehydrogenase 6	Up	gmx:100808619	cytokinin dehydrogenase 6
Glyma.18G106400	100810866	uncharacterized LOC100810866	Up	gmx:100810866	uncharacterized protein LOC100810866 precursor
Glyma.05G140700	106798904	uncharacterized LOC106798904	Up	gmx:106798904	uncharacterized protein LOC106798904
Glyma.04G133400	100785636	protein LNK3	Up	gmx:100785636	protein LNK3
Glyma.08G336300	100801421	uncharacterized LOC100801421	Up	gmx:100801421	uncharacterized protein LOC100801421
Glyma.03G104800	100779702	hydroquinone glucosyltransferase	Up	gmx:100779702	hydroquinone glucosyltransferase
Glyma.05G007600	100782806	L-aspartate oxidase, chloroplastic	Up	gmx:100782806	L-aspartate oxidase, chloroplastic
Glyma.12G234500	100776187	sugar efflux transporter SWEET29	Up	gmx:100776187	SWEET29; sugar efflux transporter SWEET29
Glyma.06G022900	100793604	GDSL esterase/lipase EXL3-like	Up	gmx:100793604	GDSL esterase/lipase EXL3-like
Glyma.20G163500	NA	NA	Up	NA	NA
Glyma.13G191900	100810608	protein LNK3	Up	gmx:100810608	protein LNK3
Glyma.13G306300	100500322	uncharacterized LOC100500322	Up	gmx:100500322	uncharacterized protein LOC100500322
Glyma.01G239800	102667954	protein FANTASTIC FOUR 3	Up	gmx:102667954	protein FANTASTIC FOUR 3
Glyma.08G314700	100793638	fatty acid desaturase 4, chloroplastic	Up	gmx:100793638	fatty acid desaturase 4, chloroplastic
Glyma.09G170500	547765	zinc finger homeodomain protein SZF-HD1	Up	gmx:547765	zinc finger homeodomain protein SZF-HD1
Glyma.03G139500	100812148	uncharacterized LOC100812148	Up	gmx:100812148	uncharacterized protein LOC100812148
Glyma.07G218900	100787284	probable sulfate transporter 3.3	Up	gmx:100787284	probable sulfate transporter 3.3 isoform X1
Glyma.18G295700	100306145	uncharacterized LOC100306145	Up	gmx:100306145	uncharacterized protein LOC100306145
Glyma.08G319200	100801057	glycine-rich protein 5	Up	gmx:100801057	glycine-rich protein 5
Glyma.01G209500	100816190	probable pectinesterase 68	Up	gmx:100816190	probable pectinesterase 68
Glyma.17G211900	100789623	myosin-4	Up	gmx:100789623	myosin-4
Glyma.18G071400	100813747	uncharacterized LOC100813747	Up	gmx:100813747	uncharacterized protein LOC100813747
Glyma.08G254600	113002402	protein SOB FIVE-LIKE 4	Up	gmx:113002402	protein SOB FIVE-LIKE 4
Glyma.12G120200	100780270	UDP-glycosyltransferase 79B30-like	Up	gmx:100780270	UDP-glycosyltransferase 79B30-like
Glyma.13G349300	100783003	beta-fructofuranosidase, cell wall isozyme	Up	gmx:100783003	beta-fructofuranosidase, cell wall isozyme
Glyma.14G029800	100527735	uncharacterized LOC100527735	Up	gmx:100527735	cytochrome b561 domain-containing protein At4g18260
Glyma.08G243100	100789065	uncharacterized LOC100789065	Up	gmx:100789065	uncharacterized protein LOC100789065
Glyma.19G082000	100810041	uncharacterized LOC100810041	Up	gmx:100810041	uncharacterized protein LOC100810041 isoform X1
Glyma.18G205800	547824	ferritin light chain	Up	gmx:547824	H-1; ferritin-1, chloroplastic precursor
Glyma.04G060600	100305551	early nodulin-like protein	Up	gmx:100305551	early nodulin-like protein precursor
Glyma.19G032100	NA	NA	Up	NA	NA
Glyma.19G147700	100305935	uncharacterized LOC100305935	Up	gmx:100305935	uncharacterized protein LOC100305935
Glyma.04G133500	NA	NA	Up	NA	NA
Glyma.13G306600	100527137	cyclin-U1-1-like	Up	gmx:100527137	cyclin-U1-1-like
Glyma.04G003200	100306103	aquaporin PIP2-1	Up	gmx:100306103	PIP2-1; aquaporin PIP2-1
Glyma.19G127200	547919	G2/mitotic-specific cyclin S13-7	Up	gmx:547919	CYCB1;2; G2/mitotic-specific cyclin S13-7
Glyma.09G028400	100809450	patellin-4	Up	gmx:100809450	patellin-4
Glyma.10G229800	100790712	ABC transporter G family member 8	Up	gmx:100790712	ABC transporter G family member 8
Glyma.18G286700	100780065	aquaporin TIP1-2	Up	gmx:100780065	aquaporin TIP1-3
Glyma.03G062800	100778097	uncharacterized LOC100778097	Up	gmx:100803038
Glyma.17G238200	100803038	probable isoaspartyl peptidase/L-asparaginase 2	Up	gmx:100788704	probable isoaspartyl peptidase/L-asparaginase 2
Glyma.07G009900	100788704	protein HOTHEAD	Up	gmx:100776827	protein HOTHEAD
Glyma.09G256100	100776827	probable polygalacturonase	Up	gmx:100305787	probable polygalacturonase
Glyma.17G223400	100305787	uncharacterized LOC100305787	Up	gmx:100305686	uncharacterized protein LOC100305787 precursor
Glyma.07G141500	100305686	uncharacterized LOC100305686	Up	gmx:102667703	uncharacterized protein LOC100305686 precursor
Glyma.08G221600	102667703	B-box zinc finger protein 32	Up		B-box zinc finger protein 32
Glyma.18G030700	732658	endoglucanase 1	Up	gmx:732658	endoglucanase 1
Glyma.16G181900	100809612	kinesin-like protein KIN-10C	Up	gmx:100809612	kinesin-like protein KIN-10C isoform X1
Glyma.19G213500	102668305	chaperone protein DnaJ	Up	gmx:102668305	chaperone protein DnaJ isoform X1
Glyma.08G279600	100819733	uncharacterized protein At4g38062	Up	gmx:100819733	uncharacterized protein At4g38062
Glyma.01G229600	100784841	cell division cycle 20.2, cofactor of APC complex	Up	gmx:100784841	cell division cycle 20.2, cofactor of APC complex
Glyma.02G143200	100782374	histone H2A variant 1	Up	gmx:100782374	histone H2A variant 1
Glyma.03G217700	100798655	uncharacterized LOC100798655	Up	gmx:100798655	uncharacterized protein LOC100798655
Glyma.05G215500	100814709	high mobility group B protein 6	Up	gmx:100814709	high mobility group B protein 6
Glyma.09G010700	100790349	tonoplast dicarboxylate transporter	Up	gmx:100790349	tonoplast dicarboxylate transporter
Glyma.19G027400	100818397	uncharacterized LOC100818397	Up	gmx:100818397	uncharacterized protein LOC100818397
Glyma.20G217600	NA	NA	Up	NA	NA
Glyma.10G241700	100818350	3-ketoacyl-CoA synthase 6	Up	gmx:100818350	3-ketoacyl-CoA synthase 6
Glyma.15G149600	100776073	late embryogenesis abundant protein Lea5	Up	gmx:100776073	late embryogenesis abundant protein Lea5
Glyma.19G043000	547749	proline dehydrogenase	Up	gmx:547749	PDH; proline dehydrogenase
Glyma.20G232700	100786341	root phototropism protein 3	Up	gmx:100786341	root phototropism protein 3
Glyma.16G151200	100816016	syntaxin-related protein KNOLLE	Up	gmx:100816016	syntaxin-related protein KNOLLE
Glyma.12G021800	100305664	ubiquitin-conjugating enzyme E2	Up	gmx:100305664	ubiquitin-conjugating enzyme E2
Glyma.08G021700	100783033	high mobility group B protein 6	Up	gmx:100783033	high mobility group B protein 6
Glyma.19G167200	100808067	uncharacterized LOC100808067	Up	gmx:100808067	uncharacterized protein LOC100808067
Glyma.13G243800	NA	NA	Up	NA	NA
Glyma.08G329600	102664101	classical arabinogalactan protein 4	Up	gmx:102664101	classical arabinogalactan protein 4
Glyma.07G159700	100799090	mitotic checkpoint serine/threonine-protein kinase BUB1 beta-like	Up	gmx:100799090	uncharacterized protein LOC100799090
Glyma.09G237000	NA	NA	Up	NA	NA
Glyma.18G037800	100808928	protein FIZZY-RELATED 3	Up	gmx:100808928	protein FIZZY-RELATED 3
Glyma.03G001600	100777758	acid phosphatase 1	Up	gmx:100777758	acid phosphatase 1
Glyma.16G128800	100799995	uncharacterized LOC100799995	Up	gmx:100799995	uncharacterized protein LOC100799995
Glyma.18G289600	100789485	heat shock cognate 70 kDa protein 2	Up	gmx:100789485	heat shock cognate 70 kDa protein 2
Glyma.11G238800	547604	myo-inositol-3-phosphate synthase	Up	gmx:547604	MIPS; myo-inositol-3-phosphate synthase
Glyma.13G208300	100810771	transcription factor MUTE	Up	gmx:100810771	transcription factor MUTE
Glyma.15G134400	100779100	patellin-4-like	Up	gmx:100779100	patellin-4-like
Glyma.04G004600	100793558	endo-1,4-beta-xylanase 5	Up	gmx:100793558	endo-1,4-beta-xylanase 5
Glyma.13G038600	100816146	stearoyl-acyl carrier protein desaturase	Up	gmx:100816146	SACPD; stearoyl-acyl carrier protein desaturase
Glyma.02G259800	100306253	uncharacterized LOC100306253	Up	gmx:100306253	uncharacterized protein LOC100306253
Glyma.03G144700	100780602	uncharacterized LOC100780602	Up	gmx:100780602	uncharacterized protein LOC100780602
Glyma.15G273700	100790472	uncharacterized LOC100790472	Up	gmx:100790472	uncharacterized protein LOC100790472 isoform X2
Glyma.09G132200	100813368	beta-carotene hydroxylase 5	Up	gmx:100813368	BCH5; beta-carotene hydroxylase 5
Glyma.16G017400	100271888	late elongated hypocotyl and circadian clock associated-1-like protein 1	Up	gmx:100271888	LCL1; late elongated hypocotyl and circadian clock associated-1-like protein 1
Glyma.09G018100	102663146	protein ENDOSPERM DEFECTIVE 1	Up	gmx:102663146	protein ENDOSPERM DEFECTIVE 1
Glyma.12G063400	100813437	actin	Up	gmx:100813437	actin
Glyma.06G125700	100812580	RNA polymerase sigma factor sigE, chloroplastic/mitochondrial-like	Up	gmx:100812580	SIG5B; RNA polymerase sigma factor sigE, chloroplastic/mitochondrial-like
Glyma.09G029600	100816900	annexin D8	Up	gmx:100816900	annexin D8
Glyma.13G206700	100804205	glucose-6-phosphate/phosphate translocator 2, chloroplastic	Up	gmx:100804205	glucose-6-phosphate/phosphate translocator 2, chloroplastic
Glyma.13G089800	100787086	RNA-binding protein 38	Up	gmx:100787086	RNA-binding protein 38
Glyma.02G069700	100799493	syntaxin-related protein KNOLLE	Up	gmx:100799493	syntaxin-related protein KNOLLE
Glyma.13G250900	100789908	putative 4-hydroxy-4-methyl-2-oxoglutarate aldolase 3	Up	gmx:100789908	putative 4-hydroxy-4-methyl-2-oxoglutarate aldolase 3 isoform X1
Glyma.15G136700	100785528	polygalacturonase At1g48100	Up	gmx:100785528	polygalacturonase At1g48100
Glyma.07G155200	547698	ferritin	Up	gmx:547698	ferritin
Glyma.10G189400	100801659	tuberculostearic acid methyltransferase UfaA1	Up	gmx:100801659	uncharacterized protein LOC100801659 isoform X1
Glyma.12G195900	100804706	cyclin-U1-1	Up	gmx:100804706	cyclin-U1-1
Glyma.19G111700	100775800	WEB family protein At2g38370	Up	gmx:100775800	WEB family protein At2g38370
Glyma.03G145500	100781689	uncharacterized LOC100781689	Up	gmx:100781689	uncharacterized protein LOC100781689
Glyma.18G265200	100798813	protein WVD2-like 4	Up	gmx:100798813	protein WVD2-like 4
Glyma.15G057700	100782859	beta carbonic anhydrase 5, chloroplastic	Up	gmx:100782859	beta carbonic anhydrase 5, chloroplastic isoform X2
Glyma.02G046200	100803414	protein POLLENLESS 3-LIKE 2	Up	gmx:100803414	protein POLLENLESS 3-LIKE 2
Glyma.06G289900	100799069	reticulon-like protein B17	Up	gmx:100799069	reticulon-like protein B17 isoform X1
Glyma.17G015400	100783249	cytochrome P450 77A1	Up	gmx:100783249	cytochrome P450 77A1
Glyma.11G052200	100802923	microtubule-associated protein RP/EB family member 1C	Up	gmx:100802923	microtubule-associated protein RP/EB family member 1C
Glyma.05G008300	NA	NA	Up	NA	NA
Glyma.11G124200	100815555	B3 domain-containing transcription factor VRN1-like	Up	gmx:100815555	B3 domain-containing transcription factor VRN1-like
Glyma.06G189900	100782459	ATPase 11, plasma membrane-type	Up	gmx:100782459	ATPase 11, plasma membrane-type
Glyma.04G220700	100805054	protein NRT1/ PTR FAMILY 5.1	Up	gmx:100805054	protein NRT1/ PTR FAMILY 5.1 isoform X1
Glyma.11G095700	100527864	ubiquitin-conjugating enzyme	Up	gmx:100527864	ubiquitin-conjugating enzyme
Glyma.08G240100	100808330	ribosomal protein S18 acetylase RimI-like protein	Up	gmx:100808330	ribosomal protein S18 acetylase RimI-like protein
Glyma.02G277600	100801274	G2/mitotic-specific cyclin S13-7	Up	gmx:100801274	G2/mitotic-specific cyclin S13-7
Glyma.01G137200	100781267	protein YABBY 3	Up	gmx:100781267	protein YABBY 3
Glyma.01G085200	100816026	uncharacterized LOC100816026	Up	gmx:100816026	uncharacterized protein LOC100816026 isoform X1
Glyma.12G097800	100775829	putative MIP superfamily protein	Up	gmx:100775829	putative MIP superfamily protein
Glyma.01G221600	100801444	uncharacterized LOC100801444	Up	gmx:100801444	uncharacterized protein LOC100801444
Glyma.07G220300	100790979	cytochrome P450 89A2	Up	gmx:100790979	cytochrome P450 89A2
Glyma.03G116200	100800060	hydroquinone glucosyltransferase	Up	gmx:100800060	hydroquinone glucosyltransferase
Glyma.09G201900	100500471	uncharacterized LOC100500471	Up	gmx:100500471	uncharacterized protein LOC100500471
Glyma.16G206300	NA	NA	Up	NA	NA
Glyma.20G142100	102660305	CRIB domain-containing protein RIC10	Up	gmx:102660305	CRIB domain-containing protein RIC10
Glyma.14G210600	778060	MYB transcription factor MYB177	Up	gmx:778060	MYB177; MYB transcription factor MYB177
Glyma.04G165900	100797798	LON peptidase N-terminal domain and RING finger protein 1	Up	gmx:100797798	LON peptidase N-terminal domain and RING finger protein 1 isoform X1
Glyma.13G283900	100796590	uncharacterized LOC100796590	Up	gmx:100796590	unknown seed protein USP isoform X1
Glyma.13G306200	100780472	uncharacterized LOC100780472	Up	gmx:100780472	uncharacterized protein LOC100780472
Glyma.11G104200	100818578	DNA repair protein XRCC2 homolog	Up	gmx:100818578	DNA repair protein XRCC2 homolog isoform X2
Glyma.15G002200	100814223	ent-kaurene oxidase	Up	gmx:100814223	ent-kaurene oxidase
Glyma.14G213100	121172667	uncharacterized LOC121172667	Up	gmx:121172667	uncharacterized protein LOC121172667
Glyma.19G023200	778120	C2C2-Zn Dof transcription factor	Up	gmx:778120	C2C2-Zn Dof transcription factor
Glyma.13G303700	100801024	zinc finger protein CONSTANS-LIKE 1	Up	gmx:100801024	zinc finger protein CONSTANS-LIKE 1
Glyma.18G043800	100816954	uncharacterized LOC100816954	Up	gmx:100816954	uncharacterized protein LOC100816954
Glyma.08G344300	100305511	alpha-amylase inhibitor/lipid transfer/seed storage family protein	Up	gmx:100305511	alpha-amylase inhibitor/lipid transfer/seed storage family protein precursor
Glyma.13G307000	547872	peroxidase	Up	gmx:547872	peroxidase 3
Glyma.18G260500	100788247	cyclic dof factor 2	Up	gmx:100788247	cyclic dof factor 2
Glyma.20G062500	NA	NA	Up	NA	NA
Glyma.17G111100	547928	AAI_LTSS superfamily protein	Up	gmx:547928	ADR11; AAI_LTSS superfamily protein precursor
Glyma.10G154100	100817280	microtubule-binding protein TANGLED	Up	gmx:100817280	microtubule-binding protein TANGLED
Glyma.10G031200	100306323	uncharacterized LOC100306323	Up	gmx:100306323	uncharacterized protein LOC100306323
Glyma.13G160400	100812759	36.4 kDa proline-rich protein	Up	gmx:100812759	36.4 kDa proline-rich protein
Glyma.15G243000	100804767	glucan endo-1,3-beta-glucosidase	Up	gmx:100804767	glucan endo-1,3-beta-glucosidase isoform X1
Glyma.09G022400	100804829	peroxidase 15-like protein	Up	gmx:100804829	peroxidase 15-like protein precursor
Glyma.16G124700	100788369	protein POLLENLESS 3-LIKE 2	Up	gmx:100788369	protein POLLENLESS 3-LIKE 2
Glyma.02G126100	100778078	basic leucine zipper 43	Up	gmx:100778078	basic leucine zipper 43
Glyma.09G029400	100813185	ent-kaurenoic acid oxidase 2	Up	gmx:100813185	ent-kaurenoic acid oxidase 2
Glyma.06G006100	NA	NA	Up	NA	NA
Glyma.10G182800	100786278	kinesin-like protein KIN-10A	Up	gmx:100786278	kinesin-like protein KIN-10A
Glyma.13G094100	100306346	SCP-like extracellular protein domain-containing protein	Up	gmx:100306346	SCP-like extracellular protein domain-containing protein precursor
Glyma.04G205100	100808083	myb-related protein 308-like	Up	gmx:100808083	myb-related protein 308-like
Glyma.17G262300	547738	cyclin-dependent kinases CDKB	Up	gmx:547738	cyclin-dependent kinases CDKB
Glyma.08G028800	100787294	phospholipase A2 homolog 3-like	Up	gmx:100787294	uncharacterized protein LOC100787294
Glyma.13G056500	100305464	uncharacterized LOC100305464	Up	gmx:100305464	uncharacterized protein LOC100305464
Glyma.06G113500	100780485	chlorophyllide a oxygenase, chloroplastic	Up	gmx:100780485	chlorophyllide a oxygenase, chloroplastic isoform X1
Glyma.16G034300	100500602	uncharacterized LOC100500602	Up	gmx:100500602	uncharacterized protein LOC100500602
Glyma.10G189700	100802189	uncharacterized LOC100802189	Up	gmx:100802189	uncharacterized protein LOC100802189 isoform X1
Glyma.18G077000	102663430	lysine-rich arabinogalactan protein 19	Up	gmx:102663430	lysine-rich arabinogalactan protein 19
Glyma.10G250200	111043202	alpha/beta-hydrolases superfamily protein	Up	gmx:111043202	alpha/beta-hydrolases superfamily protein
Glyma.17G131200	100777890	scarecrow-like protein 28	Up	gmx:100777890	scarecrow-like protein 28
Glyma.15G061700	NA	NA	Up	NA	NA
Glyma.10G154200	100817813	kinesin-like protein KIN-14S	Up	gmx:100817813	kinesin-like protein KIN-14S
Glyma.09G263100	100776479	NAD(P)H-quinone oxidoreductase subunit S, chloroplastic	Up	gmx:100776479	NAD(P)H-quinone oxidoreductase subunit S, chloroplastic
Glyma.02G259200	100527370	uncharacterized LOC100527370	Up	gmx:100527370	uncharacterized protein LOC100527370
Glyma.13G049700	100797464	proline dehydrogenase 2, mitochondrial	Up	gmx:100797464	proline dehydrogenase 2, mitochondrial
Glyma.06G196600	100802277	LON peptidase N-terminal domain and RING finger protein 1	Up	gmx:100802277	LON peptidase N-terminal domain and RING finger protein 1 isoform X1
Glyma.18G278100	100301886	zinc finger protein CONSTANS-LIKE 2	Up	gmx:100301886	COL2B; zinc finger protein CONSTANS-LIKE 2
Glyma.09G031600	100809979	polygalacturonase At1g48100	Up	gmx:100809979	polygalacturonase At1g48100
Glyma.15G201700	100814752	uncharacterized LOC100814752	Up	gmx:100814752	uncharacterized protein LOC100814752
Glyma.08G308300	100783570	GDSL esterase/lipase At4g10955	Up	gmx:100783570	GDSL esterase/lipase At4g10955
Glyma.07G027300	100778916	transcription factor bHLH25	Up	gmx:100778916	transcription factor bHLH25
Glyma.02G048700	100781126	chromatin-remodeling ATPase INO80	Up	gmx:100781126	chromatin-remodeling ATPase INO80
Glyma.11G068700	100790571	GATA transcription factor 18	Up	gmx:100790571	GATA transcription factor 18
Glyma.18G245100	100500130	uncharacterized LOC100500130	Up	gmx:100500130	uncharacterized protein LOC100500130
Glyma.01G168500	100780544	B-box zinc finger protein 18	Up	gmx:100780544	B-box zinc finger protein 18
Glyma.13G133200	100794302	kinesin-like protein KIN-5B	Up	gmx:100794302	kinesin-like protein KIN-5B
Glyma.05G214900	NA	NA	Up	NA	NA
Glyma.16G155100	100782690	aquaporin PIP2-11	Up	gmx:100782690	PIP2-11; aquaporin PIP2-2
Glyma.03G063000	100780774	uncharacterized LOC100780774	Up	gmx:100780774	uncharacterized protein LOC100780774
Glyma.08G229100	100785707	probable inactive leucine-rich repeat receptor-like protein kinase At3g03770	Up	gmx:100785707	probable inactive leucine-rich repeat receptor-like protein kinase At3g03770
Glyma.09G247700	100527525	uncharacterized LOC100527525	Up	gmx:100527525	uncharacterized protein LOC100527525
Glyma.18G152400	100527244	alpha-amylase inhibitor/lipid transfer/seed storage family protein	Up	gmx:100527244	alpha-amylase inhibitor/lipid transfer/seed storage family protein precursor
Glyma.01G158000	100786416	probable protein phosphatase 2C 47	Up	gmx:100786416	probable protein phosphatase 2C 47
Glyma.13G369900	100797298	metal transporter Nramp6a	Up	gmx:100797298	NRAMP6A; metal transporter Nramp6
Glyma.13G345400	100816314	putative hydroxyacylglutathione hydrolase	Up	gmx:100816314	GLYII-7; putative hydroxyacylglutathione hydrolase
Glyma.09G238800	780543	myb-related protein 306	Up	gmx:780543	myb-related protein 306
Glyma.05G050400	100797827	transcription factor TCP9	Up	gmx:100797827	transcription factor TCP9
Glyma.01G036000	100787855	UDP-glycosyltransferase 74B1	Up	gmx:100787855	UDP-glycosyltransferase 74B1
Glyma.02G203300	547807	omega-6 fatty acid desaturase, chloroplastic	Up	gmx:547807	FAD6.1; omega-6 fatty acid desaturase, chloroplastic
Glyma.13G051000	100805275	ATP sulfurylase 2	Up	gmx:100805275	ATP sulfurylase 2
Glyma.13G215000	100778885	inactive beta-amylase 9	Up	gmx:100778885	inactive beta-amylase 9
Glyma.10G011500	NA	NA	Up	NA	NA
Glyma.20G035200	100807731	cyclic dof factor 1	Up	gmx:100807731	cyclic dof factor 1
Glyma.17G086500	100818522	tryptophan aminotransferase-related protein 2	Up	gmx:100818522	tryptophan aminotransferase-related protein 2
Glyma.15G229400	100817056	protein LNK3	Up	gmx:100817056	protein LNK3
Glyma.14G154200	100798216	cyclin-A1-4	Up	gmx:100798216	cyclin-A1-4 isoform X1
Glyma.07G186700	100780319	kinesin-like protein KIN-14C	Up	gmx:100780319	kinesin-like protein KIN-14C
Glyma.02G080700	102661108	uncharacterized LOC102661108	Up	gmx:102661108	uncharacterized protein LOC102661108
Glyma.10G288400	100810872	DNA damage-repair/toleration protein DRT100	Up	gmx:100810872	DNA damage-repair/toleration protein DRT100
Glyma.16G181600	100808528	uncharacterized LOC100808528	Up	gmx:100808528	uncharacterized protein LOC100808528
Glyma.08G003400	100527641	uncharacterized LOC100527641	Up	gmx:100527641	uncharacterized protein LOC100527641
Glyma.17G166900	100783437	FT-interacting protein 7	Up	gmx:100783437	FT-interacting protein 7
Glyma.16G139400	100801623	GATA transcription factor 18	Up	gmx:100801623	GATA transcription factor 18
Glyma.02G128000	547981	S-adenosylmethionine decarboxylase	Up	gmx:547981	SAMDC; S-adenosylmethionine decarboxylase
Glyma.13G066600	100815077	transcription factor MYB35	Up	gmx:100815077	transcription factor MYB35
Glyma.13G319100	NA	NA	Up	NA	NA
Glyma.07G133800	NA	NA	Up	NA	NA
Glyma.11G244900	100816256	probable pectate lyase 5	Up	gmx:100816256	probable pectate lyase 5
Glyma.09G039000	100777900	uncharacterized LOC100777900	Up	gmx:100777900	uncharacterized protein LOC100777900 isoform X2
Glyma.05G208700	100793242	aquaporin PIP1-5	Up	gmx:100793242	PIP1-5; aquaporin PIP1-5
Glyma.09G010800	NA	NA	Up	NA	NA
Glyma.12G018900	NA	NA	Up	NA	NA
Glyma.01G125800	100799290	probably inactive leucine-rich repeat receptor-like protein kinase IMK2	Up	gmx:100799290	probably inactive leucine-rich repeat receptor-like protein kinase IMK2
Glyma.03G123600	NA	NA	Up	NA	NA
Glyma.14G115500	547594	proline-rich protein	Up	gmx:547594	SBPRP; proline-rich protein precursor
Glyma.06G294500	100810778	expansin-B3-like	Up	gmx:100810778	EXPB4; expansin-B3-like precursor
Glyma.15G144700	NA	NA	Up	NA	NA
Glyma.20G097100	NA	NA	Up	NA	NA
Glyma.06G290300	100801192	protein TPX2	Up	gmx:100801192	protein TPX2 isoform X1
Glyma.08G325200	100817066	kinesin-like protein KIN-12F	Up	gmx:100817066	kinesin-like protein KIN-12F
Glyma.07G032300	100499847	zinc finger Ran-binding domain-containing protein	Up	gmx:100499847	zinc finger Ran-binding domain-containing protein
Glyma.10G211000	100817292	aquaporin PIP2-13	Up	gmx:100817292	PIP2-13; aquaporin PIP2-13
Glyma.20G241700	732546	chalcone--flavonone isomerase 2-A	Up	gmx:732546	CHI2-A; chalcone--flavonone isomerase 2-A
Glyma.06G000600	100812029	cyclin-B2-3-like	Up	gmx:100812029	uncharacterized protein LOC100812029
Glyma.01G071300	121172625	S-adenosylmethionine decarboxylase proenzyme-like	Up	gmx:121172625	S-adenosylmethionine decarboxylase proenzyme-like
Glyma.18G216200	100796675	probable inactive receptor kinase At5g58300	Up	gmx:100796675	probable inactive receptor kinase At5g58300
Glyma.19G258000	100797794	ras-related protein RABA3-like	Up	gmx:100797794	ras-related protein RABA3-like
Glyma.19G159000	100791091	sulfate transporter 3.1	Up	gmx:100791091	sulfate transporter 3.1
Glyma.10G230400	100792820	uncharacterized LOC100792820	Up	gmx:100792820	uncharacterized protein LOC100792820
Glyma.07G207000	NA	NA	Up	NA	NA
Glyma.04G025300	100305700	uncharacterized LOC100305700	Up	gmx:100305700	uncharacterized protein LOC100305700
Glyma.14G037100	547782	mitotic cyclin b1-type	Up	gmx:547782	CYCB1;3; mitotic cyclin b1-type
Glyma.16G165600	NA	NA	Up	NA	NA
Glyma.19G147800	100806476	probable protein phosphatase 2C 25	Up	gmx:100806476	probable protein phosphatase 2C 25
Glyma.07G116700	100786209	transcription factor bHLH18	Up	gmx:100786209	transcription factor bHLH18
Glyma.20G203500	100775830	ethylene-responsive transcription factor ERF096	Up	gmx:100775830	ethylene-responsive transcription factor ERF096
Glyma.10G195700	100817655	receptor-like protein kinase	Up	gmx:100817655	receptor-like protein kinase
Glyma.15G150100	100527842	uncharacterized LOC100527842	Up	gmx:100527842	uncharacterized protein LOC100527842
Glyma.08G213100	100790665	phosphatidylcholine:diacylglycerol cholinephosphotransferase 1	Up	gmx:100790665	phosphatidylcholine:diacylglycerol cholinephosphotransferase 1
Glyma.20G207200	100779567	kinesin-like protein KIN-10A	Up	gmx:100779567	kinesin-like protein KIN-10A
Glyma.13G228900	102669757	uncharacterized LOC102669757	Up	gmx:102669757	uncharacterized protein LOC102669757
Glyma.18G272200	100784882	UDP-arabinopyranose mutase 1	Up	gmx:100784882	UDP-arabinopyranose mutase 1
Glyma.03G177300	100807156	protein REVEILLE 8	Up	gmx:100807156	protein REVEILLE 8
Glyma.19G214100	100804687	cellulose synthase-like protein D5	Up	gmx:100804687	cellulose synthase-like protein D5
Glyma.06G117800	100792543	glutathione S-transferase TCHQD-like	Up	gmx:100792543	TCHQD1; glutathione S-transferase TCHQD-like
Glyma.11G253200	100785790	kinesin-like protein KIN-12B	Up	gmx:100785790	kinesin-like protein KIN-12B isoform X1
Glyma.09G008800	100809091	EH domain-containing protein 1	Up	gmx:100809091	EH domain-containing protein 1
Glyma.06G049500	100820031	squalene monooxygenase SE1	Up	gmx:100820031	squalene monooxygenase SE1
Glyma.09G138100	100779306	oxalate--CoA ligase	Up	gmx:100779306	oxalate--CoA ligase
Glyma.13G310700	100814373	kinesin-like protein KIN-12E	Up	gmx:100814373	kinesin-like protein KIN-12E
Glyma.15G146800	100777503	probable polygalacturonase	Up	gmx:100777503	probable polygalacturonase isoform X2
Glyma.14G007000	100778557	glucan endo-1,3-beta-glucosidase 12	Up	gmx:100778557	glucan endo-1,3-beta-glucosidase 12
Glyma.11G247400	100808950	mitotic spindle checkpoint protein MAD2	Up	gmx:100808950	mitotic spindle checkpoint protein MAD2
Glyma.08G227700	100789774	ethylene-responsive transcription factor WRI1a	Up	gmx:100789774	WRI1A; ethylene-responsive transcription factor WRI1a
Glyma.12G015300	100798341	alcohol dehydrogenase-like 2-like	Up	gmx:100798341	uncharacterized protein LOC100798341
Glyma.20G234100	100788477	kinesin-like protein KIN-14S	Up	gmx:100788477	kinesin-like protein KIN-14S
Glyma.08G132700	100778763	bifunctional riboflavin biosynthesis protein RIBA 1, chloroplastic	Up	gmx:100778763	bifunctional riboflavin biosynthesis protein RIBA 1, chloroplastic isoform X2
Glyma.04G079100	121174775	glycine-rich cell wall structural protein 1-like	Up	gmx:121174775	glycine-rich cell wall structural protein 1-like
Glyma.14G223000	100812416	L-ascorbate oxidase homolog	Up	gmx:100812416	L-ascorbate oxidase homolog isoform X1
Glyma.08G079100	NA	NA	Up	NA	NA
Glyma.14G047200	100794669	protein NRT1/ PTR FAMILY 6.4	Up	gmx:100794669	protein NRT1/ PTR FAMILY 6.4
Glyma.15G069900	NA	NA	Up	NA	NA
Glyma.16G141500	778191	bZIP transcription factor bZIP117	Up	gmx:778191	BZIP117; bZIP transcription factor bZIP117 isoform 1
Glyma.03G163100	100775603	transcription factor MYB14	Up	gmx:100775603	transcription factor MYB14
Glyma.11G092600	100793550	uncharacterized protein YFR016C	Up	gmx:100793550	uncharacterized protein YFR016C isoform X1
Glyma.07G132100	100804591	kinesin-like protein KIN-10B	Up	gmx:100804591	kinesin-like protein KIN-10B
Glyma.11G233500	100810353	probably inactive leucine-rich repeat receptor-like protein kinase IMK2	Up	gmx:100810353	probably inactive leucine-rich repeat receptor-like protein kinase IMK2
Glyma.13G281600	100818795	uncharacterized LOC100818795	Up	gmx:100818795	uncharacterized protein LOC100818795 isoform X2
Glyma.09G039800	102664553	extensin-2	Up	gmx:102664553	extensin-2
Glyma.16G023500	100794522	uncharacterized protein At4g00950	Up	gmx:100794522	uncharacterized protein At4g00950 isoform X1
Glyma.14G067000	100789921	ribulose bisphosphate carboxylase/oxygenase activase 1, chloroplastic-like	Up	gmx:100789921	RCA14; ribulose bisphosphate carboxylase/oxygenase activase 1, chloroplastic-like
Glyma.16G188900	100799829	O-glucosyltransferase rumi homolog	Up	gmx:100799829	O-glucosyltransferase rumi homolog
Glyma.05G085400	100787957	kinesin-like protein KIN-4A	Up	gmx:100787957	kinesin-like protein KIN-4A isoform X1
Glyma.11G022100	100801504	uncharacterized LOC100801504	Up	gmx:100801504	uncharacterized protein LOC100801504
Glyma.13G114200	100791845	kinesin-like protein KIN-7B	Up	gmx:100791845	kinesin-like protein KIN-7B isoform X1
Glyma.10G090000	100787008	DNA topoisomerase 2-like	Up	gmx:100787008	DNA topoisomerase 2-like isoform X2
Glyma.04G030400	NA	NA	Up	NA	NA
Glyma.07G260600	100818470	uncharacterized LOC100818470	Up	gmx:100818470	uncharacterized protein LOC100818470
Glyma.11G251800	100788444	uncharacterized LOC100788444	Up	gmx:100788444	uncharacterized protein LOC100788444
Glyma.07G256900	100783018	uncharacterized LOC100783018	Up	gmx:100783018	uncharacterized protein LOC100783018
Glyma.04G173200	100815390	uncharacterized LOC100815390	Up	gmx:100815390	uncharacterized protein LOC100815390
Glyma.15G276000	100796974	DNA topoisomerase 2	Up	gmx:100796974	DNA topoisomerase 2
Glyma.16G126400	100806748	alpha-mannosidase	Up	gmx:100806748	alpha-mannosidase
Glyma.13G368700	100809888	transcription factor bHLH25	Up	gmx:100809888	transcription factor bHLH25
Glyma.06G318200	100782464	probable folate-biopterin transporter 8, chloroplastic	Up	gmx:100782464	probable folate-biopterin transporter 8, chloroplastic
Glyma.11G008300	100811424	uncharacterized LOC100811424	Up	gmx:100811424	uncharacterized protein LOC100811424 isoform X1
Glyma.08G210200	100527535	uncharacterized LOC100527535	Up	gmx:100527535	uncharacterized protein LOC100527535
Glyma.17G127200	100813009	uncharacterized protein slr0889	Up	gmx:100813009	uncharacterized protein slr0889
Glyma.09G204100	100788576	abscisic acid receptor PYR1	Up	gmx:100788576	abscisic acid receptor PYR1
Glyma.18G010500	100798298	small heat shock protein, chloroplastic	Up	gmx:100798298	small heat shock protein, chloroplastic isoform X1
Glyma.04G098800	100807016	uncharacterized LOC100807016	Up	gmx:100807016	uncharacterized protein LOC100807016
Glyma.16G216800	100782354	uncharacterized protein At4g15970	Up	gmx:100782354	uncharacterized protein At4g15970 isoform X1
Glyma.10G138200	100779504	protein S-acyltransferase 18	Up	gmx:100779504	protein S-acyltransferase 18
Glyma.06G105200	NA	NA	Up	NA	NA
Glyma.03G237800	100780066	kinesin-like protein KIN-14S	Up	gmx:100780066	kinesin-like protein KIN-14S isoform X3
Glyma.10G152000	100799158	rapid alkalinization factor	Up	gmx:100799158	rapid alkalinization factor
Glyma.03G193300	778152	transcriptional activator hacA	Up	gmx:778152	uncharacterized protein LOC778152 isoform X1
Glyma.20G203000	100789012	CASP-like protein 5B3	Up	gmx:100789012	CASP-like protein 5B3
Glyma.13G293700	100818445	glutaredoxin-C9	Up	gmx:100818445	glutaredoxin-C9
Glyma.13G257200	100811331	beta carbonic anhydrase 5, chloroplastic	Up	gmx:100811331	beta carbonic anhydrase 5, chloroplastic
Glyma.05G228100	100527241	DNA-binding domain-containing protein	Up	gmx:100527241	DNA-binding domain-containing protein
Glyma.11G033900	100810744	uncharacterized LOC100810744	Up	gmx:100810744	uncharacterized protein LOC100810744 isoform X3
Glyma.13G255800	100807224	anthocyanidin 3-O-glucosyltransferase 7	Up	gmx:100807224	anthocyanidin 3-O-glucosyltransferase 7
Glyma.13G119000	100800293	ABC transporter B family member 11	Up	gmx:100800293	ABC transporter B family member 11
Glyma.13G108500	102668213	RING-H2 finger protein ATL52	Up	gmx:102668213	RING-H2 finger protein ATL52
Glyma.16G017700	100783582	transcription factor bHLH57	Up	gmx:100783582	transcription factor bHLH57 isoform X2
Glyma.10G067100	100813767	uncharacterized LOC100813767	Up	gmx:100813767	uncharacterized protein LOC100813767
Glyma.01G098700	100796466	putative haloacid dehalogenase-like hydrolase	Up	gmx:100796466	putative haloacid dehalogenase-like hydrolase
Glyma.02G202500	100780041	aldehyde dehydrogenase 11A1	Up	gmx:100780041	ALDH11A1; NADP-dependent glyceraldehyde-3-phosphate dehydrogenase
Glyma.15G118500	100776967	heavy metal-associated isoprenylated plant protein 7	Up	gmx:100776967	heavy metal-associated isoprenylated plant protein 7
Glyma.06G067000	NA	NA	Up	NA	NA
Glyma.13G303000	100799951	putative cyclin-D6-1-like	Up	gmx:100799951	putative cyclin-D6-1-like
Glyma.18G165000	100795449	uncharacterized LOC100795449	Up	gmx:100795449	uncharacterized protein LOC100795449 isoform X1
Glyma.03G104700	100779176	hydroquinone glucosyltransferase	Up	gmx:100779176	hydroquinone glucosyltransferase
Glyma.19G195300	100800246	kinesin-like protein KIN-5C	Up	gmx:100800246	kinesin-like protein KIN-5C
Glyma.05G241900	100788837	uncharacterized LOC100788837	Up	gmx:100788837	uncharacterized protein LOC100788837
Glyma.11G256100	100305590	uncharacterized LOC100305590	Up	gmx:100305590	uncharacterized protein LOC100305590 precursor
Glyma.02G108600	100788246	cyclic dof factor 1	Up	gmx:100788246	cyclic dof factor 1
Glyma.06G169700	100798203	acetolactate synthase 3, chloroplastic	Up	gmx:100798203	acetolactate synthase 3, chloroplastic
Glyma.09G138300	100789969	O-glucosyltransferase rumi homolog	Up	gmx:100789969	O-glucosyltransferase rumi homolog isoform X2
Glyma.20G179700	100815583	aquaporin PIP2-14	Up	gmx:100815583	PIP2-14; aquaporin PIP2-1
Glyma.14G048400	100797861	glucan endo-1,3-beta-glucosidase 12	Up	gmx:100797861	glucan endo-1,3-beta-glucosidase 12
Glyma.13G278400	100780486	MLO-like protein 11	Up	gmx:100780486	MLO-like protein 11
Glyma.15G114800	100813326	rho GDP-dissociation inhibitor 1	Up	gmx:100813326	rho GDP-dissociation inhibitor 1
Glyma.11G220300	100783835	aspartic proteinase PCS1	Up	gmx:100783835	aspartic proteinase PCS1
Glyma.04G225400	100795129	uncharacterized LOC100795129	Up	gmx:100795129	uncharacterized protein LOC100795129 isoform X2
Glyma.08G017300	100803375	probable polygalacturonase	Up	gmx:100803375	probable polygalacturonase isoform X2
Glyma.08G038200	100809945	pentatricopeptide repeat-containing protein At5g21222	Up	gmx:100809945	pentatricopeptide repeat-containing protein At5g21222 isoform X1
Glyma.14G224000	100808302	cyclin-dependent kinase B2-2	Up	gmx:100808302	cyclin-dependent kinase B2-2
Glyma.20G162600	100802778	beta-carotene hydroxylase 4	Up	gmx:100802778	BCH4; beta-carotene hydroxylase 4
Glyma.20G150300	100809515	heat stress transcription factor 37	Up	gmx:100809515	HSF-37; heat stress transcription factor A-6b
Glyma.20G033900	100527059	uncharacterized LOC100527059	Up	gmx:100527059	uncharacterized protein LOC100527059 precursor
Glyma.18G211800	100785049	WEB family protein At2g38370	Up	gmx:100785049	WEB family protein At2g38370
Glyma.07G022400	100809919	galactoside 2-alpha-L-fucosyltransferase	Up	gmx:100809919	probable fucosyltransferase 8 isoform X1
Glyma.03G217500	100797597	cellulose synthase-like protein D5	Up	gmx:100797597	cellulose synthase-like protein D5
Glyma.02G212000	100811580	serine/threonine-protein kinase-like protein At1g28390	Up	gmx:100811580	serine/threonine-protein kinase-like protein At1g28390
Glyma.14G011100	100811516	kinesin-like protein KIN-14F	Up	gmx:100811516	kinesin-like protein KIN-14F
Glyma.10G061300	NA	NA	Up	NA	NA
Glyma.11G110900	100527369	uncharacterized LOC100527369	Up	gmx:100527369	uncharacterized protein LOC100527369
Glyma.19G150900	100816095	pterocarpan synthase-like	Up	gmx:100816095	PTS-L2; pterocarpan synthase 1
Glyma.12G096900	100500469	cellulose synthase-like protein H1	Up	gmx:100500469	cellulose synthase-like protein H1 isoform X1
Glyma.10G138500	100781660	auxin-responsive protein IAA30	Up	gmx:100781660	auxin-responsive protein IAA30
Glyma.08G314900	100794157	uncharacterized LOC100794157	Up	gmx:100794157	uncharacterized protein LOC100794157 isoform X1
Glyma.04G190500	100813072	alpha/beta hydrolase domain-containing protein 17C	Up	gmx:100813072	alpha/beta hydrolase domain-containing protein 17C
Glyma.18G023500	547641	receptor-like kinase RHG1	Up	gmx:547641	RHG1; receptor-like kinase RHG1
Glyma.13G079900	100803677	long chain acyl-CoA synthetase 9, chloroplastic	Up	gmx:100803677	long chain acyl-CoA synthetase 9, chloroplastic
Glyma.15G267000	100817228	ATP-citrate synthase alpha chain protein 1	Up	gmx:100817228	ATP-citrate synthase alpha chain protein 1
Glyma.01G208000	100791905	formyltetrahydrofolate deformylase 2, mitochondrial	Up	gmx:100791905	formyltetrahydrofolate deformylase 1, mitochondrial isoform X2
Glyma.11G192600	100782408	zinc finger protein ZAT5	Up	gmx:100782408	zinc finger protein ZAT5
Glyma.05G211400	100817717	protein ROH1	Up	gmx:100817717	protein ROH1
Glyma.12G076700	100815735	cytokinin riboside 5'-monophosphate phosphoribohydrolase LOG1	Up	gmx:100815735	cytokinin riboside 5'-monophosphate phosphoribohydrolase LOG1
Glyma.13G354900	100800844	NADP-dependent malic enzyme	Up	gmx:100800844	NADP-dependent malic enzyme
Glyma.09G087100	NA	NA	Up	NA	NA
Glyma.04G215900	100789000	actin-7	Up	gmx:100789000	actin-7 isoform X2
Glyma.17G098100	100805898	uncharacterized LOC100805898	Up	gmx:100805898	uncharacterized protein LOC100805898
Glyma.06G113400	100786028	TLC domain-containing protein 2	Up	gmx:100786028	TLC domain-containing protein 2
Glyma.03G217300	100796524	protein DEHYDRATION-INDUCED 19 homolog 3	Up	gmx:100796524	protein DEHYDRATION-INDUCED 19 homolog 3
Glyma.08G165700	100796987	nuclear factor Y transcription factor family protein	Up	gmx:100796987	NF-YC06; nuclear factor Y transcription factor family protein
Glyma.02G283400	100817119	phytoene synthase 2, chloroplastic	Up	gmx:100817119	phytoene synthase 2, chloroplastic
Glyma.11G221000	100818034	ribulose bisphosphate carboxylase/oxygenase activase, chloroplastic-like	Up	gmx:100818034	RCA11; ribulose bisphosphate carboxylase/oxygenase activase, chloroplastic-like
Glyma.15G154900	100787290	DNA replication licensing factor MCM6	Up	gmx:100787290	DNA replication licensing factor MCM6 isoform X1
Glyma.06G235000	100783005	UDP-glycosyltransferase 79B3	Up	gmx:100783005	UDP-glycosyltransferase 79B3
Glyma.13G163900	100808456	calcium uptake protein, mitochondrial	Up	gmx:100808456	calcium uptake protein, mitochondrial isoform X1
Glyma.08G255200	100301885	CONSTANS-like 2a	Up	gmx:100301885	COL2a; CONSTANS-like 2a
Glyma.18G275300	100776860	rhamnogalacturonan I rhamnosyltransferase 1	Up	gmx:100776860	rhamnogalacturonan I rhamnosyltransferase 1
Glyma.17G075300	100789100	aldehyde dehydrogenase 11A2	Up	gmx:100789100	ALDH11A2; NADP-dependent glyceraldehyde-3-phosphate dehydrogenase
Glyma.U038600	NA	NA	Up	NA	NA
Glyma.11G076100	100803281	filament-like plant protein 4	Up	gmx:100803281	filament-like plant protein 4
Glyma.19G213900	100527153	uncharacterized LOC100527153	Up	gmx:100527153	uncharacterized protein LOC100527153
Glyma.08G035000	100778201	ethylene-responsive transcription factor TINY	Up	gmx:100778201	ethylene-responsive transcription factor TINY
Glyma.02G311900	100500123	uncharacterized LOC100500123	Up	gmx:100500123	uncharacterized protein LOC100500123
Glyma.19G260000	100802573	pyruvate dehydrogenase E1 component subunit alpha-3, chloroplastic	Up	gmx:100802573	pyruvate dehydrogenase E1 component subunit alpha-3, chloroplastic
Glyma.09G043900	100789287	putative E3 ubiquitin-protein ligase LIN-1	Up	gmx:100789287	putative E3 ubiquitin-protein ligase LIN-1
Glyma.07G020900	100795565	uncharacterized LOC100795565	Up	gmx:100795565	uncharacterized protein LOC100795565 isoform X1
Glyma.06G082300	100811335	transcription factor MYB3R-1	Up	gmx:100811335	transcription factor MYB3R-1
Glyma.02G100800	NA	NA	Up	NA	NA
Glyma.16G217700	778089	protein REVEILLE 7	Up	gmx:778089	protein REVEILLE 7 isoform X2
Glyma.02G046800	100775419	alpha-mannosidase	Up	gmx:100775419	alpha-mannosidase
Glyma.16G113000	100815480	3-hydroxy-3-methylglutaryl-coenzyme A reductase 3	Up	gmx:100815480	3-hydroxy-3-methylglutaryl-coenzyme A reductase 3
Glyma.08G017700	100814592	protein ROH1	Up	gmx:100814592	protein ROH1
Glyma.05G068400	100788122	BOI-related E3 ubiquitin-protein ligase 1	Up	gmx:100788122	BOI-related E3 ubiquitin-protein ligase 1 isoform X2
Glyma.18G272300	100785414	cytochrome P450 85A-like	Up	gmx:100785414	cytochrome P450 85A-like
Glyma.04G209200	100813602	amino acid permease 3	Up	gmx:100813602	amino acid permease 3 isoform X1
Glyma.08G175300	NA	NA	Up	NA	NA
Glyma.08G039400	100814585	leucine-rich repeat extensin-like protein 4	Up	gmx:100814585	leucine-rich repeat extensin-like protein 4
Glyma.17G127300	100811233	uncharacterized LOC100811233	Up	gmx:100811233	uncharacterized protein LOC100811233
Glyma.13G362800	100780674	uncharacterized LOC100780674	Up	gmx:100780674	uncharacterized protein LOC100780674 precursor
Glyma.12G037200	100818604	B-box zinc finger protein 18	Up	gmx:100818604	B-box zinc finger protein 18
Glyma.20G100500	100305369	NBS-LRR disease resistance protein	Up	gmx:100305369	NBS-LRR disease resistance protein precursor
Glyma.10G063100	100500225	nucleobase-cation symporter1 family protein	Up	gmx:100500225	nucleobase-cation symporter1 family protein
Glyma.08G241600	100810471	cyclic nucleotide-gated ion channel 2	Up	gmx:100810471	cyclic nucleotide-gated ion channel 2 isoform X1
Glyma.16G217000	100783429	uncharacterized protein At4g15970	Up	gmx:100783429	uncharacterized protein At4g15970
Glyma.14G015700	100818984	zinc finger CCCH domain-containing protein 18	Up	gmx:100818984	zinc finger CCCH domain-containing protein 18 isoform X1
Glyma.15G117000	100811357	mediator of RNA polymerase II transcription subunit 2	Up	gmx:100811357	mediator of RNA polymerase II transcription subunit 2
Glyma.05G214300	100814524	probable inactive receptor kinase At4g23740	Up	gmx:100814524	probable inactive receptor kinase At4g23740
Glyma.01G200500	NA	NA	Up	NA	NA
Glyma.15G100900	100777670	probable protein phosphatase 2C 35	Up	gmx:100777670	probable protein phosphatase 2C 35 isoform X2
Glyma.13G042500	102660077	classical arabinogalactan protein 1	Up	gmx:102660077	classical arabinogalactan protein 1
Glyma.07G020400	100781783	B-box zinc finger protein 32	Up	gmx:100781783	B-box zinc finger protein 32
Glyma.07G110900	100810799	obtusifoliol 14-alpha demethylase	Up	gmx:100810799	obtusifoliol 14-alpha demethylase
Glyma.10G249600	100784694	mavicyanin	Up	gmx:100784694	mavicyanin
Glyma.06G160200	100786707	patellin-3	Up	gmx:100786707	patellin-3
Glyma.04G216100	100137080	trihelix transcription factor	Up	gmx:100137080	GT-2A; trihelix transcription factor
Glyma.11G166900	NA	NA	Up	NA	NA
Glyma.13G215400	100780482	divinyl chlorophyllide a 8-vinyl-reductase, chloroplastic	Up	gmx:100780482	divinyl chlorophyllide a 8-vinyl-reductase, chloroplastic
Glyma.02G034700	100797939	polygalacturonase 1 beta-like protein 3	Up	gmx:100797939	polygalacturonase 1 beta-like protein 3
Glyma.07G271200	100805114	UDP-glucose 4-epimerase GEPI42-like	Up	gmx:100805114	uncharacterized protein LOC100805114
Glyma.14G031200	100811518	phytoene synthase 2, chloroplastic	Up	gmx:100811518	phytoene synthase 2, chloroplastic
Glyma.03G071700	100776515	aldehyde oxidase GLOX	Up	gmx:100776515	aldehyde oxidase GLOX
Glyma.19G035800	100798148	7-deoxyloganetin glucosyltransferase	Up	gmx:100798148	7-deoxyloganetin glucosyltransferase
Glyma.01G127400	100808529	dirigent family protein	Up	gmx:100808529	dirigent family protein precursor
Glyma.17G017200	100777897	uncharacterized LOC100777897	Up	gmx:100777897	uncharacterized protein LOC100777897
Glyma.03G018800	100814309	transcription factor TCP9	Up	gmx:100814309	transcription factor TCP9
Glyma.04G184500	100799543	uncharacterized LOC100799543	Up	gmx:100799543	uncharacterized protein LOC100799543
Glyma.07G248100	100808829	heavy metal-associated isoprenylated plant protein 35	Up	gmx:100808829	heavy metal-associated isoprenylated plant protein 35
Glyma.15G114700	100815465	acyl-CoA--sterol O-acyltransferase 1-like	Up	gmx:100815465	acyl-CoA--sterol O-acyltransferase 1-like
Glyma.19G014500	100776699	metalloendoproteinase 1	Up	gmx:100776699	metalloendoproteinase 1
Glyma.04G200500	100217332	inducer of CBF expression 1	Up	gmx:100217332	ICE1; inducer of CBF expression 1
Glyma.05G233300	100777792	aluminum-activated malate transporter family protein	Up	gmx:100777792	ALMT10; aluminum-activated malate transporter 9
Glyma.02G267800	100813745	E3 ubiquitin-protein ligase COP1	Up	gmx:100813745	E3 ubiquitin-protein ligase COP1
Glyma.03G130300	100789672	haloacid dehalogenase-like hydrolase domain-containing protein 3	Up	gmx:100789672	haloacid dehalogenase-like hydrolase domain-containing protein 3
Glyma.16G200400	100791539	uncharacterized LOC100791539	Up	gmx:100791539	uncharacterized protein LOC100791539 isoform X1
Glyma.17G152800	100777535	two-component response regulator-like APRR2	Up	gmx:100777535	two-component response regulator-like APRR2
Glyma.05G070200	100820385	two-component response regulator-like APRR2	Up	gmx:100820385	two-component response regulator-like APRR2 isoform X1
Glyma.01G193700	100818855	mitochondrial outer membrane protein porin of 34 kDa-like	Up	gmx:100818855	uncharacterized protein LOC100818855
Glyma.11G029500	100170749	CPD photolyase	Up	gmx:100170749	PHR; CPD photolyase
Glyma.15G181800	100817225	uncharacterized LOC100817225	Up	gmx:100817225	uncharacterized protein LOC100817225
Glyma.07G237500	100788167	cell wall / vacuolar inhibitor of fructosidase 1	Up	gmx:100788167	cell wall / vacuolar inhibitor of fructosidase 1
Glyma.10G058900	100795277	serine/threonine protein phosphatase 2A 57 kDa regulatory subunit B'	Up	gmx:100795277	serine/threonine protein phosphatase 2A 57 kDa regulatory subunit B' beta isoform
Glyma.08G329900	100814766	fasciclin-like arabinogalactan protein 1	Up	gmx:100814766	fasciclin-like arabinogalactan protein 1
Glyma.02G110300	100794036	uncharacterized LOC100794036	Up	gmx:100794036	uncharacterized protein LOC100794036
Glyma.03G101000	100817486	putative ABC transporter C family member 15	Up	gmx:100817486	putative ABC transporter C family member 15
Glyma.12G215700	100816798	uncharacterized LOC100816798	Up	gmx:100816798	uncharacterized protein LOC100816798
Glyma.13G089500	100808998	uncharacterized LOC100808998	Up	gmx:100808998	uncharacterized protein LOC100808998
Glyma.06G083600	100814020	uncharacterized LOC100814020	Up	gmx:100814020	uncharacterized protein LOC100814020
Glyma.13G147700	100819871	purine-uracil permease NCS1	Up	gmx:100819871	purine-uracil permease NCS1
Glyma.11G059200	100796699	L-ascorbate oxidase homolog	Up	gmx:100796699	L-ascorbate oxidase homolog
Glyma.04G252600	100817333	uncharacterized LOC100817333	Up	gmx:100817333	uncharacterized protein LOC100817333
Glyma.02G018900	100804830	transcription factor PRE6	Up	gmx:100804830	transcription factor PRE6
Glyma.20G135400	100776178	cyclin-D4-1	Up	gmx:100776178	cyclin-D4-1 isoform X1
Glyma.01G187400	100798779	DNA polymerase alpha catalytic subunit	Up	gmx:100798779	DNA polymerase alpha catalytic subunit
Glyma.02G269000	100800383	glucan endo-1,3-beta-glucosidase 12	Up	gmx:100800383	glucan endo-1,3-beta-glucosidase 12
Glyma.05G056100	100788318	monocopper oxidase-like protein SKU5	Up	gmx:100788318	monocopper oxidase-like protein SKU5
Glyma.18G031800	100796164	uncharacterized LOC100796164	Up	gmx:100796164	uncharacterized protein LOC100796164
Glyma.04G196100	100782250	acetolactate synthase 1, chloroplastic-like	Up	gmx:100782250	acetolactate synthase 1, chloroplastic-like
Glyma.11G166500	NA	NA	Up	NA	NA
Glyma.13G110800	100786523	subtilisin-like protease SBT1.8	Up	gmx:100786523	subtilisin-like protease SBT1.8
Glyma.14G150600	100820586	chlorophyllide a oxygenase, chloroplastic	Up	gmx:100820586	chlorophyllide a oxygenase, chloroplastic isoform X1
Glyma.05G175500	100795684	bifunctional riboflavin biosynthesis protein RIBA 1, chloroplastic	Up	gmx:100795684	bifunctional riboflavin biosynthesis protein RIBA 1, chloroplastic isoform X1
Glyma.18G037900	100795471	telomere repeat-binding protein 3	Up	gmx:100795471	telomere repeat-binding protein 3 isoform X1
Glyma.17G048700	100797924	subtilisin-like protease SBT1.8	Up	gmx:100797924	subtilisin-like protease SBT1.8
Glyma.10G076100	100795470	B3 domain-containing protein At2g36080	Up	gmx:100795470	B3 domain-containing protein At2g36080
Glyma.10G172900	100810191	metal-nicotianamine transporter YSL1	Up	gmx:100810191	metal-nicotianamine transporter YSL1
Glyma.01G011300	100795944	pentatricopeptide repeat-containing protein At1g31920	Up	gmx:100795944	pentatricopeptide repeat-containing protein At1g31920
Glyma.13G285800	100800127	uncharacterized LOC100800127	Up	gmx:100800127	uncharacterized protein LOC100800127
Glyma.05G025400	NA	NA	Up	NA	NA
Glyma.02G199300	100818531	transcription repressor OFP6	Up	gmx:100818531	transcription repressor OFP6
Glyma.11G225400	100782060	uncharacterized LOC100782060	Up	gmx:100782060	uncharacterized protein LOC100782060
Glyma.01G052300	102666756	uncharacterized LOC102666756	Up	gmx:102666756	uncharacterized protein LOC102666756
Glyma.16G173100	100815822	plastidial pyruvate kinase 2	Up	gmx:100815822	plastidial pyruvate kinase 2
Glyma.06G044500	100796597	uncharacterized LOC100796597	Up	gmx:100796597	LOW QUALITY PROTEIN: uncharacterized protein LOC100796597
Glyma.10G100800	100809808	guanylate kinase 2	Up	gmx:100809808	guanylate kinase 2 isoform X1
Glyma.05G156800	100786518	peptidyl-tRNA hydrolase, mitochondrial	Up	gmx:100786518	peptidyl-tRNA hydrolase, mitochondrial isoform X1
Glyma.15G179800	100813156	FCS-Like Zinc finger 14	Down	gmx:100813156	FCS-Like Zinc finger 14
Glyma.05G047700	100812388	SNF1-related protein kinase regulatory subunit gamma-1	Down	gmx:100812388	SNF1-related protein kinase regulatory subunit gamma-1 isoform X1
Glyma.01G157400	100789620	RING-H2 finger protein ATL8	Down	gmx:100789620	RING-H2 finger protein ATL8
Glyma.15G051100	NA	NA	Down	NA	NA
Glyma.08G284700	102668613	cell division control protein 48 homolog E-like	Down	gmx:102668613	cell division control protein 48 homolog E-like isoform X1
Glyma.09G098600	100807822	two-component response regulator ARR12	Down	gmx:100807822	two-component response regulator ARR12
Glyma.13G281300	100789383	uncharacterized LOC100789383	Down	gmx:100789383	uncharacterized protein LOC100789383
Glyma.10G203600	NA	NA	Down	NA	NA
Glyma.13G180800	100784255	general transcription and DNA repair factor IIH subunit TFB2	Down	gmx:100784255	general transcription and DNA repair factor IIH subunit TFB2
Glyma.20G002400	100785995	chaperone protein dnaJ C76, chloroplastic	Down	gmx:100785995	chaperone protein dnaJ C76, chloroplastic
Glyma.10G050500	102660188	uncharacterized LOC102660188	Down	gmx:102660188	uncharacterized protein LOC102660188
Glyma.09G035700	100804088	uncharacterized LOC100804088	Down	gmx:100804088	uncharacterized protein LOC100804088
Glyma.14G024700	100787977	purple acid phosphatase 18-like	Down	gmx:100787977	PHYTASE; purple acid phosphatase 18-like
Glyma.07G250900	100792038	RING finger and CHY zinc finger domain-containing protein 1-like	Down	gmx:100792038	uncharacterized protein LOC100792038
Glyma.02G017200	NA		Down
Glyma.19G063100	100776887	chaperone protein dnaJ C76, chloroplastic	Down	gmx:100776887	chaperone protein dnaJ C76, chloroplastic
Glyma.15G109800	100499909	uncharacterized LOC100499909	Down	gmx:100499909	uncharacterized protein LOC100499909
Glyma.11G250900	100499928	uncharacterized LOC100499928	Down	gmx:100499928	uncharacterized protein LOC100499928
Glyma.06G033200	100782659	uncharacterized LOC100782659	Down	gmx:100782659	uncharacterized protein LOC100782659 isoform X1
Glyma.17G194600	NA	NA	Down	NA	NA
Glyma.13G275500	100808113	protein DETOXIFICATION 18	Down	gmx:100808113	protein DETOXIFICATION 18
Glyma.05G081900	100801175	serine/threonine-protein kinase SAPK10	Down	gmx:100801175	serine/threonine-protein kinase SAPK10
Glyma.11G210500	NA	NA	Down	NA	NA
Glyma.09G053900	NA	NA	Down	NA	NA
Glyma.05G016700	100803122	inorganic pyrophosphatase TTM1	Down	gmx:100803122	inorganic pyrophosphatase TTM1
Glyma.04G233200	100800980	Yippee family putative zinc-binding protein	Down	gmx:100800980	yippee family putative zinc-binding protein
Glyma.02G021900	100812482	uncharacterized LOC100812482	Down	gmx:100812482	uncharacterized protein LOC100812482 isoform X1
Glyma.05G067100	100789357	putative casein kinase II subunit beta	Down	gmx:100789357	putative casein kinase II subunit beta isoform 1
Glyma.03G138700	NA	NA	Down	NA	NA
Glyma.18G022800	100779520	uncharacterized LOC100779520	Down	gmx:100779520	uncharacterized protein LOC100779520
Glyma.16G177300	100781797	pentatricopeptide repeat-containing protein At4g21190	Down	gmx:100781797	pentatricopeptide repeat-containing protein At4g21190
Glyma.05G103900	100818607	uncharacterized LOC100818607	Down	gmx:100818607	uncharacterized protein LOC100818607
Glyma.18G213400	100807514	vacuolar-sorting receptor 1	Down	gmx:100807514	vacuolar-sorting receptor 1
Glyma.09G275300	100814602	RING-H2 finger protein ATL74	Down	gmx:100814602	RING-H2 finger protein ATL74
Glyma.13G236200	100305820	uncharacterized LOC100305820	Down	gmx:100305820	uncharacterized protein LOC100305820
Glyma.05G074800	100797268	ribulose-1,5 bisphosphate carboxylase/oxygenase large subunit N-methyltransferase, chloroplastic	Down	gmx:100797268	ribulose-1,5 bisphosphate carboxylase/oxygenase large subunit N-methyltransferase, chloroplastic
Glyma.03G235600	100808937	tafazzin	Down	gmx:100808937	tafazzin
Glyma.05G155400	100800626	uncharacterized LOC100800626	Down	gmx:100800626	uncharacterized protein LOC100800626
Glyma.11G117500	NA	NA	Down	NA	NA
Glyma.09G168500	100794895	probable cyclic nucleotide-gated ion channel 20, chloroplastic	Down	gmx:100794895	probable cyclic nucleotide-gated ion channel 20, chloroplastic isoform X1
Glyma.03G070200	100780597	2-oxoisovalerate dehydrogenase subunit beta 1, mitochondrial	Down	gmx:100780597	2-oxoisovalerate dehydrogenase subunit beta 1, mitochondrial
Glyma.07G142300	100808666	C4HC3 zinc-finger like motif-containing protein	Down	gmx:100808666	C4HC3 zinc-finger like motif-containing protein
Glyma.17G041600	NA	NA	Down	NA	NA
Glyma.19G173300	100783136	uncharacterized LOC100783136	Down	gmx:100783136	uncharacterized protein LOC100783136
Glyma.02G136600	NA	NA	Down	NA	NA
Glyma.11G210400	NA	NA	Down	NA	NA
Glyma.14G022200	100500642	uncharacterized LOC100500642	Down	gmx:100500642	uncharacterized protein LOC100500642
Glyma.20G142000	100794288	thiamine thiazole synthase 2, chloroplastic	Down	gmx:100794288	thiamine thiazole synthase 2, chloroplastic
Glyma.17G129000	100816209	uridine kinase-like protein 1, chloroplastic	Down	gmx:100816209	uridine kinase-like protein 1, chloroplastic isoform X2
Glyma.09G064700	100800032	BTB/POZ domain and ankyrin repeat-containing protein NPR1	Down	gmx:100800032	LOW QUALITY PROTEIN: BTB/POZ domain and ankyrin repeat-containing protein NPR1
Glyma.10G189300	100810720	cellulose synthase-like protein G2	Down	gmx:100810720	cellulose synthase-like protein G2
Glyma.20G060300	100797826	long chain acyl-CoA synthetase 8	Down	gmx:100797826	long chain acyl-CoA synthetase 8
Glyma.03G260200	100777218	CBL-interacting serine/threonine-protein kinase 9	Down	gmx:100777218	CBL-interacting serine/threonine-protein kinase 9 isoform X1
Glyma.08G217900	100527580	uncharacterized LOC100527580	Down	gmx:100527580	uncharacterized protein LOC100527580 isoform X1
Glyma.13G329300	100776572	DDB1- and CUL4-associated factor 8	Down	gmx:100776572	DDB1- and CUL4-associated factor 8 isoform X1
Glyma.02G014200	100778080	CTP synthase	Down	gmx:100778080	CTP synthase isoform X1
Glyma.03G074700	100500402	uncharacterized LOC100500402	Down	gmx:100500402	uncharacterized protein LOC100500402
Glyma.17G259000	100820475	synaptotagmin-2	Down	gmx:100820475	synaptotagmin-2 isoform X1
Glyma.10G288500	NA	NA	Down	NA	NA
Glyma.13G074700	100788855	vacuolar protein sorting-associated protein 26-like	Down	gmx:100788855	uncharacterized protein LOC100788855
Glyma.04G027600	100779565	cysteine proteinase 15A	Down	gmx:100779565	cysteine proteinase 15A
Glyma.09G129400	100809627	pentatricopeptide repeat-containing protein At4g21190	Down	gmx:100809627	pentatricopeptide repeat-containing protein At4g21190
Glyma.07G239200	NA	NA	Down	NA	NA
Glyma.09G144800	100778953	1-aminocyclopropane-1-carboxylate oxidase homolog 1	Down	gmx:100778953	1-aminocyclopropane-1-carboxylate oxidase homolog 1
Glyma.07G260800	NA	NA	Down	NA	NA
Glyma.08G197100	100790664	IAA-amino acid hydrolase ILR1-like	Down	gmx:100790664	IAA-amino acid hydrolase ILR1-like precursor
Glyma.15G219300	100803177	E3 ubiquitin-protein ligase RGLG4	Down	gmx:100803177	E3 ubiquitin-protein ligase RGLG4 isoform X1
Glyma.11G151700	100801691	xanthoxin dehydrogenase	Down	gmx:100801691	xanthoxin dehydrogenase
Glyma.17G022700	100805161	tubby-like F-box protein 3-like	Down	gmx:100805161	uncharacterized protein LOC100805161
Glyma.15G276400	100798399	primary amine oxidase	Down	gmx:100798399	primary amine oxidase
Glyma.04G222300	NA	NA	Down	NA	NA
Glyma.18G050700	100786467	probable LRR receptor-like serine/threonine-protein kinase At1g06840	Down	gmx:100786467	probable LRR receptor-like serine/threonine-protein kinase At1g06840
Glyma.01G185400	548057	cyclin-dependent kinase inhibitor 1-2	Down	gmx:548057	cyclin-dependent kinase inhibitor 1-2
Glyma.14G017900	100804747	putative BPI/LBP family protein At1g04970	Down	gmx:100804747	putative BPI/LBP family protein At1g04970
Glyma.07G033300	100794338	pentatricopeptide repeat-containing protein At1g15510, chloroplastic	Down	gmx:100794338	pentatricopeptide repeat-containing protein At1g15510, chloroplastic
Glyma.19G040900	100788814	probable isoprenylcysteine alpha-carbonyl methylesterase ICMEL2	Down	gmx:100788814	probable isoprenylcysteine alpha-carbonyl methylesterase ICMEL2
Glyma.13G333300	100779601	methyl-CpG-binding domain-containing protein 7-like	Down	gmx:100779601	uncharacterized protein LOC100779601
Glyma.02G230900	100814618	UDP-glycosyltransferase 87A1	Down	gmx:100814618	UDP-glycosyltransferase 87A1
Glyma.20G005600	100796043	peptidyl-prolyl cis-trans isomerase CYP61	Down	gmx:100796043	CYP61; peptidyl-prolyl cis-trans isomerase CYP21-4
Glyma.06G185300	100789576	gibberellin-regulated protein 10	Down	gmx:100789576	GASA10; snakin-2
Glyma.10G147700	100305594	USP domain-containing protein	Down	gmx:100305594	USP domain-containing protein
Glyma.13G108600	100306717	uncharacterized LOC100306717	Down	gmx:100306717	uncharacterized protein LOC100306717
Glyma.15G217700	100800510	uncharacterized LOC100800510	Down	gmx:100800510	uncharacterized protein LOC100800510
Glyma.05G197600	100803481	ferrochelatase-2, chloroplastic	Down	gmx:100803481	ferrochelatase-2, chloroplastic isoform X1
Glyma.06G253700	100813477	transmembrane protein 184C	Down	gmx:100813477	transmembrane protein 184C isoform X4
Glyma.11G165600	100805754	gamma-interferon-responsive lysosomal thiol protein	Down	gmx:100805754	gamma-interferon-responsive lysosomal thiol protein
Glyma.18G182500	100801824	scarecrow-like protein 9	Down	gmx:100801824	scarecrow-like protein 9
Glyma.02G204800	NA	NA	Down	NA	NA
Glyma.04G235600	100810042	CLP protease regulatory subunit CLPX1, mitochondrial	Down	gmx:100810042	CLP protease regulatory subunit CLPX1, mitochondrial isoform X1
Glyma.04G067500	NA	NA	Down	NA	NA
Glyma.09G066500	100803764	protein phosphatase 2C 53	Down	gmx:100803764	protein phosphatase 2C 53
Glyma.01G177400	100808533	G-box-binding factor 1	Down	gmx:100808533	G-box-binding factor 1 isoform X3
Glyma.03G151300	100798474	CSC1-like protein At4g02900	Down	gmx:100798474	CSC1-like protein At4g02900 isoform X2
Glyma.17G202700	100803569	probable E3 ubiquitin-protein ligase RZFP34	Down	gmx:100803569	probable E3 ubiquitin-protein ligase RZFP34
Glyma.13G045000	100818957	plastidic glucose transporter 4	Down	gmx:100818957	plastidic glucose transporter 4
Glyma.09G283400	100783616	chaperone protein dnaJ C76, chloroplastic	Down	gmx:100783616	chaperone protein dnaJ C76, chloroplastic
Glyma.13G258300	102670394	uncharacterized LOC102670394	Down	gmx:102670394	uncharacterized protein LOC102670394
Glyma.10G284300	102665658	mechanosensitive ion channel protein 6	Down	gmx:102665658	mechanosensitive ion channel protein 6
Glyma.16G147900	100779123	uncharacterized LOC100779123	Down	gmx:100779123	uncharacterized protein LOC100779123 isoform X1
Glyma.02G150200	100792646	piezo-type mechanosensitive ion channel homolog	Down	gmx:100792646	piezo-type mechanosensitive ion channel homolog isoform X1
Glyma.02G069400	100787087	shaggy-related protein kinase eta	Down	gmx:100787087	shaggy-related protein kinase eta
Glyma.18G158800	100783278	uncharacterized LOC100783278	Down	gmx:100783278	uncharacterized protein LOC100783278 isoform X1
Glyma.13G231400	100818440	GDSL esterase/lipase At1g28610	Down	gmx:100818440	GDSL esterase/lipase At1g28610
Glyma.11G131200	100789855	transcription factor bHLH122	Down	gmx:100789855	transcription factor bHLH122
Glyma.01G069500	100796464	ruBisCO large subunit-binding protein subunit beta, chloroplastic	Down	gmx:100796464	ruBisCO large subunit-binding protein subunit beta, chloroplastic isoform X1
Glyma.08G268900	100781421	putative phospholipid-transporting ATPase 9	Down	gmx:100781421	putative phospholipid-transporting ATPase 9
Glyma.06G127700	NA	NA	Down	NA	NA
Glyma.19G099700	100786838	zinc finger protein CONSTANS-LIKE 14-like	Down	gmx:100786838	COL17; zinc finger protein CONSTANS-LIKE 14-like
Glyma.20G046400	NA	NA	Down	NA	NA
Glyma.05G155600	NA	NA	Down	NA	NA
Glyma.12G158600	100801346	homogentisate 1,2-dioxygenase	Down	gmx:100801346	HGO1; homogentisate 1,2-dioxygenase
Glyma.12G193000	100792353	arogenate dehydratase/prephenate dehydratase 1, chloroplastic	Down	gmx:100792353	arogenate dehydratase/prephenate dehydratase 1, chloroplastic
Glyma.06G047400	100801015	serine carboxypeptidase-like 11	Down	gmx:100801015	serine carboxypeptidase-like 7 isoform X4
Glyma.12G214300	100811126	uncharacterized LOC100811126	Down	gmx:100811126	uncharacterized protein LOC100811126
Glyma.06G069100	100306315	uncharacterized LOC100306315	Down	gmx:100306315	uncharacterized protein LOC100306315
Glyma.13G353400	100796769	ATP-dependent 6-phosphofructokinase 3	Down	gmx:100796769	ATP-dependent 6-phosphofructokinase 3
Glyma.01G206500	100788734	G-type lectin S-receptor-like serine/threonine-protein kinase LECRK3	Down	gmx:100788734	G-type lectin S-receptor-like serine/threonine-protein kinase LECRK3
Glyma.17G128500	100814619	ribonuclease J	Down	gmx:100814619	ribonuclease J isoform X1
Glyma.16G002700	NA	NA	Down	NA	NA
Glyma.06G130200	100782455	uncharacterized LOC100782455	Down	gmx:100782455	uncharacterized protein LOC100782455 isoform X1
Glyma.16G112200	100813341	RING-H2 finger protein ATL8	Down	gmx:100813341	RING-H2 finger protein ATL8
Glyma.07G251800	100794141	tubby-like F-box protein 3	Down	gmx:100794141	tubby-like F-box protein 3
Glyma.05G233400	100813638	aluminum-activated malate transporter 9	Down	gmx:100813638	ALMT9; aluminum-activated malate transporter 9
Glyma.01G192100	100813528	casein kinase II subunit alpha-2	Down	gmx:100813528	casein kinase II subunit alpha-2
Glyma.08G248900	100814046	receptor-like protein kinase FERONIA	Down	gmx:100814046	receptor-like protein kinase FERONIA
Glyma.06G094300	100818441	glucose-6-phosphate isomerase 1, chloroplastic	Down	gmx:100818441	glucose-6-phosphate isomerase 1, chloroplastic
Glyma.05G159400	100810237	shaggy-related protein kinase eta	Down	gmx:100810237	shaggy-related protein kinase eta isoform X1
Glyma.10G251500	100788953	thiamine thiazole synthase 2, chloroplastic	Down	gmx:100788953	thiamine thiazole synthase 2, chloroplastic
Glyma.13G298700	100810417	uncharacterized LOC100810417	Down	gmx:100810417	uncharacterized protein LOC100810417 isoform X1
Glyma.12G130000	100812547	chaperone protein dnaJ C76, chloroplastic	Down	gmx:100812547	chaperone protein dnaJ C76, chloroplastic
Glyma.18G020900	100793353	bZIP transcription factor	Down	gmx:100793353	TGA23; bZIP transcription factor
Glyma.05G202000	100789359	probable serine/threonine-protein kinase At1g54610	Down	gmx:100789359	probable serine/threonine-protein kinase At1g54610
Glyma.07G077700	100797322	uncharacterized LOC100797322	Down	gmx:100797322	uncharacterized protein LOC100797322
Glyma.17G039600	NA	NA	Down	NA	NA
Glyma.04G050200	100793561	protein EARLY FLOWERING 3a	Down	gmx:100793561	ELF3A; protein EARLY FLOWERING 3
Glyma.20G126800	100801168	cyclase-like protein 2	Down	gmx:100801168	cyclase-like protein 2
Glyma.02G131500	100791763	methylcrotonoyl-CoA carboxylase beta chain, mitochondrial	Down	gmx:100791763	methylcrotonoyl-CoA carboxylase beta chain, mitochondrial isoform X1
Glyma.13G217400	100787616	cytochrome P450 710A1	Down	gmx:100787616	cytochrome P450 710A1
Glyma.15G068800	100776247	PAP-specific phosphatase HAL2-like	Down	gmx:100776247	PAP-specific phosphatase HAL2-like
Glyma.06G136600	100777119	two-component response regulator-like PRR95	Down	gmx:100777119	two-component response regulator-like PRR95
Glyma.14G208300	100783736	probable acyl-activating enzyme 6	Down	gmx:100783736	probable acyl-activating enzyme 6
Glyma.20G031100	100790074	chalcone reductase CHR4	Down	gmx:100790074	CHR4; chalcone reductase CHR4
Glyma.03G111300	100792843	transcription factor bZIP22	Down	gmx:100792843	BZIP22; nitrate regulatory gene2 protein
Glyma.14G056200	100800134	dehydration-responsive element-binding protein 2A2	Down	gmx:100800134	DREB2A2; dehydration-responsive element-binding protein 2A2
Glyma.05G173400	100790415	glycosyl hydrolase 5 family protein	Down	gmx:100790415	glycosyl hydrolase 5 family protein
Glyma.20G167500	732594	abscisic stress ripening-like protein	Down	gmx:732594	abscisic stress ripening-like protein
Glyma.15G011500	100775892	ADP,ATP carrier protein 1, chloroplastic	Down	gmx:100775892	ADP,ATP carrier protein 1, chloroplastic
Glyma.11G155300	100810893	uncharacterized LOC100810893	Down	gmx:100810893	uncharacterized protein LOC100810893
Glyma.01G043600	100500581	uncharacterized LOC100500581	Down	gmx:100500581	uncharacterized protein LOC100500581
Glyma.10G148400	NA	NA	Down	NA	NA
Glyma.20G054100	100782277	linoleate 13S-lipoxygenase 2-1, chloroplastic	Down	gmx:100782277	linoleate 13S-lipoxygenase 2-1, chloroplastic
Glyma.07G166400	100810981	probable NAD(P)H dehydrogenase subunit CRR3, chloroplastic	Down	gmx:100810981	probable NAD(P)H dehydrogenase subunit CRR3, chloroplastic
Glyma.15G178400	100811186	aldehyde dehydrogenase family 7 member B2	Down	gmx:100811186	ALDH7B2; aldehyde dehydrogenase family 7 member A1
Glyma.20G179800	100816118	uncharacterized LOC100816118	Down	gmx:100816118	uncharacterized protein LOC100816118
Glyma.04G079600	100799031	BURP domain protein RD22	Down	gmx:100799031	BURP domain protein RD22
Glyma.02G126300	100785937	ruBisCO large subunit-binding protein subunit beta, chloroplastic	Down	gmx:100785937	ruBisCO large subunit-binding protein subunit beta, chloroplastic isoform X1
Glyma.19G156800	NA	NA	Down	NA	NA
Glyma.06G304900	100792211	septum-promoting GTP-binding protein 1	Down	gmx:100792211	septum-promoting GTP-binding protein 1
Glyma.17G093400	100794737	protein JINGUBANG	Down	gmx:100794737	protein JINGUBANG
Glyma.02G112100	100799335	probable WRKY transcription factor 4	Down	gmx:100799335	probable WRKY transcription factor 4
Glyma.03G256200	100777944	jasmonoyl--L-amino acid synthetase JAR4	Down	gmx:100777944	jasmonoyl--L-amino acid synthetase JAR4
Glyma.01G106700	100808693	copper transporter 2	Down	gmx:100808693	copper transporter 2
Glyma.06G128100	100776216	2-oxoglutarate-dependent dioxygenase 19	Down	gmx:100776216	2-oxoglutarate-dependent dioxygenase 19
Glyma.13G275400	100816310	protein DETOXIFICATION 19	Down	gmx:100816310	protein DETOXIFICATION 19
Glyma.17G161400	100803578	formin-like protein 6	Down	gmx:100803578	formin-like protein 6
Glyma.11G087500	100786840	MLO-like protein 10	Down	gmx:100786840	MLO-like protein 10
Glyma.17G258800	100787853	uncharacterized LOC100787853	Down	gmx:100787853	uncharacterized protein LOC100787853
Glyma.U034800	NA	NA	Down	NA	NA
Glyma.09G272300	100809775	probable LRR receptor-like serine/threonine-protein kinase At1g06840	Down	gmx:100809775	probable LRR receptor-like serine/threonine-protein kinase At1g06840 isoform X1
Glyma.11G117400	100305467	putative glycine-rich RNA binding protein	Down	gmx:100305467	putative glycine-rich RNA binding protein
Glyma.U034500	NA	NA	Down	NA	NA
Glyma.19G124500	100787207	alpha-L-arabinofuranosidase 1	Down	gmx:100787207	alpha-L-arabinofuranosidase 1
Glyma.15G251900	548030	glutathione S-transferase GST 16	Down	gmx:548030	glutathione S-transferase GST 16
Glyma.20G015100	100780822	serine carboxypeptidase-like 50	Down	gmx:100780822	serine carboxypeptidase-like 50
Glyma.11G077800	100802906	thaumatin-like protein 1	Down	gmx:100802906	thaumatin-like protein 1
Glyma.02G277500	100816922	transcription initiation factor TFIID subunit 9	Down	gmx:100816922	transcription initiation factor TFIID subunit 9
Glyma.08G225000	100777341	probable mitochondrial adenine nucleotide transporter BTL1	Down	gmx:100777341	probable mitochondrial adenine nucleotide transporter BTL1
Glyma.04G222500	100809314	uncharacterized LOC100809314	Down	gmx:100809314	uncharacterized protein LOC100809314
Glyma.19G212800	100802045	sucrose synthase 2	Down	gmx:100802045	sucrose synthase 2 isoform X2
Glyma.17G094400	780536	MYB transcription factor MYB173	Down	gmx:780536	MYB175; MYB transcription factor MYB173
Glyma.16G088400	100804253	UV-B-induced protein At3g17800, chloroplastic	Down	gmx:100804253	UV-B-induced protein At3g17800, chloroplastic
Glyma.09G000600	100778602	zeaxanthin epoxidase, chloroplastic	Down	gmx:100778602	zeaxanthin epoxidase, chloroplastic isoform X1
Glyma.08G252400	100790667	pentatricopeptide repeat-containing protein At3g46790, chloroplastic	Down	gmx:100790667	pentatricopeptide repeat-containing protein At3g46790, chloroplastic
Glyma.04G012700	100806292	glycine-rich RNA-binding protein GRP1A	Down	gmx:100806292	glycine-rich RNA-binding protein GRP1A
Glyma.01G018000	100305951	hypothetical protein	Down	gmx:100305951	uncharacterized protein LOC100305951
Glyma.17G145100	100815507	nudix hydrolase superfamily protein	Down	gmx:100815507	nudix hydrolase superfamily protein
Glyma.08G196800	100789077	IAA-amino acid hydrolase ILR1-like 4	Down	gmx:100789077	IAA-amino acid hydrolase ILR1-like 4 isoform X1
Glyma.20G109800	NA	NA	Down	NA	NA
Glyma.08G067600	100814228	cysteine hydrolases superfamily protein	Down	gmx:100814228	cysteine hydrolases superfamily protein
Glyma.16G027200	100802144	protein SUPPRESSOR OF PHYA-105 1	Down	gmx:100802144	protein SUPPRESSOR OF PHYA-105 1
Glyma.08G140500	100796116	cytochrome P450 71AU50	Down	gmx:100796116	cytochrome P450 71AU50
Glyma.17G194500	100819779	protein NRT1/ PTR FAMILY 1.2	Down	gmx:100819779	protein NRT1/ PTR FAMILY 1.2 isoform X1
Glyma.19G242300	100794958	cysteine synthase-like	Down	gmx:100794958	cysteine synthase-like
Glyma.02G239500	100779857	probable acyl-activating enzyme 5, peroxisomal	Down	gmx:100779857	probable acyl-activating enzyme 5, peroxisomal
Glyma.16G177800	100782877	uncharacterized LOC100782877	Down	gmx:100782877	uncharacterized protein LOC100782877
Glyma.02G299100	100820316	serine acetyltransferase 1, chloroplastic	Down	gmx:100820316	serine acetyltransferase 1, chloroplastic
Glyma.13G159700	NA	NA	Down	NA	NA
Glyma.07G089300	100794138	strigolactone esterase D14	Down	gmx:100794138	strigolactone esterase D14
Glyma.14G211700	100792223	hydroxyisourate hydrolase	Down	gmx:100792223	hydroxyisourate hydrolase
Glyma.06G301500	547931	beta-amylase	Down	gmx:547931	BMY1; beta-amylase
Glyma.13G266300	121173337	probable LRR receptor-like serine/threonine-protein kinase At1g53430	Down	gmx:121173337	probable LRR receptor-like serine/threonine-protein kinase At1g53430
Glyma.05G182100	100500548	uncharacterized LOC100500548	Down	gmx:100500548	uncharacterized protein LOC100500548
Glyma.07G029900	100818459	protein POST-ILLUMINATION CHLOROPHYLL FLUORESCENCE INCREASE, chloroplastic	Down	gmx:100818459	protein POST-ILLUMINATION CHLOROPHYLL FLUORESCENCE INCREASE, chloroplastic
Glyma.05G151300	100813286	selenium-binding protein 2	Down	gmx:100813286	selenium-binding protein 2
Glyma.18G188800	100783806	protein RETICULATA, chloroplastic	Down	gmx:100783806	protein RETICULATA, chloroplastic
Glyma.01G221500	100800542	homeobox protein BEL1 homolog	Down	gmx:100800542	homeobox protein BEL1 homolog
Glyma.16G153000	100775728	uncharacterized LOC100775728	Down	gmx:100775728	uncharacterized protein LOC100775728
Glyma.19G229700	548049	DnaJ-like protein	Down	gmx:548049	DnaJ-like protein isoform 1
Glyma.06G314500	100812218	protein argonaute 4B	Down	gmx:100812218	protein argonaute 4B
Glyma.17G061500	100500633	uncharacterized LOC100500633	Down	gmx:100500633	uncharacterized protein LOC100500633
Glyma.03G231700	100527623	uncharacterized LOC100527623	Down	gmx:100527623	uncharacterized protein LOC100527623
Glyma.18G128200	100810206	uncharacterized LOC100810206	Down	gmx:100810206	uncharacterized protein LOC100810206
Glyma.05G199000	100810067	putative amidase AmiD	Down	gmx:100810067	putative amidase AmiD isoform X2
Glyma.15G177800	100170694	putative cysteine protease	Down	gmx:100170694	putative cysteine protease precursor
Glyma.19G159500	100794264	heat stress transcription factor A-7a	Down	gmx:100794264	heat stress transcription factor A-7a
Glyma.20G015400	102663282	serine carboxypeptidase-like 50	Down	gmx:102663282	serine carboxypeptidase-like 50
Glyma.20G023100	100806316	pentatricopeptide repeat-containing protein At4g18520, chloroplastic	Down	gmx:100806316	pentatricopeptide repeat-containing protein At4g18520, chloroplastic isoform X1
Glyma.19G144100	100796011	receptor protein kinase-like protein ZAR1	Down	gmx:100796011	receptor protein kinase-like protein ZAR1
Glyma.11G089300	100792133	2-oxoglutarate-dependent dioxygenase DAO	Down	gmx:100792133	2-oxoglutarate-dependent dioxygenase DAO
Glyma.20G157100	100787756	3-hexulose-6-phosphate isomerase	Down	gmx:100787756	3-hexulose-6-phosphate isomerase
Glyma.03G137900	100807861	probable galactinol--sucrose galactosyltransferase 2	Down	gmx:100807861	probable galactinol--sucrose galactosyltransferase 2
Glyma.11G149900	100306232	uncharacterized LOC100306232	Down	gmx:100306232	uncharacterized protein LOC100306232
Glyma.20G140000	102669459	cysteine-rich repeat secretory protein 38	Down	gmx:102669459	cysteine-rich repeat secretory protein 38
Glyma.11G117600	100796704	RNA recognition motif-containing protein	Down	gmx:100796704	RNA recognition motif-containing protein
Glyma.18G298500	100812497	heparan-alpha-glucosaminide N-acetyltransferase	Down	gmx:100812497	heparan-alpha-glucosaminide N-acetyltransferase
Glyma.16G115800	100818670	diacylglycerol O-acyltransferase 2D-like	Down	gmx:100818670	diacylglycerol O-acyltransferase 2D-like isoform X1
Glyma.08G336100	100783048	uncharacterized LOC100783048	Down	gmx:100783048	uncharacterized protein LOC100783048
Glyma.16G163200	100781641	protein GIGANTEA	Down	gmx:100781641	protein GIGANTEA
Glyma.04G138600	100306185	uncharacterized LOC100306185	Down	gmx:100306185	uncharacterized protein LOC100306185
Glyma.01G161500	100305968	rhodanese-like domain-containing protein	Down	gmx:100305968	uncharacterized protein LOC100305968
Glyma.11G055700	100820171	zeaxanthin epoxidase, chloroplastic-like	Down	gmx:100820171	zeaxanthin epoxidase, chloroplastic-like
Glyma.08G143500	100788719	neutral/alkaline invertase 3, chloroplastic	Down	gmx:100788719	neutral/alkaline invertase 3, chloroplastic
Glyma.13G165800	100784254	uncharacterized LOC100784254	Down	gmx:100784254	uncharacterized protein LOC100784254
Glyma.09G033500	NA	NA	Down	NA	NA
Glyma.18G142500	100788421	alpha-glucan water dikinase, chloroplastic	Down	gmx:100788421	alpha-glucan water dikinase, chloroplastic
Glyma.13G110600	NA	NA	Down	NA	NA
Glyma.09G009500	100811241	cationic amino acid transporter 8, vacuolar	Down	gmx:100811241	cationic amino acid transporter 8, vacuolar
Glyma.18G050500	NA	NA	Down	NA	NA
Glyma.19G113000	100796371	tubulin alpha-6 chain	Down	gmx:100796371	tubulin alpha-6 chain
Glyma.18G067500	100811254	uncharacterized LOC100811254	Down	gmx:100811254	uncharacterized protein LOC100811254
Glyma.02G111300	NA	NA	Down	NA	NA
Glyma.08G117200	100812801	shaggy-related protein kinase eta	Down	gmx:100812801	shaggy-related protein kinase eta isoform X1
Glyma.04G021200	100776003	E3 ubiquitin-protein ligase ATL23	Down	gmx:100776003	E3 ubiquitin-protein ligase ATL23
Glyma.07G197600	100812414	chaperone protein dnaJ C76, chloroplastic	Down	gmx:100812414	chaperone protein dnaJ C76, chloroplastic
Glyma.14G197000	100779427	probable inactive receptor-like protein kinase At3g56050	Down	gmx:100779427	probable inactive receptor-like protein kinase At3g56050
Glyma.11G130300	100787202	linoleate 13S-lipoxygenase 2-1, chloroplastic	Down	gmx:100787202	linoleate 13S-lipoxygenase 2-1, chloroplastic
Glyma.07G240900	113002203	uncharacterized LOC113002203	Down	gmx:113002203	uncharacterized protein LOC113002203
Glyma.10G051800	100811800	uncharacterized LOC100811800	Down	gmx:100811800	uncharacterized protein LOC100811800 isoform X1
Glyma.13G145300	NA	NA	Down	NA	NA
Glyma.03G205400	100803077	probable carboxylesterase 15	Down	gmx:100803077	probable carboxylesterase 15
Glyma.08G120200	100794883	aquaporin NIP1-2	Down	gmx:100794883	NIP1-2; nodulin-26
Glyma.02G223700	100787695	zinc finger protein CONSTANS-LIKE 9	Down	gmx:100787695	zinc finger protein CONSTANS-LIKE 9
Glyma.04G104400	100777065	phosphatidylinositol transfer protein 3	Down	gmx:100777065	phosphatidylinositol transfer protein 3 isoform X2
Glyma.16G004500	NA	NA	Down	NA	NA
Glyma.15G073100	100798222	stem-specific protein TSJT1	Down	gmx:100798222	stem-specific protein TSJT1
Glyma.08G213000	100790141	uncharacterized LOC100790141	Down	gmx:100790141	uncharacterized protein LOC100790141
Glyma.11G192900	100812709	E3 ubiquitin-protein ligase RZFP34	Down	gmx:100812709	E3 ubiquitin-protein ligase RZFP34
Glyma.12G099700	100780638	septum-promoting GTP-binding protein 1	Down	gmx:100780638	septum-promoting GTP-binding protein 1
Glyma.10G061800	100780217	thaumatin-like protein 1b	Down	gmx:100780217	thaumatin-like protein 1b
Glyma.04G236600	100809306	probable plastid-lipid-associated protein 14, chloroplastic	Down	gmx:100809306	probable plastid-lipid-associated protein 14, chloroplastic
Glyma.08G339700	100805667	WAT1-related protein At4g15540	Down	gmx:100805667	WAT1-related protein At4g15540 isoform X1
Glyma.13G118400	100798183	protein CHUP1, chloroplastic	Down	gmx:100798183	protein CHUP1, chloroplastic isoform X1
Glyma.05G152500	100819144	HXXXD-type acyl-transferase family protein	Down	gmx:100819144	HXXXD-type acyl-transferase family protein
Glyma.11G136600	100802217	transcription factor LUXc	Down	gmx:100802217	LUXC; transcription factor LUXc
Glyma.09G069800	547734	pro-cathepsin H	Down	gmx:547734	pro-cathepsin H isoform X1
Glyma.01G144700	100800538	protein LITTLE ZIPPER 2-like	Down	gmx:100800538	ZPR1D; protein LITTLE ZIPPER 2-like
Glyma.02G136000	100807298	gibberellin 20 oxidase 1-like	Down	gmx:100807298	uncharacterized protein LOC100807298
Glyma.16G040100	100784487	tubulin alpha-3 chain	Down	gmx:100784487	tubulin alpha-3 chain
Glyma.19G011600	100791805	WAT1-related protein At3g28050	Down	gmx:100791805	WAT1-related protein At3g28050 isoform X2
Glyma.15G257600	102659833	1-aminocyclopropane-1-carboxylate oxidase homolog 1	Down	gmx:102659833	1-aminocyclopropane-1-carboxylate oxidase homolog 1
Glyma.05G200400	100793052	trihelix transcription factor ASR3	Down	gmx:100793052	trihelix transcription factor ASR3
Glyma.06G123800	100805630	pathogen-related protein-like	Down	gmx:100805630	pathogen-related protein-like
Glyma.18G134600	100775407	gluconokinase	Down	gmx:100775407	gluconokinase
Glyma.11G176200	100786478	phosphomethylpyrimidine synthase, chloroplastic	Down	gmx:100786478	phosphomethylpyrimidine synthase, chloroplastic
Glyma.01G052700	100789803	uncharacterized LOC100789803	Down	gmx:100789803	uncharacterized protein LOC100789803
Glyma.01G054500	100780534	chorismate mutase 3, chloroplastic	Down	gmx:100780534	chorismate mutase 3, chloroplastic isoform X1
Glyma.07G077400	100813493	probable methyltransferase PMT15	Down	gmx:100813493	probable methyltransferase PMT15
Glyma.14G197900	NA	NA	Down	NA	NA
Glyma.12G150400	NA	NA	Down	NA	NA
Glyma.15G041400	100788888	uncharacterized LOC100788888	Down	gmx:100788888	uncharacterized protein LOC100788888
Glyma.14G010500	100785506	probable galactinol--sucrose galactosyltransferase 1	Down	gmx:100785506	probable galactinol--sucrose galactosyltransferase 1
Glyma.04G050300	100811289	zinc finger CCCH domain-containing protein 23	Down	gmx:100811289	zinc finger CCCH domain-containing protein 23
Glyma.17G253100	NA	NA	Down	NA	NA
Glyma.12G043100	100813633	mTERF domain-containing protein	Down	gmx:100813633	mTERF domain-containing protein
Glyma.17G165200	547711	ferrous ion membrane transport protein DMT1	Down	gmx:547711	DMT1; ferrous ion membrane transport protein DMT1
Glyma.03G085900	100793365	UV-B-induced protein At3g17800, chloroplastic	Down	gmx:100793365	UV-B-induced protein At3g17800, chloroplastic
Glyma.16G050900	100801439	zinc finger protein CONSTANS-LIKE 15	Down	gmx:100801439	COL16; zinc finger protein CONSTANS-LIKE 15
Glyma.20G060400	100796748	zinc finger protein CONSTANS-LIKE 9	Down	gmx:100796748	zinc finger protein CONSTANS-LIKE 9
Glyma.07G269400	NA	NA	Down	NA	NA
Glyma.03G030900	100801855	cytochrome P450 83B1	Down	gmx:100801855	cytochrome P450 83B1
Glyma.07G126200	100777131	glutathione hydrolase 3	Down	gmx:100777131	glutathione hydrolase 3 isoform X1
Glyma.13G365300	100785496	uncharacterized LOC100785496	Down	gmx:100785496	uncharacterized protein LOC100785496
Glyma.01G154900	100777875	probable carotenoid cleavage dioxygenase 4, chloroplastic	Down	gmx:100777875	probable carotenoid cleavage dioxygenase 4, chloroplastic
Glyma.08G334000	100789789	alpha-glucan phosphorylase, H isozyme	Down	gmx:100789789	alpha-glucan phosphorylase, H isozyme
Glyma.01G170500	NA	NA	Down	NA	NA
Glyma.14G032000	NA	NA	Down	NA	NA
Glyma.06G247100	100804565	protochlorophyllide reductase, chloroplastic	Down	gmx:100804565	protochlorophyllide reductase, chloroplastic
Glyma.10G233700	100800742	uncharacterized LOC100800742	Down	gmx:100800742	uncharacterized protein LOC100800742
Glyma.08G089400	100784120	isoflavone 3'-hydroxylase	Down	gmx:100784120	isoflavone 3'-hydroxylase
Glyma.14G061300	100781766	uncharacterized LOC100781766	Down	gmx:100781766	uncharacterized protein LOC100781766 isoform X1
Glyma.10G038300	NA	NA	Down	NA	NA
Glyma.04G228300	100784383	two-component response regulator-like APRR9	Down	gmx:100784383	two-component response regulator-like APRR9 isoform X2
Glyma.09G110700	100790353	probable L-type lectin-domain containing receptor kinase S.5	Down	gmx:100790353	probable L-type lectin-domain containing receptor kinase S.5
Glyma.08G357400	100794698	LRR receptor-like serine/threonine-protein kinase RGI2	Down	gmx:100794698	LRR receptor-like serine/threonine-protein kinase RGI2
Glyma.12G008400	102668481	uncharacterized LOC102668481	Down	gmx:102668481	uncharacterized protein LOC102668481
Glyma.12G191700	100780817	cellulose synthase-like protein B5	Down	gmx:100780817	cellulose synthase-like protein H1 isoform X1
Glyma.06G050300	100786368	zinc finger CCCH domain-containing protein	Down	gmx:100786368	zinc finger CCCH domain-containing protein
Glyma.03G022800	100778642	calmodulin	Down	gmx:100778642	calmodulin
Glyma.02G286200	NA	NA	Down	NA	NA
Glyma.12G224300	100791650	uncharacterized LOC100791650	Down	gmx:100791650	uncharacterized protein LOC100791650
Glyma.16G182400	100797708	protein NLP7	Down	gmx:100797708	protein NLP7
Glyma.17G163200	100819937	peroxidase 50	Down	gmx:100819937	peroxidase 50
Glyma.07G121500	100790115	very-long-chain aldehyde decarbonylase CER1	Down	gmx:100790115	very-long-chain aldehyde decarbonylase CER1
Glyma.13G309400	NA	NA	Down	NA	NA
Glyma.08G334500	100306349	uncharacterized LOC100306349	Down	gmx:100306349	uncharacterized protein LOC100306349
Glyma.17G105200	102667476	uncharacterized LOC102667476	Down	gmx:102667476	uncharacterized protein LOC102667476
Glyma.08G248000	100779638	isoflavone 7-O-methyltransferase	Down	gmx:100779638	isoflavone 7-O-methyltransferase
Glyma.07G208700	NA	NA	Down	NA	NA
Glyma.20G007000	102665189	cytochrome P450 71D11	Down	gmx:102665189	cytochrome P450 71D11
Glyma.04G227600	100781717	uncharacterized LOC100781717	Down	gmx:100781717	uncharacterized protein LOC100781717
Glyma.17G069500	100306600	uncharacterized LOC100306600	Down	gmx:100306600	uncharacterized protein LOC100306600 precursor
Glyma.13G237000	100799417	dormancy-associated protein 1-like	Down	gmx:100799417	dormancy-associated protein 1-like isoform 1
Glyma.01G005200	100810474	glutathione hydrolase 3	Down	gmx:100810474	glutathione hydrolase 3 isoform X1
Glyma.13G254300	100801566	protein tfg-1	Down	gmx:100801566	protein tfg-1
Glyma.13G157600	NA	NA	Down	NA	NA
Glyma.13G278600	100812929	beta-glucosidase 18	Down	gmx:100812929	beta-glucosidase 18 isoform X2
Glyma.07G001800	100795558	protein brittle-1, chloroplastic/amyloplastic-like	Down	gmx:100795558	uncharacterized protein LOC100795558
Glyma.U007000	NA	NA	Down	NA	NA
Glyma.11G122600	100811430	cold-regulated 413 plasma membrane protein 1	Down	gmx:100811430	cold-regulated 413 plasma membrane protein 1 isoform X1
Glyma.10G224300	100809999	abscisic stress-ripening protein 5	Down	gmx:100809999	abscisic stress-ripening protein 5
Glyma.14G071700	100807950	bifunctional nuclease 1	Down	gmx:100807950	bifunctional nuclease 1
Glyma.16G208300	100799815	probable carboxylesterase 18	Down	gmx:100799815	probable carboxylesterase 18
Glyma.20G018000	100810397	phosphomannomutase/phosphoglucomutase	Down	gmx:100810397	phosphomannomutase/phosphoglucomutase
Glyma.17G036400	100500640	cell wall / vacuolar inhibitor of fructosidase	Down	gmx:100500640	cell wall / vacuolar inhibitor of fructosidase precursor
Glyma.06G170700	100776754	SNF1-related protein kinase regulatory subunit gamma-1	Down	gmx:100776754	SNF1-related protein kinase regulatory subunit gamma-1 isoform X2
Glyma.07G073500	100790647	uncharacterized LOC100790647	Down	gmx:100790647	uncharacterized protein LOC100790647 isoform X1
Glyma.14G083000	100781222	cold-regulated protein 27	Down	gmx:100781222	cold-regulated protein 27 isoform X2
Glyma.13G233000	100818078	glutamate receptor 2.7	Down	gmx:100818078	glutamate receptor 2.7 isoform X1
Glyma.09G212000	NA	NA	Down	NA	NA
Glyma.09G205000	100808540	uncharacterized LOC100808540	Down	gmx:100808540	uncharacterized protein LOC100808540
Glyma.13G309300	100785311	arogenate dehydratase 1	Down	gmx:100785311	arogenate dehydratase 1
Glyma.15G111400	100803175	uncharacterized LOC100803175	Down	gmx:100803175	uncharacterized protein LOC100803175
Glyma.03G089200	NA	NA	Down	NA	NA
Glyma.03G191100	100788429	heat stress transcription factor 7	Down	gmx:100788429	HSF-07; heat stress transcription factor A-3
Glyma.01G002000	100788024	uncharacterized LOC100788024	Down	gmx:100788024	uncharacterized protein LOC100788024
Glyma.11G151600	NA	NA	Down	NA	NA
Glyma.02G244300	100170732	peroxisomal small heat shock protein	Down	gmx:100170732	peroxisomal small heat shock protein
Glyma.07G078000	NA	NA	Down	NA	NA
Glyma.18G054100	100778102	probable serine/threonine-protein kinase WNK4	Down	gmx:100778102	probable serine/threonine-protein kinase WNK4
Glyma.02G303300	100785582	probable galactinol--sucrose galactosyltransferase 1	Down	gmx:100785582	probable galactinol--sucrose galactosyltransferase 1
Glyma.09G007000	100820127	chaperonin-like RbcX protein	Down	gmx:100820127	chaperonin-like RBCX protein 1, chloroplastic
Glyma.08G326400	NA	NA	Down	NA	NA
Glyma.12G118600	112998553	receptor-like protein kinase HSL1	Down	gmx:112998553	receptor-like protein kinase HSL1
Glyma.08G046500	100812253	adagio protein 3	Down	gmx:100812253	adagio protein 3
Glyma.12G055000	100813075	lysine-specific demethylase JMJ30	Down	gmx:100813075	lysine-specific demethylase JMJ30
Glyma.14G029300	NA	NA	Down	NA	NA
Glyma.01G122000	100796467	GDSL esterase/lipase CPRD49	Down	gmx:100796467	GDSL esterase/lipase CPRD49
Glyma.05G036800	100811485	transcription factor bHLH162	Down	gmx:100811485	transcription factor bHLH162
Glyma.06G009100	100786372	B-box zinc finger protein 20	Down	gmx:100786372	B-box zinc finger protein 20 isoform X2
Glyma.06G123700	100805093	pathogen-related protein	Down	gmx:100805093	pathogen-related protein
Glyma.20G178800	100816112	MLO-like protein 6	Down	gmx:100816112	MLO-like protein 6
Glyma.07G138800	100783029	protein MIZU-KUSSEI 1	Down	gmx:100783029	protein MIZU-KUSSEI 1
Glyma.08G282600	NA	NA	Down	NA	NA
Glyma.08G326300	106799619	ABC transporter C family member 3-like	Down	gmx:106799619	ABC transporter C family member 3-like isoform X1
Glyma.17G251800	100798264	uncharacterized LOC100798264	Down	gmx:100798264	uncharacterized protein LOC100798264
Glyma.15G076500	100305548	auxin-repressed superfamily protein	Down	gmx:100305548	auxin-repressed superfamily protein
Glyma.10G274300	100782921	zinc finger protein CONSTANS-LIKE 16-like	Down	gmx:100782921	COL22; zinc finger protein CONSTANS-LIKE 16-like
Glyma.07G138900	100527181	uncharacterized LOC100527181	Down	gmx:100527181	uncharacterized protein LOC100527181
Glyma.02G288700	100785395	uncharacterized LOC100785395	Down	gmx:100785395	uncharacterized protein LOC100785395
Glyma.06G265700	100787267	dihydroflavonol-4-reductase-like	Down	gmx:100787267	uncharacterized protein LOC100787267
Glyma.05G239400	100301889	circadian clock-associated FKF1	Down	gmx:100301889	FKF1; circadian clock-associated FKF1
Glyma.15G023100	100803712	inorganic pyrophosphatase 2	Down	gmx:100803712	LOW QUALITY PROTEIN: inorganic pyrophosphatase 2
Glyma.13G067200	102666152	inactive LRR receptor-like serine/threonine-protein kinase BIR2	Down	gmx:102666152	inactive LRR receptor-like serine/threonine-protein kinase BIR2
Glyma.13G231500	100819510	GDSL esterase/lipase At1g28600	Down	gmx:100819510	GDSL esterase/lipase At1g28600
Glyma.20G158500	100791989	low-temperature-induced 65 kDa protein	Down	gmx:100791989	low-temperature-induced 65 kDa protein
Glyma.13G332200	NA	NA	Down	NA	NA
Glyma.13G357500	100808818	putative dynein light chain type 1	Down	gmx:100808818	putative dynein light chain type 1
Glyma.02G136700	100305614	uncharacterized LOC100305614	Down	gmx:100305614	uncharacterized protein LOC100305614
Glyma.02G184300	100780033	putative disease resistance protein RGA4	Down	gmx:100780033	putative disease resistance protein RGA4
Glyma.12G060200	100816634	transcription factor LUXb	Down	gmx:100816634	LUXB; transcription factor PCL1
Glyma.02G255200	100775399	uncharacterized LOC100775399	Down	gmx:100775399	uncharacterized protein LOC100775399 isoform X1
Glyma.18G063500	100808567	ring finger domain-containing protein	Down	gmx:100808567	ring finger domain-containing protein isoform 2
Glyma.16G049000	100305960	putative light-regulated protein 1	Down	gmx:100305960	putative light-regulated protein 1
Glyma.10G013700	100306535	uncharacterized LOC100306535	Down	gmx:100306535	uncharacterized protein LOC100306535
Glyma.16G030000	NA	NA	Down	NA	NA
Glyma.04G056500	100807541	uncharacterized LOC100807541	Down	gmx:100807541	uncharacterized protein LOC100807541
Glyma.11G130600	100779376	lysine-specific demethylase JMJ30	Down	gmx:100779376	lysine-specific demethylase JMJ30 isoform X1
Glyma.07G139300	100306610	uncharacterized LOC100306610	Down	gmx:100306610	uncharacterized protein LOC100306610
Glyma.06G235100	100783357	uncharacterized LOC100783357	Down	gmx:100783357	uncharacterized protein LOC100783357
Glyma.04G196400	100784744	protein NUCLEAR FUSION DEFECTIVE 4	Down	gmx:100784744	protein NUCLEAR FUSION DEFECTIVE 4
Glyma.02G230800	100803772	CCT motif family protein	Down	gmx:100803772	uncharacterized protein LOC100803772
Glyma.18G221300	100779339	calmodulin-like protein 7	Down	gmx:100779339	calmodulin-like protein 7
Glyma.18G246100	NA	NA	Down	NA	NA
Glyma.17G143100	NA	NA	Down	NA	NA
Glyma.17G242100	100814610	cold-regulated protein 27	Down	gmx:100814610	cold-regulated protein 27 isoform X1
Glyma.13G283100	NA	NA	Down	NA	NA
Glyma.04G189700	100815921	cytochrome P450 71AP13	Down	gmx:100815921	cytochrome P450 71AP13
Glyma.08G356200	102661962	uncharacterized LOC102661962	Down	gmx:102661962	uncharacterized protein LOC102661962 isoform X1
Glyma.13G325500	NA	NA	Down	NA	NA
Glyma.11G123300	112998379	uncharacterized LOC112998379	Down	gmx:112998379	uncharacterized protein LOC112998379
Glyma.06G123900	100805472	endoglucanase 25	Down	gmx:100805472	endoglucanase 25
Glyma.12G048000	112998540	uncharacterized LOC112998540	Down	gmx:112998540	uncharacterized protein LOC112998540
Glyma.15G140500	NA	NA	Down	NA	NA
Glyma.15G031400	100812431	beta-glucosidase 12	Down	gmx:100812431	beta-glucosidase 12 isoform X1
Glyma.19G102400	100816615	light-regulated protein-like	Down	gmx:100816615	light-regulated protein-like
Glyma.08G050500	100792588	protein DETOXIFICATION 16	Down	gmx:100792588	protein DETOXIFICATION 16 isoform X1
Glyma.18G027500	100796686	protein EARLY FLOWERING 4b	Down	gmx:100796686	ELF4B; protein EARLY FLOWERING 4b
Glyma.09G143000	100783074	uncharacterized LOC100783074	Down	gmx:100783074	uncharacterized protein LOC100783074
Glyma.19G183700	100794061	auxin-responsive protein SAUR32-like	Down	gmx:100794061	auxin-responsive protein SAUR32-like
Glyma.16G196000	100811730	uncharacterized LOC100811730	Down	gmx:100811730	uncharacterized protein LOC100811730
Glyma.14G026100	100788166	uncharacterized LOC100788166	Down	gmx:100788166	uncharacterized protein LOC100788166
Glyma.15G031500	106796079	uncharacterized LOC106796079	Down	gmx:106796079	uncharacterized protein LOC106796079
Glyma.11G229700	100802905	protein EARLY FLOWERING 4a	Down	gmx:100802905	ELF4A; protein EARLY FLOWERING 4a
Glyma.20G031200	100792182	uncharacterized LOC100792182	Down	gmx:100792182	uncharacterized protein LOC100792182

## Sheet: Top_Down_KEGG_output
Supplementary Table 3: KEGG pathway mapping information for top-down and bottom-up analyses. "Genes" tabs provide input information for both analyses, which includes the KEGG ID conversion information. "Output" tabs provide the KEGG pathway Mapper Search output with all pathways (light green highlighting) and the corresponding genes from within each pathway that are DE between East- and West-grow…
gmx01100 Metabolic pathways - Glycine max (soybean) (109)
KEGG_ID	Orthology_Entry	Orthology)Name
gmx:100037474	K00422	aureusidin synthase
gmx:100500602	K01633	uncharacterized protein LOC100500602
gmx:100775407	K00851	gluconokinase
gmx:100776247	K01082	PAP-specific phosphatase HAL2-like
gmx:100776947	K15397	3-ketoacyl-CoA synthase 12
gmx:100777131	K18592	glutathione hydrolase 3 isoform X1
gmx:100777649	K00469	inositol oxygenase 2 isoform X1
gmx:100777875	K09840	probable carotenoid cleavage dioxygenase 4, chloroplastic
gmx:100778080	K01937	CTP synthase isoform X1
gmx:100778602	K09838	zeaxanthin epoxidase, chloroplastic isoform X1
gmx:100778763	K14652	bifunctional riboflavin biosynthesis protein RIBA 1, chloroplastic isoform X2
gmx:100779306	K22133	oxalate--CoA ligase
gmx:100780041	K00131	ALDH11A1; NADP-dependent glyceraldehyde-3-phosphate dehydrogenase
gmx:100780482	K19073	divinyl chlorophyllide a 8-vinyl-reductase, chloroplastic
gmx:100780485	K13600	chlorophyllide a oxygenase, chloroplastic isoform X1
gmx:100780534	K01850	chorismate mutase 3, chloroplastic isoform X1
gmx:100780597	K00167	2-oxoisovalerate dehydrogenase subunit beta 1, mitochondrial
gmx:100782277	K00454	linoleate 13S-lipoxygenase 2-1, chloroplastic
gmx:100782459	K01535	ATPase 11, plasma membrane-type
gmx:100782806	K00278	L-aspartate oxidase, chloroplastic
gmx:100782859	K01673	beta carbonic anhydrase 5, chloroplastic isoform X2
gmx:100783003	K01193	beta-fructofuranosidase, cell wall isozyme
gmx:100784882	K13379	UDP-arabinopyranose mutase 1
gmx:100785311	K05359	arogenate dehydratase 1
gmx:100785414	K09590	cytochrome P450 85A-like
gmx:100785506	K06617	probable galactinol--sucrose galactosyltransferase 1
gmx:100785541	K15746	BCH2; beta-carotene hydroxylase BCH2
gmx:100785582	K06617	probable galactinol--sucrose galactosyltransferase 1
gmx:100786478	K03147	phosphomethylpyrimidine synthase, chloroplastic
gmx:100787202	K00454	linoleate 13S-lipoxygenase 2-1, chloroplastic
gmx:100787207	K01209	alpha-L-arabinofuranosidase 1
gmx:100787294	K01047	uncharacterized protein LOC100787294
gmx:100787616	K09832	cytochrome P450 710A1
gmx:100787855	K11820	UDP-glycosyltransferase 74B1
gmx:100788814	K15889	probable isoprenylcysteine alpha-carbonyl methylesterase ICMEL2
gmx:100788953	K03146	thiamine thiazole synthase 2, chloroplastic
gmx:100789100	K00131	ALDH11A2; NADP-dependent glyceraldehyde-3-phosphate dehydrogenase
gmx:100789789	K00688	alpha-glucan phosphorylase, H isozyme
gmx:100790074	K08243	CHR4; chalcone reductase CHR4
gmx:100791763	K01969	methylcrotonoyl-CoA carboxylase beta chain, mitochondrial isoform X1
gmx:100791905	K01433	formyltetrahydrofolate deformylase 1, mitochondrial isoform X2
gmx:100792223	K19964	hydroxyisourate hydrolase
gmx:100792353	K05359	arogenate dehydratase/prephenate dehydratase 1, chloroplastic
gmx:100794288	K03146	thiamine thiazole synthase 2, chloroplastic
gmx:100794958	K01738	cysteine synthase-like
gmx:100795684	K14652	bifunctional riboflavin biosynthesis protein RIBA 1, chloroplastic isoform X1
gmx:100796769	K00850	ATP-dependent 6-phosphofructokinase 3
gmx:100797464	K00318	proline dehydrogenase 2, mitochondrial
gmx:100797597	K00770	cellulose synthase-like protein D5
gmx:100797826	K01897	long chain acyl-CoA synthetase 8
gmx:100798203	K01652	acetolactate synthase 3, chloroplastic
gmx:100798341	K00121	uncharacterized protein LOC100798341
gmx:100798399	K00276	primary amine oxidase
gmx:100800844	K00029	NADP-dependent malic enzyme
gmx:100801346	K00451	HGO1; homogentisate 1,2-dioxygenase
gmx:100801691	K09841	xanthoxin dehydrogenase
gmx:100802045	K00695	sucrose synthase 2 isoform X2
gmx:100802573	K00161	pyruvate dehydrogenase E1 component subunit alpha-3, chloroplastic
gmx:100802778	K15746	BCH4; beta-carotene hydroxylase 4
gmx:100803038	K13051	probable isoaspartyl peptidase/L-asparaginase 2
gmx:100803122	K00876	inorganic pyrophosphatase TTM1
gmx:100803481	K01772	ferrochelatase-2, chloroplastic isoform X1
gmx:100803677	K01897	long chain acyl-CoA synthetase 9, chloroplastic
gmx:100803712	K13248	LOW QUALITY PROTEIN: inorganic pyrophosphatase 2
gmx:100804565	K00218	protochlorophyllide reductase, chloroplastic
gmx:100804687	K00770	cellulose synthase-like protein D5
gmx:100804829	K00430	peroxidase 15-like protein precursor
gmx:100805114	K01784	uncharacterized protein LOC100805114
gmx:100805275	K13811	ATP sulfurylase 2
gmx:100805472	K01179	endoglucanase 25
gmx:100807861	K06617	probable galactinol--sucrose galactosyltransferase 2
gmx:100809808	K00942	guanylate kinase 2 isoform X1
gmx:100810474	K18592	glutathione hydrolase 3 isoform X1
gmx:100810799	K05917	obtusifoliol 14-alpha demethylase
gmx:100811186	K14085	ALDH7B2; aldehyde dehydrogenase family 7 member A1
gmx:100811331	K01673	beta carbonic anhydrase 5, chloroplastic
gmx:100811518	K02291	phytoene synthase 2, chloroplastic
gmx:100812431	K01188	beta-glucosidase 12 isoform X1
gmx:100812497	K10532	heparan-alpha-glucosaminide N-acetyltransferase
gmx:100812929	K05350	beta-glucosidase 18 isoform X2
gmx:100813185	K04123	ent-kaurenoic acid oxidase 2
gmx:100813286	K17285	selenium-binding protein 2
gmx:100813368	K15746	BCH5; beta-carotene hydroxylase 5
gmx:100814223	K04122	ent-kaurene oxidase
gmx:100815480	K00021	3-hydroxy-3-methylglutaryl-coenzyme A reductase 3
gmx:100815822	K00873	plastidial pyruvate kinase 2
gmx:100816146	K03921	SACPD; stearoyl-acyl carrier protein desaturase
gmx:100816209	K00876	uridine kinase-like protein 1, chloroplastic isoform X2
gmx:100816256	K01728	probable pectate lyase 5
gmx:100816314	K01069	GLYII-7; putative hydroxyacylglutathione hydrolase
gmx:100817119	K02291	phytoene synthase 2, chloroplastic
gmx:100817228	K01648	ATP-citrate synthase alpha chain protein 1
gmx:100817924	K01051	probable pectinesterase 53
gmx:100818350	K15397	3-ketoacyl-CoA synthase 6
gmx:100818441	K01810	glucose-6-phosphate isomerase 1, chloroplastic
gmx:100818522	K16903	tryptophan aminotransferase-related protein 2
gmx:100818670	K22848	diacylglycerol O-acyltransferase 2D-like isoform X1
gmx:100819937	K00430	peroxidase 50
gmx:100820031	K00511	squalene monooxygenase SE1
gmx:100820171	K09838	zeaxanthin epoxidase, chloroplastic-like
gmx:100820316	K00640	serine acetyltransferase 1, chloroplastic
gmx:100820586	K13600	chlorophyllide a oxygenase, chloroplastic isoform X1
gmx:547604	K01858	MIPS; myo-inositol-3-phosphate synthase
gmx:547749	K00318	PDH; proline dehydrogenase
gmx:547872	K00430	peroxidase 3
gmx:547931	K01177	BMY1; beta-amylase
gmx:547981	K01611	SAMDC; S-adenosylmethionine decarboxylase
gmx:548030	K00799	glutathione S-transferase GST 16
gmx:732546	K01859	CHI2-A; chalcone--flavonone isomerase 2-A
gmx01110 Biosynthesis of secondary metabolites - Glycine max (soybean) (68)
gmx:100037474	K00422	aureusidin synthase
gmx:100775407	K00851	gluconokinase
gmx:100776947	K15397	3-ketoacyl-CoA synthase 12
gmx:100777875	K09840	probable carotenoid cleavage dioxygenase 4, chloroplastic
gmx:100778602	K09838	zeaxanthin epoxidase, chloroplastic isoform X1
gmx:100778763	K14652	bifunctional riboflavin biosynthesis protein RIBA 1, chloroplastic isoform X2
gmx:100779638	K13262	isoflavone 7-O-methyltransferase
gmx:100780270	K22794	UDP-glycosyltransferase 79B30-like
gmx:100780482	K19073	divinyl chlorophyllide a 8-vinyl-reductase, chloroplastic
gmx:100780485	K13600	chlorophyllide a oxygenase, chloroplastic isoform X1
gmx:100780534	K01850	chorismate mutase 3, chloroplastic isoform X1
gmx:100780597	K00167	2-oxoisovalerate dehydrogenase subunit beta 1, mitochondrial
gmx:100782277	K00454	linoleate 13S-lipoxygenase 2-1, chloroplastic
gmx:100783003	K01193	beta-fructofuranosidase, cell wall isozyme
gmx:100784120	K22932	isoflavone 3'-hydroxylase
gmx:100785311	K05359	arogenate dehydratase 1
gmx:100785414	K09590	cytochrome P450 85A-like
gmx:100785541	K15746	BCH2; beta-carotene hydroxylase BCH2
gmx:100787202	K00454	linoleate 13S-lipoxygenase 2-1, chloroplastic
gmx:100787294	K01047	uncharacterized protein LOC100787294
gmx:100787616	K09832	cytochrome P450 710A1
gmx:100787855	K11820	UDP-glycosyltransferase 74B1
gmx:100788814	K15889	probable isoprenylcysteine alpha-carbonyl methylesterase ICMEL2
gmx:100789789	K00688	alpha-glucan phosphorylase, H isozyme
gmx:100790074	K08243	CHR4; chalcone reductase CHR4
gmx:100790115	K15404	very-long-chain aldehyde decarbonylase CER1
gmx:100792353	K05359	arogenate dehydratase/prephenate dehydratase 1, chloroplastic
gmx:100794958	K01738	cysteine synthase-like
gmx:100795684	K14652	bifunctional riboflavin biosynthesis protein RIBA 1, chloroplastic isoform X1
gmx:100796769	K00850	ATP-dependent 6-phosphofructokinase 3
gmx:100797464	K00318	proline dehydrogenase 2, mitochondrial
gmx:100798203	K01652	acetolactate synthase 3, chloroplastic
gmx:100798341	K00121	uncharacterized protein LOC100798341
gmx:100798399	K00276	primary amine oxidase
gmx:100801691	K09841	xanthoxin dehydrogenase
gmx:100802045	K00695	sucrose synthase 2 isoform X2
gmx:100802573	K00161	pyruvate dehydrogenase E1 component subunit alpha-3, chloroplastic
gmx:100802778	K15746	BCH4; beta-carotene hydroxylase 4
gmx:100803038	K13051	probable isoaspartyl peptidase/L-asparaginase 2
gmx:100803481	K01772	ferrochelatase-2, chloroplastic isoform X1
gmx:100804565	K00218	protochlorophyllide reductase, chloroplastic
gmx:100804829	K00430	peroxidase 15-like protein precursor
gmx:100805275	K13811	ATP sulfurylase 2
gmx:100808619	K00279	cytokinin dehydrogenase 6
gmx:100810799	K05917	obtusifoliol 14-alpha demethylase
gmx:100811186	K14085	ALDH7B2; aldehyde dehydrogenase family 7 member A1
gmx:100811518	K02291	phytoene synthase 2, chloroplastic
gmx:100812431	K01188	beta-glucosidase 12 isoform X1
gmx:100812929	K05350	beta-glucosidase 18 isoform X2
gmx:100813185	K04123	ent-kaurenoic acid oxidase 2
gmx:100813368	K15746	BCH5; beta-carotene hydroxylase 5
gmx:100814223	K04122	ent-kaurene oxidase
gmx:100815480	K00021	3-hydroxy-3-methylglutaryl-coenzyme A reductase 3
gmx:100815822	K00873	plastidial pyruvate kinase 2
gmx:100817119	K02291	phytoene synthase 2, chloroplastic
gmx:100817228	K01648	ATP-citrate synthase alpha chain protein 1
gmx:100818350	K15397	3-ketoacyl-CoA synthase 6
gmx:100818441	K01810	glucose-6-phosphate isomerase 1, chloroplastic
gmx:100819937	K00430	peroxidase 50
gmx:100820031	K00511	squalene monooxygenase SE1
gmx:100820171	K09838	zeaxanthin epoxidase, chloroplastic-like
gmx:100820316	K00640	serine acetyltransferase 1, chloroplastic
gmx:100820586	K13600	chlorophyllide a oxygenase, chloroplastic isoform X1
gmx:547604	K01858	MIPS; myo-inositol-3-phosphate synthase
gmx:547749	K00318	PDH; proline dehydrogenase
gmx:547872	K00430	peroxidase 3
gmx:547931	K01177	BMY1; beta-amylase
gmx:732546	K01859	CHI2-A; chalcone--flavonone isomerase 2-A
gmx04814 Motor proteins - Glycine max (soybean) (22)
gmx:100527181	K10418	uncharacterized protein LOC100527181
gmx:100527842	K10418	uncharacterized protein LOC100527842
gmx:100779567	K10398	kinesin-like protein KIN-10A
gmx:100780066	K10406	kinesin-like protein KIN-14S isoform X3
gmx:100780319	K10405	kinesin-like protein KIN-14C
gmx:100784487	K07374	tubulin alpha-3 chain
gmx:100785790	K10400	kinesin-like protein KIN-12B isoform X1
gmx:100786278	K10398	kinesin-like protein KIN-10A
gmx:100788477	K10406	kinesin-like protein KIN-14S
gmx:100789000	K10355	actin-7 isoform X2
gmx:100791845	K11498	kinesin-like protein KIN-7B isoform X1
gmx:100794302	K10398	kinesin-like protein KIN-5B
gmx:100796371	K07374	tubulin alpha-6 chain
gmx:100800246	K10398	kinesin-like protein KIN-5C
gmx:100804591	K10403	kinesin-like protein KIN-10B
gmx:100808818	K10418	putative dynein light chain type 1
gmx:100809612	K10403	kinesin-like protein KIN-10C isoform X1
gmx:100811516	K10406	kinesin-like protein KIN-14F
gmx:100813437	K10355	actin
gmx:100814373	K10400	kinesin-like protein KIN-12E
gmx:100817066	K10400	kinesin-like protein KIN-12F
gmx:100817813	K10406	kinesin-like protein KIN-14S
gmx04075 Plant hormone signal transduction - Glycine max (soybean) (13)
gmx:100305700	K14488	uncharacterized protein LOC100305700
gmx:100777944	K14506	jasmonoyl--L-amino acid synthetase JAR4
gmx:100781660	K14484	auxin-responsive protein IAA30
gmx:100787087	K14502	shaggy-related protein kinase eta
gmx:100788576	K14496	abscisic acid receptor PYR1
gmx:100793353	K14431	TGA23; bZIP transcription factor
gmx:100800032	K14508	LOW QUALITY PROTEIN: BTB/POZ domain and ankyrin repeat-containing protein NPR1
gmx:100801175	K14498	serine/threonine-protein kinase SAPK10
gmx:100803764	K14497	protein phosphatase 2C 53
gmx:100807822	K14491	two-component response regulator ARR12
gmx:100810237	K14502	shaggy-related protein kinase eta isoform X1
gmx:100812801	K14502	shaggy-related protein kinase eta isoform X1
gmx:100818762	K14492	two-component response regulator ARR9-like
gmx04712 Circadian rhythm - plant - Glycine max (soybean) (12)
gmx:100271888	K12133	LCL1; late elongated hypocotyl and circadian clock associated-1-like protein 1
gmx:100301889	K12116	FKF1; circadian clock-associated FKF1
gmx:100777119	K12130	two-component response regulator-like PRR95
gmx:100784383	K12130	two-component response regulator-like APRR9 isoform X2
gmx:100789357	K03115	putative casein kinase II subunit beta isoform 1
gmx:100793561	K12125	ELF3A; protein EARLY FLOWERING 3
gmx:100802144	K16240	protein SUPPRESSOR OF PHYA-105 1
gmx:100812253	K12116	adagio protein 3
gmx:100813528	K03097	casein kinase II subunit alpha-2
gmx:100813745	K10143	E3 ubiquitin-protein ligase COP1
gmx:778086	K12133	MYB114; MYB transcription factor MYB114
gmx:780540	K12133	LCL3; protein LHY
gmx01200 Carbon metabolism - Glycine max (soybean) (11)
gmx:100775407	K00851	gluconokinase
gmx:100780041	K00131	ALDH11A1; NADP-dependent glyceraldehyde-3-phosphate dehydrogenase
gmx:100789100	K00131	ALDH11A2; NADP-dependent glyceraldehyde-3-phosphate dehydrogenase
gmx:100794958	K01738	cysteine synthase-like
gmx:100796769	K00850	ATP-dependent 6-phosphofructokinase 3
gmx:100798341	K00121	uncharacterized protein LOC100798341
gmx:100800844	K00029	NADP-dependent malic enzyme
gmx:100802573	K00161	pyruvate dehydrogenase E1 component subunit alpha-3, chloroplastic
gmx:100815822	K00873	plastidial pyruvate kinase 2
gmx:100818441	K01810	glucose-6-phosphate isomerase 1, chloroplastic
gmx:100820316	K00640	serine acetyltransferase 1, chloroplastic
gmx01240 Biosynthesis of cofactors - Glycine max (soybean) (10)
gmx:100500602	K01633	uncharacterized protein LOC100500602
gmx:100778080	K01937	CTP synthase isoform X1
gmx:100778763	K14652	bifunctional riboflavin biosynthesis protein RIBA 1, chloroplastic isoform X2
gmx:100782806	K00278	L-aspartate oxidase, chloroplastic
gmx:100786478	K03147	phosphomethylpyrimidine synthase, chloroplastic
gmx:100788953	K03146	thiamine thiazole synthase 2, chloroplastic
gmx:100794288	K03146	thiamine thiazole synthase 2, chloroplastic
gmx:100795684	K14652	bifunctional riboflavin biosynthesis protein RIBA 1, chloroplastic isoform X1
gmx:100803481	K01772	ferrochelatase-2, chloroplastic isoform X1
gmx:100803712	K13248	LOW QUALITY PROTEIN: inorganic pyrophosphatase 2
gmx00906 Carotenoid biosynthesis - Glycine max (soybean) (9)
gmx:100777875	K09840	probable carotenoid cleavage dioxygenase 4, chloroplastic
gmx:100778602	K09838	zeaxanthin epoxidase, chloroplastic isoform X1
gmx:100785541	K15746	BCH2; beta-carotene hydroxylase BCH2
gmx:100801691	K09841	xanthoxin dehydrogenase
gmx:100802778	K15746	BCH4; beta-carotene hydroxylase 4
gmx:100811518	K02291	phytoene synthase 2, chloroplastic
gmx:100813368	K15746	BCH5; beta-carotene hydroxylase 5
gmx:100817119	K02291	phytoene synthase 2, chloroplastic
gmx:100820171	K09838	zeaxanthin epoxidase, chloroplastic-like
gmx04120 Ubiquitin mediated proteolysis - Glycine max (soybean) (9)
gmx:100305664	K06688	ubiquitin-conjugating enzyme E2
gmx:100500581	K10573	uncharacterized protein LOC100500581
gmx:100527864	K06688	ubiquitin-conjugating enzyme
gmx:100784841	K03363	cell division cycle 20.2, cofactor of APC complex
gmx:100792038	K10144	uncharacterized protein LOC100792038
gmx:100803569	K10144	probable E3 ubiquitin-protein ligase RZFP34
gmx:100808928	K03364	protein FIZZY-RELATED 3
gmx:100812709	K10144	E3 ubiquitin-protein ligase RZFP34
gmx:100813745	K10143	E3 ubiquitin-protein ligase COP1
gmx01230 Biosynthesis of amino acids - Glycine max (soybean) (8)
gmx:100780534	K01850	chorismate mutase 3, chloroplastic isoform X1
gmx:100785311	K05359	arogenate dehydratase 1
gmx:100792353	K05359	arogenate dehydratase/prephenate dehydratase 1, chloroplastic
gmx:100794958	K01738	cysteine synthase-like
gmx:100796769	K00850	ATP-dependent 6-phosphofructokinase 3
gmx:100798203	K01652	acetolactate synthase 3, chloroplastic
gmx:100815822	K00873	plastidial pyruvate kinase 2
gmx:100820316	K00640	serine acetyltransferase 1, chloroplastic
gmx00010 Glycolysis / Gluconeogenesis - Glycine max (soybean) (8)
gmx:100780041	K00131	ALDH11A1; NADP-dependent glyceraldehyde-3-phosphate dehydrogenase
gmx:100789100	K00131	ALDH11A2; NADP-dependent glyceraldehyde-3-phosphate dehydrogenase
gmx:100796769	K00850	ATP-dependent 6-phosphofructokinase 3
gmx:100798341	K00121	uncharacterized protein LOC100798341
gmx:100802573	K00161	pyruvate dehydrogenase E1 component subunit alpha-3, chloroplastic
gmx:100811186	K14085	ALDH7B2; aldehyde dehydrogenase family 7 member A1
gmx:100815822	K00873	plastidial pyruvate kinase 2
gmx:100818441	K01810	glucose-6-phosphate isomerase 1, chloroplastic
gmx00500 Starch and sucrose metabolism - Glycine max (soybean) (8)
gmx:100783003	K01193	beta-fructofuranosidase, cell wall isozyme
gmx:100789789	K00688	alpha-glucan phosphorylase, H isozyme
gmx:100802045	K00695	sucrose synthase 2 isoform X2
gmx:100805472	K01179	endoglucanase 25
gmx:100812431	K01188	beta-glucosidase 12 isoform X1
gmx:100812929	K05350	beta-glucosidase 18 isoform X2
gmx:100818441	K01810	glucose-6-phosphate isomerase 1, chloroplastic
gmx:547931	K01177	BMY1; beta-amylase
gmx00520 Amino sugar and nucleotide sugar metabolism - Glycine max (soybean) (6)
gmx:100784882	K13379	UDP-arabinopyranose mutase 1
gmx:100787207	K01209	alpha-L-arabinofuranosidase 1
gmx:100797597	K00770	cellulose synthase-like protein D5
gmx:100804687	K00770	cellulose synthase-like protein D5
gmx:100805114	K01784	uncharacterized protein LOC100805114
gmx:100818441	K01810	glucose-6-phosphate isomerase 1, chloroplastic
gmx00620 Pyruvate metabolism - Glycine max (soybean) (6)
gmx:100798341	K00121	uncharacterized protein LOC100798341
gmx:100800844	K00029	NADP-dependent malic enzyme
gmx:100802573	K00161	pyruvate dehydrogenase E1 component subunit alpha-3, chloroplastic
gmx:100811186	K14085	ALDH7B2; aldehyde dehydrogenase family 7 member A1
gmx:100815822	K00873	plastidial pyruvate kinase 2
gmx:100816314	K01069	GLYII-7; putative hydroxyacylglutathione hydrolase
gmx00052 Galactose metabolism - Glycine max (soybean) (6)
gmx:100783003	K01193	beta-fructofuranosidase, cell wall isozyme
gmx:100785506	K06617	probable galactinol--sucrose galactosyltransferase 1
gmx:100785582	K06617	probable galactinol--sucrose galactosyltransferase 1
gmx:100796769	K00850	ATP-dependent 6-phosphofructokinase 3
gmx:100805114	K01784	uncharacterized protein LOC100805114
gmx:100807861	K06617	probable galactinol--sucrose galactosyltransferase 2
gmx00460 Cyanoamino acid metabolism - Glycine max (soybean) (5)
gmx:100777131	K18592	glutathione hydrolase 3 isoform X1
gmx:100803038	K13051	probable isoaspartyl peptidase/L-asparaginase 2
gmx:100810474	K18592	glutathione hydrolase 3 isoform X1
gmx:100812431	K01188	beta-glucosidase 12 isoform X1
gmx:100812929	K05350	beta-glucosidase 18 isoform X2
gmx00920 Sulfur metabolism - Glycine max (soybean) (5)
gmx:100776247	K01082	PAP-specific phosphatase HAL2-like
gmx:100794958	K01738	cysteine synthase-like
gmx:100805275	K13811	ATP sulfurylase 2
gmx:100813286	K17285	selenium-binding protein 2
gmx:100820316	K00640	serine acetyltransferase 1, chloroplastic
gmx00030 Pentose phosphate pathway - Glycine max (soybean) (5)
gmx:100775407	K00851	gluconokinase
gmx:100780041	K00131	ALDH11A1; NADP-dependent glyceraldehyde-3-phosphate dehydrogenase
gmx:100789100	K00131	ALDH11A2; NADP-dependent glyceraldehyde-3-phosphate dehydrogenase
gmx:100796769	K00850	ATP-dependent 6-phosphofructokinase 3
gmx:100818441	K01810	glucose-6-phosphate isomerase 1, chloroplastic
gmx04626 Plant-pathogen interaction - Glycine max (soybean) (5)
gmx:100776947	K15397	3-ketoacyl-CoA synthase 12
gmx:100779565	K01373	cysteine proteinase 15A
gmx:100794895	K05391	probable cyclic nucleotide-gated ion channel 20, chloroplastic isoform X1
gmx:100810471	K05391	cyclic nucleotide-gated ion channel 2 isoform X1
gmx:100818350	K15397	3-ketoacyl-CoA synthase 6
gmx00860 Porphyrin metabolism - Glycine max (soybean) (5)
gmx:100780482	K19073	divinyl chlorophyllide a 8-vinyl-reductase, chloroplastic
gmx:100780485	K13600	chlorophyllide a oxygenase, chloroplastic isoform X1
gmx:100803481	K01772	ferrochelatase-2, chloroplastic isoform X1
gmx:100804565	K00218	protochlorophyllide reductase, chloroplastic
gmx:100820586	K13600	chlorophyllide a oxygenase, chloroplastic isoform X1
gmx04144 Endocytosis - Glycine max (soybean) (4)
gmx:100788855	K18466	uncharacterized protein LOC100788855
gmx:100789485	K03283	heat shock cognate 70 kDa protein 2
gmx:100797794	K07904	ras-related protein RABA3-like
gmx:100809091	K12483	EH domain-containing protein 1
gmx01232 Nucleotide metabolism - Glycine max (soybean) (4)
gmx:100778080	K01937	CTP synthase isoform X1
gmx:100803122	K00876	inorganic pyrophosphatase TTM1
gmx:100809808	K00942	guanylate kinase 2 isoform X1
gmx:100816209	K00876	uridine kinase-like protein 1, chloroplastic isoform X2
gmx00071 Fatty acid degradation - Glycine max (soybean) (4)
gmx:100797826	K01897	long chain acyl-CoA synthetase 8
gmx:100798341	K00121	uncharacterized protein LOC100798341
gmx:100803677	K01897	long chain acyl-CoA synthetase 9, chloroplastic
gmx:100811186	K14085	ALDH7B2; aldehyde dehydrogenase family 7 member A1
gmx00350 Tyrosine metabolism - Glycine max (soybean) (4)
gmx:100037474	K00422	aureusidin synthase
gmx:100798341	K00121	uncharacterized protein LOC100798341
gmx:100798399	K00276	primary amine oxidase
gmx:100801346	K00451	HGO1; homogentisate 1,2-dioxygenase
gmx01250 Biosynthesis of nucleotide sugars - Glycine max (soybean) (4)
gmx:100777649	K00469	inositol oxygenase 2 isoform X1
gmx:100784882	K13379	UDP-arabinopyranose mutase 1
gmx:100805114	K01784	uncharacterized protein LOC100805114
gmx:100818441	K01810	glucose-6-phosphate isomerase 1, chloroplastic
gmx00330 Arginine and proline metabolism - Glycine max (soybean) (4)
gmx:100797464	K00318	proline dehydrogenase 2, mitochondrial
gmx:100811186	K14085	ALDH7B2; aldehyde dehydrogenase family 7 member A1
gmx:547749	K00318	PDH; proline dehydrogenase
gmx:547981	K01611	SAMDC; S-adenosylmethionine decarboxylase
gmx02010 ABC transporters - Glycine max (soybean) (4)
gmx:100789571	K05681	ABC transporter G family member 1 isoform X2
gmx:100790712	K05681	ABC transporter G family member 8
gmx:100792958	K05681	ABC transporter G family member 1
gmx:100800293	K05658	ABC transporter B family member 11
gmx00380 Tryptophan metabolism - Glycine max (soybean) (4)
gmx:100787855	K11820	UDP-glycosyltransferase 74B1
gmx:100792133	K23947	2-oxoglutarate-dependent dioxygenase DAO
gmx:100811186	K14085	ALDH7B2; aldehyde dehydrogenase family 7 member A1
gmx:100818522	K16903	tryptophan aminotransferase-related protein 2
gmx00073 Cutin, suberine and wax biosynthesis - Glycine max (soybean) (4)
gmx:100783249	K21995	cytochrome P450 77A1
gmx:100784433	K15403	protein HOTHEAD
gmx:100788704	K15403	protein HOTHEAD
gmx:100790115	K15404	very-long-chain aldehyde decarbonylase CER1
gmx04016 MAPK signaling pathway - plant - Glycine max (soybean) (3)
gmx:100788576	K14496	abscisic acid receptor PYR1
gmx:100801175	K14498	serine/threonine-protein kinase SAPK10
gmx:100803764	K14497	protein phosphatase 2C 53
gmx03018 RNA degradation - Glycine max (soybean) (3)
gmx:100785937	K04077	ruBisCO large subunit-binding protein subunit beta, chloroplastic isoform X1
gmx:100796464	K04077	ruBisCO large subunit-binding protein subunit beta, chloroplastic isoform X1
gmx:100796769	K00850	ATP-dependent 6-phosphofructokinase 3
gmx00100 Steroid biosynthesis - Glycine max (soybean) (3)
gmx:100787616	K09832	cytochrome P450 710A1
gmx:100810799	K05917	obtusifoliol 14-alpha demethylase
gmx:100820031	K00511	squalene monooxygenase SE1
gmx00061 Fatty acid biosynthesis - Glycine max (soybean) (3)
gmx:100797826	K01897	long chain acyl-CoA synthetase 8
gmx:100803677	K01897	long chain acyl-CoA synthetase 9, chloroplastic
gmx:100816146	K03921	SACPD; stearoyl-acyl carrier protein desaturase
gmx01212 Fatty acid metabolism - Glycine max (soybean) (3)
gmx:100797826	K01897	long chain acyl-CoA synthetase 8
gmx:100803677	K01897	long chain acyl-CoA synthetase 9, chloroplastic
gmx:100816146	K03921	SACPD; stearoyl-acyl carrier protein desaturase
gmx00240 Pyrimidine metabolism - Glycine max (soybean) (3)
gmx:100778080	K01937	CTP synthase isoform X1
gmx:100803122	K00876	inorganic pyrophosphatase TTM1
gmx:100816209	K00876	uridine kinase-like protein 1, chloroplastic isoform X2
gmx00591 Linoleic acid metabolism - Glycine max (soybean) (3)
gmx:100782277	K00454	linoleate 13S-lipoxygenase 2-1, chloroplastic
gmx:100787202	K00454	linoleate 13S-lipoxygenase 2-1, chloroplastic
gmx:100787294	K01047	uncharacterized protein LOC100787294
gmx04141 Protein processing in endoplasmic reticulum - Glycine max (soybean) (3)
gmx:100170732	K13993	peroxisomal small heat shock protein
gmx:100789485	K03283	heat shock cognate 70 kDa protein 2
gmx:100798298	K13993	small heat shock protein, chloroplastic isoform X1
gmx00730 Thiamine metabolism - Glycine max (soybean) (3)
gmx:100786478	K03147	phosphomethylpyrimidine synthase, chloroplastic
gmx:100788953	K03146	thiamine thiazole synthase 2, chloroplastic
gmx:100794288	K03146	thiamine thiazole synthase 2, chloroplastic
gmx00592 alpha-Linolenic acid metabolism - Glycine max (soybean) (3)
gmx:100782277	K00454	linoleate 13S-lipoxygenase 2-1, chloroplastic
gmx:100787202	K00454	linoleate 13S-lipoxygenase 2-1, chloroplastic
gmx:100787294	K01047	uncharacterized protein LOC100787294
gmx04146 Peroxisome - Glycine max (soybean) (3)
gmx:100499909	K13347	uncharacterized protein LOC100499909
gmx:100797826	K01897	long chain acyl-CoA synthetase 8
gmx:100803677	K01897	long chain acyl-CoA synthetase 9, chloroplastic
gmx00270 Cysteine and methionine metabolism - Glycine max (soybean) (3)
gmx:100794958	K01738	cysteine synthase-like
gmx:100820316	K00640	serine acetyltransferase 1, chloroplastic
gmx:547981	K01611	SAMDC; S-adenosylmethionine decarboxylase
gmx00400 Phenylalanine, tyrosine and tryptophan biosynthesis - Glycine max (soybean) (3)
gmx:100780534	K01850	chorismate mutase 3, chloroplastic isoform X1
gmx:100785311	K05359	arogenate dehydratase 1
gmx:100792353	K05359	arogenate dehydratase/prephenate dehydratase 1, chloroplastic
gmx00940 Phenylpropanoid biosynthesis - Glycine max (soybean) (3)
gmx:100804829	K00430	peroxidase 15-like protein precursor
gmx:100819937	K00430	peroxidase 50
gmx:547872	K00430	peroxidase 3
gmx00230 Purine metabolism - Glycine max (soybean) (3)
gmx:100792223	K19964	hydroxyisourate hydrolase
gmx:100805275	K13811	ATP sulfurylase 2
gmx:100809808	K00942	guanylate kinase 2 isoform X1
gmx00790 Folate biosynthesis - Glycine max (soybean) (3)
gmx:100500602	K01633	uncharacterized protein LOC100500602
gmx:100778763	K14652	bifunctional riboflavin biosynthesis protein RIBA 1, chloroplastic isoform X2
gmx:100795684	K14652	bifunctional riboflavin biosynthesis protein RIBA 1, chloroplastic isoform X1
gmx00590 Arachidonic acid metabolism - Glycine max (soybean) (3)
gmx:100777131 K18592 glutathione hydrolase 3 isoform X1
gmx:100787294 K01047 uncharacterized protein LOC100787294
gmx:100810474 K18592 glutathione hydrolase 3 isoform X1
gmx00480 Glutathione metabolism - Glycine max (soybean) (3)
gmx:100777131 K18592 glutathione hydrolase 3 isoform X1
gmx:100810474 K18592 glutathione hydrolase 3 isoform X1
gmx:548030 K00799 glutathione S-transferase GST 16
gmx00280 Valine, leucine and isoleucine degradation - Glycine max (soybean) (3)
gmx:100780597 K00167 2-oxoisovalerate dehydrogenase subunit beta 1, mitochondrial
gmx:100791763 K01969 methylcrotonoyl-CoA carboxylase beta chain, mitochondrial isoform X1
gmx:100811186 K14085 ALDH7B2; aldehyde dehydrogenase family 7 member A1
gmx00561 Glycerolipid metabolism - Glycine max (soybean) (2)
gmx:100811186 K14085 ALDH7B2; aldehyde dehydrogenase family 7 member A1
gmx:100818670 K22848 diacylglycerol O-acyltransferase 2D-like isoform X1
gmx03022 Basal transcription factors - Glycine max (soybean) (2)
gmx:100784255 K03144 general transcription and DNA repair factor IIH subunit TFB2
gmx:100816922 K03133 transcription initiation factor TFIID subunit 9
gmx00900 Terpenoid backbone biosynthesis - Glycine max (soybean) (2)
gmx:100788814 K15889 probable isoprenylcysteine alpha-carbonyl methylesterase ICMEL2
gmx:100815480 K00021 3-hydroxy-3-methylglutaryl-coenzyme A reductase 3
gmx00910 Nitrogen metabolism - Glycine max (soybean) (2)
gmx:100782859 K01673 beta carbonic anhydrase 5, chloroplastic isoform X2
gmx:100811331 K01673 beta carbonic anhydrase 5, chloroplastic
gmx04130 SNARE interactions in vesicular transport - Glycine max (soybean) (2)
gmx:100799493 K08486 syntaxin-related protein KNOLLE
gmx:100816016 K08486 syntaxin-related protein KNOLLE
gmx00785 Lipoic acid metabolism - Glycine max (soybean) (2)
gmx:100780597 K00167 2-oxoisovalerate dehydrogenase subunit beta 1, mitochondrial
gmx:100802573 K00161 pyruvate dehydrogenase E1 component subunit alpha-3, chloroplastic
gmx00950 Isoquinoline alkaloid biosynthesis - Glycine max (soybean) (2)
gmx:100037474 K00422 aureusidin synthase
gmx:100798399 K00276 primary amine oxidase
gmx00740 Riboflavin metabolism - Glycine max (soybean) (2)
gmx:100778763 K14652 bifunctional riboflavin biosynthesis protein RIBA 1, chloroplastic isoform X2
gmx:100795684 K14652 bifunctional riboflavin biosynthesis protein RIBA 1, chloroplastic isoform X1
gmx03008 Ribosome biogenesis in eukaryotes - Glycine max (soybean) (2)
gmx:100789357 K03115 putative casein kinase II subunit beta isoform 1
gmx:100813528 K03097 casein kinase II subunit alpha-2
gmx00260 Glycine, serine and threonine metabolism - Glycine max (soybean) (2)
gmx:100798399 K00276 primary amine oxidase
gmx:100811186 K14085 ALDH7B2; aldehyde dehydrogenase family 7 member A1
gmx04145 Phagosome - Glycine max (soybean) (2)
gmx:100784487 K07374 tubulin alpha-3 chain
gmx:100796371 K07374 tubulin alpha-6 chain
gmx00430 Taurine and hypotaurine metabolism - Glycine max (soybean) (2)
gmx:100777131 K18592 glutathione hydrolase 3 isoform X1
gmx:100810474 K18592 glutathione hydrolase 3 isoform X1
gmx00943 Isoflavonoid biosynthesis - Glycine max (soybean) (2)
gmx:100779638 K13262 isoflavone 7-O-methyltransferase
gmx:100784120 K22932 isoflavone 3'-hydroxylase
gmx00511 Other glycan degradation - Glycine max (soybean) (2)
gmx:100775419 K01191 alpha-mannosidase
gmx:100806748 K01191 alpha-mannosidase
gmx00941 Flavonoid biosynthesis - Glycine max (soybean) (2)
gmx:100790074 K08243 CHR4; chalcone reductase CHR4
gmx:732546 K01859 CHI2-A; chalcone--flavonone isomerase 2-A
gmx00250 Alanine, aspartate and glutamate metabolism - Glycine max (soybean) (2)
gmx:100782806 K00278 L-aspartate oxidase, chloroplastic
gmx:100803038 K13051 probable isoaspartyl peptidase/L-asparaginase 2
gmx00062 Fatty acid elongation - Glycine max (soybean) (2)
gmx:100776947 K15397 3-ketoacyl-CoA synthase 12
gmx:100818350 K15397 3-ketoacyl-CoA synthase 6
gmx00053 Ascorbate and aldarate metabolism - Glycine max (soybean) (2)
gmx:100777649 K00469 inositol oxygenase 2 isoform X1
gmx:100811186 K14085 ALDH7B2; aldehyde dehydrogenase family 7 member A1
gmx03030 DNA replication - Glycine max (soybean) (2)
gmx:100787290 K02542 DNA replication licensing factor MCM6 isoform X1
gmx:100798779 K02320 DNA polymerase alpha catalytic subunit
gmx00040 Pentose and glucuronate interconversions - Glycine max (soybean) (2)
gmx:100816256 K01728 probable pectate lyase 5
gmx:100817924 K01051 probable pectinesterase 53
gmx00020 Citrate cycle (TCA cycle) - Glycine max (soybean) (2)
gmx:100802573 K00161 pyruvate dehydrogenase E1 component subunit alpha-3, chloroplastic
gmx:100817228 K01648 ATP-citrate synthase alpha chain protein 1
gmx00999 Biosynthesis of various plant secondary metabolites - Glycine max (soybean); Including: Crocin biosynthesis, Ginsenoside biosynthesis, Saponin adjuvant biosynthesis, Cannabidiol biosynthesis, Mugineic acid biosynthesis, Pentagalloylglucose biosynthesis, Benzoxazinoid biosynthesis, Gramine biosynthesis, Coumarin biosynthesis, Furanocoumarin biosynthesis, Hordatine biosynthesis, Podophyllo…
gmx:100812431 K01188 beta-glucosidase 12 isoform X1
gmx:100812929 K05350 beta-glucosidase 18 isoform X2
gmx00564 Glycerophospholipid metabolism - Glycine max (soybean) (2)
gmx:100787294 K01047 uncharacterized protein LOC100787294
gmx:100808937 K13511 tafazzin
gmx01210 2-Oxocarboxylic acid metabolism - Glycine max (soybean) (2)
gmx:100787855 K11820 UDP-glycosyltransferase 74B1
gmx:100798203 K01652 acetolactate synthase 3, chloroplastic
gmx00410 beta-Alanine metabolism - Glycine max (soybean) (2)
gmx:100798399 K00276 primary amine oxidase
gmx:100811186 K14085 ALDH7B2; aldehyde dehydrogenase family 7 member A1
gmx00630 Glyoxylate and dicarboxylate metabolism - Glycine max (soybean) (2)
gmx:100779306 K22133 oxalate--CoA ligase
gmx:100791905 K01433 formyltetrahydrofolate deformylase 1, mitochondrial isoform X2
gmx00562 Inositol phosphate metabolism - Glycine max (soybean) (2)
gmx:100777649 K00469 inositol oxygenase 2 isoform X1
gmx:547604 K01858 MIPS; myo-inositol-3-phosphate synthase
gmx00904 Diterpenoid biosynthesis - Glycine max (soybean); Including: Gibberellin biosynthesis (2)
gmx:100813185 K04123 ent-kaurenoic acid oxidase 2
gmx:100814223 K04122 ent-kaurene oxidase
gmx00660 C5-Branched dibasic acid metabolism - Glycine max (soybean) (1)
gmx:100798203 K01652 acetolactate synthase 3, chloroplastic
gmx00670 One carbon pool by folate - Glycine max (soybean) (1)
gmx:100791905 K01433 formyltetrahydrofolate deformylase 1, mitochondrial isoform X2
gmx00944 Flavone and flavonol biosynthesis - Glycine max (soybean) (1)
gmx:100780270 K22794 UDP-glycosyltransferase 79B30-like
gmx00340 Histidine metabolism - Glycine max (soybean) (1)
gmx:100811186 K14085 ALDH7B2; aldehyde dehydrogenase family 7 member A1
gmx00261 Monobactam biosynthesis - Glycine max (soybean) (1)
gmx:100805275 K13811 ATP sulfurylase 2
gmx00450 Selenocompound metabolism - Glycine max (soybean) (1)
gmx:100805275 K13811 ATP sulfurylase 2
gmx03040 Spliceosome - Glycine max (soybean) (1)
gmx:100789485 K03283 heat shock cognate 70 kDa protein 2
gmx03015 mRNA surveillance pathway - Glycine max (soybean) (1)
gmx:100795277 K11584 serine/threonine protein phosphatase 2A 57 kDa regulatory subunit B' beta isoform
gmx00966 Glucosinolate biosynthesis - Glycine max (soybean) (1)
gmx:100787855 K11820 UDP-glycosyltransferase 74B1
gmx00360 Phenylalanine metabolism - Glycine max (soybean) (1)
gmx:100798399 K00276 primary amine oxidase
gmx00909 Sesquiterpenoid and triterpenoid biosynthesis - Glycine max (soybean) (1)
gmx:100820031 K00511 squalene monooxygenase SE1
gmx00190 Oxidative phosphorylation - Glycine max (soybean) (1)
gmx:100782459 K01535 ATPase 11, plasma membrane-type
gmx03440 Homologous recombination - Glycine max (soybean) (1)
gmx:100818578 K10879 DNA repair protein XRCC2 homolog isoform X2
gmx00710 Carbon fixation in photosynthetic organisms - Glycine max (soybean) (1)
gmx:100800844 K00029 NADP-dependent malic enzyme
gmx00908 Zeatin biosynthesis - Glycine max (soybean) (1)
gmx:100808619 K00279 cytokinin dehydrogenase 6
gmx00960 Tropane, piperidine and pyridine alkaloid biosynthesis - Glycine max (soybean) (1)
gmx:100798399 K00276 primary amine oxidase
gmx00640 Propanoate metabolism - Glycine max (soybean) (1)
gmx:100780597 K00167 2-oxoisovalerate dehydrogenase subunit beta 1, mitochondrial
gmx00531 Glycosaminoglycan degradation - Glycine max (soybean) (1)
gmx:100812497 K10532 heparan-alpha-glucosaminide N-acetyltransferase
gmx00565 Ether lipid metabolism - Glycine max (soybean) (1)
gmx:100787294 K01047 uncharacterized protein LOC100787294
gmx00290 Valine, leucine and isoleucine biosynthesis - Glycine max (soybean) (1)
gmx:100798203 K01652 acetolactate synthase 3, chloroplastic
gmx00760 Nicotinate and nicotinamide metabolism - Glycine max (soybean) (1)
gmx:100782806 K00278 L-aspartate oxidase, chloroplastic
gmx00650 Butanoate metabolism - Glycine max (soybean) (1)
gmx:100798203 K01652 acetolactate synthase 3, chloroplastic
gmx01040 Biosynthesis of unsaturated fatty acids - Glycine max (soybean) (1)
gmx:100816146 K03921 SACPD; stearoyl-acyl carrier protein desaturase
gmx00905 Brassinosteroid biosynthesis - Glycine max (soybean) (1)
gmx:100785414 K09590 cytochrome P450 85A-like
gmx00051 Fructose and mannose metabolism - Glycine max (soybean) (1)
gmx:100796769 K00850 ATP-dependent 6-phosphofructokinase 3
gmx00310 Lysine degradation - Glycine max (soybean) (1)
gmx:100811186 K14085 ALDH7B2; aldehyde dehydrogenase family 7 member A1
gmx00543 Exopolysaccharide biosynthesis - Glycine max (soybean) (1)
gmx:100820316 K00640 serine acetyltransferase 1, chloroplastic
gmx00770 Pantothenate and CoA biosynthesis - Glycine max (soybean) (1)
gmx:100798203 K01652 acetolactate synthase 3, chloroplastic
gmx00750 Vitamin B6 metabolism - Glycine max (soybean) (1)
gmx:100803712	K13248	LOW QUALITY PROTEIN: inorganic pyrophosphatase 2
gmx03420 Nucleotide excision repair - Glycine max (soybean) (1)
gmx:100784255	K03144	general transcription and DNA repair factor IIH subunit TFB2

## Sheet: Bottom_Up_KEGG_genes
Supplementary Table 3: KEGG pathway mapping information for top-down and bottom-up analyses. "Genes" tabs provide input information for both analyses, which includes the KEGG ID conversion information. "Output" tabs provide the KEGG pathway Mapper Search output with all pathways (light green highlighting) and the corresponding genes from within each pathway that are DE between East- and West-grow…
Search_term	Gmax 2_0 Primary Protein ID (1)	NCBI Gene ID	NCBI Gene deascription April 20 2023	KEGG_ID	Up- or Down-regulated	E.C.					ID Conversion Result			20 map to G. max metabolism (broad)
Asparagine	Glyma_07G257700	100807247	stem-specific protein TSJT1	gmx:100807247	Down
	Glyma_13G279200	100783727	stem-specific protein TSJT1	gmx:100783727	Down						Display KEGG IDs only			15 map to Asp-Ala-Glu
	Glyma_15G073100	100798222	stem-specific protein TSJT1	gmx:100798222	Down
	Glyma_15G105100	100789239	Wali7 domain-contining protein	gmx:100789239	Down						ncbi-geneid:100807247	gmx:100807247	stem-specific protein TSJT1
	Glyma_11G171400	100798318	asparagine synthetase [glutamine-hydrolyzing] 2	gmx:100798318	Down	6.3.5.4					ncbi-geneid:100783727	gmx:100783727	stem-specific protein TSJT1 isoform X2
	Glyma_11G170300	547877	asparagine synthetase	gmx:547877	Down	6.3.5.4					ncbi-geneid:100798222	gmx:100798222	stem-specific protein TSJT1
	Glyma_18G061100	547895	asparagine synthetase 1	gmx:547895	Down	6.3.5.4					ncbi-geneid:100789239	gmx:100789239	uncharacterized protein LOC100789239
	Glyma_17G238200	100803038	probable isoaspartyl peptidase/L-asparaginase 2	gmx:100803038	Up	3.5.1.1					ncbi-geneid:100798318	gmx:100798318	asparagine synthetase [glutamine-hydrolyzing] 2
	Glyma_04G042100	100812187	probable isoaspartyl peptidase/L-asparaginase 2-like	gmx:100812187	Up	3.5.1.1					ncbi-geneid:547877	gmx:547877	asparagine synthetase
Aspartate	Glyma_05G007600	100782806	L-aspartate oxidase, chloroplastic	gmx:100782806	Up	1.4.3.16					ncbi-geneid:547895	gmx:547895	AS1; asparagine synthetase 1
	Glyma_19G159300	100787911	protein LIFEGUARD 4	gmx:100787911	Up						ncbi-geneid:100803038	gmx:100803038	probable isoaspartyl peptidase/L-asparaginase 2
	Glyma_02G015800	100813552	fumarate hydratase 1, mitochondrial	gmx:100813552	Down	4.2.1.2 TCA cycle	4.2.1.2 pyruvate metabolism				ncbi-geneid:100812187	gmx:100812187	probable isoaspartyl peptidase/L-asparaginase 2-like
	Glyma_14G111800	100811514	aspartate aminotransferase P2, mitochondrial	gmx:100811514	Down	2.6.1.1					ncbi-geneid:100782806	gmx:100782806	L-aspartate oxidase, chloroplastic
	Glyma_17G116500	100792806	broad specificity amino-acid racemase RacX	gmx:100792806	Down						ncbi-geneid:100787911	gmx:100787911	protein LIFEGUARD 4
Alanine	Glyma_18G116900	100786630	serine--glyoxylate aminotransferase-like	gmx:100786630	Up	2.6.1.44					ncbi-geneid:100813552	gmx:100813552	fumarate hydratase 1, mitochondrial
	Glyma_01G129400	100170733	alanine--glyoxylate aminotransferase 2 homolog 2, mitochondrial	gmx:100170733	Down	2.6.1.44					ncbi-geneid:100811514	gmx:100811514	aspartate aminotransferase P2, mitochondrial
	Glyma_03G040600	100170738	alanine--glyoxylate aminotransferase 2 homolog 3, mitochondrial	gmx:100170738	Down	2.6.1.44					ncbi-geneid:100792806	gmx:100792806	broad specificity amino-acid racemase RacX
	Glyma_07G247900	100781401	alanyl-tRNA editing protein AlaX-L-like	gmx:100781401	Down						ncbi-geneid:100786630	gmx:100786630	serine--glyoxylate aminotransferase-like
	Glyma_11G006500	NA	NA	NA	Down						ncbi-geneid:100170733	gmx:100170733	alanine--glyoxylate aminotransferase 2 homolog 2, mitochondrial
	Glyma_17G026200	NA	NA	NA	Down						ncbi-geneid:100170738	gmx:100170738	alanine--glyoxylate aminotransferase 2 homolog 3, mitochondrial
	Glyma_18G021000	NA	NA	NA	Down						ncbi-geneid:100781401	gmx:100781401	uncharacterized protein LOC100781401
Glutamate	Glyma_07G226400	100799966	glutamate receptor 2.8	gmx:100799966	Up						ncbi-geneid:100799966	gmx:100799966	glutamate receptor 2.8
	Glyma_10G213200	100807842	mitochondrial substrate carrier family protein C	gmx:100807842	Up						ncbi-geneid:100807842	gmx:100807842	mitochondrial substrate carrier family protein C
	Glyma_13G049700	100797464	proline dehydrogenase 2, mitochondrial	gmx:100797464	Up						ncbi-geneid:100797464	gmx:100797464	proline dehydrogenase 2, mitochondrial
	Glyma_13G093300	NA	NA	NA	Up						ncbi-geneid:100776933	gmx:100776933	glutamate receptor 2.7
	Glyma_13G172100	100776933	glutamate receptor 2.7	gmx:100776933	Up						ncbi-geneid:100818619	gmx:100818619	glutamate receptor 2.7
	Glyma_13G233400	100818619	glutamate receptor 2.7	gmx:100818619	Up						ncbi-geneid:100776794	gmx:100776794	dicarboxylate transporter 2.1, chloroplastic
	Glyma_15G055600	100776794	dicarboxylate transporter 2.1, chloroplastic	gmx:100776794	Up						ncbi-geneid:547643	gmx:547643	methionine synthase
	Glyma_16G038300	547643	methionine synthase	gmx:547643	Up						ncbi-geneid:100800978	gmx:100800978	proline dehydrogenase 2, mitochondrial
	Glyma_19G042900	100800978	proline dehydrogenase 2, mitochondrial	gmx:100800978	Up						ncbi-geneid:547749	gmx:547749	PDH; proline dehydrogenase
	Glyma_19G043000	547749	proline dehydrogenase	gmx:547749	Up						ncbi-geneid:100789509	gmx:100789509	uncharacterized protein LOC100789509
	Glyma_19G111000	100789509	glutamate dehydrogenase 1-like	gmx:100789509	Up	1.4.1.3					ncbi-geneid:100787911	gmx:100787911	protein LIFEGUARD 4
	Glyma_19G159300	100787911	protein LIFEGUARD 4	gmx:100787911	Up						ncbi-geneid:100807197	gmx:100807197	mitochondrial substrate carrier family protein C
	Glyma_20G177800	100807197	mitochondrial substrate carrier family protein C	gmx:100807197	Up						ncbi-geneid:100798598	gmx:100798598	ALDH18B1; delta-1-pyrroline-5-carboxylate synthase isoform X2
	Glyma_01G099800	100798598	delta-1-pyrroline-5-carboxylate synthase	gmx:100798598	Down	1.2.1.88					ncbi-geneid:100499724	gmx:100499724	FTCD_N superfamily protein
	Glyma_02G127600	100499724	FTCD_N superfamily protein	gmx:100499724	Down						ncbi-geneid:100797414	gmx:100797414	ALDH18B3; delta-1-pyrroline-5-carboxylate synthase
	Glyma_03G069400	100797414	delta-1-pyrroline-5-carboxylate synthase	gmx:100797414	Down						ncbi-geneid:100815931	gmx:100815931	glutamate synthase [NADH], amyloplastic isoform X1
	Glyma_04G236900	100815931	glutamate synthase [NADH], amyloplastic	gmx:100815931	Down	1.4.1.14					ncbi-geneid:100813821	gmx:100813821	ALDH12A2; probable aldehyde dehydrogenase isoform X2
	Glyma_05G029200	100813821	aldehyde dehydrogenase 12A2	gmx:100813821	Down						ncbi-geneid:732572	gmx:732572	ornithine aminotransferase
	Glyma_05G141900	732572	ornithine aminotransferase	gmx:732572	Down						ncbi-geneid:100792053	gmx:100792053	aspartate aminotransferase superfamily protein
	Glyma_08G076400	100792053	aspartate aminotransferase superfamily protein	gmx:100792053	Down						ncbi-geneid:100794163	gmx:100794163	cationic amino acid transporter 1
	Glyma_08G129600	100794163	cationic amino acid transporter 1	gmx:100794163	Down						ncbi-geneid:100796475	gmx:100796475	glutamate decarboxylase
	Glyma_09G168900	100796475	glutamate decarboxylase	gmx:100796475	Down	4.1.1.15					ncbi-geneid:100818078	gmx:100818078	glutamate receptor 2.7 isoform X1
	Glyma_13G233000	100818078	glutamate receptor 2.7	gmx:100818078	Down						ncbi-geneid:112997619	gmx:112997619	glutamate receptor 2.7-like isoform X1
	Glyma_13G233300	112997619	glutamate receptor 2.7-like	gmx:112997619	Down						ncbi-geneid:100807817	gmx:100807817	uncharacterized protein LOC100807817 precursor
	Glyma_17G067200	100807817	glutamate receptor 2.8-like	gmx:100807817	Down						ncbi-geneid:100792806	gmx:100792806	broad specificity amino-acid racemase RacX
	Glyma_17G116500	100792806	broad specificity amino-acid racemase RacX	gmx:100792806	Down						ncbi-geneid:100800925	gmx:100800925	probable amino-acid acetyltransferase NAGS1, chloroplastic
	Glyma_17G160300	100800925	probable amino-acid acetyltransferase NAGS1, chloroplastic	gmx:100800925	Down						ncbi-geneid:547953	gmx:547953	GS; glutamine synthetase nodule isozyme
	Glyma_18G041100	547953	glutamine synthetase nodule isozyme	gmx:547953	Down	6.3.1.2					ncbi-geneid:100794445	gmx:100794445	amino-acid permease BAT1 homolog isoform X1
	Glyma_20G121400	100794445	amino-acid permease BAT1 homolog	gmx:100794445	Down						ncbi-geneid:100818219	gmx:100818219	NADP-dependent malic enzyme isoform X3
	Glyma_U003600	NA	NA	NA	Down						ncbi-geneid:100801564	gmx:100801564	NADP-dependent malic enzyme isoform X3
Oxaloacetate	Glyma_04G086300	100818219	NADP-dependent malic enzyme	gmx:100818219	Up	1.1.1.40	pyruvate metabolism				ncbi-geneid:100785718	gmx:100785718	NADP-dependent malic enzyme
	Glyma_06G087800	100801564	NADP-dependent malic enzyme	gmx:100801564	Up	1.1.1.40	pyruvate metabolism				ncbi-geneid:100800844	gmx:100800844	NADP-dependent malic enzyme
	Glyma_08G201200	100785718	NADP-dependent malic enzyme	gmx:100785718	Up	1.1.1.40	pyruvate metabolism				ncbi-geneid:100791514	gmx:100791514	NADP-dependent malic enzyme
	Glyma_13G354900	100800844	NADP-dependent malic enzyme	gmx:100800844	Up	1.1.1.40	pyruvate metabolism				ncbi-geneid:100776794	gmx:100776794	dicarboxylate transporter 2.1, chloroplastic
	Glyma_15G019300	100791514	NADP-dependent malic enzyme	gmx:100791514	Up	1.1.1.40	pyruvate metabolism				ncbi-geneid:100796117	gmx:100796117	NADP-dependent malic enzyme
	Glyma_15G055600	100776794	dicarboxylate transporter 2.1, chloroplastic	gmx:100776794	Up
	Glyma_18G261800	NA	NA	NA	Up
	Glyma_01G008500	100796117	NADP-dependent malic enzyme	gmx:100796117	Down	1.1.1.40	pyruvate metabolism

## Sheet: Bottom_Up_KEGG_output
Supplementary Table 3: KEGG pathway mapping information for top-down and bottom-up analyses. "Genes" tabs provide input information for both analyses, which includes the KEGG ID conversion information. "Output" tabs provide the KEGG pathway Mapper Search output with all pathways (light green highlighting) and the corresponding genes from within each pathway that are DE between East- and West-grow…
gmx01100 Metabolic pathways - Glycine max (soybean) (30)
gmx:100170733 K00827 alanine--glyoxylate aminotransferase 2 homolog 2, mitochondrial
gmx:100170738 K00827 alanine--glyoxylate aminotransferase 2 homolog 3, mitochondrial
gmx:100782806 K00278 L-aspartate oxidase, chloroplastic
gmx:100785718 K00029 NADP-dependent malic enzyme
gmx:100786630 K00830 serine--glyoxylate aminotransferase-like
gmx:100789509 K00261 uncharacterized protein LOC100789509
gmx:100791514 K00029 NADP-dependent malic enzyme
gmx:100796117 K00029 NADP-dependent malic enzyme
gmx:100796475 K01580 glutamate decarboxylase
gmx:100797414 K12657 ALDH18B3; delta-1-pyrroline-5-carboxylate synthase
gmx:100797464 K00318 proline dehydrogenase 2, mitochondrial
gmx:100798318 K01953 asparagine synthetase [glutamine-hydrolyzing] 2
gmx:100798598 K12657 ALDH18B1; delta-1-pyrroline-5-carboxylate synthase isoform X2
gmx:100800844 K00029 NADP-dependent malic enzyme
gmx:100800925 K14682 probable amino-acid acetyltransferase NAGS1, chloroplastic
gmx:100800978 K00318 proline dehydrogenase 2, mitochondrial
gmx:100801564 K00029 NADP-dependent malic enzyme isoform X3
gmx:100803038 K13051 probable isoaspartyl peptidase/L-asparaginase 2
gmx:100811514 K00811 aspartate aminotransferase P2, mitochondrial
gmx:100812187 K13051 probable isoaspartyl peptidase/L-asparaginase 2-like
gmx:100813552 K01679 fumarate hydratase 1, mitochondrial
gmx:100813821 K00294 ALDH12A2; probable aldehyde dehydrogenase isoform X2
gmx:100815931 K00264 glutamate synthase [NADH], amyloplastic isoform X1
gmx:100818219 K00029 NADP-dependent malic enzyme isoform X3
gmx:547643 K00549 methionine synthase
gmx:547749 K00318 PDH; proline dehydrogenase
gmx:547877 K01953 asparagine synthetase
gmx:547895 K01953 AS1; asparagine synthetase 1
gmx:547953 K01915 GS; glutamine synthetase nodule isozyme
gmx:732572 K00819 ornithine aminotransferase
gmx01110 Biosynthesis of secondary metabolites - Glycine max (soybean) (20)
gmx:100170733 K00827 alanine--glyoxylate aminotransferase 2 homolog 2, mitochondrial
gmx:100170738 K00827 alanine--glyoxylate aminotransferase 2 homolog 3, mitochondrial
gmx:100786630 K00830 serine--glyoxylate aminotransferase-like
gmx:100796475 K01580 glutamate decarboxylase
gmx:100797414 K12657 ALDH18B3; delta-1-pyrroline-5-carboxylate synthase
gmx:100797464 K00318 proline dehydrogenase 2, mitochondrial
gmx:100798318 K01953 asparagine synthetase [glutamine-hydrolyzing] 2
gmx:100798598 K12657 ALDH18B1; delta-1-pyrroline-5-carboxylate synthase isoform X2
gmx:100800925 K14682 probable amino-acid acetyltransferase NAGS1, chloroplastic
gmx:100800978 K00318 proline dehydrogenase 2, mitochondrial
gmx:100803038 K13051 probable isoaspartyl peptidase/L-asparaginase 2
gmx:100811514 K00811 aspartate aminotransferase P2, mitochondrial
gmx:100812187 K13051 probable isoaspartyl peptidase/L-asparaginase 2-like
gmx:100813552 K01679 fumarate hydratase 1, mitochondrial
gmx:100815931 K00264 glutamate synthase [NADH], amyloplastic isoform X1
gmx:547643 K00549 methionine synthase
gmx:547749 K00318 PDH; proline dehydrogenase
gmx:547877 K01953 asparagine synthetase
gmx:547895 K01953 AS1; asparagine synthetase 1
gmx:732572 K00819 ornithine aminotransferase
gmx00250 Alanine, aspartate and glutamate metabolism - Glycine max (soybean) (15)
gmx:100170733 K00827 alanine--glyoxylate aminotransferase 2 homolog 2, mitochondrial
gmx:100170738 K00827 alanine--glyoxylate aminotransferase 2 homolog 3, mitochondrial
gmx:100782806 K00278 L-aspartate oxidase, chloroplastic
gmx:100786630 K00830 serine--glyoxylate aminotransferase-like
gmx:100789509 K00261 uncharacterized protein LOC100789509
gmx:100796475 K01580 glutamate decarboxylase
gmx:100798318 K01953 asparagine synthetase [glutamine-hydrolyzing] 2
gmx:100803038 K13051 probable isoaspartyl peptidase/L-asparaginase 2
gmx:100811514 K00811 aspartate aminotransferase P2, mitochondrial
gmx:100812187 K13051 probable isoaspartyl peptidase/L-asparaginase 2-like
gmx:100813821 K00294 ALDH12A2; probable aldehyde dehydrogenase isoform X2
gmx:100815931 K00264 glutamate synthase [NADH], amyloplastic isoform X1
gmx:547877 K01953 asparagine synthetase
gmx:547895 K01953 AS1; asparagine synthetase 1
gmx:547953 K01915 GS; glutamine synthetase nodule isozyme
gmx01230 Biosynthesis of amino acids - Glycine max (soybean) (10)
gmx:100797414 K12657 ALDH18B3; delta-1-pyrroline-5-carboxylate synthase
gmx:100798318 K01953 asparagine synthetase [glutamine-hydrolyzing] 2
gmx:100798598 K12657 ALDH18B1; delta-1-pyrroline-5-carboxylate synthase isoform X2
gmx:100800925 K14682 probable amino-acid acetyltransferase NAGS1, chloroplastic
gmx:100811514 K00811 aspartate aminotransferase P2, mitochondrial
gmx:100815931 K00264 glutamate synthase [NADH], amyloplastic isoform X1
gmx:547643 K00549 methionine synthase
gmx:547877 K01953 asparagine synthetase
gmx:547895 K01953 AS1; asparagine synthetase 1
gmx:547953 K01915 GS; glutamine synthetase nodule isozyme
gmx01200 Carbon metabolism - Glycine max (soybean) (9)
gmx:100785718 K00029 NADP-dependent malic enzyme
gmx:100786630 K00830 serine--glyoxylate aminotransferase-like
gmx:100789509 K00261 uncharacterized protein LOC100789509
gmx:100791514 K00029 NADP-dependent malic enzyme
gmx:100796117 K00029 NADP-dependent malic enzyme
gmx:100800844 K00029 NADP-dependent malic enzyme
gmx:100801564 K00029 NADP-dependent malic enzyme isoform X3
gmx:100813552 K01679 fumarate hydratase 1, mitochondrial
gmx:100818219 K00029 NADP-dependent malic enzyme isoform X3
gmx00330 Arginine and proline metabolism - Glycine max (soybean) (8)
gmx:100797414 K12657 ALDH18B3; delta-1-pyrroline-5-carboxylate synthase
gmx:100797464 K00318 proline dehydrogenase 2, mitochondrial
gmx:100798598 K12657 ALDH18B1; delta-1-pyrroline-5-carboxylate synthase isoform X2
gmx:100800978 K00318 proline dehydrogenase 2, mitochondrial
gmx:100811514 K00811 aspartate aminotransferase P2, mitochondrial
gmx:100813821 K00294 ALDH12A2; probable aldehyde dehydrogenase isoform X2
gmx:547749 K00318 PDH; proline dehydrogenase
gmx:732572 K00819 ornithine aminotransferase
gmx00620 Pyruvate metabolism - Glycine max (soybean) (7)
gmx:100785718 K00029 NADP-dependent malic enzyme
gmx:100791514 K00029 NADP-dependent malic enzyme
gmx:100796117 K00029 NADP-dependent malic enzyme
gmx:100800844 K00029 NADP-dependent malic enzyme
gmx:100801564 K00029 NADP-dependent malic enzyme isoform X3
gmx:100813552 K01679 fumarate hydratase 1, mitochondrial
gmx:100818219 K00029 NADP-dependent malic enzyme isoform X3
gmx00710 Carbon fixation in photosynthetic organisms - Glycine max (soybean) (6)
gmx:100785718 K00029 NADP-dependent malic enzyme
gmx:100791514 K00029 NADP-dependent malic enzyme
gmx:100796117 K00029 NADP-dependent malic enzyme
gmx:100800844 K00029 NADP-dependent malic enzyme
gmx:100801564 K00029 NADP-dependent malic enzyme isoform X3
gmx:100818219 K00029 NADP-dependent malic enzyme isoform X3
gmx00270 Cysteine and methionine metabolism - Glycine max (soybean) (4)
gmx:100170733 K00827 alanine--glyoxylate aminotransferase 2 homolog 2, mitochondrial
gmx:100170738 K00827 alanine--glyoxylate aminotransferase 2 homolog 3, mitochondrial
gmx:100811514 K00811 aspartate aminotransferase P2, mitochondrial
gmx:547643 K00549 methionine synthase
gmx00220 Arginine biosynthesis - Glycine max (soybean) (4)
gmx:100789509 K00261 uncharacterized protein LOC100789509
gmx:100800925 K14682 probable amino-acid acetyltransferase NAGS1, chloroplastic
gmx:100811514 K00811 aspartate aminotransferase P2, mitochondrial
gmx:547953 K01915 GS; glutamine synthetase nodule isozyme
gmx00260 Glycine, serine and threonine metabolism - Glycine max (soybean) (3)
gmx:100170733 K00827 alanine--glyoxylate aminotransferase 2 homolog 2, mitochondrial
gmx:100170738 K00827 alanine--glyoxylate aminotransferase 2 homolog 3, mitochondrial
gmx:100786630 K00830 serine--glyoxylate aminotransferase-like
gmx00910 Nitrogen metabolism - Glycine max (soybean) (3)
gmx:100789509 K00261 uncharacterized protein LOC100789509
gmx:100815931 K00264 glutamate synthase [NADH], amyloplastic isoform X1
gmx:547953 K01915 GS; glutamine synthetase nodule isozyme
gmx00630 Glyoxylate and dicarboxylate metabolism - Glycine max (soybean) (2)
gmx:100786630 K00830 serine--glyoxylate aminotransferase-like
gmx:547953 K01915 GS; glutamine synthetase nodule isozyme
gmx00460 Cyanoamino acid metabolism - Glycine max (soybean) (2)
gmx:100803038 K13051 probable isoaspartyl peptidase/L-asparaginase 2
gmx:100812187 K13051 probable isoaspartyl peptidase/L-asparaginase 2-like
gmx01210 2-Oxocarboxylic acid metabolism - Glycine max (soybean) (2)
gmx:100800925 K14682 probable amino-acid acetyltransferase NAGS1, chloroplastic
gmx:100811514 K00811 aspartate aminotransferase P2, mitochondrial
gmx00280 Valine, leucine and isoleucine degradation - Glycine max (soybean) (2)
gmx:100170733 K00827 alanine--glyoxylate aminotransferase 2 homolog 2, mitochondrial
gmx:100170738 K00827 alanine--glyoxylate aminotransferase 2 homolog 3, mitochondrial
gmx00410 beta-Alanine metabolism - Glycine max (soybean) (1)
gmx:100796475 K01580 glutamate decarboxylase
gmx00430 Taurine and hypotaurine metabolism - Glycine max (soybean) (1)
gmx:100796475 K01580 glutamate decarboxylase
gmx00020 Citrate cycle (TCA cycle) - Glycine max (soybean) (1)
gmx:100813552 K01679 fumarate hydratase 1, mitochondrial
gmx00950 Isoquinoline alkaloid biosynthesis - Glycine max (soybean) (1)
gmx:100811514 K00811 aspartate aminotransferase P2, mitochondrial
gmx00350 Tyrosine metabolism - Glycine max (soybean) (1)
gmx:100811514 K00811 aspartate aminotransferase P2, mitochondrial
gmx00450 Selenocompound metabolism - Glycine max (soybean) (1)
gmx:547643 K00549 methionine synthase
gmx00760 Nicotinate and nicotinamide metabolism - Glycine max (soybean) (1)
gmx:100782806 K00278 L-aspartate oxidase, chloroplastic
gmx00650 Butanoate metabolism - Glycine max (soybean) (1)
gmx:100796475 K01580 glutamate decarboxylase
gmx04146 Peroxisome - Glycine max (soybean) (1)
gmx:100786630 K00830 serine--glyoxylate aminotransferase-like
gmx00960 Tropane, piperidine and pyridine alkaloid biosynthesis - Glycine max (soybean) (1)
gmx:100811514 K00811 aspartate aminotransferase P2, mitochondrial
gmx00400 Phenylalanine, tyrosine and tryptophan biosynthesis - Glycine max (soybean) (1)
gmx:100811514 K00811 aspartate aminotransferase P2, mitochondrial
gmx00360 Phenylalanine metabolism - Glycine max (soybean) (1)
gmx:100811514 K00811 aspartate aminotransferase P2, mitochondrial
gmx01240 Biosynthesis of cofactors - Glycine max (soybean) (1)
gmx:100782806 K00278 L-aspartate oxidase, chloroplastic
gmx00564 Glycerophospholipid metabolism - Glycine max (soybean) (1)
gmx:100792053 K25193 aspartate aminotransferase superfamily protein
