# Supplementary material for: Differential gene expression provides leads to environmentally regulated soybean seed protein content
Source: Front Plant Sci. 2023 Sep 18;14:1260393. doi: 10.3389/fpls.2023.1260393 (PMC10544915; doi:10.3389/fpls.2023.1260393)
Supplement: Supplementary file 4 [file Table_4.xlsx]

## Sheet: QTL
Supplementary Table 4: MapChart chromosome map data for G. max chromosomes 1-20. All positions are given in cM. DE genes (bottom-up) are highlighted in yellow; overlapping gene and QTL regions are highlighted in green. Sat marker information is included in this sheet, but not shown on the QTL maps in Figure 6. QTL positional information is given as a range or a single point on the chomosome (data…
Group	GM1
Start	0						Colour code	Corresponding information
Sat_332	355570						c1	other
Glyma.01G008500	827132	c6					c2	asparagine
Seedaminoacids1-g8	989187	c3					c3	protein QTL
Seedaminoacids1-g18.1	989187	c3					c4	aspartate
Seedaminoacids1-g27	989187	c3					c5	NA
Seedaminoacids1-g18.2	989204	c3					c6	oxaloacetate
Seed-linolenic-4-g1	1389286	c10					c7	glutamate
Seedaminoacids1-g19	2181558	c3					c8	alanine
Satt531	3779070						c9	NA
Seed-linolenic-4-g2	7722749	c10					c10	lipid QTL
Seed-protein7-g17	9126914	c3
Glyma.01G099800	33261108	c7
Seed-linolenic-4-g3	33989570	c10
Seed-protein10-g1	42371693	42371693	42555910	42555910	c3
Glyma.01G129400	44326500	c8
Satt198	49435179
SeedTrp1-g1	51679239	c3
Satt407	53174848
Seedaminoacids1-g1.1	53486467	c3
Seedaminoacids1-g9.1	53486467	c3
Seedaminoacids1-g20.1	53486467	c3
Seedaminoacids1-g28.1	53486467	c3
Seedaminoacids1-g9.2	53486490	c3
Seedaminoacids1-g14	53486490	c3
Seedaminoacids1-g1.2	53486650	c3
Seedaminoacids1-g9.3	53486686	c3
Seedaminoacids1-g20.2	53486686	c3
Seedaminoacids1-g28.2	53486686	c3
Satt147	54828484
Satt129	55166202
Seed-oil-3-g5	55166202	55166202	55166350	55166350	c10
Seed-palmitic-1-g4	55166202	55166202	55166350	55166350	c10
Seed-oleic-1-g6	55166202	55166202	55166350	55166350	c10
Seed-linoleic-1-g5	55166202	55166202	55166350	55166350	c10
End	56831624
Group	GM2
Start	0
Seed-linolenic-2-g1	573749	c10
Seed-linolenic-2-g2	578327	c10
Glyma.02G015800	1423523	c4
Seed-protein-9-g1	1885994	1885994	3106138	3106138	c3
Sat_279	2005085
Satt216	4104651
Seed-oleic-1-g7	4104651	4104651	4104841	4104841	c10
Seed-linoleic-1-g6	4104651	4104651	4104841	4104841	c10
Seed-oil-11-g1	5079777	5079777	6270318	6270318	c10
Satt698	8827384
Satt558	10619681
SeedTrp1-g5	11045403	c3
Glyma.02G127600	12976382	c7
SeedTrp1-g6	13098947	c3
Satt542	13316369
Seed-linolenic-4-g4	14305817	c10
Seed-protein-9-g2	14764422	14764422	15058707	15058707	c3
Seed-long-chain-fatty-acid-1-g6.1	19851000	c10
Seed-long-chain-fatty-acid-1-g11.1	19851000	c10
Seed-stearic-1-g1.1	19886706	c10
Seed-long-chain-fatty-acid-1-g6.2	19886706	c10
Seed-long-chain-fatty-acid-1-g11.2	19951148	c10
Seed-stearic-1-g1.2	19955907	c10
Seed-long-chain-fatty-acid-1-g11.3	19961433	c10
Seed-stearic-1-g1.3	19985370	c10
Seed-long-chain-fatty-acid-1-g6.3	19997509	c10
Seed-oleic-1-g9	29355267	29355267	29355465	29355465	c10
Seed-linoleic-1-g7	29355267	29355267	29355465	29355465	c10
Satt350	36833446
SeedTrp1-g7	39504882	c3
Seed-linoleic-2-g1	39934224	c10
Seed-linoleic-2-g2	39940256	c10
Seed-protein-10-g2	40793724	40793724	41072417	41072417	c3
Sat_183	44317044
Seed-oleic-1-g8	45267040	45267040	45267222	45267222	c10
Seed-oil-to-protein-ratio1-g1	45869612	c10
Sat_415	47039676
Sat_283	48330383
End	48577505
Group	GM3
Start	0
Sct_195	323489
cqSeedprotein-010	459362	459362	3021266	3021266	c3
Seed-long-chain-fatty-acid-1-g12	4003522	c10
Glyma.03G040600	5113019	c8
cqSeedprotein-004	5664735	5664735	7607551	7607551	c3
Satt530	5669644
Seed-palmitic-1-g22	5669644	5669644	5669877	5669877	c10
Satt584	9227956
Seed-long-chain-fatty-acid-1-g7.1	12500458	c10
Seed-stearic-1-g2.1	12501628	c10
Seed-long-chain-fatty-acid-1-g13.1	12525686	c10
Seed-long-chain-fatty-acid-1-g7.2	12702388	c10
Seed-stearic-1-g2.2	12704607	c10
Seed-long-chain-fatty-acid-1-g13.2	12917268	c10
Seed-stearic-1-g2.3	12954110	c10
Seed-long-chain-fatty-acid-1-g13.3	12958942	c10
Seed-long-chain-fatty-acid-1-g7.3	12989558	c10
Glyma.03G069400	14507722	c7
Satt125	18415520
Sat_275	29862641
Sat_280	32670432
Seed-oleic-1-g31	33418861	33418861	33419014	33419014	c10
Seed-linoleic-1-g24	33418861	33418861	33419014	33419014	c10
Seed-oil-3-g14	34016929	34016929	34017143	34017143	c10
Sat387	34554705
Seed-oleic-1-g32	34554705	34554705	34554909	34554909	c10
Seed-linoleic-1-g25	34554705	34554705	34554909	34554909	c10
Seed-oil-7-g1	34839051	c10
Seed-protein7-g1	35747380	c3
Satt521	36674235
Seed-linoleic-4-g1	38642636	c10
Satt234	40168335
Seed-oil-2-g2	41369223	c10
Satt257	41520601
SeedArg1-g7	42377248	c3
Seed-oil-8-g1	42377248	c10
Seed-oleic-4-g1	45210725	c10
End	45779781
Group	GM4
Start	0
Satt690	486057
Seed-long-chain-fatty-acid-1-g4.1	2101652	c10
Seed-long-chain-fatty-acid-1-g4.2	2120885	c10
Seed-long-chain-fatty-acid-1-g4.3	2126907	c10
Satt197	2460783
Glyma.04G042100	3384562	c2
Sat_337	4221947
Seed-alpha-linolenic-acid-1-g1.1	5365622	c10
Seed-alpha-linolenic-acid-1-g1.2	5369762	c10
Glyma.04G086300	7340889	c6
SeedTrp1-g8	7646745	c3
Seed-linolenic-1-g4	7891669	7891669	7891823	7891823	c10
Satt646	8907780
Seed-oleic-4-g2	12610957	c10
Sat_404	13613713
Seed-linolenic-4-g9	14148105	c10
Sat_322	20202375
Satt361	32617784
Sat_416	40624709
Seed-oil-3-g1	43305171	43305171	43305451	43305451	c10
Seed-palmitic-1-g3	43305171	43305171	43305451	43305451	c10
Seed-oleic-1-g5	43305171	43305171	43305451	43305451	c10
Seed-linoleic-1-g4	43305171	43305171	43305451	43305451	c10
Seed-linolenic-1-g3	43305171	43305171	43305451	43305451	c10
Sat_042	44370764
Seed-protein-10-g3	44592458	44592458	45008840	45008840	c3
Satt670	45716417
Satt311	46184435
Seed-protein-10-g4	48435528	48435528	49024152	49024152	c3
Seed-protein7-g3	49328573	c3
Satt682	50466758
Glyma.04G236900	50545450	c7
End	52389146
Group	GM5
Start	0
Glyma.05G007600	717221	c4
Seed-palmitic-2-g1.1	925502	c10
Seed-long-chain-fatty-acid-1-g1.1	925502	c10
Seed-long-chain-fatty-acid-1-g19.1	925502	c10
Seed-long-chain-fatty-acid-1-g21.1	925502	c10
Seed-palmitic-4-g1	1049939	c10
Seed-palmitic-2-g1.2	1050109	c10
Seed-long-chain-fatty-acid-1-g21.2	1050109	c10
Seed-long-chain-fatty-acid-1-g19.2	1095346	c10
Seed-long-chain-fatty-acid-1-g14.1	1116077	c10
Seed-long-chain-fatty-acid-1-g14.2	1120475	c10
Seed-long-chain-fatty-acid-1-g1.2	1140198	c10
Seed-stearic-3-g1	1180877	c10
Seed-palmitic-5-g2	1419695	c10
Seed-palmitic-5-g1	1474724	c10
Seed-long-chain-fatty-acid-1-g21.3	1476699	c10
Seed-palmitic-2-g1.3	1476699	c10
Seed-long-chain-fatty-acid-1-g1.3	1476699	c10
Seed-long-chain-fatty-acid-1-g19.3	1476699	c10
Seed-long-chain-fatty-acid-1-g2.1	1692088	c10
Seed-long-chain-fatty-acid-1-g2.2	1701656	c10
Seed-long-chain-fatty-acid-1-g20.1	1701656	c10
Seed-long-chain-fatty-acid-1-g20.2	1715940	c10
Seed-long-chain-fatty-acid-1-g2.3	1716595	c10
Glyma.05G029200	2510682	c7
Sat_137	2671161
Seed-linoleic-5-g1	3632900	3632900	4450269	4450269	c10
Satt276	5158623
Seed-protein-7-g4	7354669	c3
Satt248	20147198
Seed-linolenic-5-g1	25595388	25595388	26989458	26989458	c10
Satt454	25682103
Seed-oil-8-g2	29109248	c10
Seed-oil-5-g1	31380926	c10
Seed-protein-4-g1	31380926	c3
Glyma.05G141900	33519063	c7
Satt648	34428904
Satt619	35971621
Seed-oleic-3-g1	37237915	c10
Seed-linoleic-5-g2	37459856	37459856	39853048	39853048	c10
Seed-protein-10-g5	38330071	38330071	38993543	38993543	c3
Seed-oil-9-g1	40772548	40772548	40772608	40772608	c10
cqSeedprotein-014	41265253	41265253	41913096	41913096	c3
Seed-oil-8-g3	41524771	c10
Sat_217	41679029
Seed-oil-4-g18	41780982	c10
Seed-oil-4-g17	41807117	c10
Seed-oil-4-g16	41831154	c10
Seed-oil-6-g1	41843996	c10
Seed-linolenic-4-g5	41853191	c10
Seed-oil-4-g15	41854786	c10
Seed-oil-4-g14	41855235	c10
Seed-oil-6-g2	41876457	c10
Seed-oil-8-g4	41883826	c10
BARC-029787-06340	41912388
Seed-oil-8-g5	41925052	c10
Seed-oil-8-g6	42119049	c10
End	42234498
Group	GM6
Start	0
Seed-protein-10-g6	19074	19074	699413	699413	c3
Satt688	493720
SeedTrp1-g9	1446085	c3
Seed-oil-3-g3	4256231	4256231	4256374	4256374	c10
Seed-palmitic-3-g1	5303094	c10
cqSeedprotein-015	5406773	5406773	7326455	7326455	c3
cqSeedprotein-005	5449370	5449370	6085236	6085236	c3
cqSeedprotein-007	5504147	5504147	6529270	6529270	c3
Seed-protein3-g17	5597303	c3
SeedLys1-g3	5631766	c3
Seed-protein3-g18	5666361	c3
SeedAsp1-g1	6079473	c3
SeedCys1-g1	6079473	c3
SeedGlu1-g1	6079473	c3
SeedLys1-g1	6079473	c3
SeedPhe1-g1	6079473	c3
Satt432	6293758
Seed-oil-3-g4	6529270	6529270	6529452	6529452	c10
Glyma.06G087800	6788436	c6
Seed-linoleic-4-g2	8208575	c10
Seed-oleic-4-g3	8208575	c10
Seed-protein-10-g7	9128442	9128442	11029737	11029737	c3
Seed-protein-9-g3	10211244	10211244	10523550	10523550	c3
SeedMet1-g1	10277748	c3
Satt305	11336632
Seed-oil-8-g7	16753615	c10
Satt277	17218677
SeedIle2-g4	17303614	c3
SeedLys2-g5	17303614	c3
SeedSer2-g2	17303614	c3
SeedThr2-g2	17303614	c3
SeedArg1-g8	18229973	c3
cqSeedprotein-012	21583831	21583831	47516523	47516523	c3
Seed-linoleic-4-g3	22813330	c10
Satt489	23848501
Seed-protein7-g5	24331080	c3
Seed-protein-10-g8	30639643	30639643	33589987	33589987	c3
Satt100	31490622
Satt319	38049354
SeedAsp2-g8	38527121	c3
SeedLeu2-g5	38527121	c3
SeedTyr2-g4	38527121	c3
SeedTrp1-g10	39693408	c3
SeedTrp1-g11	40410008	c3
Satt460	44049891
Seed-palmitic-4-g2	45759234	c10
Seed-protein3-g19	46571984	c3
Satt357	50509593
Seed-palmitic-2-g2	50581961	c10
Seed-long-chain-fatty-acid-1-g22	50581961	c10
End	51416486
Group	GM7
Start	0
Sat_389	164905
Seed-oil-10-g1	644250	644250	854576	854576	c10
Satt636	1203910
Satt150	2434259
Seed-palmitic-2-g3.1	2438597	c10
Seed-long-chain-fatty-acid-1-g23.1	2438597	c10
Seed-palmitic-2-g3.2	2439024	c10
Seed-long-chain-fatty-acid-1-g23.2	2439024	c10
cqSeedprotein-006	2491792	2491792	8032843	8032843	c3
Sat_316	2722369
Seed-oil-8-g8	3363285	c10
Seed-protein7-g18	3512352	c3
SeedArg1-g9	3713267	c3
SeedAsp1-g3	3713267	c3
SeedTrp1-g12	3713267	c3
Seed-oil-8-g9	3713267	c10
Seed-oil-8-g10	3879026	c10
Seed-palmitic-1-g21	5010696	5010696	5010849	5010849	c10
Seed-oleic-1-g30	5010696	5010696	5010849	5010849	c10
cqSeedprotein-009	6443468	6443468	8032843	8032843	c3
Seed-palmitic-1-g15	8233953	8233953	8234168	8234168	c10
Seed-oleic-1-g24	8233953	8233953	8234168	8234168	c10
Seed-linoleic-1-g20	8233953	8233953	8234168	8234168	c10
Seed-linolenic-1-g11	8233953	8233953	8234168	8234168	c10
Seed-oil-3-g13	8283245	8283245	8283465	8283465	c10
Satt323	10465123
Seed-linoleic-2-g3	11583818	c10
Seed-linoleic-2-g4	11585435	c10
Seed-linoleic-2-g5	11592528	c10
Seed-linoleic-2-g6	11602073	c10
Seed-oleic-2-g1	11602867	c10
Seed-linoleic-2-g7	11602867	c10
Seed-linoleic-2-g8	11756395	c10
Satt702	12389318
Satt494	16521027
Seed-palmitic-5-g3	18944059	18944059	18944060	18944060	c10
Satt551	37079608
Seed-palmitic-3-g2	37910629	c10
Glyma.07G226400	40375232	c7
Glyma.07G247900	42635499	c8
Seed-oil-3-g12	42822283	42822283	42822449	42822449	c10
Glyma.07G257700	43386153	c2
Sat_359	43601402
End	44630646
Group	GM8
Start	0
Sat_383	183140
Seed-oil-8-g11	1831400	c10
Glyma.08G076400	5820082	c7
Satt315	6756953
Seed-oil-11-g2	7525742	7525742	9439751	9439751	c10
Seed-oil-8-g12	7792075	c10
SeedArg1-g10	7792075	c3
SeedAsp1-g4	7792075	c3
Seed-palmitic-4-g3	7814240	c10
SeedAsp1-g5	8275463	c3
SeedGly1-g1	8275463	c3
SeedGly1-g3	8275463	c3
SeedLys1-g4	8275463	c3
SeedPhe1-g3	8275463	c3
SeedSer1-g1	8275463	c3
SeedTrp1-g2	8275463	c3
SeedTrp1-g13	8275463	c3
SeedTrp1-g14	8390056	c3
Seed-oleic-3-g2	8656957	c10
Seed-protein7-g19	8673386	c3
cqSeedprotein-013	8223512	8223512	8630159	8630159	c3
cqSeedprotein-016	8223512	8223512	8937354	8937354	c3
Seed-oil-8-g13	9187715	c10
Sat_215	9204446
SeedArg1-g1	9219372	c3
SeedAla1-g1	9322287	c3
SeedArg1-g11	9322287	c3
SeedGly1-g2	9322287	c3
SeedLys1-g5	9322287	c3
SeedSer1-g2	9322287	c3
SeedThr1-g1	9322287	c3
SeedTyr1-g1	9322287	c3
SeedVal1-g1	9322287	c3
Seed-linolenic-4-g6	9509825	c10
Glyma.08G129600	9973588	c7
Seed-linoleic-4-g4	10246027	c10
Satt424	10633645
SeedTrp1-g15	12226566	c3
Seed-linoleic-4-g5	12529844	c10
Seed-oleic-4-g4	12529844	c10
Seed-linoleic-4-g6	12571266	c10
SeedTrp1-g16	14476806	c3
Glyma.08G201200	16282204	c6
Satt377	16361908
Seed-oil-8-g14	18035780	c10
Sat_250	18611762
SeedHis1-g1	20248624	c3
Satt707	23584494
Seedaminoacids1-g2.1	35266140	c3
Seedaminoacids1-g10.1	35266140	c3
Seedaminoacids1-g21.1	35266140	c3
Seedaminoacids1-g29.1	35266140	c3
Seedaminoacids1-g2.2	35266158	c3
Seedaminoacids1-g10.2	35266158	c3
Seedaminoacids1-g2.3	35266324	c3
Seedaminoacids1-g10.3	35266324	c3
Seedaminoacids1-g21.2	35266324	c3
Seedaminoacids1-g29.2	35266324	c3
Satt470	35805011
Satt209	42190891
Seed-protein-10-g9	43864875	43864875	43896183	43896183	c3
Seed-oil-5-g2	46415576	c10
Seed-protein4-g2	46415576	c3
Satt429	47217842
Seed-palmitic-1-g1	47217842	47217842	47218105	47218105	c10
End	47837940
Group	GM9
Start	0
Satt715	376556
SeedGlu2-g5	2824541	c3
SeedPro2-g1	2824541	c3
Satt178	6912664
SeedAla2-g3	7879934	7879934	7880124	7880124	c3
Seed-palmitic-5-g4	9655634	c10
Seed-protein7-g6	11091462	c3
Satt544	11261508
Satt518	13085314
Satt337	21181211
Satt628	29930218
Seed-palmitic-1-g16	31170289	31170289	31170405	31170405	c10
Seed-oleic-1-g26	31170289	31170289	31170405	31170405	c10
Seedaminoacids1-g3	33309127	c3
Seedaminoacids1-g11	33309127	c3
Seedaminoacids1-g22	33309127	c3
Seedaminoacids1-g30	33309127	c3
SeedVal2-g3	36964799	c3
Satt559	37762644
Glyma.09G168900	39359163	c7
SeedAla2-g2	39520353	c3
SeedIle2-g2	39520353	c3
SeedLeu2-g2	39520353	c3
SeedLys2-g2	39520353	c3
SeedSer2-g1	39520353	c3
SeedThr2-g1	39520353	c3
SeedTyr2-g2	39520353	c3
SeedLeu2-g4	42738613	c3
SeedThr2-g4	42738613	c3
SeedVal2-g4	42738613	c3
SeedAsp2-g4	43212388	c3
SeedGlu2-g3	43212388	c3
SeedHis1-g2	43212388	c3
SeedHis2-g1	43212388	c3
Seed-linoleic-2-g9	44197487	c10
Seed-palmitic-1-g17	46515608	46515608	46515796	46515796	c10
Seed-oleic-1-g27	46515608	46515608	46515796	46515796	c10
Seed-linoleic-1-g22	46515608	46515608	46515796	46515796	c10
Satt855	48619194
End	50189764
Group	GM10
Start	0
Sat_196	174602
Seed-protein4-g3	1330775	c3
Seed-palmitic-1-g24	1395587	1395587	1395790	1395790	c10
Seed-oleic-1-g33	1395587	1395587	1395790	1395790	c10
Seed-linoleic-1-g26	1395587	1395587	1395790	1395790	c10
Seed-linolenic-1-g13	1395587	1395587	1395790	1395790	c10
Seed-oil-5-g3	1815850	c10
SeedLeu1-g1	1829221	c3
SeedTrp1-g3	1829221	c3
Seedaminoacids1-g26.1	2400625	c3
Seedaminoacids1-g26.2	2415581	c3
Seedaminoacids1-g6.1	2422267	c3
Seedaminoacids1-g6.2	2428789	c3
Seedaminoacids1-g6.3	2436611	c3
Seedaminoacids1-g15	2436611	c3
Sat_321	2479421
Seed-palmitic-6-g1	5940510	5940510	9981243	9981243	c10
SeedLeu2-g6	9075599	c3
Satt345	12355353
Seed-palmitic-1-g23	12355353	12355353	12355600	12355600	c10
Satt608	21635044
Satt550	25055408
Satt188	30401139
SeedArg1-g2	36801502	c3
Satt563	38715763
SeedGly1-g4	40818239	c3
Seed-protein7-g7	41037780	c3
SeedSer2-g3	42861060	c3
Seed-oil-10-g2	43420093	43420093	43594838	43594838	c10
Satt592	43509732
Glyma.10G213200	44561442	c7
Satt581	44713925
Seed-linoleic-4-g7	45026735	c10
Seed-long-chain-fatty-acid-1-g17	45310798	c10
SeedAsp2-g5	47819090	c3
SeedIle2-g5	47819090	c3
SeedThr2-g3	47819090	c3
BARC-029629-06265	50903775
Sat_231	51294894
End	51566898
Group	GM11
Start	0
Glyma.11G006500	459361	c8
SeedHis1-g3	1530847	c3
Sat_270	4234362
Satt251	6906465
Sat_149	10003026
Seed-long-chain-fatty-acid-1-g5.1	10795759	c10
Seed-long-chain-fatty-acid-1-g5.2	10826709	c10
Seed-long-chain-fatty-acid-1-g5.3	10876169	c10
Seed-linoleic-5-g4	10969418	10969418	25595388	25595388	c10
Seed-protein7-g8	14314153	c3
Seed-oil-2-g5	15402057	c10
BARC-041167-07925	17414835
Glyma.11G170300	18242402	c2
Glyma.11G171400	18518857	c2
Satt430	18739388
Satt597	27036582
Satt665	31753982
Seed-oleic-1-g1	31753982	31753982	31754238	31754238	c10
Seed-linoleic-1-g1	31753982	31753982	31754238	31754238	c10
Seed-linolenic-1-g1	31753982	31753982	31754238	31754238	c10
Seed-protein7-g9	33013040	c3
Seed-protein7-g20	33013040	c3
SeedAsp1-g6	33670325	c3
Satt453	34173104
End	34766867
Seed-linoleic-5-g3	38521546	38521546	40703023	40703023	c10
Seed-oleic-5-g1	42197931	42197931	43351678	43351678	c10
Group	GM12
Start	0
Sat_200	272301
Seed-palmitic-5-g5	823423	c10
Seed-protein-10-g10	924424	924424	1147989	1147989	c3
Seed-protein7-g21	2579793	c3
Seed-protein-10-g11	3518939	3518939	3666689	3666689	c3
Satt442	6390806
Satt469	12362818
Satt314	24403661
Satt629	33769619
Seed-protein7-g10	33998087	c3
Seed-oil-10-g3	34432163	34432163	36321014	36321014	c10
Satt317	36570573
Seed-oil-2-g4	36641715	c10
Seed-protein7-g22	36908641	c3
Satt434	38428476
End	40491314
Group	GM13
Start	0
Satt649	1225665
Seedaminoacids1-g4.1	2546775	c3
Seedaminoacids1-g12.1	2546775	c3
Seedaminoacids1-g23.1	2546775	c3
Seedaminoacids1-g31.1	2546775	c3
Seedaminoacids1-g4.2	2546862	c3
Seedaminoacids1-g7	2546862	c3
Seedaminoacids1-g16	2546862	c3
Seedaminoacids1-g23.2	2546862	c3
Seedaminoacids1-g31.2	2546862	c3
Seedaminoacids1-g12.2	2546862	c3
Seed-linoleic-1-g12	10248427	10248427	10248637	10248637	c10
Seed-linolenic-1-g7	10248427	10248427	10248637	10248637	c10
Seed-oleic-1-g15	10248427	10248427	10248637	10248637	c10
Seed-palmitic-1-g8	10248427	10248427	10248637	10248637	c10
Satt569	12294072
Seed-long-chain-fatty-acid-1-g3.1	14070515	c10
Seed-long-chain-fatty-acid-1-g3.2	14109681	c10
Seed-long-chain-fatty-acid-1-g3.3	14114485	c10
Glyma.13G049700	14561058	c7
Satt145	15293144
SeedTyr1-g3	16254965	c3
SeedAsp1-g7	16286313	c3
Satt149	16855019
Satt160	17875691
Glyma.13G093300	20831880	c7
Seed-palmitic-6-g2	21775452	21775452	26808449	26808449	c10
Seed-protein7-g11	24579235	c3
Satt663	25936631
Seed-protein3-g16	26343911	c3
Seed-oil-to-protein-ratio-2-g3	28143152	28143152	28207736	28207736	c10
Seed-protein-10-g12	28227783	28227783	28254683	28254683	c3
Glyma.13G172100	28608195	c7
Seed-palmitic-1-g7	29609521	29609521	29609720	29609720	c10
Satt510	31802559
Seed-protein7-g23	32200499	c3
Seed-oleic-1-g14	32721481	32721481	32721640	32721640	c10
Seed-linoleic-1-g11	32721481	32721481	32721640	32721640	c10
Glyma.13G233000	34395264	c7
Glyma.13G233300	34408671	c7
Glyma.13G233400	34416323	c7
Seed-linoleic-1-g13	34767428	34767428	34767721	34767721	c10
Seed-oleic-1-g16	34767428	34767428	34767721	34767721	c10
Seed-oil-2-g1	35194140	c10
Satt490	36699189
SeedAsp2-g2	36964799	c3
SeedGlu2-g2	36964799	c3
SeedIle2-g3	36964799	c3
SeedLeu2-g3	36964799	c3
SeedLys2-g3	36964799	c3
SeedVal2-g2	36964799	c3
SeedAsp2-g3	36995772	c3
SeedLys2-g4	37214144	c3
Glyma.13G279200	38036685	c2
Seed-oil-10-g4	39185147	39185147	39577281	39577281	c10
Satt522	40131770
Sat_417	43307815
Seed-oil-8-g15	43777586	c10
SeedArg1-g12	43777586	c3
Glyma.13G354900	44343888	c6
End	45874162
Group	GM14
Start	0
Seed-oil-5-g4	65161	c10
Seed-protein4-g4	126916	c3
Seed-stearic-5-g1	416125	416125	1194103	1194103	c10
Satt577	675214
Sat_177	971811
Satt126	5020200
Seedaminoacids1-g5.1	5055466	c3
Seedaminoacids1-g13.1	5055466	c3
Seedaminoacids1-g24.1	5055466	c3
Seedaminoacids1-g32.1	5055466	c3
Seedaminoacids1-g5.2	5055474	c3
Seedaminoacids1-g13.2	5055474	c3
Seedaminoacids1-g24.2	5055474	c3
Seedaminoacids1-g32.2	5055474	c3
Satt467	6480095
Seed-protein7-g12	7819955	c3
Sct_034	7922227
SeedTrp1-g17	10057919	c3
Glyma.14G111800	12842409	c4
Satt304	13086766
Seed-long-chain-fatty-acid-1-g8.1	14985465	c10
Seed-long-chain-fatty-acid-1-g15.1	15191684	c10
Seed-stearic-1-g3.1	15199586	c10
Seed-stearic-5-g3	16340653	16340653	40457980	40457980	c10
Sat_189	16352945
Seed-stearic-4-g1	16752071	c10
Seed-long-chain-fatty-acid-1-g15.2	17083726	c10
Seed-oleic-1-g2	17406101	17406101	17406274	17406274	c10
Seed-linoleic-1-g2	17406101	17406101	17406274	17406274	c10
Seed-stearic-1-g3.2	17456087	c10
Seed-long-chain-fatty-acid-1-g8.2	17456087	c10
Seed-palmitic-4-g4	17499955	c10
Seed-stearic-3-g2	17499955	c10
Seed-stearic-2-g1	17499955	c10
Seed-stearic-4-g2	17500142	c10
Seed-stearic-2-g2	17561477	c10
Satt122	17619136
Seed-stearic-1-g3.3	19630147	c10
Seed-long-chain-fatty-acid-1-g15.3	19630147	c10
Seed-long-chain-fatty-acid-1-g8.3	19660594	c10
Seed-linolenic-2-g3	22514991	c10
Seed-palmitic-3-g3	22537916	c10
Seed-oleic-2-g2	22537916	c10
Seed-linolenic-2-g4	22537916	c10
Seed-protein5-g1	24367698	c3
Satt601	31284724
Seed-stearic-5-g2	32185160	32185160	37466820	37466820	c10
Seed-linolenic-5-g2	33788862	33788862	35440153	35440153	c10
Seed-long-chain-fatty-acid-1-g9.1	34208617	c10
Seed-long-chain-fatty-acid-1-g16.1	34381036	c10
Seed-stearic-1-g4.1	34771615	c10
Seed-palmitic-4-g5	35662926	c10
Seed-stearic-1-g4.2	39684297	c10
Seed-long-chain-fatty-acid-1-g9.2	39684297	c10
Seed-long-chain-fatty-acid-1-g16.2	39684297	c10
Seed-stearic-1-g4.3	40356659	c10
Seed-long-chain-fatty-acid-1-g16.3	40409746	c10
Seed-stearic-3-g3	40524189	c10
Seed-long-chain-fatty-acid-1-g9.3	40536866	c10
Seed-oil-8-g16	44417018	c10
Satt534	45041539
Seed-oleic-1-g4	45041539	45041539	45041723	45041723	c10
Seed-linoleic-1-g3	45041539	45041539	45041723	45041723	c10
Seed-long-chain-fatty-acid-1-g18.1	45907223	c10
Seed-alpha-linolenic-acid-1-g2.1	45909173	c10
Seed-long-chain-fatty-acid-1-g10.1	45927234	c10
Seed-long-chain-fatty-acid-1-g18.2	45938204	c10
seed-linolenic-3-g1	45971865	c10
Seed-alpha-linolenic-acid-1-g2.2	45985528	c10
Seed-long-chain-fatty-acid-1-g10.2	45985528	c10
Seed-alpha-linolenic-acid-1-g2.3	46019811	c10
Seed-long-chain-fatty-acid-1-g18.3	46067489	c10
Seed-palmitic-4-g6	46215024	c10
Seed-oleic-3-g3	47398552	c10
BARC-030661-06917	48282128
End	49042192
Group	GM15
Start	0
Glyma.15G019300	1488374	c6
cqSeedprotein-008	1540857	1540857	2127717	2127717	c3
Seed-linolenic-5-g3	2365862	2365862	3632900	3632900	c10
Satt411	2517404
Seed-oil-11-g4	2801295	2801295	5633343	5633343	c10
Seed-linolenic-3-g2	2831678	c10
Seed-palmitic-6-g3	3002525	3002525	4148354	4148354	c10
Seed-palmitic-4-g7	3032666	c10
SeedTrp1-g18	3032666	c3
Seed-protein-9-g4	3438388	3438388	3955219	3955219	c3
Seed-linolenic-5-g4	3632900	3632900	5438746	5438746	c10
Seed-oil-8-g17	3720749	c10
SeedAla1-g2	3846538	c3
Seed-protein3-g12	3846538	c3
SeedArg1-g3	3846538	c3
SeedArg1-g13	3846538	c3
SeedAsp1-g2	3846538	c3
SeedCys1-g2	3846538	c3
SeedGlu1-g2	3846538	c3
SeedHis1-g4	3846538	c3
SeedMet1-g2	3846538	c3
SeedPhe1-g2	3846538	c3
SeedPro1-g1	3846538	c3
SeedTrp1-g4	3846538	c3
SeedVal1-g2	3846538	c3
Seed-oil4-g9	3846538	c10
Seed-oil-8-g18	3846538	c10
Seed-linolenic-3-g3	3846538	c10
Seed-oil4-g10	3851525	c10						Glyma.15G049200	GmSWEET39	3874867	3876757
Seed-oil-10-g5	3913001	3913001	4932277	4932277	c10
Seed-oil4-g11	3936757	c10
Seed-protein3-g13	3936757	c3
Seed-protein3-g14	3937899	c3
Seed-oil4-g12	3937899	c10
Seed-oil4-g13	3985288	c10
Seed-protein3-g15	3985288	c3
SeedTrp1-g19	4006986	c3
Seed-oil-11-g5	4148354	4148354	5633343	5633343	c10
Glyma.15G055600	4350474	c6
Seed-protein6-g1	4685574	c3
SeedIle1-g1	4685574	c3
SeedLeu1-g2	4685574	c3
SeedLys1-g2	4685574	c3
SeedGlu1-g3	4778258	c3
Seed-Thr-1-g2	4783644	c3
Satt212	5240509
Glyma.15G073100	5604443	c2
cqSeedprotein-001	6823519	6823519	7537521	7537521	c3
Seed-oil-8-g19	6853445	c10
SeedArg1-g14	6853445	c3
Seed-protein7-g13	7705443	c3
Glyma.15G105100	8240990	c2
Seed-linoleic-4-g8	8729762	c10
Seed-linolenic-4-g7	8729762	c10
Seed-protein6-g2	10102255	c3
SeedArg1-g4	10102255	c3
Seed-protein-10-g13	10218629	10218629	10877491	10877491	c3
Seed-oleic-5-g2	10969418	10969418	25595471	25595471	c10
Seed-protein7-g14	11258939	c3
SeedLys1-g6	12150934	c3
Seed-palmitic-5-g6	13416716	c10
Seed-protein7-g15	16373355	c3
Seed-Leu-1-g3	16673056	c3
Satt706	17021739
Seed-palmitic-1-g6	24834013	24834013	24834152	24834152	c10
Satt263	28489658
Seed-oleic-1-g13	28489658	28489658	28489879	28489879	c10
Seed-linoleic-1-g10	28489658	28489658	28489879	28489879	c10
Satt716	34078387
Satt483	37490512
Satt724	43169919
SeedTrp1-g20	43631120	c3
Seed-stearic-4-g3	43974081	c10
Satt685	49067066
SeedTrp1-g21	49442375	c3
Seed-protein7-g24	49617177	c3
Seed-palmitic-5-g7	49657528	c10
Sat_381	51080930
End	51756343
Group	GM16
Start	0
Seed-oleic-2-g3	1258943	c10
Seed-oleic-2-g4	1260003	c10
Satt405	1293196
Satt285	2827903
Seed-palmitic-6-g4	3002525	3002525	4148354	4148354	c10
Glyma.16G038300	3617280	c7
Seed-protein4-g5	4204153
Seed-oil-5-g5	4204153	c10
Seed-protein-4-g5	4204153	c3
Seed-stearic-2-g3	6804502	c10
Seed-oil-8-g20	7101528	c10
SeedArg1-g5	7122876
SeedArg1-g15	7122876
Seed-Arg-1-g5	7122876	c3
Seed-Arg-1-g15	7122876	c3
Sat_370	7211873
Satt596	14155157
Seed-oleic-1-g25	14155157	14155157	14155412	14155412	c10
Seed-linoleic-1-g21	14155157	14155157	14155412	14155412	c10
Seed-linolenic-1-g12	14155157	14155157	14155412	14155412	c10
Satt280	21543608
Seed-protein7-g25	28851611
Seed-protein-7-g25	28851611	c3
Satt215	28944536
Satt244	33818897
Seed-protein6-g3	35721993
SeedArg1-g6	35721993
Seed-protein-6-g3	35721993	c3
Seed-Arg-1-g6	35721993	c3
Seed-oil-8-g21	35760955	c10
Seed-oil-to-protein-ratio-2-g1	37086672	37086672	37125034	37125034	c10
Seed-palmitic-1-g14	37330986	37330986	37331159	37331159	c10
Seed-oleic-1-g23	37330986	37330986	37331159	37331159	c10
Seed-linoleic-1-g19	37330986	37330986	37331159	37331159	c10
Seed-linolenic-1-g10	37330986	37330986	37331159	37331159	c10
Sat_393	37631694
End	37887014
Seed-protein-8-g1	40916521	40916521	40974254	40974254	c3
Group	GM17
Start	0
Glyma.17G026200	1928562	c8
Sat_192	2833622
Satt328	3860437
Glyma.17G067200	5203358	c7
SeedAsp1-g8	5761052	c3
SeedLys1-g7	5761052	c3
Satt135	5891979
Seed-protein7-g26	7692667	c3
Seedoleic1-g10	8817810	8817810	8817935	8817935	c10
Seedlinoleic1-g8	8817810	8817810	8817935	8817935	c10
Seedlinolenic1-g5	8817810	8817810	8817935	8817935	c10
Seed-oil8-g22	8842317	c10
SeedArg2-g2	8920937	c3
SeedAsp2-g6	8920937	c3
SeedGlu2-g4	9075599	c3
SeedIle2-g6	9075599	c3
SeedTyr2-g3	9075599	c3
Glyma.17G116500	9199427	c7
SeedArg2-g1	11792205	c3
Sat_292	12509368
SeedAla2-g1	12580848	c3
SeedAsp2-g1	12580848	c3
SeedGlu2-g1	12580848	c3
SeedGly2-g1	12580848	c3
SeedIle2-g1	12580848	c3
SeedLys2-g1	12580848	c3
SeedMet2-g1	12580848	c3
SeedPhe2-g1	12580848	c3
SeedVal2-g1	12580848	c3
SeedLeu2-g1	12580848	c3
SeedTyr2-g1	12864946	c3
Sat_222	12887597
Seedoleic1-g12	13771477	13771477	13771699	13771699	c10
Glyma.17G160300	13905715	c7
Satt311	18065453
Satt488	27359151
Seedlinolenic7-g1	36411792	c10
Satt301	36718722
Seed-oil2-g3	37515902	c10
Seed-oil3-g6	38763354	38763354	38763579	38763579	c10
Satt310	38772790
Seed-protein9-g5	38930849	38930849	40629216	40629216	c3
Glyma.17G238200	39357077	c2
Satt672	39843976
Seedpalmitic1-g5	40470356	40470356	40470549	40470549	c10
Seedoleic1-g11	40470356	40470356	40470549	40470549	c10
Seedlinoleic1-g9	40470356	40470356	40470549	40470549	c10
Seedlinolenic1-g6	40470356	40470356	40470549	40470549	c10
Sat_220	41067120
End	41641366
Group	GM18
Start	0
Satt038	1344090
Seed oleic 1-g17	1344090	1344090	1344260	1344260	c10
Seed linoleic 1-g14	1344090	1344090	1344260	1344260	c10
Glyma.18G021000	1536200	c8
Seed oil 3-g2	3626442	3626442	3626636	3626636	c10
Seed linolenic 4-g8	4615907	c10
Satt130	4639971
Seed oil 3-g7	4639971	4639971	4640389	4640389	c10
Glyma.18G061100	5539339	c2
Seed oil 8-g23	5543903	c10
Seed Arg 1-g16	5543903	c3
Seed Trp 1-g22	5543903	c3
Seed Asp 1-g9	5597675	c3
Seed palmitic 1-g10	5927346	5927346	5927581	5927581	c10
Sat_403	6207617
Seed protein 7-g27	6771341	c3
Sat_358	11645228
Glyma.18G116900	14361159	c8
Satt340	15179498
Seed protein 7-g28	16827775	c3
Seed Tyr 1-g2	18333296	c3
Seed oil 8-g24	18452921	c10
Seed palmitic 1-g9	21906039	21906039	21906282	21906282	c10
Seed oleic 1-g18	21906039	21906039	21906282	21906282	c10
Seed linoleic 1-g15	21906039	21906039	21906282	21906282	c10
Satt594	22375695
Satt427	30071688
Seed linolenic 4-g10	37282110	c10
Satt533	42149108
Seed protein 5-g2	45438677	c3
Satt400	46109167
Seed oil 8-g25	48627264	c10
Seed linolenic 4-g11	49259101	c10
Seed oleic 4-g5	50135327	c10
Seed stearic 4-g4	50135327	c10
Satt288	51127425
Seed protein 7-g29	51917975	c3
Seed protein 10-g14	52660341	52660341	53019901	53019901	c3
Glyma.18G261800	54766457	c6
Seed stearic 4-g5	55524468	c10
Seed linolenic 4-g12	56019889	c10
Sat_064	56333703
End	58018742
Group	GM19
Start	0
Satt232	1636094
Seed-oil-3-g10	2059590	2059590	2059807	2059807	c10
Seed-palmitic-1-g18	2059590	2059590	2059807	2059807	c10
Seed-oleic-1-g28	2059590	2059590	2059807	2059807	c10
Seed-protein-9-g6	2437848	2437848	8172484	8172484	c3
SeedAsp1-g10	5149450	c3
SeedTrp1-g23	5251007	c3
Glyma.19G042900	6251912	c7
Glyma.19G043000	6272211	c7
Seed-oil-10-g6	7431552	7431552	50732077	50732077	c10
Satt278	8964065
Seed-oleic-2-g5	12874336	c10
Sat_134	14048834
Satt711	31391445
Satt613	35280772
Seed-oleic-3-g4	36428857	c10
Glyma.19G111000	36534479	c7
SeedGly1-g5	37867733	c3
Glyma.19G159300	42009060	c4
Glyma.19G159300	42009060	c7
Seed-palmitic-1-g20	42119600	42119600	42119863	42119863	c10
Seed-oleic-1-g29	42119600	42119600	42119863	42119863	c10
Seed-linoleic-1-g23	42119600	42119600	42119863	42119863	c10
Satt166	42616473
Seedaminoacids1-g25.1	44806855	c3
Seedaminoacids1-g25.2	44912660	c3
Seedaminoacids1-g25.3	44922846	c3
Sat_286	45182458
Satt229	47167396
Seed-palmitic-1-g19	47167396	47167396	47167618	47167618	c10
Seed-protein7-g16	47737768	c3
Satt373	49312675
Seed-oil-3-g11	49312675	49312675	49312922	49312922	c10
Sat_245	50144770
Seed-oil-5-g6	50539611	c10
Seed-protein4-g6	50539611	c3
Seed-oil-2-g6	50707176	c10
End	50746916
Group	GM20
Start	0
Seed-oil-6-g4	601752	c10
BARC-055857-13795	677320
Satt571	1287393
Seed-oil-3-g9	1287393	1287393	1287548	1287548	c10
Seed-palmitic-1-g13	1287393	1287393	1287548	1287548	c10
Seed-oleic-1-g22	1287393	1287393	1287548	1287548	c10
Seed-linoleic-1-g18	1287393	1287393	1287548	1287548	c10
Seed-linolenic-1-g9	1287393	1287393	1287548	1287548	c10
Seed-palmitic-1-g12	1882497	1882497	1882695	1882695	c10
Seed-oleic-1-g21	1882497	1882497	1882695	1882695	c10
Satt419	1885268
Satt587	3725849
Satt614	3903416
Seed-protein7-g30	4036946	c3
Seed-protein-9-g7	4838960	4838960	34233254	34233254	c3
Seed-oil-10-g7	4838960	4838960	34266254	34266254	c10
cqSeedprotein-003/Seedprotein31-1	8169525	8169525	33590931	33590931	c3
Satt127	8169252
Seed-protein7-g2	13096149	c3
Seed-oil-5-g7	18345755	c10
Seed-protein4-g7	18345755	c3
Seed-protein3-g3	21083301	c3
Seed-oil-4-g1	21083301	c10
BARC-029827-06444	24177090
SeedHis1-g5	25163148	c3
Seed-oil-3-g8	25275083	25275083	25275269	25275269	c10
Satt700	25498552
Satt496	27664504
Seed-oil-11-g6	29708844	29708844	33776941	33776941	c10
Seed-protein3-g1	30743655	c3
Seed-protein3-g2	31127936	c3
Seed-protein4-g8	31756869	c3
Seed-oil-5-g8	31866045	c10
Seed-protein3-g4	32281310	c3
Seed-oil-4-g2	32281310	c10
Seed-oil-6-g3	32296452	c10
Seed-protein3-g5	32382722	c3
Seed-oil-4-g3	32382722	c10
Seed-oil-11-g7	32474481	32474481	33776941	33776941	c10
Seed-protein3-g6	32575639	c3
Seed-protein3-g7	32720642	c3
Seed-oil-4-g4	32720642	c10
Seed-protein3-g8	32750902	c3
Seed-oil-4-g5	32750902	c10
Seed-protein3-g9	32780487	c3
Seed-oil-4-g6	32780487	c10
Seed-protein3-g10	32833826	c3
Seed-oil-4-g7	32833826	c10
Seed-protein3-g11	33119884	c3
Seed-oil-4-g8	33119884	c10
BARC-027790-06672	34073880
Satt270	35362576
Seed-palmitic-1-g11	35362576	35362576	35362794	35362794	c10
Seed-oleic-1-g19	35362576	35362576	35362794	35362794	c10
Seed-linoleic-1-g16	35362576	35362576	35362794	35362794	c10
Seed-linolenic-1-g8	35362576	35362576	35362794	35362794	c10
Glyma.20G121400	36402262	c7
Seed-oil-7-g2	36704632	c10
Seed-oil-7-g3	36708907	c10
Satt049	36842373
Sat_104	37789703
Satt650	38172219
Seedaminoacids1-g17	38215861	c3
Seed-oleic-1-g20	40623814	40623814	40624043	40624043	c10
Seed-linoleic-1-g17	40623814	40623814	40624043	40624043	c10
Glyma.20G177800	41524383	c7
Satt623	42165892
Seed-oil-to-protein-ratio-2-g2	42193329	42193329	45389200	45389200	c10
Satt148	43382152
Sat_299	43634534
SeedAsp2-g7	46242048	c3
SeedVal2-g5	46242048	c3
Satt440	46787225
End	47904181
