# Supplementary material for: Differential gene expression provides leads to environmentally regulated soybean seed protein content
Source: Front Plant Sci. 2023 Sep 18;14:1260393. doi: 10.3389/fpls.2023.1260393 (PMC10544915; doi:10.3389/fpls.2023.1260393)
Supplement: Supplementary Table 1 — Top-down analysis of up- and downregulated genes in each line-location analysis, and cumulatively DE genes. Supplementary Table 2 : Bottom-up analysis summarizing asparagine, alanine, aspartate, glutamate, and oxaloacetate DE data. Supplementary Table 3 : KEGG pathway mapping information for top-down and bottom-up analyses. Supplementary Table 4 : MapChart chromosome map data for G. max chromosomes 1–20. Supplementary Figure 1 : High resolution image of top-down analysis KEGG pathway map (gmx01100). Supplementary Figure 2 : Amino acid sequence alignment of AS-related proteins. [file Table_1.xlsx]

## Sheet: Brandon_up
Supplementary Table 1: Top-down analysis of up- and downregulated genes in each line-location. Individual line-location DE genes are listed (1-10) with their location identifiers: Brandon (B), Morden (M), Saskatoon (S). All unique gene IDs are listed as well as the commonly up/down-regulated genes within each location. Commonly DE genes across all 10 lines from each location were used for crossco…
B.01	B.02	B.03	B.04	B.05	B.06	B.07	B.08	B.09	B.10		Unique IDs 1-10		Commonly UP in all BRANDON 1-10	774 UP in all B 1-10
GLYMA_18G146400	GLYMA_03G103100	GLYMA_14G220900	GLYMA_17G227600	GLYMA_14G220900	GLYMA_14G120400	GLYMA_11G225500	GLYMA_05G102700	GLYMA_17G224900	GLYMA_03G103100		GLYMA_18G146400		GLYMA_17G031600
GLYMA_06G184400	GLYMA_17G224900	GLYMA_02G166900	GLYMA_14G064600	GLYMA_15G222200	GLYMA_01G055700	GLYMA_19G085200	GLYMA_17G203400	GLYMA_14G099900	GLYMA_18G146400		GLYMA_06G184400		GLYMA_14G018900
GLYMA_19G027000	GLYMA_04G180400	GLYMA_17G203400	GLYMA_18G094300	GLYMA_02G166900	GLYMA_17G203400	GLYMA_14G220900	GLYMA_03G170900	GLYMA_03G044900	GLYMA_04G180300		GLYMA_19G027000		GLYMA_13G043000
GLYMA_11G255800	GLYMA_11G022100	GLYMA_05G102700	GLYMA_14G220600	GLYMA_11G153400	GLYMA_15G213700	GLYMA_01G055700	GLYMA_13G043000	GLYMA_17G203400	GLYMA_09G184300		GLYMA_11G255800		GLYMA_03G216900
GLYMA_14G175700	GLYMA_09G188800	GLYMA_07G242600	GLYMA_19G014500	GLYMA_17G031600	GLYMA_10G092400	GLYMA_17G203400	GLYMA_17G031600	GLYMA_10G285300	GLYMA_06G184400		GLYMA_14G175700		GLYMA_19G003400
GLYMA_10G092400	GLYMA_19G250400	GLYMA_14G018900	GLYMA_19G250400	GLYMA_03G170900	GLYMA_13G043000	GLYMA_14G175700	GLYMA_07G242600	GLYMA_17G031600	GLYMA_17G261900		GLYMA_10G092400		GLYMA_02G250700
GLYMA_05G102700	GLYMA_14G064500	GLYMA_03G216900	GLYMA_01G221600	GLYMA_07G242600	GLYMA_03G216900	GLYMA_19G027000	GLYMA_08G070900	GLYMA_07G242600	GLYMA_07G162700		GLYMA_05G102700		GLYMA_19G219800
GLYMA_12G158300	GLYMA_18G274200	GLYMA_03G101800	GLYMA_07G088000	GLYMA_20G062700	GLYMA_02G250700	GLYMA_17G031600	GLYMA_20G062700	GLYMA_03G216900	GLYMA_07G156900		GLYMA_12G158300		GLYMA_20G062700
GLYMA_07G242600	GLYMA_03G170900	GLYMA_20G062700	GLYMA_15G002300	GLYMA_13G043000	GLYMA_18G012300	GLYMA_07G242600	GLYMA_14G018900	GLYMA_19G003400	GLYMA_17G171400		GLYMA_07G242600		GLYMA_15G150200
GLYMA_17G031600	GLYMA_19G168700	GLYMA_17G031600	GLYMA_11G022100	GLYMA_17G141700	GLYMA_19G003400	GLYMA_20G062700	GLYMA_09G038900	GLYMA_05G003000	GLYMA_15G222200		GLYMA_17G031600		GLYMA_08G070900
GLYMA_14G018900	GLYMA_14G064600	GLYMA_19G171800	GLYMA_15G150200	GLYMA_03G216900	GLYMA_03G261800	GLYMA_03G170900	GLYMA_18G106400	GLYMA_10G054200	GLYMA_10G285300		GLYMA_14G018900		GLYMA_03G261800
GLYMA_13G043000	GLYMA_18G030700	GLYMA_05G055200	GLYMA_11G162500	GLYMA_18G106400	GLYMA_19G219800	GLYMA_19G171800	GLYMA_09G188800	GLYMA_03G261800	GLYMA_11G255800		GLYMA_13G043000		GLYMA_11G223000
GLYMA_03G216900	GLYMA_19G213500	GLYMA_03G170900	GLYMA_09G188800	GLYMA_01G209500	GLYMA_17G031600	GLYMA_05G055200	GLYMA_17G141700	GLYMA_19G213500	GLYMA_03G053500		GLYMA_03G216900		GLYMA_18G034600
GLYMA_19G003400	GLYMA_02G259800	GLYMA_17G141700	GLYMA_08G251500	GLYMA_08G309700	GLYMA_20G163500	GLYMA_03G101800	GLYMA_06G160300	GLYMA_02G250700	GLYMA_04G180400		GLYMA_19G003400		GLYMA_04G100200
GLYMA_02G250700	GLYMA_20G062700	GLYMA_13G043000	GLYMA_02G259800	GLYMA_14G064500	GLYMA_02G292100	GLYMA_13G043000	GLYMA_10G226200	GLYMA_08G003500	GLYMA_15G246100		GLYMA_02G250700		GLYMA_14G031100
GLYMA_19G219800	GLYMA_20G163500	GLYMA_09G202000	GLYMA_17G054500	GLYMA_03G101800	GLYMA_07G242600	GLYMA_19G003400	GLYMA_05G027000	GLYMA_05G055200	GLYMA_03G216900		GLYMA_19G219800		GLYMA_01G129700
GLYMA_20G062700	GLYMA_01G209500	GLYMA_11G032700	GLYMA_14G064500	GLYMA_05G160700	GLYMA_11G162500	GLYMA_04G109900	GLYMA_19G171800	GLYMA_05G195900	GLYMA_10G004800		GLYMA_20G062700		GLYMA_12G181000
GLYMA_15G150200	GLYMA_13G043000	GLYMA_18G251000	GLYMA_05G027000	GLYMA_14G018900	GLYMA_08G003500	GLYMA_09G188800	GLYMA_13G038600	GLYMA_13G141200	GLYMA_13G084000		GLYMA_15G150200		GLYMA_05G195900
GLYMA_12G187100	GLYMA_03G252800	GLYMA_19G003400	GLYMA_07G126600	GLYMA_03G104800	GLYMA_14G018900	GLYMA_10G226200	GLYMA_04G079100	GLYMA_17G066100	GLYMA_12G196200		GLYMA_12G187100		GLYMA_08G003500
GLYMA_08G070900	GLYMA_07G088000	GLYMA_05G003000	GLYMA_08G132700	GLYMA_10G054200	GLYMA_02G181600	GLYMA_03G216900	GLYMA_15G258600	GLYMA_20G045800	GLYMA_19G219800		GLYMA_08G070900		GLYMA_13G141200
GLYMA_02G239300	GLYMA_06G179200	GLYMA_01G209500	GLYMA_06G291700	GLYMA_07G220300	GLYMA_03G001600	GLYMA_07G258800	GLYMA_13G365900	GLYMA_14G173600	GLYMA_15G058000		GLYMA_02G239300		GLYMA_05G013700
GLYMA_03G261800	GLYMA_08G251500	GLYMA_05G226000	GLYMA_13G358600	GLYMA_09G188800	GLYMA_08G035900	GLYMA_05G003000	GLYMA_08G035900	GLYMA_05G160700	GLYMA_07G126900		GLYMA_03G261800		GLYMA_15G005700
GLYMA_11G223000	GLYMA_01G221600	GLYMA_16G201700	GLYMA_12G179700	GLYMA_15G258600	GLYMA_11G223000	GLYMA_05G195900	GLYMA_03G101800	GLYMA_15G150200	GLYMA_10G168200		GLYMA_11G223000		GLYMA_08G035900
GLYMA_14G134900	GLYMA_08G053700	GLYMA_04G109900	GLYMA_03G217700	GLYMA_05G055200	GLYMA_05G195900	GLYMA_02G250700	GLYMA_06G022900	GLYMA_13G043000	GLYMA_18G251100		GLYMA_14G134900		GLYMA_03G170900
GLYMA_18G034600	GLYMA_15G150200	GLYMA_10G054200	GLYMA_14G018900	GLYMA_08G070900	GLYMA_09G228000	GLYMA_07G126900	GLYMA_17G230000	GLYMA_18G238100	GLYMA_02G250700		GLYMA_18G034600		GLYMA_17G066100
GLYMA_04G100200	GLYMA_12G202700	GLYMA_17G066100	GLYMA_07G133700	GLYMA_01G221600	GLYMA_05G160700	GLYMA_08G035900	GLYMA_05G003000	GLYMA_20G062700	GLYMA_20G062700		GLYMA_04G100200		GLYMA_01G124500
GLYMA_09G022500	GLYMA_07G133700	GLYMA_17G139500	GLYMA_18G123100	GLYMA_09G038900	GLYMA_07G126600	GLYMA_09G038900	GLYMA_05G055200	GLYMA_11G223000	GLYMA_03G261800		GLYMA_09G022500		GLYMA_18G285100
GLYMA_07G250600	GLYMA_03G217700	GLYMA_11G234800	GLYMA_02G010600	GLYMA_05G027000	GLYMA_07G220300	GLYMA_13G040100	GLYMA_19G033800	GLYMA_18G034600	GLYMA_19G003400		GLYMA_07G250600		GLYMA_09G188800
GLYMA_16G201700	GLYMA_14G009000	GLYMA_02G250700	GLYMA_03G216900	GLYMA_15G144000	GLYMA_10G054200	GLYMA_04G104700	GLYMA_14G064500	GLYMA_09G202000	GLYMA_14G134900		GLYMA_16G201700		GLYMA_07G125100
GLYMA_14G100000	GLYMA_18G106400	GLYMA_03G001600	GLYMA_18G012300	GLYMA_16G201700	GLYMA_12G196200	GLYMA_17G141700	GLYMA_07G258800	GLYMA_14G031100	GLYMA_18G251000		GLYMA_14G100000		GLYMA_07G126900
GLYMA_11G234800	GLYMA_15G002300	GLYMA_08G070900	GLYMA_06G093600	GLYMA_07G258800	GLYMA_05G003000	GLYMA_10G241700	GLYMA_09G202000	GLYMA_07G126900	GLYMA_05G003000		GLYMA_11G234800		GLYMA_18G225000
GLYMA_17G011800	GLYMA_18G236700	GLYMA_17G054500	GLYMA_08G180500	GLYMA_09G278000	GLYMA_12G105700	GLYMA_14G064500	GLYMA_20G163500	GLYMA_11G032700	GLYMA_01G036900		GLYMA_17G011800		GLYMA_12G196200
GLYMA_02G156000	GLYMA_03G216900	GLYMA_13G306200	GLYMA_03G261800	GLYMA_19G003400	GLYMA_18G225000	GLYMA_16G201700	GLYMA_19G219800	GLYMA_08G314700	GLYMA_18G034600		GLYMA_02G156000		GLYMA_13G062500
GLYMA_14G031100	GLYMA_06G093600	GLYMA_09G038900	GLYMA_08G175300	GLYMA_15G032500	GLYMA_19G114600	GLYMA_02G239300	GLYMA_03G035600	GLYMA_03G170900	GLYMA_11G223000		GLYMA_14G031100		GLYMA_14G173600
GLYMA_07G205200	GLYMA_02G010600	GLYMA_05G160700	GLYMA_15G239600	GLYMA_07G125100	GLYMA_04G100200	GLYMA_11G032700	GLYMA_18G030700	GLYMA_12G197300	GLYMA_16G138500		GLYMA_07G205200		GLYMA_17G141700
GLYMA_11G025000	GLYMA_08G319200	GLYMA_03G104800	GLYMA_20G045800	GLYMA_05G003000	GLYMA_20G045800	GLYMA_03G261800	GLYMA_19G003400	GLYMA_18G225000	GLYMA_01G091300		GLYMA_11G025000		GLYMA_14G066000
GLYMA_14G099900	GLYMA_14G018900	GLYMA_01G221600	GLYMA_04G128500	GLYMA_19G171800	GLYMA_08G070900	GLYMA_18G106400	GLYMA_05G160700	GLYMA_14G134900	GLYMA_17G031600		GLYMA_14G099900		GLYMA_01G036900
GLYMA_01G129700	GLYMA_14G197500	GLYMA_20G232700	GLYMA_17G212200	GLYMA_01G129700	GLYMA_14G031100	GLYMA_05G013700	GLYMA_13G141200	GLYMA_12G196200	GLYMA_05G195900		GLYMA_01G129700		GLYMA_13G331600
GLYMA_18G251100	GLYMA_03G261800	GLYMA_14G031100	GLYMA_01G036900	GLYMA_06G160300	GLYMA_10G241700	GLYMA_15G239300	GLYMA_11G022100	GLYMA_02G239300	GLYMA_16G201700		GLYMA_18G251100		GLYMA_11G208600
GLYMA_10G054200	GLYMA_02G181600	GLYMA_03G261800	GLYMA_04G255600	GLYMA_07G133700	GLYMA_13G279800	GLYMA_08G070900	GLYMA_01G209500	GLYMA_18G251100	GLYMA_16G190600		GLYMA_10G054200		GLYMA_07G126600
GLYMA_09G043400	GLYMA_09G278000	GLYMA_12G196200	GLYMA_04G003200	GLYMA_13G038600	GLYMA_17G054500	GLYMA_13G141200	GLYMA_03G040100	GLYMA_10G048500	GLYMA_12G105700		GLYMA_09G043400		GLYMA_08G335000
GLYMA_12G181000	GLYMA_05G027000	GLYMA_08G270000	GLYMA_18G236700	GLYMA_18G251100	GLYMA_18G034600	GLYMA_08G270000	GLYMA_14G031100	GLYMA_06G154500	GLYMA_18G026900		GLYMA_12G181000		GLYMA_04G137600
GLYMA_08G068700	GLYMA_08G035900	GLYMA_18G106400	GLYMA_02G250700	GLYMA_13G365900	GLYMA_15G258600	GLYMA_19G240800	GLYMA_10G241700	GLYMA_19G171800	GLYMA_13G086700		GLYMA_08G068700		GLYMA_08G033100
GLYMA_05G195900	GLYMA_03G101800	GLYMA_17G168100	GLYMA_05G191000	GLYMA_04G109900	GLYMA_09G188800	GLYMA_18G267900	GLYMA_15G144000	GLYMA_10G241700	GLYMA_06G278900		GLYMA_05G195900		GLYMA_07G086700
GLYMA_02G222000	GLYMA_07G242600	GLYMA_12G195600	GLYMA_14G047500	GLYMA_15G150200	GLYMA_13G206700	GLYMA_15G150200	GLYMA_08G309700	GLYMA_04G100200	GLYMA_07G242600		GLYMA_02G222000		GLYMA_13G136300
GLYMA_18G301200	GLYMA_13G089800	GLYMA_08G003500	GLYMA_18G269700	GLYMA_20G163500	GLYMA_10G048500	GLYMA_15G024200	GLYMA_18G251100	GLYMA_08G188600	GLYMA_08G270000		GLYMA_18G301200		GLYMA_11G074900
GLYMA_08G003500	GLYMA_06G022900	GLYMA_18G034600	GLYMA_11G244900	GLYMA_08G168400	GLYMA_14G066000	GLYMA_12G149500	GLYMA_02G265900	GLYMA_13G136300	GLYMA_04G013400		GLYMA_08G003500		GLYMA_10G048500
GLYMA_13G141200	GLYMA_03G008100	GLYMA_08G035900	GLYMA_04G132200	GLYMA_14G029800	GLYMA_08G314700	GLYMA_01G100000	GLYMA_07G220300	GLYMA_01G036900	GLYMA_04G042400		GLYMA_13G141200		GLYMA_02G063400
GLYMA_17G224900	GLYMA_17G141700	GLYMA_02G239300	GLYMA_03G131700	GLYMA_15G042500	GLYMA_07G126900	GLYMA_17G066100	GLYMA_10G054200	GLYMA_14G066000	GLYMA_17G141700		GLYMA_17G224900		GLYMA_06G061200
GLYMA_05G013700	GLYMA_07G126900	GLYMA_11G223000	GLYMA_13G288000	GLYMA_08G270000	GLYMA_04G128500	GLYMA_17G224900	GLYMA_07G126600	GLYMA_19G219800	GLYMA_03G001600		GLYMA_05G013700		GLYMA_19G260900
GLYMA_18G199300	GLYMA_17G031600	GLYMA_09G188800	GLYMA_13G098000	GLYMA_19G147700	GLYMA_01G221600	GLYMA_15G005700	GLYMA_03G216100	GLYMA_18G251000	GLYMA_13G287600		GLYMA_18G199300		GLYMA_12G105700
GLYMA_04G042100	GLYMA_09G038900	GLYMA_12G011500	GLYMA_14G018800	GLYMA_13G130600	GLYMA_02G265900	GLYMA_06G160300	GLYMA_08G270000	GLYMA_06G037900	GLYMA_15G239300		GLYMA_04G042100		GLYMA_11G158200
GLYMA_07G192300	GLYMA_08G033000	GLYMA_04G100200	GLYMA_09G046200	GLYMA_02G181600	GLYMA_13G350400	GLYMA_14G087800	GLYMA_12G181000	GLYMA_13G079300	GLYMA_08G364100		GLYMA_07G192300		GLYMA_20G196200
GLYMA_11G164800	GLYMA_04G255600	GLYMA_18G251100	GLYMA_08G335000	GLYMA_03G144700	GLYMA_12G181000	GLYMA_14G100000	GLYMA_01G221600	GLYMA_13G288000	GLYMA_15G222100		GLYMA_11G164800		GLYMA_03G132700
GLYMA_15G005700	GLYMA_13G208300	GLYMA_05G195900	GLYMA_13G160400	GLYMA_10G200800	GLYMA_18G251000	GLYMA_18G251000	GLYMA_11G032700	GLYMA_08G070900	GLYMA_16G202200		GLYMA_15G005700		GLYMA_16G179100
GLYMA_11G133300	GLYMA_15G228900	GLYMA_19G212700	GLYMA_13G287600	GLYMA_06G026600	GLYMA_14G173600	GLYMA_15G144000	GLYMA_02G259800	GLYMA_14G100000	GLYMA_07G220300		GLYMA_11G133300		GLYMA_05G003000
GLYMA_08G035900	GLYMA_15G258600	GLYMA_01G230000	GLYMA_18G267900	GLYMA_19G168700	GLYMA_08G335000	GLYMA_19G142000	GLYMA_11G208600	GLYMA_14G067400	GLYMA_07G157000		GLYMA_08G035900		GLYMA_01G022300
GLYMA_15G012600	GLYMA_08G353500	GLYMA_11G056600	GLYMA_02G292100	GLYMA_04G079100	GLYMA_19G213500	GLYMA_08G011700	GLYMA_01G100000	GLYMA_02G265900	GLYMA_17G139500		GLYMA_15G012600		GLYMA_13G350300
GLYMA_12G007100	GLYMA_09G228000	GLYMA_06G058700	GLYMA_19G144500	GLYMA_09G228000	GLYMA_06G296300	GLYMA_06G113300	GLYMA_16G201700	GLYMA_17G139500	GLYMA_13G043000		GLYMA_12G007100		GLYMA_05G160700
GLYMA_03G170900	GLYMA_11G162500	GLYMA_07G258800	GLYMA_07G126900	GLYMA_13G208300	GLYMA_15G150200	GLYMA_12G196200	GLYMA_02G028000	GLYMA_20G163500	GLYMA_04G132200		GLYMA_03G170900		GLYMA_12G195600
ENSRNA050002778	GLYMA_18G094300	GLYMA_06G052800	GLYMA_20G163500	GLYMA_17G139500	GLYMA_13G089800	GLYMA_17G139500	GLYMA_11G162500	GLYMA_08G270000	GLYMA_19G060900		ENSRNA050002778		GLYMA_05G055300
GLYMA_15G042500	GLYMA_05G195900	GLYMA_15G150200	GLYMA_13G331600	GLYMA_03G261800	GLYMA_13G136300	GLYMA_05G075000	GLYMA_02G250700	GLYMA_07G126600	GLYMA_03G068900		GLYMA_15G042500		GLYMA_17G230000
GLYMA_16G148600	GLYMA_08G335000	GLYMA_03G144700	GLYMA_02G080800	GLYMA_20G183800	GLYMA_08G221600	GLYMA_15G032500	GLYMA_07G125100	GLYMA_17G011800	GLYMA_08G003500		GLYMA_16G148600		GLYMA_05G226100
GLYMA_13G358600	GLYMA_13G255000	GLYMA_01G129700	GLYMA_14G009000	GLYMA_10G226200	GLYMA_05G226000	GLYMA_08G003500	GLYMA_01G230000	GLYMA_13G358600	GLYMA_06G278500		GLYMA_13G358600		GLYMA_20G196100
GLYMA_13G308000	GLYMA_08G168400	GLYMA_12G084000	GLYMA_15G011000	GLYMA_13G350300	GLYMA_08G042000	GLYMA_03G035600	GLYMA_15G024200	GLYMA_11G133300	GLYMA_09G202000		GLYMA_13G308000		GLYMA_09G061300
GLYMA_02G056000	GLYMA_04G079100	GLYMA_10G226200	GLYMA_01G209500	GLYMA_20G147200	GLYMA_13G306200	GLYMA_13G365900	GLYMA_18G251000	GLYMA_11G158200	GLYMA_14G067400		GLYMA_02G056000		GLYMA_07G201000
GLYMA_17G066100	GLYMA_04G133500	GLYMA_14G134900	GLYMA_03G163100	GLYMA_10G241700	GLYMA_01G116300	GLYMA_11G223000	GLYMA_03G261800	GLYMA_11G234800	GLYMA_03G157800		GLYMA_17G066100		GLYMA_14G067400
GLYMA_03G083700	GLYMA_02G250700	GLYMA_10G295300	GLYMA_11G044700	GLYMA_02G239300	GLYMA_17G141700	GLYMA_01G209500	GLYMA_13G040100	GLYMA_16G053000	GLYMA_13G306200		GLYMA_03G083700		GLYMA_12G011400
GLYMA_07G271800	GLYMA_03G221300	GLYMA_19G218300	GLYMA_02G093200	GLYMA_13G040100	GLYMA_01G230000	GLYMA_18G034600	GLYMA_12G195600	GLYMA_18G285100	GLYMA_11G032700		GLYMA_07G271800		GLYMA_18G106400
GLYMA_12G197300	GLYMA_17G230000	GLYMA_07G126900	GLYMA_19G046000	GLYMA_02G010600	GLYMA_06G093600	GLYMA_12G197300	GLYMA_04G230200	GLYMA_14G053900	GLYMA_04G100200		GLYMA_12G197300		GLYMA_05G140700
GLYMA_18G055800	GLYMA_05G003000	GLYMA_20G183800	GLYMA_20G135400	GLYMA_01G085200	GLYMA_16G179100	GLYMA_19G212700	GLYMA_16G206300	GLYMA_01G129700	GLYMA_18G225000		GLYMA_18G055800		GLYMA_04G133400
GLYMA_13G176500	GLYMA_08G070900	GLYMA_06G154500	GLYMA_04G091800	GLYMA_15G124000	GLYMA_15G128200	GLYMA_05G025600	GLYMA_07G101000	GLYMA_17G141700	GLYMA_18G143400		GLYMA_13G176500		GLYMA_08G336300
GLYMA_07G258800	GLYMA_11G208600	GLYMA_18G055800	GLYMA_15G136700	GLYMA_12G197300	GLYMA_07G125100	GLYMA_20G163500	GLYMA_12G149500	GLYMA_20G027900	GLYMA_12G197300		GLYMA_07G258800		GLYMA_03G104800
GLYMA_01G124500	GLYMA_02G228000	GLYMA_05G051400	GLYMA_18G106400	GLYMA_08G053700	GLYMA_14G029900	GLYMA_01G108200	GLYMA_10G200800	GLYMA_17G044700	GLYMA_13G358600		GLYMA_01G124500		GLYMA_12G084000
GLYMA_18G285100	GLYMA_07G126600	GLYMA_06G166500	GLYMA_14G165000	GLYMA_04G026700	GLYMA_15G090200	GLYMA_04G100200	GLYMA_20G196100	GLYMA_20G203100	GLYMA_08G085700		GLYMA_18G285100		GLYMA_14G018800
GLYMA_05G226000	GLYMA_05G226000	GLYMA_13G044500	GLYMA_16G179100	GLYMA_12G015300	GLYMA_01G036900	GLYMA_10G213000	GLYMA_14G051900	GLYMA_12G049200	GLYMA_14G031100		GLYMA_05G226000		GLYMA_09G234700
GLYMA_09G188800	GLYMA_04G003200	GLYMA_15G144000	GLYMA_14G066000	GLYMA_06G022900	GLYMA_12G234500	GLYMA_04G100600	GLYMA_14G053900	GLYMA_20G147700	GLYMA_09G033700		GLYMA_09G188800		GLYMA_05G007600
GLYMA_03G157800	GLYMA_17G238200	GLYMA_02G265900	GLYMA_19G250200	GLYMA_10G206900	GLYMA_05G094300	GLYMA_17G230000	GLYMA_03G001600	GLYMA_18G267900	GLYMA_03G067100		GLYMA_03G157800		GLYMA_12G234500
GLYMA_08G360400	GLYMA_14G068300	GLYMA_12G189000	GLYMA_10G230200	GLYMA_18G251000	GLYMA_18G106400	GLYMA_01G129700	GLYMA_14G087800	GLYMA_03G171900	GLYMA_12G007100		GLYMA_08G360400		GLYMA_06G022900
GLYMA_07G125100	GLYMA_13G206700	GLYMA_04G023000	GLYMA_08G221600	GLYMA_07G088000	GLYMA_11G056600	GLYMA_05G027000	GLYMA_13G130600	GLYMA_06G318200	GLYMA_11G234800		GLYMA_07G125100		GLYMA_20G163500
GLYMA_07G126900	GLYMA_13G038600	GLYMA_11G133300	GLYMA_13G089800	GLYMA_09G013800	GLYMA_04G133500	GLYMA_18G030700	GLYMA_15G211700	GLYMA_16G179100	GLYMA_09G150300		GLYMA_07G126900		GLYMA_13G191900
GLYMA_09G038900	GLYMA_06G160300	GLYMA_06G093600	GLYMA_03G252700	GLYMA_11G032700	GLYMA_18G238100	GLYMA_02G160800	GLYMA_05G195900	GLYMA_07G220300	GLYMA_04G133500		GLYMA_09G038900		GLYMA_13G304100
GLYMA_18G225000	GLYMA_15G144000	GLYMA_14G066000	GLYMA_12G196200	GLYMA_10G099800	GLYMA_13G358600	GLYMA_11G133300	GLYMA_09G013800	GLYMA_12G063400	GLYMA_12G015300		GLYMA_18G225000		GLYMA_13G306300
GLYMA_03G123900	GLYMA_06G324100	GLYMA_07G181300	GLYMA_01G129700	GLYMA_08G329600	GLYMA_11G030800	GLYMA_07G039000	GLYMA_19G218300	GLYMA_19G212700	GLYMA_U041300		GLYMA_03G123900		GLYMA_01G239800
GLYMA_19G171800	GLYMA_10G099800	GLYMA_12G121200	GLYMA_02G272100	GLYMA_13G304900	GLYMA_17G066100	GLYMA_11G234800	GLYMA_04G223000	GLYMA_13G143700	GLYMA_20G162900		GLYMA_19G171800		GLYMA_06G179200
GLYMA_12G196200	GLYMA_19G171900	GLYMA_06G125500	GLYMA_15G079500	GLYMA_11G022100	GLYMA_16G201700	GLYMA_18G285100	GLYMA_12G049200	GLYMA_13G306300	GLYMA_10G213000		GLYMA_12G196200		GLYMA_08G314700
GLYMA_13G062500	GLYMA_08G003500	GLYMA_20G163500	GLYMA_10G048500	GLYMA_15G002300	GLYMA_20G135400	GLYMA_09G202000	GLYMA_19G168700	GLYMA_16G201700	GLYMA_14G066000		GLYMA_13G062500		GLYMA_09G170500
GLYMA_05G045600	GLYMA_14G110500	GLYMA_07G271800	GLYMA_13G206700	GLYMA_07G126600	GLYMA_15G211700	GLYMA_03G207800	GLYMA_02G181600	GLYMA_18G106400	GLYMA_12G195600		GLYMA_05G045600		GLYMA_03G139500
GLYMA_U044100	GLYMA_07G220300	GLYMA_01G124500	GLYMA_12G202700	GLYMA_13G089800	GLYMA_11G022100	GLYMA_03G218800	GLYMA_13G089800	GLYMA_04G133400	GLYMA_01G011600		GLYMA_U044100		GLYMA_07G218900
GLYMA_14G173600	GLYMA_01G230000	GLYMA_17G253800	GLYMA_14G051900	GLYMA_19G120600	GLYMA_10G247500	GLYMA_10G132500	GLYMA_13G044500	GLYMA_12G132800	GLYMA_14G051800		GLYMA_14G173600		GLYMA_18G295700
GLYMA_08G191900	GLYMA_03G168200	GLYMA_13G130600	GLYMA_08G003500	GLYMA_18G071400	GLYMA_14G067400	GLYMA_13G208300	GLYMA_14G197500	GLYMA_19G174900	GLYMA_09G118900		GLYMA_08G191900		GLYMA_08G319200
GLYMA_03G171900	GLYMA_05G160700	GLYMA_18G125200	GLYMA_15G075300	GLYMA_09G150300	GLYMA_02G089900	GLYMA_04G133500	GLYMA_13G208300	GLYMA_19G260900	GLYMA_03G170900		GLYMA_03G171900		GLYMA_01G209500
GLYMA_17G141700	GLYMA_13G066600	GLYMA_14G034000	GLYMA_11G223000	GLYMA_02G250700	GLYMA_18G286700	GLYMA_04G079100	GLYMA_02G287400	GLYMA_12G084000	GLYMA_08G048300		GLYMA_17G141700		GLYMA_17G211900
GLYMA_13G150100	GLYMA_15G210500	GLYMA_12G197300	GLYMA_18G288800	GLYMA_17G066100	GLYMA_13G040100	GLYMA_06G125500	GLYMA_03G216900	GLYMA_16G188800	GLYMA_02G063400		GLYMA_13G150100		GLYMA_18G071400
GLYMA_11G180600	GLYMA_08G132700	GLYMA_15G058300	GLYMA_10G015500	GLYMA_11G234800	GLYMA_03G138900	GLYMA_02G265900	GLYMA_07G126900	GLYMA_09G033700	GLYMA_12G181000		GLYMA_11G180600		GLYMA_08G254600
GLYMA_14G066000	GLYMA_04G091800	GLYMA_11G012900	GLYMA_09G126500	GLYMA_13G114200	GLYMA_06G215200	GLYMA_19G168700	GLYMA_15G150200	GLYMA_01G020400	GLYMA_08G070900		GLYMA_14G066000		GLYMA_12G120200
GLYMA_03G129200	GLYMA_17G015400	GLYMA_03G171900	GLYMA_13G101200	GLYMA_15G024200	GLYMA_08G030100	GLYMA_05G226000	GLYMA_18G057200	GLYMA_03G162600	GLYMA_07G250600		GLYMA_03G129200		GLYMA_13G349300
GLYMA_09G033700	GLYMA_16G206300	GLYMA_17G252500	GLYMA_17G015400	GLYMA_03G132700	GLYMA_18G251100	GLYMA_10G048500	GLYMA_04G003200	GLYMA_10G029600	GLYMA_18G271300		GLYMA_09G033700		GLYMA_14G029800
GLYMA_05G125000	GLYMA_07G125100	GLYMA_14G064500	GLYMA_08G082800	GLYMA_19G240800	GLYMA_15G228900	GLYMA_14G018900	GLYMA_01G129700	GLYMA_04G048500	GLYMA_17G157400		GLYMA_05G125000		GLYMA_08G243100
GLYMA_14G106600	GLYMA_14G087800	GLYMA_06G237400	GLYMA_11G208600	GLYMA_04G238400	GLYMA_10G004800	GLYMA_19G147700	GLYMA_12G189000	GLYMA_17G211900	GLYMA_20G045800		GLYMA_14G106600		GLYMA_19G082000
GLYMA_01G036900	GLYMA_16G201700	GLYMA_13G283900	GLYMA_01G055700	GLYMA_05G072200	GLYMA_08G270000	GLYMA_14G134900	GLYMA_06G125500	GLYMA_18G055800	GLYMA_04G109900		GLYMA_01G036900		GLYMA_18G205800
GLYMA_15G138400	GLYMA_02G080800	GLYMA_19G120600	GLYMA_06G022900	GLYMA_19G033800	GLYMA_03G170900	GLYMA_06G014100	GLYMA_06G037900	GLYMA_10G247500	GLYMA_13G086600		GLYMA_15G138400		GLYMA_17G044700
GLYMA_20G162900	GLYMA_09G013800	GLYMA_10G206900	GLYMA_07G125100	GLYMA_17G229000	GLYMA_01G210500	GLYMA_16G192400	GLYMA_03G104800	GLYMA_19G120600	GLYMA_17G086500		GLYMA_20G162900		GLYMA_04G060600
GLYMA_16G192400	GLYMA_10G048500	GLYMA_01G178300	GLYMA_18G034600	GLYMA_06G125500	GLYMA_07G205200	GLYMA_17G252500	GLYMA_10G132500	GLYMA_05G202100	GLYMA_06G103300		GLYMA_16G192400		GLYMA_19G032100
GLYMA_13G331600	GLYMA_18G034600	GLYMA_08G011700	GLYMA_07G019800	GLYMA_13G141200	GLYMA_14G064500	GLYMA_12G181000	GLYMA_12G197300	GLYMA_12G226500	GLYMA_14G173600		GLYMA_13G331600		GLYMA_19G147700
GLYMA_19G212700	GLYMA_13G365900	GLYMA_05G027000	GLYMA_12G003100	GLYMA_15G239700	GLYMA_07G039000	GLYMA_08G053700	GLYMA_09G278000	GLYMA_17G253800	GLYMA_11G129500		GLYMA_19G212700		GLYMA_04G133500
GLYMA_11G208600	GLYMA_11G223000	GLYMA_15G042500	GLYMA_13G319100	GLYMA_19G218300	GLYMA_17G211900	GLYMA_06G179200	GLYMA_18G286700	GLYMA_11G074900	GLYMA_12G049200		GLYMA_11G208600		GLYMA_13G306600
GLYMA_19G198700	GLYMA_10G241700	GLYMA_17G044700	GLYMA_14G173600	GLYMA_09G028400	GLYMA_05G007600	GLYMA_04G246600	GLYMA_06G190100	GLYMA_09G010700	GLYMA_10G048500		GLYMA_19G198700		GLYMA_04G003200
GLYMA_07G126600	GLYMA_18G012300	GLYMA_20G196200	GLYMA_14G167700	GLYMA_08G024400	GLYMA_04G254500	GLYMA_17G252700	GLYMA_08G003500	GLYMA_03G187000	GLYMA_07G133900		GLYMA_07G126600		GLYMA_19G127200
GLYMA_11G129500	GLYMA_01G106900	GLYMA_04G246600	GLYMA_03G104800	GLYMA_05G226000	GLYMA_16G053000	GLYMA_02G107400	GLYMA_12G105700	GLYMA_03G116200	GLYMA_05G234500		GLYMA_11G129500		GLYMA_09G028400
GLYMA_04G100600	GLYMA_13G094100	GLYMA_01G085200	GLYMA_01G095500	GLYMA_05G160200	GLYMA_06G179200	GLYMA_13G319100	GLYMA_20G232700	GLYMA_11G037300	GLYMA_14G018900		GLYMA_04G100600		GLYMA_10G229800
GLYMA_11G012900	GLYMA_13G222000	GLYMA_07G086700	GLYMA_08G253400	GLYMA_08G035900	GLYMA_05G027000	GLYMA_19G033800	GLYMA_05G055400	GLYMA_02G285000	GLYMA_03G222700		GLYMA_11G012900		GLYMA_18G286700
GLYMA_08G335000	GLYMA_15G136700	GLYMA_13G208300	GLYMA_19G120600	GLYMA_19G142000	GLYMA_05G160200	GLYMA_11G022100	GLYMA_13G288000	GLYMA_17G236500	GLYMA_04G128500		GLYMA_08G335000		GLYMA_03G062800
GLYMA_04G137600	GLYMA_U044100	GLYMA_15G032500	GLYMA_19G207000	GLYMA_03G001600	GLYMA_11G164800	GLYMA_18G286700	GLYMA_09G184000	GLYMA_18G030700	GLYMA_01G046300		GLYMA_04G137600		GLYMA_17G238200
GLYMA_02G160800	GLYMA_06G052800	GLYMA_13G141200	GLYMA_06G324100	GLYMA_09G057500	GLYMA_04G079100	GLYMA_07G126600	GLYMA_15G239300	GLYMA_19G147700	GLYMA_13G306300		GLYMA_02G160800		GLYMA_07G009900
GLYMA_19G037600	GLYMA_20G135500	GLYMA_20G186200	GLYMA_01G106900	GLYMA_18G057200	GLYMA_18G199300	GLYMA_07G220300	GLYMA_18G034600	GLYMA_16G133000	GLYMA_18G141900		GLYMA_19G037600		GLYMA_08G109400
GLYMA_08G033100	GLYMA_19G003400	GLYMA_10G132500	GLYMA_08G017700	GLYMA_06G061200	GLYMA_17G238200	GLYMA_17G054500	GLYMA_07G205200	GLYMA_06G179200	GLYMA_02G196300		GLYMA_08G033100		GLYMA_09G256100
GLYMA_12G189000	GLYMA_16G188900	GLYMA_19G114600	GLYMA_12G181000	GLYMA_11G012900	GLYMA_11G074900	GLYMA_09G033700	GLYMA_13G306200	GLYMA_04G100600	GLYMA_18G298000		GLYMA_12G189000		GLYMA_17G223400
GLYMA_16G138600	GLYMA_09G042900	GLYMA_08G033100	GLYMA_18G281000	GLYMA_06G093600	GLYMA_04G133400	GLYMA_12G197900	GLYMA_08G188600	GLYMA_09G188800	GLYMA_08G198900		GLYMA_16G138600		GLYMA_07G141500
GLYMA_07G086700	GLYMA_16G192400	GLYMA_12G181000	GLYMA_17G238200	GLYMA_12G049200	GLYMA_01G124500	GLYMA_02G022100	GLYMA_15G210500	GLYMA_12G097800	GLYMA_17G259800		GLYMA_07G086700		GLYMA_08G221600
GLYMA_19G164900	GLYMA_19G120600	GLYMA_09G228000	GLYMA_02G063400	GLYMA_20G234100	GLYMA_13G095200	GLYMA_05G140700	GLYMA_15G114000	GLYMA_15G252700	GLYMA_08G068700		GLYMA_19G164900		GLYMA_18G030700
GLYMA_05G051400	GLYMA_01G095500	GLYMA_07G107200	GLYMA_04G100200	GLYMA_04G100200	GLYMA_08G132700	GLYMA_15G042500	GLYMA_11G223000	GLYMA_05G125000	GLYMA_08G244800		GLYMA_05G051400		GLYMA_16G181900
GLYMA_13G136300	GLYMA_11G037200	GLYMA_18G030700	ENSRNA050003071	GLYMA_13G066600	GLYMA_13G044500	GLYMA_18G271300	GLYMA_06G093600	GLYMA_09G013800	GLYMA_16G202100		GLYMA_13G136300		GLYMA_19G213500
GLYMA_11G074900	GLYMA_02G051300	GLYMA_17G230000	GLYMA_03G008100	GLYMA_11G164000	GLYMA_04G003200	GLYMA_03G170800	GLYMA_19G120600	GLYMA_06G125700	GLYMA_18G127700		GLYMA_11G074900		GLYMA_08G279600
GLYMA_02G242900	GLYMA_14G066000	GLYMA_14G007000	GLYMA_20G062700	GLYMA_01G229600	GLYMA_08G360300	GLYMA_04G042100	GLYMA_09G228000	GLYMA_09G111500	GLYMA_19G024700		GLYMA_02G242900		GLYMA_01G229600
GLYMA_09G177800	GLYMA_14G173600	GLYMA_07G126600	GLYMA_19G035400	GLYMA_10G247300	GLYMA_15G005700	GLYMA_13G306200	GLYMA_17G066100	GLYMA_11G216700	GLYMA_19G260900		GLYMA_09G177800		GLYMA_11G162500
GLYMA_18G117800	GLYMA_15G012600	GLYMA_03G201800	GLYMA_12G234500	GLYMA_19G212700	GLYMA_20G062700	GLYMA_16G179100	GLYMA_11G234800	GLYMA_09G012200	GLYMA_13G191900		GLYMA_18G117800		GLYMA_02G143200
GLYMA_17G048600	GLYMA_19G142000	GLYMA_16G179100	GLYMA_19G159300	GLYMA_20G232700	GLYMA_11G109200	GLYMA_12G195600	GLYMA_03G138900	GLYMA_11G232000	GLYMA_06G267300		GLYMA_17G048600		GLYMA_18G267900
ENSRNA050030408	GLYMA_03G216100	GLYMA_13G050700	GLYMA_01G196900	GLYMA_03G035600	GLYMA_11G158200	GLYMA_14G091000	GLYMA_09G150300	GLYMA_07G100800	GLYMA_19G011700		ENSRNA050030408		GLYMA_03G217700
GLYMA_12G004700	GLYMA_20G045800	GLYMA_11G162500	GLYMA_05G195900	GLYMA_03G218800	GLYMA_03G116200	GLYMA_13G288000	GLYMA_11G056600	GLYMA_03G104800	GLYMA_06G179200		GLYMA_12G004700		GLYMA_16G053000
GLYMA_20G196000	GLYMA_15G211700	GLYMA_14G067400	GLYMA_08G308000	GLYMA_01G033400	GLYMA_18G057200	GLYMA_14G052600	GLYMA_04G109900	GLYMA_14G067300	GLYMA_10G029600		GLYMA_20G196000		GLYMA_05G215500
GLYMA_13G143700	GLYMA_07G019800	GLYMA_07G220300	GLYMA_03G168200	GLYMA_20G094300	GLYMA_19G260900	GLYMA_15G210500	GLYMA_09G009700	GLYMA_08G240100	GLYMA_08G307300		GLYMA_13G143700		GLYMA_09G010700
GLYMA_06G142100	GLYMA_19G147200	GLYMA_07G141500	GLYMA_09G039800	GLYMA_10G195200	GLYMA_02G126100	GLYMA_19G219800	GLYMA_07G010000	GLYMA_10G122700	GLYMA_20G062000		GLYMA_06G142100		GLYMA_18G012300
GLYMA_10G048500	GLYMA_20G232700	GLYMA_17G241300	GLYMA_04G004800	GLYMA_17G064500	GLYMA_09G239100	GLYMA_14G066000	GLYMA_17G139500	GLYMA_03G163100	GLYMA_01G122300		GLYMA_10G048500		GLYMA_19G027400
GLYMA_20G183800	GLYMA_15G114700	GLYMA_09G033700	GLYMA_09G184000	GLYMA_07G141500	GLYMA_09G010700	GLYMA_12G132800	GLYMA_05G025600	GLYMA_02G218000	GLYMA_07G126600		GLYMA_20G183800		GLYMA_20G217600
GLYMA_08G188600	GLYMA_03G104800	GLYMA_15G024200	GLYMA_20G152600	GLYMA_08G335000	GLYMA_19G142000	GLYMA_11G056600	GLYMA_20G135400	GLYMA_05G007600	GLYMA_04G104700		GLYMA_08G188600		GLYMA_03G187000
GLYMA_18G289100	GLYMA_12G149500	GLYMA_03G069200	GLYMA_16G146800	GLYMA_10G132500	GLYMA_18G030700	GLYMA_16G166000	GLYMA_02G046200	GLYMA_04G128500	GLYMA_06G074100		GLYMA_18G289100		GLYMA_02G007400
GLYMA_17G236500	GLYMA_13G331600	GLYMA_13G049700	GLYMA_10G169100	GLYMA_04G225400	GLYMA_19G168700	GLYMA_09G278000	GLYMA_10G213000	GLYMA_07G258800	GLYMA_02G195900		GLYMA_17G236500		GLYMA_10G241700
GLYMA_10G230200	GLYMA_06G026600	GLYMA_14G018800	GLYMA_16G138500	GLYMA_12G035300	GLYMA_12G195600	GLYMA_06G240400	GLYMA_05G032800	GLYMA_09G132200	GLYMA_13G266900		GLYMA_10G230200		GLYMA_15G149600
GLYMA_08G168400	GLYMA_02G287400	GLYMA_15G012600	GLYMA_13G141200	GLYMA_02G022100	GLYMA_12G015300	GLYMA_06G324200	GLYMA_04G255500	GLYMA_03G211700	GLYMA_13G136300		GLYMA_08G168400		GLYMA_19G043000
GLYMA_02G063400	GLYMA_01G180400	GLYMA_12G093000	GLYMA_09G201900	GLYMA_05G049300	GLYMA_20G196200	GLYMA_10G099800	GLYMA_05G072200	GLYMA_14G018900	GLYMA_13G060600		GLYMA_02G063400		GLYMA_20G232700
GLYMA_13G044500	GLYMA_13G288000	GLYMA_15G121000	GLYMA_18G152400	GLYMA_04G246600	GLYMA_11G208600	GLYMA_07G088000	GLYMA_07G039000	GLYMA_05G226000	GLYMA_07G086700		GLYMA_13G044500		GLYMA_16G151200
GLYMA_11G032700	GLYMA_19G034900	GLYMA_06G160300	GLYMA_15G042500	GLYMA_14G055900	GLYMA_14G178600	GLYMA_04G010600	GLYMA_07G133700	GLYMA_05G160200	GLYMA_03G116200		GLYMA_11G032700		GLYMA_20G241800
GLYMA_10G076000	GLYMA_16G179100	GLYMA_15G258600	GLYMA_11G068700	GLYMA_14G220600	GLYMA_02G195900	GLYMA_05G160200	GLYMA_14G064600	GLYMA_12G105700	GLYMA_18G057200		GLYMA_10G076000		GLYMA_12G021800
GLYMA_01G061900	GLYMA_05G075000	GLYMA_04G079100	GLYMA_09G228000	GLYMA_13G306200	GLYMA_18G285100	GLYMA_05G032800	GLYMA_08G033000	GLYMA_06G321600	GLYMA_17G011800		GLYMA_01G061900		GLYMA_08G021700
GLYMA_09G013800	GLYMA_16G017700	GLYMA_17G105400	GLYMA_16G017700	GLYMA_02G195900	GLYMA_12G023000	GLYMA_15G239200	GLYMA_04G042100	GLYMA_12G234500	GLYMA_19G213500		GLYMA_09G013800		GLYMA_19G167200
GLYMA_01G108200	GLYMA_16G166000	GLYMA_09G150300	GLYMA_15G069900	GLYMA_16G151200	GLYMA_13G208300	GLYMA_19G171900	GLYMA_03G221300	GLYMA_07G116800	GLYMA_05G236800		GLYMA_01G108200		GLYMA_13G243800
GLYMA_14G034100	GLYMA_06G063200	GLYMA_06G061200	GLYMA_20G217600	GLYMA_11G208600	GLYMA_15G042500	GLYMA_06G154500	GLYMA_02G218000	GLYMA_09G278000	GLYMA_16G168200		GLYMA_14G034100		GLYMA_08G329600
GLYMA_09G016500	GLYMA_13G136300	GLYMA_01G216600	GLYMA_09G234700	GLYMA_02G046200	GLYMA_06G072100	GLYMA_18G225000	GLYMA_03G132700	GLYMA_16G132800	GLYMA_12G234500		GLYMA_09G016500		GLYMA_07G159700
GLYMA_05G055200	GLYMA_06G291700	GLYMA_18G267900	GLYMA_05G081800	GLYMA_08G033000	GLYMA_20G203100	GLYMA_03G192200	GLYMA_08G335000	GLYMA_09G141800	GLYMA_03G187000		GLYMA_05G055200		GLYMA_09G237000
GLYMA_01G178300	GLYMA_01G006800	GLYMA_18G295700	GLYMA_13G306200	GLYMA_02G259800	GLYMA_04G042100	GLYMA_09G228000	GLYMA_11G133300	GLYMA_20G176600	GLYMA_05G202100		GLYMA_01G178300		GLYMA_18G037800
GLYMA_10G052200	GLYMA_18G216200	GLYMA_19G219800	GLYMA_18G274200	GLYMA_13G256600	GLYMA_16G138500	GLYMA_06G052800	GLYMA_19G240800	GLYMA_19G027400	GLYMA_05G007600		GLYMA_10G052200		GLYMA_03G001600
GLYMA_11G233300	GLYMA_14G053900	GLYMA_18G225000	GLYMA_03G221300	GLYMA_17G230000	GLYMA_20G107500	GLYMA_20G077700	GLYMA_19G213500	GLYMA_17G230000	GLYMA_03G016000		GLYMA_11G233300		GLYMA_16G128800
GLYMA_15G121000	GLYMA_04G071600	GLYMA_13G136300	GLYMA_02G032400	GLYMA_17G099000	GLYMA_19G214500	GLYMA_02G218000	GLYMA_04G100600	GLYMA_12G181000	GLYMA_12G019500		GLYMA_15G121000		GLYMA_18G289600
GLYMA_10G251300	GLYMA_18G012800	GLYMA_18G285100	GLYMA_02G269400	GLYMA_11G030800	GLYMA_08G045000	GLYMA_02G034500	GLYMA_13G350300	GLYMA_05G075100	GLYMA_13G266800		GLYMA_10G251300		GLYMA_11G238800
GLYMA_08G046700	GLYMA_02G025100	GLYMA_10G048500	GLYMA_15G051900	GLYMA_04G042100	GLYMA_04G023000	GLYMA_04G227500	GLYMA_16G166000	GLYMA_17G238200	GLYMA_02G235700		GLYMA_08G046700		GLYMA_06G026600
GLYMA_02G093200	GLYMA_17G044700	GLYMA_03G035600	GLYMA_08G168400	GLYMA_17G054500	GLYMA_20G147600	GLYMA_13G049700	GLYMA_05G160200	GLYMA_10G132500	GLYMA_20G241800		GLYMA_02G093200		GLYMA_13G208300
GLYMA_02G035700	GLYMA_14G223000	GLYMA_14G101800	GLYMA_07G220300	GLYMA_12G120200	GLYMA_07G086700	GLYMA_17G259800	GLYMA_09G076200	GLYMA_04G133500	GLYMA_17G249500		GLYMA_02G035700		GLYMA_15G134400
GLYMA_03G222700	GLYMA_08G314700	GLYMA_09G061300	GLYMA_15G157400	GLYMA_01G125800	GLYMA_04G132200	GLYMA_15G012600	GLYMA_19G127200	GLYMA_03G062800	GLYMA_08G314700		GLYMA_03G222700		GLYMA_04G004600
GLYMA_06G061200	GLYMA_19G189500	GLYMA_14G207900	GLYMA_13G136300	GLYMA_10G050400	GLYMA_01G198000	GLYMA_19G247800	GLYMA_07G086700	GLYMA_19G189500	GLYMA_15G138400		GLYMA_06G061200		GLYMA_13G038600
GLYMA_13G093600	GLYMA_08G344300	GLYMA_05G032800	GLYMA_17G259500	GLYMA_13G331600	GLYMA_08G308500	GLYMA_06G022900	GLYMA_01G036900	GLYMA_06G237400	GLYMA_01G239800		GLYMA_13G093600		GLYMA_02G259800
GLYMA_10G213000	GLYMA_04G198300	GLYMA_09G076200	GLYMA_12G062700	GLYMA_18G265200	GLYMA_17G252500	GLYMA_13G136300	GLYMA_08G353500	GLYMA_05G027000	GLYMA_03G062800		GLYMA_10G213000		GLYMA_03G144700
GLYMA_19G260900	GLYMA_14G067400	GLYMA_01G100000	GLYMA_08G319200	GLYMA_04G060600	GLYMA_07G250600	GLYMA_02G287400	GLYMA_14G055900	GLYMA_12G195900	GLYMA_05G196000		GLYMA_19G260900		GLYMA_15G273700
GLYMA_09G115700	GLYMA_13G051900	GLYMA_09G259600	GLYMA_15G012600	GLYMA_14G087800	GLYMA_09G111500	GLYMA_08G191900	GLYMA_11G012900	GLYMA_20G232700	GLYMA_12G011500		GLYMA_09G115700		GLYMA_09G132200
GLYMA_03G208400	GLYMA_01G036900	GLYMA_19G247800	GLYMA_01G006800	GLYMA_03G141800	GLYMA_20G027900	GLYMA_05G160700	GLYMA_15G005700	GLYMA_07G125100	GLYMA_19G175200		GLYMA_03G208400		GLYMA_16G017400
GLYMA_18G191200	GLYMA_02G299300	GLYMA_01G225100	GLYMA_16G061400	GLYMA_03G139500	GLYMA_13G130600	GLYMA_20G147200	GLYMA_12G187100	GLYMA_01G209500	GLYMA_13G306900		GLYMA_18G191200		GLYMA_09G018100
GLYMA_05G057500	GLYMA_04G177800	GLYMA_15G196300	GLYMA_18G298000	GLYMA_08G039400	GLYMA_02G063400	GLYMA_13G130600	GLYMA_08G033100	GLYMA_13G191900	GLYMA_16G186400		GLYMA_05G057500		GLYMA_07G019800
GLYMA_10G295300	GLYMA_03G040100	GLYMA_08G053700	GLYMA_14G197500	GLYMA_03G008100	GLYMA_10G029600	GLYMA_18G077000	GLYMA_11G180600	GLYMA_15G042500	GLYMA_10G082500		GLYMA_10G295300		GLYMA_12G063400
GLYMA_03G013300	GLYMA_18G109600	GLYMA_19G189500	GLYMA_14G016100	GLYMA_01G031300	GLYMA_16G148600	GLYMA_03G040100	GLYMA_02G285000	GLYMA_15G032500	GLYMA_11G158200		GLYMA_03G013300		GLYMA_06G125700
GLYMA_17G054500	GLYMA_11G044700	GLYMA_09G092600	GLYMA_19G219800	GLYMA_17G131200	GLYMA_13G280500	GLYMA_10G054200	GLYMA_15G012600	GLYMA_01G124500	GLYMA_09G014900		GLYMA_17G054500		GLYMA_09G029600
GLYMA_12G105700	GLYMA_09G184000	GLYMA_12G197900	GLYMA_18G225000	GLYMA_09G075200	GLYMA_19G027400	GLYMA_19G213500	GLYMA_03G171900	GLYMA_08G329600	GLYMA_12G187100		GLYMA_12G105700		GLYMA_13G206700
GLYMA_11G158200	GLYMA_09G191800	GLYMA_12G149500	GLYMA_14G115500	GLYMA_19G127200	GLYMA_15G210500	GLYMA_08G188600	GLYMA_14G066000	GLYMA_10G004800	GLYMA_16G179100		GLYMA_11G158200		GLYMA_13G089800
GLYMA_20G196200	GLYMA_18G286700	GLYMA_09G177800	GLYMA_03G132700	GLYMA_11G162500	GLYMA_05G181100	GLYMA_11G180600	GLYMA_04G114100	GLYMA_11G124200	GLYMA_18G173300		GLYMA_20G196200		GLYMA_02G069700
GLYMA_15G258600	GLYMA_13G306600	GLYMA_04G238400	GLYMA_12G213900	GLYMA_19G171900	GLYMA_01G108200	GLYMA_19G110600	GLYMA_14G094500	GLYMA_02G080700	GLYMA_01G012700		GLYMA_15G258600		GLYMA_13G250900
GLYMA_03G132700	GLYMA_10G229800	GLYMA_14G053900	GLYMA_18G152800	GLYMA_15G210600	GLYMA_17G029500	GLYMA_05G075100	GLYMA_02G239300	GLYMA_02G035700	GLYMA_15G011200		GLYMA_03G132700		GLYMA_15G136700
GLYMA_12G132800	GLYMA_20G196100	GLYMA_10G247500	GLYMA_18G030700	GLYMA_14G094500	GLYMA_02G216600	GLYMA_09G012200	GLYMA_20G241800	GLYMA_01G085200	GLYMA_10G241700		GLYMA_12G132800		GLYMA_07G155200
GLYMA_09G012200	GLYMA_06G154500	GLYMA_14G223000	GLYMA_20G232700	GLYMA_11G223000	GLYMA_11G062600	GLYMA_16G151200	GLYMA_08G269300	GLYMA_10G247600	GLYMA_20G203100		GLYMA_09G012200		GLYMA_10G189400
GLYMA_02G228000	GLYMA_03G114300	GLYMA_15G014500	GLYMA_13G043000	GLYMA_04G227500	GLYMA_08G085700	GLYMA_14G116300	GLYMA_14G223000	GLYMA_08G221600	GLYMA_16G190900		GLYMA_02G228000		GLYMA_12G195900
GLYMA_02G060800	GLYMA_04G100200	GLYMA_01G036900	GLYMA_09G100100	GLYMA_14G197500	GLYMA_18G289100	GLYMA_13G341800	GLYMA_02G063400	GLYMA_03G139500	GLYMA_17G171500		GLYMA_02G060800		GLYMA_19G111700
GLYMA_16G179100	GLYMA_16G146800	GLYMA_16G124700	GLYMA_08G053700	GLYMA_10G090000	GLYMA_03G016900	GLYMA_02G153900	GLYMA_19G247800	GLYMA_19G218300	GLYMA_06G019000		GLYMA_16G179100		GLYMA_03G145500
GLYMA_09G228000	GLYMA_17G054500	GLYMA_03G006800	GLYMA_07G049100	GLYMA_07G159700	GLYMA_01G219100	GLYMA_16G046300	GLYMA_19G199800	GLYMA_13G206700	GLYMA_03G204900		GLYMA_09G228000		GLYMA_18G265200
GLYMA_06G160300	GLYMA_07G201000	GLYMA_01G031300	GLYMA_19G046300	GLYMA_13G160400	GLYMA_13G331600	GLYMA_18G071400	GLYMA_01G061900	GLYMA_05G196000	GLYMA_06G062500		GLYMA_06G160300		GLYMA_15G057700
GLYMA_17G139500	GLYMA_05G160200	GLYMA_18G058000	GLYMA_09G238000	GLYMA_16G206300	GLYMA_18G267900	GLYMA_03G146400	GLYMA_18G295700	GLYMA_18G099500	GLYMA_19G026000		GLYMA_17G139500		GLYMA_02G046200
GLYMA_02G196300	GLYMA_01G100000	GLYMA_04G047600	GLYMA_18G260900	GLYMA_13G056500	GLYMA_11G044700	GLYMA_03G216100	GLYMA_19G111700	GLYMA_05G094300	GLYMA_18G206600		GLYMA_02G196300		GLYMA_06G289900
GLYMA_05G003000	GLYMA_14G055900	GLYMA_15G273700	GLYMA_09G222200	GLYMA_15G058300	GLYMA_17G044700	GLYMA_08G033100	GLYMA_15G239200	GLYMA_13G259500	GLYMA_03G042700		GLYMA_05G003000		GLYMA_17G015400
GLYMA_01G022300	GLYMA_04G136000	GLYMA_08G279600	GLYMA_02G040200	GLYMA_18G077000	GLYMA_09G234700	GLYMA_17G105400	GLYMA_02G087900	GLYMA_10G160800	GLYMA_13G216200		GLYMA_01G022300		GLYMA_11G052200
GLYMA_05G160200	GLYMA_13G160400	GLYMA_09G028400	GLYMA_13G350400	GLYMA_06G100500	GLYMA_13G319100	GLYMA_08G329600	GLYMA_05G075100	GLYMA_01G221600	GLYMA_18G249000		GLYMA_05G160200		GLYMA_05G008300
GLYMA_08G307300	GLYMA_11G158200	GLYMA_16G188800	GLYMA_19G222500	GLYMA_19G114600	GLYMA_06G125800	GLYMA_05G051400	GLYMA_14G018800	GLYMA_13G306200	GLYMA_02G082500		GLYMA_08G307300		GLYMA_11G140500
GLYMA_12G008100	GLYMA_05G051400	GLYMA_13G359700	GLYMA_18G109600	GLYMA_14G009000	GLYMA_19G189500	GLYMA_01G178300	GLYMA_12G196200	GLYMA_13G040100	GLYMA_15G147000		GLYMA_12G008100		GLYMA_11G124200
GLYMA_17G234800	GLYMA_16G061400	GLYMA_13G047800	GLYMA_03G252800	GLYMA_04G003200	GLYMA_03G163100	GLYMA_08G056700	GLYMA_19G171900	GLYMA_13G219200	GLYMA_18G106400		GLYMA_17G234800		GLYMA_06G189900
GLYMA_04G006800	GLYMA_05G042800	GLYMA_12G019500	GLYMA_17G211900	GLYMA_16G124700	GLYMA_02G242900	GLYMA_02G195900	GLYMA_13G196200	GLYMA_08G132700	GLYMA_16G188800		GLYMA_04G006800		GLYMA_04G220700
GLYMA_13G288000	GLYMA_11G101300	GLYMA_08G309700	GLYMA_09G031600	GLYMA_05G055300	GLYMA_06G189900	GLYMA_20G196200	GLYMA_03G252800	GLYMA_18G263700	GLYMA_12G044700		GLYMA_13G288000		GLYMA_11G095700
GLYMA_13G350300	GLYMA_02G218000	GLYMA_12G007100	GLYMA_20G241800	GLYMA_16G128800	GLYMA_11G246300	GLYMA_09G018100	GLYMA_03G221400	GLYMA_20G221400	GLYMA_16G092900		GLYMA_13G350300		GLYMA_08G240100
GLYMA_20G186200	GLYMA_11G246300	GLYMA_01G020400	GLYMA_18G038000	GLYMA_U044600	GLYMA_19G104200	GLYMA_08G106400	GLYMA_17G107800	GLYMA_12G013100	GLYMA_10G081900		GLYMA_20G186200		GLYMA_02G277600
GLYMA_05G160700	GLYMA_05G226100	GLYMA_12G008100	GLYMA_04G136000	GLYMA_08G056700	GLYMA_07G137800	GLYMA_16G124700	GLYMA_04G227500	GLYMA_04G109900	GLYMA_09G094400		GLYMA_05G160700		GLYMA_01G137200
GLYMA_07G141100	GLYMA_11G164800	GLYMA_05G055300	GLYMA_18G186900	GLYMA_18G295700	GLYMA_01G178300	GLYMA_07G271800	GLYMA_04G010600	GLYMA_17G132800	GLYMA_07G258800		GLYMA_07G141100		GLYMA_01G085200
ENSRNA050030624	GLYMA_18G152400	GLYMA_13G219100	GLYMA_06G004500	GLYMA_08G188600	GLYMA_03G217700	GLYMA_12G121200	GLYMA_08G168400	GLYMA_05G226100	GLYMA_15G150200		ENSRNA050030624		GLYMA_12G097800
GLYMA_18G127900	GLYMA_13G141200	GLYMA_03G216200	GLYMA_12G195900	GLYMA_09G022500	GLYMA_06G309200	GLYMA_06G096200	GLYMA_02G003800	GLYMA_08G109400	GLYMA_05G013700		GLYMA_18G127900		GLYMA_06G163200
GLYMA_09G095900	GLYMA_03G221400	GLYMA_17G236500	GLYMA_12G063900	GLYMA_07G205200	GLYMA_13G306300	GLYMA_13G183700	GLYMA_20G077700	GLYMA_03G006800	GLYMA_12G063400		GLYMA_09G095900		GLYMA_01G221600
GLYMA_05G202100	GLYMA_03G217800	GLYMA_02G222100	GLYMA_10G071000	GLYMA_20G176600	GLYMA_19G013000	GLYMA_13G183500	GLYMA_03G008100	GLYMA_11G056600	GLYMA_15G159300		GLYMA_05G202100		GLYMA_07G220300
GLYMA_14G099800	GLYMA_18G285100	GLYMA_13G288000	GLYMA_08G033000	GLYMA_04G052200	GLYMA_10G283700	GLYMA_19G218300	GLYMA_18G213000	GLYMA_15G138400	GLYMA_11G074900		GLYMA_14G099800		GLYMA_03G116200
GLYMA_18G263700	GLYMA_14G147100	GLYMA_20G196100	GLYMA_03G040100	GLYMA_14G016800	GLYMA_15G018700	GLYMA_01G221600	GLYMA_05G049300	GLYMA_03G001600	GLYMA_05G124900		GLYMA_18G263700		GLYMA_09G201900
GLYMA_12G195600	GLYMA_12G023300	GLYMA_08G003400	GLYMA_15G024200	GLYMA_09G247700	GLYMA_10G028900	GLYMA_04G239500	GLYMA_17G236500	GLYMA_18G071400	GLYMA_10G159700		GLYMA_12G195600		GLYMA_16G206300
GLYMA_05G055300	GLYMA_17G066100	GLYMA_01G044800	GLYMA_04G031300	GLYMA_11G133300	GLYMA_18G279300	GLYMA_03G069200	GLYMA_16G124700	GLYMA_19G013000	GLYMA_19G005700		GLYMA_05G055300		GLYMA_12G053800
GLYMA_04G040500	GLYMA_11G124200	GLYMA_06G073300	GLYMA_12G197000	GLYMA_09G166300	GLYMA_13G306900	GLYMA_08G068700	GLYMA_02G222000	GLYMA_20G156300	GLYMA_06G240900		GLYMA_04G040500		GLYMA_20G142100
GLYMA_11G003400	GLYMA_17G253800	GLYMA_17G131200	GLYMA_06G165100	GLYMA_15G061700	GLYMA_07G010000	GLYMA_05G055300	GLYMA_13G183000	GLYMA_13G150100	GLYMA_10G071000		GLYMA_11G003400		GLYMA_14G210600
GLYMA_03G116000	GLYMA_03G138900	GLYMA_17G223400	GLYMA_11G037200	GLYMA_15G239300	GLYMA_12G120200	GLYMA_17G029500	GLYMA_13G331600	GLYMA_14G029900	GLYMA_01G116300		GLYMA_03G116000		GLYMA_04G165900
GLYMA_07G031200	GLYMA_06G239500	GLYMA_13G040100	GLYMA_08G289300	GLYMA_04G106400	GLYMA_05G234500	GLYMA_09G170500	GLYMA_05G181100	GLYMA_19G128400	GLYMA_17G211900		GLYMA_07G031200		GLYMA_13G283900
GLYMA_06G125500	GLYMA_18G077000	GLYMA_11G003300	GLYMA_04G133400	GLYMA_06G240400	GLYMA_12G063400	GLYMA_11G208600	GLYMA_17G044700	GLYMA_04G079100	GLYMA_18G269700		GLYMA_06G125500		GLYMA_13G306200
GLYMA_15G093000	GLYMA_14G031100	GLYMA_05G042800	GLYMA_10G256100	GLYMA_08G021700	GLYMA_12G097800	GLYMA_02G185400	GLYMA_07G271800	GLYMA_19G030100	GLYMA_02G156000		GLYMA_15G093000		GLYMA_11G104200
GLYMA_17G230000	GLYMA_13G350400	GLYMA_11G022100	GLYMA_13G038600	GLYMA_02G143200	GLYMA_17G139500	GLYMA_14G223000	GLYMA_19G212700	GLYMA_15G229400	GLYMA_01G129700		GLYMA_17G230000		GLYMA_04G221700
GLYMA_05G226100	GLYMA_02G219800	GLYMA_18G108700	GLYMA_08G344300	GLYMA_03G216100	GLYMA_17G230000	GLYMA_02G093200	GLYMA_13G160500	GLYMA_01G178300	GLYMA_11G216700		GLYMA_05G226100		GLYMA_15G002200
GLYMA_10G247500	GLYMA_13G130600	GLYMA_15G201700	GLYMA_06G084700	GLYMA_02G069700	GLYMA_03G187000	GLYMA_10G247600	GLYMA_10G048500	GLYMA_02G301100	GLYMA_03G041300		GLYMA_10G247500		GLYMA_14G213100
GLYMA_15G239200	GLYMA_12G197900	GLYMA_13G206700	GLYMA_10G155300	GLYMA_15G134400	GLYMA_04G048500	GLYMA_03G217700	GLYMA_17G166900	GLYMA_05G001500	GLYMA_04G099200		GLYMA_15G239200		GLYMA_19G023200
GLYMA_05G154000	GLYMA_12G195600	GLYMA_13G183700	GLYMA_13G066600	GLYMA_08G003400	GLYMA_05G094900	GLYMA_03G083700	GLYMA_07G088000	GLYMA_19G037600	GLYMA_16G173900		GLYMA_05G154000		GLYMA_13G303700
GLYMA_20G196100	GLYMA_19G207000	GLYMA_08G366700	GLYMA_05G045600	GLYMA_02G228000	GLYMA_17G065100	GLYMA_05G094900	GLYMA_19G189500	GLYMA_13G147600	GLYMA_01G210500		GLYMA_20G196100		GLYMA_18G043800
GLYMA_14G067700	GLYMA_12G196200	GLYMA_04G060600	GLYMA_09G038900	GLYMA_07G126900	GLYMA_19G159200	GLYMA_18G147000	GLYMA_13G031000	GLYMA_20G203500	GLYMA_04G133400		GLYMA_14G067700		GLYMA_08G344300
GLYMA_10G081900	GLYMA_14G220600	GLYMA_13G365900	GLYMA_14G018100	GLYMA_13G160500	GLYMA_17G224900	GLYMA_19G260900	GLYMA_11G109200	GLYMA_06G113500	GLYMA_09G240400		GLYMA_10G081900		GLYMA_13G307000
GLYMA_09G061300	GLYMA_03G163100	GLYMA_20G147600	GLYMA_04G019200	GLYMA_12G187100	GLYMA_02G156000	GLYMA_18G295700	GLYMA_04G043500	GLYMA_04G026700	GLYMA_07G076100		GLYMA_09G061300		GLYMA_18G260500
GLYMA_05G241300	GLYMA_13G319100	GLYMA_20G234200	GLYMA_03G170900	GLYMA_15G222100	GLYMA_20G216000	GLYMA_13G044500	GLYMA_12G019500	GLYMA_17G224500	GLYMA_16G192600		GLYMA_05G241300		GLYMA_08G032900
GLYMA_07G201000	GLYMA_17G260200	GLYMA_03G162600	GLYMA_13G160500	GLYMA_19G247800	GLYMA_06G102400	GLYMA_15G258600	GLYMA_11G057800	GLYMA_12G195600	GLYMA_08G019900		GLYMA_07G201000		GLYMA_20G062500
GLYMA_12G115600	GLYMA_20G176600	GLYMA_08G335000	GLYMA_04G022100	GLYMA_04G071600	GLYMA_11G256500	GLYMA_13G057600	GLYMA_15G042500	GLYMA_08G254600	GLYMA_07G108200		GLYMA_12G115600		GLYMA_17G111100
GLYMA_04G109900	GLYMA_09G126500	GLYMA_11G158200	GLYMA_13G055100	GLYMA_20G194900	GLYMA_04G100600	GLYMA_05G042800	GLYMA_15G097400	GLYMA_02G189700	GLYMA_15G257700		GLYMA_04G109900		GLYMA_10G154100
GLYMA_08G309700	GLYMA_11G074900	GLYMA_05G049300	GLYMA_09G132200	GLYMA_03G221400	GLYMA_03G132700	GLYMA_10G218900	GLYMA_06G010500	GLYMA_11G030800	GLYMA_14G101800		GLYMA_08G309700		GLYMA_10G031200
GLYMA_14G068400	GLYMA_12G164900	GLYMA_19G221800	GLYMA_13G148700	GLYMA_12G181000	GLYMA_04G225400	GLYMA_14G031100	GLYMA_10G247300	GLYMA_16G124700	GLYMA_05G160700		GLYMA_14G068400		GLYMA_13G160400
GLYMA_14G067400	GLYMA_19G159300	GLYMA_06G307600	GLYMA_01G178300	GLYMA_19G030100	GLYMA_03G062800	GLYMA_11G150700	GLYMA_06G061200	GLYMA_01G239800	GLYMA_18G084600		GLYMA_14G067400		GLYMA_15G243000
GLYMA_10G283700	GLYMA_01G219100	GLYMA_02G143200	GLYMA_18G238100	GLYMA_05G032800	GLYMA_20G217600	GLYMA_04G003200	GLYMA_06G324200	GLYMA_01G168500	GLYMA_13G233400		GLYMA_10G283700		GLYMA_09G022400
GLYMA_19G004400	GLYMA_09G129800	GLYMA_08G336300	GLYMA_06G100500	GLYMA_02G160800	GLYMA_06G125700	GLYMA_15G121000	GLYMA_20G189600	GLYMA_20G196200	GLYMA_19G027400		GLYMA_19G004400		GLYMA_16G124700
GLYMA_15G007400	GLYMA_12G120200	GLYMA_17G238200	GLYMA_12G063400	GLYMA_15G239600	GLYMA_08G353500	GLYMA_06G026600	GLYMA_05G125000	GLYMA_07G039000	GLYMA_10G230200		GLYMA_15G007400		GLYMA_02G272100
GLYMA_04G152900	GLYMA_10G011000	GLYMA_01G126500	GLYMA_13G094100	GLYMA_09G076200	GLYMA_05G055400	GLYMA_06G061200	GLYMA_18G077000	GLYMA_06G189900	GLYMA_13G066100		GLYMA_04G152900		GLYMA_02G126100
GLYMA_13G147600	GLYMA_05G055300	GLYMA_19G226000	GLYMA_01G091900	GLYMA_08G106400	GLYMA_19G037600	GLYMA_09G166300	GLYMA_17G065400	GLYMA_03G132700	GLYMA_18G267800		GLYMA_13G147600		GLYMA_09G029400
GLYMA_10G247600	GLYMA_15G024200	GLYMA_04G227500	GLYMA_15G002200	GLYMA_07G202500	GLYMA_03G101800	GLYMA_11G164000	GLYMA_05G202100	GLYMA_12G171100	GLYMA_07G183900		GLYMA_10G247600		GLYMA_06G006100
GLYMA_20G154500	GLYMA_07G107200	GLYMA_04G003200	GLYMA_08G314700	GLYMA_19G144400	GLYMA_02G218000	GLYMA_15G014500	GLYMA_11G164800	GLYMA_01G230000	GLYMA_06G125700		GLYMA_20G154500		GLYMA_10G182800
ENSRNA050030686	GLYMA_13G160500	GLYMA_08G188600	GLYMA_01G034900	GLYMA_02G028000	GLYMA_13G349300	GLYMA_17G236500	GLYMA_01G186700	GLYMA_08G200600	GLYMA_08G197800		ENSRNA050030686		GLYMA_13G094100
GLYMA_12G011400	GLYMA_19G033800	GLYMA_12G108500	GLYMA_11G168000	GLYMA_12G152100	GLYMA_11G037200	GLYMA_11G012400	GLYMA_01G125800	GLYMA_06G102400	GLYMA_02G157300		GLYMA_12G011400		GLYMA_04G205100
ENSRNA050030622	GLYMA_18G121400	GLYMA_08G230700	GLYMA_11G219400	GLYMA_03G006800	GLYMA_01G186700	GLYMA_18G091300	GLYMA_19G082000	GLYMA_05G051400	GLYMA_20G027900		ENSRNA050030622		GLYMA_17G262300
GLYMA_18G251000	GLYMA_18G049500	GLYMA_13G306900	GLYMA_17G141700	GLYMA_19G224300	GLYMA_12G195900	GLYMA_01G198000	GLYMA_12G132800	GLYMA_17G107800	GLYMA_02G154300		GLYMA_18G251000		GLYMA_08G028800
GLYMA_05G037900	GLYMA_18G123100	GLYMA_16G128800	GLYMA_06G019000	GLYMA_08G279600	GLYMA_17G138500	GLYMA_16G206300	GLYMA_08G329600	GLYMA_06G010500	GLYMA_18G118300		GLYMA_05G037900		GLYMA_13G056500
GLYMA_12G023700	GLYMA_17G212200	GLYMA_11G052200	GLYMA_15G089100	GLYMA_13G031500	GLYMA_18G269700	GLYMA_18G289100	GLYMA_02G080800	GLYMA_08G227700	GLYMA_09G045600		GLYMA_12G023700		GLYMA_06G113500
GLYMA_14G101800	GLYMA_04G060800	GLYMA_16G181900	GLYMA_15G241700	GLYMA_11G037200	GLYMA_02G002700	GLYMA_05G202100	GLYMA_13G136300	GLYMA_13G341800	GLYMA_01G108200		GLYMA_14G101800		GLYMA_15G133900
GLYMA_09G094400	GLYMA_15G149600	GLYMA_02G043200	GLYMA_19G242000	GLYMA_15G201700	GLYMA_12G097600	GLYMA_11G074900	GLYMA_02G016500	GLYMA_07G086700	GLYMA_16G082200		GLYMA_09G094400		GLYMA_16G034300
GLYMA_18G106400	GLYMA_08G229100	GLYMA_06G215200	GLYMA_09G278000	GLYMA_18G030700	GLYMA_01G225100	GLYMA_11G250000	GLYMA_13G206700	GLYMA_15G181800	GLYMA_06G261100		GLYMA_18G106400		GLYMA_10G189700
GLYMA_05G140700	GLYMA_13G196200	GLYMA_13G306300	GLYMA_12G195600	GLYMA_10G154200	GLYMA_08G275700	GLYMA_08G221600	GLYMA_05G226100	GLYMA_13G250900	GLYMA_13G123600		GLYMA_05G140700		GLYMA_18G077000
GLYMA_13G219200	GLYMA_02G035700	GLYMA_14G173600	GLYMA_12G105700	GLYMA_17G065100	GLYMA_10G230200	GLYMA_01G230000	GLYMA_14G173600	GLYMA_18G012300	GLYMA_03G104800		GLYMA_13G219200		GLYMA_10G250200
GLYMA_04G133400	GLYMA_11G185100	GLYMA_02G292100	GLYMA_14G164900	GLYMA_18G236700	GLYMA_10G247300	GLYMA_03G157800	GLYMA_10G026100	GLYMA_04G221700	GLYMA_13G141200		GLYMA_04G133400		GLYMA_01G124700
GLYMA_10G132500	GLYMA_12G234500	GLYMA_01G229600	GLYMA_06G215200	GLYMA_19G014500	GLYMA_02G235700	GLYMA_10G229800	GLYMA_14G099800	GLYMA_06G061200	GLYMA_16G206900		GLYMA_10G132500		GLYMA_17G131200
GLYMA_08G336300	GLYMA_07G069500	GLYMA_06G240400	GLYMA_08G254600	GLYMA_18G034600	GLYMA_08G319200	GLYMA_13G256600	GLYMA_16G128800	ENSRNA050030515	GLYMA_13G119000		GLYMA_08G336300		GLYMA_15G061700
GLYMA_20G103600	GLYMA_12G195900	GLYMA_16G063400	GLYMA_09G068700	GLYMA_19G042900	GLYMA_08G003400	GLYMA_17G238200	GLYMA_17G259800	GLYMA_09G028400	GLYMA_U028500		GLYMA_20G103600		GLYMA_10G154200
GLYMA_03G069200	GLYMA_09G061300	GLYMA_08G329600	GLYMA_11G074900	GLYMA_18G147000	GLYMA_01G113400	GLYMA_19G174900	GLYMA_18G071400	GLYMA_10G260800	GLYMA_09G064200		GLYMA_03G069200		GLYMA_09G263100
GLYMA_03G104800	GLYMA_14G094500	GLYMA_15G211700	GLYMA_19G183800	GLYMA_20G087900	GLYMA_08G227700	GLYMA_16G181900	GLYMA_01G198000	GLYMA_13G081000	GLYMA_14G052600		GLYMA_03G104800		GLYMA_18G261800
GLYMA_12G084000	GLYMA_13G208000	GLYMA_03G221400	GLYMA_16G192400	GLYMA_05G125000	GLYMA_18G205800	GLYMA_04G133400	GLYMA_07G218500	GLYMA_15G002300	GLYMA_15G024600		GLYMA_12G084000		GLYMA_01G243200
GLYMA_13G057600	GLYMA_08G033100	GLYMA_11G160600	GLYMA_13G147600	GLYMA_11G244900	GLYMA_07G009900	GLYMA_16G188900	GLYMA_14G034000	GLYMA_02G093200	GLYMA_18G285100		GLYMA_13G057600		GLYMA_02G259200
GLYMA_14G018800	GLYMA_18G225000	GLYMA_02G252600	GLYMA_11G045000	GLYMA_10G182800	GLYMA_18G274200	GLYMA_02G046200	GLYMA_18G091300	GLYMA_07G186700	GLYMA_02G060800		GLYMA_14G018800		GLYMA_13G049700
GLYMA_01G047800	GLYMA_05G245900	GLYMA_08G138500	GLYMA_13G358000	GLYMA_06G052800	GLYMA_16G188900	GLYMA_16G063400	GLYMA_19G042900	GLYMA_13G277800	GLYMA_02G196200		GLYMA_01G047800		GLYMA_06G196600
GLYMA_13G178800	GLYMA_14G134900	GLYMA_10G229800	GLYMA_11G158200	GLYMA_14G223000	GLYMA_09G237000	GLYMA_03G144700	GLYMA_20G147200	GLYMA_13G094100	GLYMA_13G267000		GLYMA_13G178800		GLYMA_18G278100
ENSRNA050030629	GLYMA_20G049800	GLYMA_12G096900	GLYMA_14G031100	GLYMA_09G071300	GLYMA_12G044700	GLYMA_03G001600	GLYMA_13G183500	GLYMA_12G011500	GLYMA_18G031900		ENSRNA050030629		GLYMA_09G031600
GLYMA_12G013100	GLYMA_02G310700	GLYMA_19G235300	GLYMA_13G079300	GLYMA_11G012400	GLYMA_19G242000	GLYMA_19G127200	GLYMA_14G207900	GLYMA_08G341100	GLYMA_16G057400		GLYMA_12G013100		GLYMA_15G201700
GLYMA_09G234700	GLYMA_10G283700	GLYMA_04G042100	GLYMA_07G069500	GLYMA_17G107800	GLYMA_05G109600	GLYMA_04G023000	GLYMA_08G053700	GLYMA_18G186900	GLYMA_09G075200		GLYMA_09G234700		GLYMA_08G308300
GLYMA_07G205700	GLYMA_15G157400	GLYMA_11G256100	GLYMA_13G306600	GLYMA_03G201800	GLYMA_17G260200	GLYMA_17G241300	GLYMA_06G014100	GLYMA_15G124000	GLYMA_20G213700		GLYMA_07G205700		GLYMA_15G002300
GLYMA_01G171700	GLYMA_20G217600	GLYMA_01G047800	GLYMA_03G101800	GLYMA_13G183700	GLYMA_12G011500	GLYMA_17G107800	GLYMA_20G032000	GLYMA_11G012400	GLYMA_20G196000		GLYMA_01G171700		GLYMA_07G027300
GLYMA_05G066000	GLYMA_17G203600	GLYMA_02G046200	GLYMA_13G108500	GLYMA_09G111500	GLYMA_17G157400	GLYMA_11G158200	GLYMA_19G250400	GLYMA_01G195500	GLYMA_04G221700		GLYMA_05G066000		GLYMA_02G048700
GLYMA_13G306900	GLYMA_20G154500	GLYMA_07G088000	GLYMA_06G309200	GLYMA_14G064000	GLYMA_03G218800	GLYMA_13G114200	GLYMA_02G299200	GLYMA_15G005700	GLYMA_02G292100		GLYMA_13G306900		GLYMA_11G068700
GLYMA_07G181300	GLYMA_08G270000	GLYMA_02G069700	GLYMA_05G013700	GLYMA_20G197700	GLYMA_02G052700	GLYMA_20G176600	GLYMA_13G178800	GLYMA_19G238400	GLYMA_03G132700		GLYMA_07G181300		GLYMA_18G245100
GLYMA_05G007600	GLYMA_19G230100	GLYMA_12G183300	GLYMA_09G042900	GLYMA_14G101800	GLYMA_07G210100	GLYMA_18G057200	GLYMA_13G160400	GLYMA_12G082700	GLYMA_05G049900		GLYMA_05G007600		GLYMA_01G168500
ENSRNA050002786	GLYMA_13G299000	GLYMA_13G341800	GLYMA_12G097800	GLYMA_20G094400	GLYMA_08G200600	GLYMA_11G216700	GLYMA_20G196200	GLYMA_03G041200	GLYMA_07G203700		ENSRNA050002786		GLYMA_13G133200
GLYMA_12G234500	GLYMA_20G196000	GLYMA_01G137200	GLYMA_03G144700	GLYMA_07G181300	GLYMA_04G013400	GLYMA_06G027200	GLYMA_02G252600	GLYMA_13G319100	GLYMA_18G078000		GLYMA_12G234500		GLYMA_05G214900
GLYMA_07G067200	GLYMA_01G129700	GLYMA_05G004600	GLYMA_17G031600	GLYMA_05G025600	GLYMA_02G196200	GLYMA_20G241800	GLYMA_15G032500	GLYMA_12G120200	GLYMA_05G055400		GLYMA_07G067200		GLYMA_16G155100
GLYMA_06G022900	GLYMA_06G237400	GLYMA_06G179200	ENSRNA050002967	GLYMA_06G278900	GLYMA_18G118300	GLYMA_03G163100	GLYMA_02G289600	GLYMA_14G097000	GLYMA_15G229400		GLYMA_06G022900		GLYMA_03G063000
GLYMA_14G094500	GLYMA_09G031600	GLYMA_16G151200	GLYMA_17G066100	GLYMA_06G000600	GLYMA_01G129100	GLYMA_11G012900	GLYMA_08G011700	GLYMA_08G366700	GLYMA_04G190600		GLYMA_14G094500		GLYMA_08G229100
GLYMA_14G051800	GLYMA_18G288800	GLYMA_08G030100	GLYMA_20G147200	GLYMA_14G111100	GLYMA_19G159000	GLYMA_13G155100	GLYMA_13G279800	GLYMA_19G247800	GLYMA_05G029000		GLYMA_14G051800		GLYMA_10G077800
GLYMA_20G137900	GLYMA_06G084700	GLYMA_05G007600	GLYMA_17G011800	GLYMA_11G056600	GLYMA_13G095500	GLYMA_20G062500	GLYMA_04G100200	GLYMA_15G237600	GLYMA_03G144700		GLYMA_20G137900		GLYMA_09G247700
GLYMA_10G029600	GLYMA_13G280500	GLYMA_11G012400	GLYMA_18G252300	GLYMA_16G063400	GLYMA_19G171900	GLYMA_02G181600	GLYMA_06G154500	GLYMA_08G335000	GLYMA_03G059800		GLYMA_10G029600		GLYMA_18G152400
GLYMA_08G253400	GLYMA_17G231900	GLYMA_09G166300	GLYMA_14G068300	GLYMA_03G168200	GLYMA_20G224300	GLYMA_03G139500	GLYMA_06G116100	GLYMA_13G312700	GLYMA_01G124500		GLYMA_08G253400		GLYMA_14G056300
GLYMA_15G032500	GLYMA_07G009900	GLYMA_16G048000	GLYMA_17G029700	GLYMA_18G286700	GLYMA_15G005600	GLYMA_06G010500	GLYMA_16G151200	GLYMA_08G106400	GLYMA_17G230000		GLYMA_15G032500		GLYMA_01G158000
GLYMA_19G026000	GLYMA_06G215200	GLYMA_10G182800	GLYMA_15G066200	GLYMA_11G164800	GLYMA_13G191900	GLYMA_12G189000	GLYMA_17G223400	GLYMA_17G105400	GLYMA_19G171800		GLYMA_19G026000		GLYMA_13G369900
GLYMA_06G037900	GLYMA_17G006900	GLYMA_19G042900	GLYMA_09G178600	GLYMA_08G003500	GLYMA_13G365900	GLYMA_18G012800	GLYMA_04G225400	GLYMA_13G089800	GLYMA_20G139400		GLYMA_06G037900		GLYMA_13G345400
GLYMA_20G163500	GLYMA_07G049100	GLYMA_09G190200	GLYMA_19G213500	GLYMA_06G166500	GLYMA_09G259600	GLYMA_05G072200	GLYMA_17G131200	GLYMA_15G012600	GLYMA_19G120600		GLYMA_20G163500		GLYMA_09G238800
GLYMA_07G108200	GLYMA_13G349300	GLYMA_18G037800	GLYMA_05G042800	GLYMA_16G166000	GLYMA_20G144300	GLYMA_05G226100	GLYMA_02G160800	GLYMA_10G155300	GLYMA_18G289100		GLYMA_07G108200		GLYMA_05G050400
GLYMA_13G191900	GLYMA_13G300400	GLYMA_03G217800	GLYMA_13G341500	GLYMA_18G266100	GLYMA_19G238400	GLYMA_02G222000	GLYMA_08G279600	GLYMA_11G034300	GLYMA_02G218000		GLYMA_13G191900		GLYMA_01G036000
GLYMA_17G065400	GLYMA_11G244900	GLYMA_17G107800	ENSRNA049760259	GLYMA_14G207900	GLYMA_13G062500	GLYMA_01G036900	GLYMA_20G216000	GLYMA_08G088000	GLYMA_16G053000		GLYMA_17G065400		GLYMA_02G203300
GLYMA_06G166500	GLYMA_09G132200	GLYMA_02G195900	GLYMA_04G170800	GLYMA_02G028800	GLYMA_09G276700	GLYMA_10G154100	GLYMA_11G052200	GLYMA_16G017400	GLYMA_01G078600		GLYMA_06G166500		GLYMA_13G051000
GLYMA_07G107200	GLYMA_02G092500	GLYMA_01G133600	GLYMA_11G124200	GLYMA_15G093000	GLYMA_15G032500	GLYMA_18G253500	GLYMA_09G028400	GLYMA_03G186900	GLYMA_05G121900		GLYMA_07G107200		GLYMA_13G215000
GLYMA_13G304100	GLYMA_15G021200	GLYMA_20G119000	GLYMA_07G027300	GLYMA_17G198700	GLYMA_08G109400	GLYMA_12G191000	GLYMA_15G201700	GLYMA_13G306900	GLYMA_08G240100		GLYMA_13G304100		GLYMA_10G011500
GLYMA_13G306300	GLYMA_09G256100	GLYMA_03G138900	GLYMA_17G094500	GLYMA_07G210000	GLYMA_09G132200	GLYMA_07G027300	GLYMA_15G002300	GLYMA_07G084200	GLYMA_08G057400		GLYMA_13G306300		GLYMA_20G035200
GLYMA_09G064200	GLYMA_17G048500	GLYMA_20G216000	GLYMA_13G362800	GLYMA_02G048700	GLYMA_15G002300	GLYMA_14G101800	GLYMA_17G229000	GLYMA_02G156000	GLYMA_14G212600		GLYMA_09G064200		GLYMA_17G086500
GLYMA_15G144000	GLYMA_17G094500	GLYMA_13G214400	GLYMA_02G235900	GLYMA_08G366700	GLYMA_12G013100	GLYMA_01G229600	GLYMA_01G229600	GLYMA_06G240400	GLYMA_03G044900		GLYMA_15G144000		GLYMA_15G229400
GLYMA_01G239800	GLYMA_02G147500	GLYMA_10G081900	GLYMA_06G189900	GLYMA_03G123600	GLYMA_13G288000	GLYMA_11G124300	GLYMA_08G021700	GLYMA_07G032700	GLYMA_01G140100		GLYMA_01G239800		GLYMA_14G154200
GLYMA_13G082000	GLYMA_20G241800	GLYMA_19G082000	GLYMA_15G239700	GLYMA_09G092600	GLYMA_16G188700	GLYMA_09G150300	GLYMA_07G192300	GLYMA_17G198700	GLYMA_10G267700		GLYMA_13G082000		GLYMA_07G186700
GLYMA_20G232000	GLYMA_10G230200	GLYMA_07G192300	GLYMA_03G001600	GLYMA_13G057600	GLYMA_03G104800	GLYMA_14G197500	GLYMA_15G239600	GLYMA_15G134400	GLYMA_16G182700		GLYMA_20G232000		GLYMA_02G080700
GLYMA_06G179200	GLYMA_05G231600	GLYMA_10G154200	GLYMA_15G118500	GLYMA_09G190200	GLYMA_11G104200	GLYMA_18G012300	GLYMA_11G253200	GLYMA_01G074200	GLYMA_18G186900		GLYMA_06G179200		GLYMA_10G288400
GLYMA_08G314700	GLYMA_10G256100	GLYMA_11G085200	GLYMA_05G097200	GLYMA_06G116100	GLYMA_08G240100	GLYMA_14G055900	GLYMA_13G094100	GLYMA_14G018800	GLYMA_09G210400		GLYMA_08G314700		GLYMA_16G181600
ENSRNA050030472	GLYMA_03G139500	GLYMA_10G283000	GLYMA_07G205200	GLYMA_17G223400	GLYMA_02G094700	GLYMA_19G030700	GLYMA_12G008100	GLYMA_20G184200	GLYMA_17G126000		ENSRNA050030472		GLYMA_08G003400
GLYMA_09G170500	GLYMA_13G359700	GLYMA_13G214500	GLYMA_15G150100	GLYMA_18G245100	GLYMA_10G155300	GLYMA_03G171900	GLYMA_05G226000	GLYMA_08G279600	GLYMA_01G135200		GLYMA_09G170500		GLYMA_10G237800
GLYMA_02G265900	GLYMA_19G043000	GLYMA_13G294800	GLYMA_08G017300	GLYMA_19G035400	GLYMA_11G124200	GLYMA_10G006700	GLYMA_19G147700	GLYMA_14G203400	GLYMA_18G199300		GLYMA_02G265900		GLYMA_17G166900
GLYMA_03G139500	GLYMA_15G138400	GLYMA_01G125800	GLYMA_09G141800	GLYMA_19G111700	GLYMA_03G008100	GLYMA_08G366700	GLYMA_03G211700	GLYMA_18G286700	GLYMA_08G221600		GLYMA_03G139500		GLYMA_18G099500
GLYMA_07G218900	GLYMA_17G211900	GLYMA_19G033800	GLYMA_03G122900	GLYMA_19G250400	GLYMA_16G057400	GLYMA_03G007000	GLYMA_07G181400	GLYMA_12G196100	GLYMA_03G201300		GLYMA_07G218900		GLYMA_16G139400
GLYMA_14G155100	GLYMA_15G093000	GLYMA_19G147700	GLYMA_10G054200	GLYMA_18G012300	GLYMA_13G141200	GLYMA_07G224100	GLYMA_08G098900	GLYMA_13G056500	GLYMA_08G198800		GLYMA_14G155100		GLYMA_02G128000
GLYMA_18G295700	GLYMA_15G018700	GLYMA_12G105700	GLYMA_01G232000	GLYMA_15G271000	GLYMA_12G084000	GLYMA_08G353500	GLYMA_01G166300	GLYMA_09G263100	GLYMA_18G012300		GLYMA_18G295700		GLYMA_13G066600
GLYMA_08G319200	GLYMA_19G218300	GLYMA_03G168200	GLYMA_08G285400	GLYMA_20G039600	GLYMA_09G131500	GLYMA_12G108500	GLYMA_20G006600	GLYMA_06G022900	GLYMA_14G067700		GLYMA_08G319200		GLYMA_01G106100
GLYMA_01G209500	GLYMA_19G114600	GLYMA_19G030100	GLYMA_10G027600	GLYMA_01G190000	GLYMA_12G180200	GLYMA_13G331600	GLYMA_10G045500	GLYMA_10G206500	GLYMA_09G010700		GLYMA_01G209500		GLYMA_13G319100
GLYMA_05G042800	GLYMA_11G056600	GLYMA_18G012300	GLYMA_08G287500	GLYMA_20G135400	GLYMA_17G086500	GLYMA_10G247500	GLYMA_19G226000	GLYMA_05G037900	GLYMA_12G013100		GLYMA_05G042800		GLYMA_07G133800
GLYMA_17G210500	GLYMA_13G279800	GLYMA_18G216200	GLYMA_19G003400	GLYMA_09G008800	GLYMA_13G287600	GLYMA_03G221400	GLYMA_08G350000	GLYMA_06G166100	GLYMA_07G154200		GLYMA_17G210500		GLYMA_11G244900
GLYMA_18G076900	GLYMA_06G324200	GLYMA_18G071400	GLYMA_02G223200	GLYMA_17G166900	GLYMA_16G048000	GLYMA_17G131200	GLYMA_03G149300	GLYMA_05G248800	GLYMA_10G155300		GLYMA_18G076900		GLYMA_03G259200
GLYMA_13G130600	GLYMA_05G227900	GLYMA_07G141100	GLYMA_15G258600	GLYMA_05G215500	GLYMA_06G166500	GLYMA_06G137600	GLYMA_12G191000	GLYMA_12G008100	GLYMA_01G127200		GLYMA_13G130600		GLYMA_09G039000
GLYMA_14G052600	GLYMA_06G166500	GLYMA_15G134400	GLYMA_20G196200	GLYMA_07G201000	GLYMA_11G143800	GLYMA_05G049300	GLYMA_14G154200	GLYMA_13G053300	GLYMA_15G041100		GLYMA_14G052600		GLYMA_07G136500
GLYMA_04G048500	GLYMA_17G252500	GLYMA_02G089900	GLYMA_19G260900	GLYMA_15G005700	GLYMA_15G075300	GLYMA_02G252600	GLYMA_01G178300	GLYMA_15G002200	GLYMA_17G044700		GLYMA_04G048500		GLYMA_05G208700
GLYMA_02G094700	GLYMA_13G122400	GLYMA_19G260900	GLYMA_19G033800	GLYMA_13G358600	GLYMA_02G093200	GLYMA_01G136400	GLYMA_09G071300	GLYMA_02G203300	GLYMA_14G030700		GLYMA_02G094700		GLYMA_09G010800
GLYMA_17G211900	GLYMA_04G133400	GLYMA_02G093200	GLYMA_08G070900	GLYMA_01G225100	GLYMA_18G094300	GLYMA_14G207900	GLYMA_13G133200	GLYMA_10G045500	GLYMA_12G011400		GLYMA_17G211900		GLYMA_12G018900
GLYMA_18G071400	GLYMA_13G358600	GLYMA_19G140500	GLYMA_05G109600	GLYMA_07G096500	GLYMA_01G085200	GLYMA_15G211700	GLYMA_18G094300	GLYMA_16G128800	GLYMA_19G083900		GLYMA_18G071400		GLYMA_12G216300
GLYMA_10G007200	GLYMA_U044600	GLYMA_18G245100	GLYMA_05G066000	GLYMA_17G105400	GLYMA_20G196100	GLYMA_16G128800	GLYMA_04G060600	GLYMA_08G035900	GLYMA_12G216300		GLYMA_10G007200		GLYMA_01G125800
GLYMA_06G100500	GLYMA_02G109500	GLYMA_07G096500	GLYMA_05G075000	GLYMA_10G045500	GLYMA_18G103500	GLYMA_11G124200	GLYMA_17G015400	GLYMA_11G104200	GLYMA_03G017500		GLYMA_06G100500		GLYMA_03G123600
GLYMA_19G042900	GLYMA_04G019200	GLYMA_19G127200	GLYMA_13G257000	GLYMA_16G190600	GLYMA_05G013700	GLYMA_08G336300	GLYMA_10G206900	GLYMA_01G108200	GLYMA_17G248700		GLYMA_19G042900		GLYMA_14G115500
GLYMA_08G254600	GLYMA_14G048400	GLYMA_12G021800	GLYMA_15G207800	ENSRNA050001790	GLYMA_13G321200	GLYMA_04G198300	GLYMA_10G195200	GLYMA_20G132200	GLYMA_02G151900		GLYMA_08G254600		GLYMA_06G294500
GLYMA_17G107800	GLYMA_12G105700	GLYMA_10G067100	GLYMA_04G200500	GLYMA_13G353900	GLYMA_13G155100	GLYMA_08G021700	GLYMA_13G256600	GLYMA_01G229600	GLYMA_19G238400		GLYMA_17G107800		GLYMA_18G077900
GLYMA_19G247800	GLYMA_05G109600	GLYMA_11G074900	GLYMA_01G073600	GLYMA_19G195300	GLYMA_19G014500	GLYMA_14G094500	GLYMA_10G247600	GLYMA_02G046200	GLYMA_04G061400		GLYMA_19G247800		GLYMA_15G144700
GLYMA_15G018700	GLYMA_20G027000	GLYMA_13G133200	GLYMA_18G111800	GLYMA_11G253200	GLYMA_08G017700	GLYMA_20G217600	GLYMA_03G218800	GLYMA_03G204900	GLYMA_01G178300		GLYMA_15G018700		GLYMA_20G097100
GLYMA_18G042100	GLYMA_11G219400	GLYMA_03G208400	GLYMA_06G125300	GLYMA_20G041100	GLYMA_20G203500	GLYMA_15G058300	GLYMA_05G051400	GLYMA_13G031000	GLYMA_13G280500		GLYMA_18G042100		GLYMA_06G290300
GLYMA_20G224300	GLYMA_01G210500	GLYMA_05G013700	GLYMA_14G063300	GLYMA_19G199800	GLYMA_07G088000	GLYMA_12G011400	GLYMA_09G033700	GLYMA_15G058800	GLYMA_12G200000		GLYMA_20G224300		GLYMA_08G325200
GLYMA_12G049200	GLYMA_20G238300	GLYMA_16G188900	GLYMA_13G095300	GLYMA_11G232000	GLYMA_19G250400	GLYMA_17G123400	GLYMA_18G199300	GLYMA_08G039400	GLYMA_16G078900		GLYMA_12G049200		GLYMA_07G032300
GLYMA_18G057200	GLYMA_08G017300	GLYMA_U044100	GLYMA_12G120200	GLYMA_05G055400	GLYMA_03G216100	GLYMA_08G215900	GLYMA_19G142000	GLYMA_18G199300	GLYMA_04G023000		GLYMA_18G057200		GLYMA_10G211000
GLYMA_08G232300	GLYMA_16G109300	GLYMA_13G319100	GLYMA_06G010500	GLYMA_02G287400	GLYMA_04G221700	GLYMA_18G058000	GLYMA_01G190000	GLYMA_13G279800	GLYMA_01G025200		GLYMA_08G232300		GLYMA_20G241700
GLYMA_18G012900	GLYMA_05G161200	GLYMA_17G132800	GLYMA_07G250600	GLYMA_09G068700	GLYMA_01G239800	GLYMA_11G052200	GLYMA_10G154200	GLYMA_20G142100	GLYMA_13G089100		GLYMA_18G012900		GLYMA_06G000600
GLYMA_12G120200	GLYMA_19G260900	GLYMA_08G021700	GLYMA_08G035900	GLYMA_12G191000	GLYMA_09G278000	GLYMA_09G028400	GLYMA_03G071700	GLYMA_09G229200	GLYMA_14G068400		GLYMA_12G120200		GLYMA_01G071300
GLYMA_05G224300	GLYMA_08G199400	GLYMA_16G046300	GLYMA_15G228900	GLYMA_18G274200	GLYMA_02G203300	GLYMA_04G060600	GLYMA_18G085800	GLYMA_11G162500	GLYMA_17G224900		GLYMA_05G224300		GLYMA_18G216200
GLYMA_19G130300	GLYMA_18G012600	GLYMA_20G162200	GLYMA_05G160700	GLYMA_08G358600	GLYMA_06G026600	GLYMA_07G086700	GLYMA_12G152100	GLYMA_20G154500	GLYMA_03G138300		GLYMA_19G130300		GLYMA_19G258000
GLYMA_13G349300	GLYMA_11G012900	GLYMA_08G314700	GLYMA_07G255000	GLYMA_12G189000	GLYMA_03G252800	GLYMA_06G290300	GLYMA_15G239700	GLYMA_18G278100	GLYMA_03G046000		GLYMA_13G349300		GLYMA_19G159000
GLYMA_14G029800	GLYMA_07G076400	GLYMA_02G277600	GLYMA_02G140400	GLYMA_09G259600	GLYMA_09G038900	GLYMA_11G037300	GLYMA_18G225000	GLYMA_08G300300	GLYMA_04G223000		GLYMA_14G029800		GLYMA_10G230400
GLYMA_19G214500	GLYMA_01G020400	GLYMA_06G100500	GLYMA_17G216100	GLYMA_05G013700	GLYMA_07G032700	GLYMA_18G265200	GLYMA_02G022100	GLYMA_12G044700	GLYMA_06G017600		GLYMA_19G214500		GLYMA_07G207000
GLYMA_05G075000	GLYMA_16G046300	GLYMA_03G237700	GLYMA_02G056000	GLYMA_08G033100	GLYMA_15G249800	GLYMA_04G017800	GLYMA_19G114600	GLYMA_09G259600	GLYMA_01G129100		GLYMA_05G075000		GLYMA_04G025300
GLYMA_04G087500	GLYMA_15G005700	GLYMA_08G243100	GLYMA_17G103300	GLYMA_09G184000	GLYMA_13G147600	GLYMA_08G068400	GLYMA_16G063400	GLYMA_16G057400	GLYMA_07G076400		GLYMA_04G087500		GLYMA_14G037100
GLYMA_10G156600	GLYMA_17G198700	GLYMA_14G064000	GLYMA_06G160300	GLYMA_20G196200	GLYMA_09G236900	GLYMA_13G031500	GLYMA_12G084000	GLYMA_05G214900	GLYMA_17G210500		GLYMA_10G156600		GLYMA_16G165600
GLYMA_16G078400	GLYMA_14G014400	GLYMA_10G178100	GLYMA_19G032100	GLYMA_05G086600	GLYMA_09G138100	GLYMA_05G125000	GLYMA_02G126600	GLYMA_17G064500	GLYMA_14G113200		GLYMA_16G078400		GLYMA_19G147800
GLYMA_19G114600	GLYMA_19G231700	GLYMA_U044600	GLYMA_11G057800	GLYMA_01G108200	GLYMA_11G244800	GLYMA_13G038600	GLYMA_17G238200	GLYMA_11G044400	GLYMA_17G099000		GLYMA_19G114600		GLYMA_07G116700
GLYMA_08G243100	GLYMA_13G062500	GLYMA_03G139500	GLYMA_18G012200	GLYMA_02G051300	GLYMA_17G236500	GLYMA_08G358600	GLYMA_02G028200	GLYMA_18G037800	GLYMA_03G201800		GLYMA_08G243100		GLYMA_20G203500
GLYMA_19G082000	GLYMA_17G260300	GLYMA_12G116700	GLYMA_05G040300	GLYMA_04G091800	GLYMA_06G154500	GLYMA_02G219800	GLYMA_01G178800	GLYMA_19G127200	GLYMA_04G228900		GLYMA_19G082000		GLYMA_10G195700
GLYMA_18G205800	GLYMA_14G052000	GLYMA_15G061700	GLYMA_18G201500	GLYMA_17G224900	GLYMA_14G223000	GLYMA_05G008300	GLYMA_17G123400	GLYMA_20G196100	GLYMA_06G052800		GLYMA_18G205800		GLYMA_11G228000
GLYMA_02G292700	GLYMA_19G219800	GLYMA_18G077000	GLYMA_14G029800	GLYMA_10G189700	GLYMA_15G149600	GLYMA_12G063400	GLYMA_16G181900	GLYMA_07G031200	GLYMA_11G031900		GLYMA_02G292700		GLYMA_08G053700
GLYMA_17G252500	GLYMA_14G174600	GLYMA_20G241800	GLYMA_20G145300	GLYMA_09G273800	GLYMA_12G107600	GLYMA_01G137200	GLYMA_17G096500	GLYMA_14G207900	GLYMA_03G186900		GLYMA_17G252500		GLYMA_15G150100
GLYMA_05G027000	GLYMA_08G144500	GLYMA_13G056500	GLYMA_16G206300	GLYMA_08G068700	GLYMA_20G154500	GLYMA_13G206700	GLYMA_15G241700	GLYMA_17G131200	GLYMA_20G137900		GLYMA_05G027000		GLYMA_08G213100
GLYMA_04G238400	GLYMA_20G027900	GLYMA_18G147000	GLYMA_18G202900	GLYMA_20G234200	GLYMA_14G053900	GLYMA_09G092600	GLYMA_08G308300	GLYMA_09G131500	GLYMA_02G094700		GLYMA_04G238400		GLYMA_20G207200
GLYMA_09G022300	GLYMA_06G318200	GLYMA_13G057600	GLYMA_09G010700	GLYMA_03G217500	GLYMA_07G266600	GLYMA_04G140100	GLYMA_11G100600	GLYMA_18G222900	GLYMA_03G182300		GLYMA_09G022300		GLYMA_08G066800
GLYMA_16G076600	GLYMA_13G169700	GLYMA_13G321200	GLYMA_20G107500	GLYMA_02G277600	GLYMA_03G222300	GLYMA_08G062500	GLYMA_03G139500	GLYMA_05G109600	GLYMA_17G258400		GLYMA_16G076600		GLYMA_13G228900
GLYMA_17G044700	GLYMA_12G023800	GLYMA_03G132700	GLYMA_09G012400	GLYMA_06G101700	GLYMA_11G055300	GLYMA_16G133000	GLYMA_18G245100	GLYMA_09G092600	GLYMA_11G083800		GLYMA_17G044700		GLYMA_18G272200
GLYMA_18G053800	GLYMA_03G237700	GLYMA_02G154600	GLYMA_13G035600	GLYMA_08G325200	GLYMA_16G192400	GLYMA_12G049200	GLYMA_08G039400	GLYMA_12G015300	GLYMA_03G048600		GLYMA_18G053800		GLYMA_03G177300
GLYMA_04G060600	GLYMA_06G113300	GLYMA_07G186700	GLYMA_18G012800	GLYMA_07G132100	GLYMA_07G155200	GLYMA_15G221200	GLYMA_09G166600	GLYMA_06G113300	GLYMA_03G006800		GLYMA_04G060600		GLYMA_19G214100
GLYMA_13G304900	GLYMA_04G191200	GLYMA_10G247300	GLYMA_04G043000	GLYMA_13G044500	GLYMA_19G130300	GLYMA_07G141500	GLYMA_17G105400	GLYMA_19G159000	GLYMA_15G005700		GLYMA_13G304900		GLYMA_06G117800
GLYMA_01G195500	GLYMA_19G224500	GLYMA_07G205200	GLYMA_14G213100	GLYMA_10G154100	GLYMA_06G022900	GLYMA_06G072100	GLYMA_19G167200	GLYMA_18G077000	GLYMA_08G147600		GLYMA_01G195500		GLYMA_03G168200
GLYMA_19G032100	GLYMA_18G018400	GLYMA_11G124200	GLYMA_05G056600	GLYMA_09G225800	GLYMA_18G271300	GLYMA_04G238400	GLYMA_20G045800	GLYMA_10G099800	GLYMA_16G017400		GLYMA_19G032100		GLYMA_11G253200
GLYMA_19G147700	GLYMA_05G007600	GLYMA_10G043800	GLYMA_12G143800	GLYMA_08G230700	GLYMA_20G239900	GLYMA_19G171000	GLYMA_13G255000	GLYMA_13G283900	GLYMA_12G199600		GLYMA_19G147700		GLYMA_20G045800
GLYMA_13G279800	GLYMA_05G008300	GLYMA_07G132100	GLYMA_16G165700	GLYMA_01G230000	GLYMA_13G143700	GLYMA_17G223400	GLYMA_12G234500	GLYMA_06G000600	GLYMA_03G010200		GLYMA_13G279800		GLYMA_13G233900
GLYMA_04G133500	GLYMA_03G144700	GLYMA_12G132800	GLYMA_02G168100	GLYMA_03G138900	GLYMA_18G099500	GLYMA_04G191200	GLYMA_09G022400	GLYMA_15G273700	GLYMA_13G206700		GLYMA_04G133500		GLYMA_09G008800
GLYMA_08G100400	GLYMA_13G046600	GLYMA_08G358600	GLYMA_20G216000	GLYMA_11G233500	GLYMA_07G201000	GLYMA_02G143200	GLYMA_08G243100	GLYMA_11G059900	GLYMA_02G261900		GLYMA_08G100400		GLYMA_06G049500
GLYMA_14G087800	GLYMA_17G031200	GLYMA_01G210500	GLYMA_13G057600	GLYMA_18G037800	GLYMA_06G113500	GLYMA_17G211900	GLYMA_13G114200	GLYMA_09G128600	GLYMA_20G203500		GLYMA_14G087800		GLYMA_09G138100
GLYMA_13G365900	GLYMA_12G097800	GLYMA_20G147200	GLYMA_02G177700	GLYMA_10G178100	GLYMA_07G069500	GLYMA_12G152100	GLYMA_09G012200	GLYMA_20G234200	GLYMA_08G230700		GLYMA_13G365900		GLYMA_03G062500
GLYMA_13G306600	GLYMA_03G211700	GLYMA_09G247700	GLYMA_08G142100	GLYMA_13G061800	GLYMA_11G238800	GLYMA_19G226000	GLYMA_12G116700	GLYMA_06G100500	GLYMA_15G032500		GLYMA_13G306600		GLYMA_12G004600
GLYMA_10G159300	GLYMA_11G030800	GLYMA_14G094500	GLYMA_02G181600	GLYMA_02G045900	GLYMA_11G168000	GLYMA_01G125800	GLYMA_01G124500	GLYMA_17G223400	GLYMA_04G113500		GLYMA_10G159300		GLYMA_13G310700
GLYMA_04G003200	GLYMA_07G132100	GLYMA_01G078600	GLYMA_14G078900	GLYMA_13G133200	GLYMA_04G205100	GLYMA_02G060800	GLYMA_16G179100	GLYMA_15G201700	GLYMA_04G109500		GLYMA_04G003200		GLYMA_15G146800
GLYMA_13G040100	GLYMA_09G278200	GLYMA_08G229100	GLYMA_04G079100	GLYMA_06G077500	GLYMA_03G062500	GLYMA_15G134400	GLYMA_04G026700	GLYMA_08G021700	GLYMA_18G127400		GLYMA_13G040100		GLYMA_14G007000
GLYMA_02G034500	GLYMA_14G155100	GLYMA_05G241300	GLYMA_08G168900	GLYMA_01G166300	GLYMA_08G180500	GLYMA_18G251100	GLYMA_17G013400	GLYMA_04G071600	GLYMA_06G037900		GLYMA_02G034500		GLYMA_11G247400
GLYMA_15G024200	GLYMA_19G030100	GLYMA_05G004800	GLYMA_06G067000	GLYMA_09G202000	GLYMA_20G229000	GLYMA_02G035700	GLYMA_02G143200	GLYMA_01G031300	GLYMA_15G058300		GLYMA_15G024200		GLYMA_08G332900
GLYMA_12G011500	GLYMA_14G221500	GLYMA_06G096200	GLYMA_17G248300	GLYMA_09G136400	GLYMA_07G256900	GLYMA_20G232700	GLYMA_10G099800	GLYMA_20G104600	GLYMA_09G055600		GLYMA_12G011500		GLYMA_08G227700
GLYMA_14G034000	GLYMA_17G042800	GLYMA_15G138400	GLYMA_20G063100	GLYMA_14G064600	GLYMA_15G144700	GLYMA_12G226500	GLYMA_15G134400	GLYMA_06G067000	GLYMA_20G196200		GLYMA_14G034000		GLYMA_14G194300
GLYMA_02G218000	GLYMA_19G037600	GLYMA_10G160800	ENSRNA050030397	GLYMA_15G097400	GLYMA_03G186900	GLYMA_07G159700	GLYMA_19G144400	GLYMA_04G013400	GLYMA_03G211700		GLYMA_02G218000		GLYMA_04G022100
GLYMA_19G127200	GLYMA_06G015700	GLYMA_15G172000	GLYMA_07G138200	GLYMA_12G018900	GLYMA_05G140700	GLYMA_09G177800	GLYMA_03G217800	GLYMA_17G123400	GLYMA_06G309200		GLYMA_19G127200		GLYMA_12G015300
GLYMA_09G028400	GLYMA_19G001400	GLYMA_18G257900	GLYMA_09G263100	GLYMA_19G203500	GLYMA_20G033900	GLYMA_10G189700	GLYMA_01G085200	GLYMA_08G053700	GLYMA_17G066100		GLYMA_09G028400		GLYMA_20G234100
GLYMA_05G049900	GLYMA_14G154200	GLYMA_09G132200	GLYMA_20G049800	GLYMA_06G321600	GLYMA_16G113000	GLYMA_02G196100	GLYMA_19G030100	GLYMA_01G125800	GLYMA_18G224700		GLYMA_05G049900		GLYMA_08G132700
GLYMA_20G216000	GLYMA_08G045000	GLYMA_13G279800	GLYMA_06G019100	GLYMA_07G259400	GLYMA_07G133700	GLYMA_15G273700	GLYMA_14G064000	GLYMA_18G205800	GLYMA_03G208400		GLYMA_20G216000		GLYMA_04G079100
GLYMA_10G229800	GLYMA_14G029800	GLYMA_01G021200	GLYMA_08G042000	GLYMA_20G131100	GLYMA_15G024600	GLYMA_02G048700	GLYMA_09G247700	GLYMA_14G011700	GLYMA_18G029400		GLYMA_10G229800		GLYMA_14G223000
GLYMA_18G286700	GLYMA_10G081900	GLYMA_18G199300	GLYMA_10G046800	GLYMA_12G055200	GLYMA_13G119000	GLYMA_06G093600	GLYMA_11G074900	GLYMA_06G163200	GLYMA_14G056300		GLYMA_18G286700		GLYMA_08G079100
GLYMA_03G218800	GLYMA_11G169600	GLYMA_06G290300	GLYMA_15G024300	GLYMA_19G167200	GLYMA_03G145500	GLYMA_03G123600	GLYMA_07G069500	GLYMA_05G072200	GLYMA_01G209500		GLYMA_03G218800		GLYMA_14G047200
GLYMA_03G062800	GLYMA_08G028800	GLYMA_02G259800	GLYMA_13G255000	GLYMA_03G217800	GLYMA_11G253900	GLYMA_20G050500	GLYMA_13G283900	GLYMA_14G087800	GLYMA_10G228000		GLYMA_03G062800		GLYMA_15G069900
GLYMA_19G199800	GLYMA_04G179500	GLYMA_19G026000	GLYMA_20G033900	GLYMA_15G113200	GLYMA_02G259800	GLYMA_15G061700	GLYMA_07G042900	GLYMA_18G082000	GLYMA_01G224800		GLYMA_19G199800		GLYMA_16G141500
GLYMA_19G120600	GLYMA_18G183100	GLYMA_13G219200	GLYMA_14G052600	GLYMA_03G217700	GLYMA_03G083700	GLYMA_11G068700	GLYMA_13G061800	GLYMA_03G017500	GLYMA_08G191900		GLYMA_19G120600		GLYMA_03G163100
GLYMA_13G084000	GLYMA_18G263700	GLYMA_17G123400	GLYMA_02G199300	GLYMA_19G214500	GLYMA_14G055900	GLYMA_09G132200	GLYMA_10G241600	GLYMA_20G057500	GLYMA_08G197700		GLYMA_13G084000		GLYMA_14G096700
GLYMA_19G171900	GLYMA_04G184500	GLYMA_13G084000	GLYMA_14G029900	GLYMA_08G227400	GLYMA_16G017400	GLYMA_12G218000	GLYMA_13G349300	GLYMA_19G167200	GLYMA_06G189900		GLYMA_19G171900		GLYMA_11G092600
GLYMA_13G350400	GLYMA_01G186700	GLYMA_17G011800	GLYMA_12G122600	GLYMA_12G116700	GLYMA_10G063100	GLYMA_19G111700	GLYMA_10G241100	GLYMA_18G152400	GLYMA_18G267900		GLYMA_13G350400		GLYMA_07G132100
GLYMA_17G238200	GLYMA_02G285000	GLYMA_13G191900	GLYMA_08G038500	GLYMA_13G310700	GLYMA_13G087800	GLYMA_07G009900	GLYMA_06G058800	GLYMA_18G147000	GLYMA_17G107800		GLYMA_17G238200		GLYMA_11G233500
GLYMA_16G057400	GLYMA_15G005600	GLYMA_15G124000	GLYMA_19G247800	GLYMA_15G239200	GLYMA_01G232400	GLYMA_10G031200	GLYMA_03G144700	GLYMA_06G202200	GLYMA_03G096600		GLYMA_16G057400		GLYMA_13G281600
GLYMA_07G009900	GLYMA_13G237100	GLYMA_07G159700	GLYMA_05G003000	GLYMA_08G200000	GLYMA_13G123100	GLYMA_17G064500	GLYMA_04G246600	GLYMA_09G061300	GLYMA_10G295300		GLYMA_07G009900		GLYMA_20G150600
GLYMA_08G109400	GLYMA_05G161100	GLYMA_04G010600	GLYMA_06G026600	GLYMA_11G052200	GLYMA_03G006800	GLYMA_10G178100	GLYMA_14G097000	GLYMA_10G229800	GLYMA_07G031200		GLYMA_08G109400		GLYMA_12G171100
GLYMA_09G256100	GLYMA_12G013100	GLYMA_17G096500	GLYMA_13G349300	GLYMA_12G121200	GLYMA_16G152600	GLYMA_17G051100	GLYMA_11G124300	GLYMA_07G205200	GLYMA_11G129600		GLYMA_09G256100		GLYMA_09G039800
GLYMA_17G223400	GLYMA_14G051900	GLYMA_14G097000	GLYMA_15G146800	GLYMA_05G195900	GLYMA_06G067000	GLYMA_07G186700	GLYMA_15G148300	GLYMA_11G238800	GLYMA_04G246600		GLYMA_17G223400		GLYMA_16G023500
GLYMA_15G124000	GLYMA_09G170500	GLYMA_08G350000	GLYMA_13G093600	GLYMA_01G095500	GLYMA_12G004600	GLYMA_19G235300	ENSRNA049760259	GLYMA_10G103100	GLYMA_04G225400		GLYMA_15G124000		GLYMA_14G067000
GLYMA_10G103100	GLYMA_12G063400	GLYMA_14G078900	GLYMA_08G356800	GLYMA_14G067400	GLYMA_06G256500	GLYMA_04G152100	GLYMA_12G120200	GLYMA_12G004700	GLYMA_20G138500		GLYMA_10G103100		GLYMA_16G188900
GLYMA_03G237700	GLYMA_06G116100	GLYMA_14G106600	GLYMA_18G278100	GLYMA_20G196100	GLYMA_07G116800	GLYMA_09G068700	GLYMA_12G202700	GLYMA_02G043200	GLYMA_08G109400		GLYMA_03G237700		GLYMA_05G085400
GLYMA_07G141500	GLYMA_06G163200	GLYMA_20G006600	GLYMA_13G299000	GLYMA_08G243100	GLYMA_19G251500	GLYMA_11G037200	GLYMA_09G166300	GLYMA_10G154200	GLYMA_08G199400		GLYMA_07G141500		GLYMA_11G022100
GLYMA_08G221600	GLYMA_10G152300	GLYMA_07G260600	GLYMA_01G108200	GLYMA_10G031200	GLYMA_15G229400	GLYMA_11G186500	GLYMA_17G054500	GLYMA_20G217600	GLYMA_07G215700		GLYMA_08G221600		GLYMA_04G132700
GLYMA_02G092500	GLYMA_07G086700	GLYMA_12G211400	GLYMA_17G046000	GLYMA_19G082000	GLYMA_06G169700	GLYMA_20G196100	GLYMA_15G124000	GLYMA_11G253200	GLYMA_17G048600		GLYMA_02G092500		GLYMA_08G251900
GLYMA_11G037200	GLYMA_12G011500	GLYMA_03G218800	GLYMA_04G048500	GLYMA_08G216200	GLYMA_13G250900	GLYMA_02G080700	GLYMA_18G023500	GLYMA_13G133200	GLYMA_02G202200		GLYMA_11G037200		GLYMA_13G114200
GLYMA_18G030700	GLYMA_06G072800	GLYMA_03G116200	GLYMA_20G196100	GLYMA_13G196200	GLYMA_01G129700	GLYMA_08G314700	GLYMA_13G117400	GLYMA_02G259800	GLYMA_16G214100		GLYMA_18G030700		GLYMA_06G270400
GLYMA_18G267800	GLYMA_06G096200	GLYMA_12G197600	GLYMA_17G157400	GLYMA_02G261400	GLYMA_12G202700	GLYMA_10G182800	GLYMA_01G225100	GLYMA_08G197800	GLYMA_06G113500		GLYMA_18G267800		GLYMA_10G090000
GLYMA_16G181900	GLYMA_03G071700	GLYMA_18G286700	GLYMA_14G194300	GLYMA_15G276000	GLYMA_19G222500	GLYMA_13G279800	GLYMA_06G296300	GLYMA_09G237000	GLYMA_13G259500		GLYMA_16G181900		GLYMA_04G030400
GLYMA_06G237400	GLYMA_13G088300	GLYMA_05G072200	GLYMA_18G216200	GLYMA_03G069200	GLYMA_15G002200	GLYMA_06G315200	GLYMA_08G056700	GLYMA_12G121200	GLYMA_19G104200		GLYMA_06G237400		GLYMA_07G260600
GLYMA_02G195900	GLYMA_08G205600	GLYMA_03G153600	GLYMA_05G044000	GLYMA_16G148600	GLYMA_02G080700	GLYMA_20G216000	GLYMA_11G216700	GLYMA_05G049300	GLYMA_06G317800		GLYMA_02G195900		GLYMA_06G142200
GLYMA_04G255500	GLYMA_03G218800	GLYMA_09G200800	GLYMA_09G008800	GLYMA_13G299800	GLYMA_06G196600	GLYMA_20G232000	GLYMA_03G168200	GLYMA_02G069700	GLYMA_20G232700		GLYMA_04G255500		GLYMA_11G251800
ENSRNA050002085	GLYMA_06G189900	GLYMA_16G206300	GLYMA_06G163200	GLYMA_20G241800	GLYMA_04G165900	GLYMA_16G001200	GLYMA_06G107600	GLYMA_08G003400	GLYMA_15G057700		ENSRNA050002085		GLYMA_16G152600
GLYMA_06G058800	GLYMA_11G073100	GLYMA_11G193300	GLYMA_19G027400	GLYMA_19G184900	GLYMA_02G128000	GLYMA_11G202800	GLYMA_15G061700	GLYMA_05G008300	GLYMA_18G057800		GLYMA_06G058800		GLYMA_20G231800
GLYMA_19G213500	GLYMA_13G307000	GLYMA_12G137000	GLYMA_11G037800	GLYMA_20G137900	GLYMA_17G210500	GLYMA_20G207200	GLYMA_18G236700	GLYMA_20G015900	GLYMA_04G227500		GLYMA_19G213500		GLYMA_07G256900
GLYMA_08G279600	GLYMA_08G289300	GLYMA_10G090000	GLYMA_07G255100	GLYMA_20G074700	GLYMA_06G294500	GLYMA_04G071600	GLYMA_08G106400	GLYMA_08G336300	GLYMA_18G099500		GLYMA_08G279600		GLYMA_15G005000
GLYMA_01G229600	GLYMA_14G025500	GLYMA_10G159300	GLYMA_12G011500	GLYMA_12G019500	GLYMA_04G239500	GLYMA_05G086600	GLYMA_03G163100	GLYMA_02G241800	GLYMA_05G226000		GLYMA_01G229600		GLYMA_04G173200
GLYMA_02G130900	GLYMA_19G082000	GLYMA_13G114200	GLYMA_16G120500	GLYMA_17G013400	GLYMA_10G229800	GLYMA_08G279600	GLYMA_08G028800	GLYMA_18G009900	GLYMA_14G018800		GLYMA_02G130900		GLYMA_07G139600
GLYMA_11G162500	GLYMA_15G002200	GLYMA_13G310700	GLYMA_13G350000	GLYMA_11G092600	GLYMA_05G045600	GLYMA_08G325200	GLYMA_14G220600	GLYMA_03G035600	GLYMA_17G224600		GLYMA_11G162500		GLYMA_15G276000
GLYMA_12G100600	GLYMA_13G035600	GLYMA_11G238800	GLYMA_13G196200	GLYMA_07G069500	GLYMA_06G027200	GLYMA_08G168400	GLYMA_15G189700	GLYMA_19G235400	GLYMA_11G012900		GLYMA_12G100600		GLYMA_09G155700
GLYMA_02G143200	GLYMA_17G131200	GLYMA_17G065400	GLYMA_13G132900	GLYMA_19G234100	GLYMA_02G035700	GLYMA_19G082000	GLYMA_09G025500	GLYMA_13G255000	GLYMA_20G061300		GLYMA_02G143200		GLYMA_16G126400
GLYMA_08G198900	GLYMA_09G043900	GLYMA_02G126100	GLYMA_15G079300	GLYMA_07G229200	GLYMA_09G118800	GLYMA_17G233200	GLYMA_08G132700	GLYMA_18G265200	GLYMA_16G169300		GLYMA_08G198900		GLYMA_13G368700
GLYMA_04G058500	GLYMA_02G199300	GLYMA_15G114700	GLYMA_12G053800	GLYMA_02G252600	GLYMA_18G141900	GLYMA_17G229000	GLYMA_11G244900	GLYMA_12G021800	GLYMA_15G149600		GLYMA_04G058500		GLYMA_10G138800
GLYMA_12G202700	GLYMA_03G247000	GLYMA_16G034300	GLYMA_17G044700	GLYMA_03G197300	GLYMA_13G051000	GLYMA_08G309700	GLYMA_04G133500	GLYMA_16G165600	GLYMA_19G219500		GLYMA_12G202700		GLYMA_06G318200
GLYMA_17G123400	GLYMA_08G195100	GLYMA_20G176600	GLYMA_08G011700	GLYMA_11G202800	GLYMA_04G191200	GLYMA_12G234500	GLYMA_02G048700	GLYMA_12G191000	GLYMA_02G092500		GLYMA_17G123400		GLYMA_18G103500
GLYMA_20G107500	GLYMA_11G146600	GLYMA_10G189700	GLYMA_01G042600	GLYMA_03G162600	GLYMA_12G096900	GLYMA_13G306300	GLYMA_13G053300	GLYMA_17G252500	GLYMA_13G050700		GLYMA_20G107500		GLYMA_04G238600
GLYMA_18G267900	GLYMA_19G035400	GLYMA_15G249800	GLYMA_18G301400	GLYMA_11G252800	GLYMA_03G057100	GLYMA_02G069700	GLYMA_12G018900	GLYMA_20G130200	GLYMA_12G152100		GLYMA_18G267900		GLYMA_09G032100
GLYMA_03G217700	GLYMA_07G010000	GLYMA_04G071600	GLYMA_11G098400	GLYMA_01G020400	GLYMA_04G137600	GLYMA_04G169400	GLYMA_08G336300	GLYMA_13G321200	GLYMA_02G063600		GLYMA_03G217700		GLYMA_11G008300
GLYMA_16G053000	GLYMA_13G306200	GLYMA_19G037600	GLYMA_03G062800	GLYMA_02G265900	GLYMA_08G168400	GLYMA_13G176500	GLYMA_13G304900	GLYMA_05G055400	GLYMA_09G255000		GLYMA_16G053000		GLYMA_08G210200
GLYMA_05G215500	GLYMA_04G246600	GLYMA_03G216100	GLYMA_04G225400	GLYMA_08G353500	GLYMA_01G243200	GLYMA_15G144100	GLYMA_12G055200	GLYMA_06G026600	GLYMA_04G079100		GLYMA_05G215500		GLYMA_17G050900
GLYMA_09G010700	GLYMA_03G206000	GLYMA_13G196200	GLYMA_06G270100	GLYMA_03G166000	GLYMA_19G082000	GLYMA_12G116700	GLYMA_10G090000	GLYMA_10G154100	GLYMA_18G254700		GLYMA_09G010700		GLYMA_17G127200
GLYMA_04G108400	GLYMA_14G115500	GLYMA_08G204900	GLYMA_18G199300	GLYMA_14G134900	GLYMA_19G219500	GLYMA_12G216400	GLYMA_11G037200	GLYMA_02G063400	GLYMA_03G176300		GLYMA_04G108400		GLYMA_10G243800
GLYMA_10G098400	GLYMA_16G063400	GLYMA_08G221600	GLYMA_20G017800	GLYMA_19G214100	GLYMA_18G152400	GLYMA_08G227700	GLYMA_06G052800	GLYMA_04G060600	GLYMA_01G221600		GLYMA_10G098400		GLYMA_09G204100
GLYMA_09G131500	GLYMA_16G177000	GLYMA_19G111700	GLYMA_02G140300	GLYMA_02G218000	GLYMA_04G030400	GLYMA_12G013100	GLYMA_07G009900	GLYMA_16G151200	GLYMA_08G011700		GLYMA_09G131500		GLYMA_18G010500
GLYMA_18G012300	GLYMA_10G132500	GLYMA_01G061900	GLYMA_09G094400	GLYMA_20G207200	GLYMA_07G141500	GLYMA_07G084200	GLYMA_09G132200	GLYMA_01G021200	GLYMA_05G055300		GLYMA_18G012300		GLYMA_04G098800
GLYMA_19G027400	GLYMA_02G040200	GLYMA_05G048400	GLYMA_05G148400	GLYMA_04G028600	GLYMA_15G024200	GLYMA_01G150100	GLYMA_10G004700	GLYMA_U044600	GLYMA_01G168500		GLYMA_19G027400		GLYMA_16G216800
GLYMA_15G164200	GLYMA_08G000800	GLYMA_02G048700	GLYMA_20G247900	GLYMA_13G321200	GLYMA_18G222900	GLYMA_09G071300	GLYMA_18G037800	GLYMA_19G082000	GLYMA_06G026600		GLYMA_15G164200		GLYMA_10G138200
GLYMA_20G217600	GLYMA_08G164300	GLYMA_18G076900	GLYMA_13G299800	GLYMA_17G241300	GLYMA_02G185100	GLYMA_10G109500	GLYMA_14G101800	GLYMA_02G048700	GLYMA_16G165600		GLYMA_20G217600		GLYMA_06G105200
GLYMA_01G217400	GLYMA_01G205300	GLYMA_11G252800	GLYMA_07G244400	GLYMA_15G149600	GLYMA_16G155100	GLYMA_07G181300	GLYMA_20G234200	GLYMA_20G162200	GLYMA_12G195900		GLYMA_01G217400		GLYMA_18G074100
GLYMA_15G014500	GLYMA_19G076600	GLYMA_09G025500	GLYMA_08G229900	GLYMA_18G023500	GLYMA_08G239400	GLYMA_07G125100	GLYMA_07G096500	GLYMA_17G013400	GLYMA_05G056300		GLYMA_15G014500		GLYMA_03G237800
GLYMA_06G093600	GLYMA_13G250900	GLYMA_16G025300	GLYMA_06G237400	GLYMA_11G130900	GLYMA_18G278100	GLYMA_02G132700	GLYMA_12G117100	GLYMA_15G136700	GLYMA_19G147700		GLYMA_06G093600		GLYMA_10G152000
GLYMA_12G049300	GLYMA_13G048100	GLYMA_06G022900	GLYMA_06G068800	GLYMA_20G006200	GLYMA_14G176300	GLYMA_15G211600	GLYMA_19G260900	GLYMA_07G159700	GLYMA_05G226100		GLYMA_12G049300		GLYMA_03G193300
GLYMA_03G187000	GLYMA_14G181500	GLYMA_06G088700	GLYMA_07G248100	GLYMA_13G341800	GLYMA_08G198900	GLYMA_13G056500	GLYMA_13G184100	GLYMA_07G218900	GLYMA_12G051800		GLYMA_03G187000		GLYMA_11G044700
GLYMA_13G255000	GLYMA_05G196000	GLYMA_20G224300	GLYMA_11G185100	GLYMA_06G325500	GLYMA_16G206300	GLYMA_02G277600	GLYMA_08G062500	GLYMA_15G061700	GLYMA_20G149500		GLYMA_13G255000		GLYMA_20G203000
GLYMA_09G136400	GLYMA_13G176500	GLYMA_18G205800	GLYMA_12G163400	GLYMA_10G081900	GLYMA_10G099800	GLYMA_19G096600	GLYMA_10G031200	GLYMA_13G031500	GLYMA_08G042000		GLYMA_09G136400		GLYMA_13G293700
GLYMA_02G007400	GLYMA_03G187200	GLYMA_04G252700	GLYMA_13G365900	GLYMA_02G300100	GLYMA_05G051400	GLYMA_11G020800	GLYMA_02G277600	GLYMA_07G088000	GLYMA_20G176600		GLYMA_02G007400		GLYMA_13G257200
GLYMA_08G056700	GLYMA_16G148600	GLYMA_12G196900	GLYMA_13G087800	GLYMA_12G202700	GLYMA_01G071300	GLYMA_04G205100	GLYMA_19G159300	GLYMA_12G152100	GLYMA_02G242900		GLYMA_08G056700		GLYMA_05G228100
GLYMA_09G166300	GLYMA_05G001500	GLYMA_08G106400	GLYMA_03G187000	GLYMA_19G055400	GLYMA_03G221400	GLYMA_15G124000	GLYMA_06G026600	GLYMA_18G295700	GLYMA_20G120100		GLYMA_09G166300		GLYMA_11G033900
GLYMA_03G035600	GLYMA_17G065100	GLYMA_12G152100	GLYMA_09G170500	GLYMA_01G198700	GLYMA_08G039400	GLYMA_11G130900	GLYMA_06G112700	GLYMA_11G012900	GLYMA_18G009800		GLYMA_03G035600		GLYMA_13G255800
GLYMA_19G226000	GLYMA_13G191900	GLYMA_14G087800	GLYMA_05G055300	GLYMA_16G181900	GLYMA_06G163200	GLYMA_14G064600	GLYMA_17G029700	GLYMA_14G055900	GLYMA_04G048500		GLYMA_19G226000		GLYMA_13G119000
GLYMA_05G179600	GLYMA_16G133000	GLYMA_12G004700	GLYMA_03G063000	GLYMA_17G238200	GLYMA_09G039800	GLYMA_03G166000	GLYMA_08G325200	GLYMA_13G057600	GLYMA_20G163500		GLYMA_05G179600		GLYMA_13G108500
GLYMA_07G084200	GLYMA_02G008700	GLYMA_19G144400	GLYMA_19G168700	GLYMA_12G105700	GLYMA_06G324200	GLYMA_13G133200	GLYMA_09G022300	GLYMA_07G009900	GLYMA_12G084000		GLYMA_07G084200		GLYMA_16G017700
GLYMA_03G162600	GLYMA_08G213100	GLYMA_19G167200	GLYMA_02G148300	GLYMA_19G226000	GLYMA_02G157300	GLYMA_18G009900	GLYMA_20G234100	GLYMA_01G071300	GLYMA_09G063900		GLYMA_03G162600		GLYMA_10G067100
GLYMA_10G241700	GLYMA_08G036200	GLYMA_09G136400	GLYMA_13G101500	GLYMA_16G046300	GLYMA_03G177300	GLYMA_17G166900	GLYMA_03G217700	GLYMA_06G301200	GLYMA_19G030100		GLYMA_10G241700		GLYMA_01G098700
GLYMA_19G218300	GLYMA_06G296300	GLYMA_12G064200	GLYMA_17G009900	GLYMA_19G159200	GLYMA_14G200700	GLYMA_14G097000	GLYMA_07G242700	GLYMA_14G067000	GLYMA_06G143700		GLYMA_19G218300		GLYMA_19G219500
GLYMA_15G149600	GLYMA_14G067700	GLYMA_06G289900	GLYMA_14G067700	GLYMA_06G237400	GLYMA_15G057700	GLYMA_03G201800	GLYMA_20G162200	GLYMA_10G063100	GLYMA_07G226500		GLYMA_15G149600		GLYMA_09G239100
GLYMA_18G277500	GLYMA_U045500	GLYMA_01G239800	GLYMA_19G111700	GLYMA_14G097000	GLYMA_11G244900	GLYMA_11G253200	GLYMA_15G222200	GLYMA_09G170500	GLYMA_14G094500		GLYMA_18G277500		GLYMA_17G060100
GLYMA_19G043000	GLYMA_01G225100	GLYMA_19G171900	GLYMA_18G014500	GLYMA_13G117400	GLYMA_13G066600	GLYMA_09G008800	GLYMA_08G115400	GLYMA_12G116700	GLYMA_15G024200		GLYMA_19G043000		GLYMA_02G202500
GLYMA_09G278000	GLYMA_03G001600	GLYMA_14G016800	GLYMA_01G124500	GLYMA_18G108700	GLYMA_14G213100	GLYMA_18G245100	GLYMA_15G138400	GLYMA_03G129200	GLYMA_09G021100		GLYMA_09G278000		GLYMA_01G230900
GLYMA_03G041200	GLYMA_13G345100	GLYMA_07G125100	GLYMA_19G243100	GLYMA_15G131000	GLYMA_14G181500	GLYMA_03G153600	GLYMA_10G154100	GLYMA_14G034000	GLYMA_19G114600		GLYMA_03G041200		GLYMA_15G118500
GLYMA_15G198800	GLYMA_02G060900	GLYMA_16G192400	GLYMA_07G056100	GLYMA_15G228900	GLYMA_14G096700	GLYMA_08G003400	GLYMA_14G037100	GLYMA_09G247700	GLYMA_14G042100		GLYMA_15G198800		GLYMA_06G067000
GLYMA_20G232700	GLYMA_06G010500	GLYMA_15G276000	GLYMA_13G328700	GLYMA_11G219600	GLYMA_01G135200	GLYMA_02G259800	ENSRNA050030429	GLYMA_09G136400	GLYMA_01G124700		GLYMA_20G232700		GLYMA_17G212200
GLYMA_12G223500	GLYMA_17G051100	GLYMA_03G157600	GLYMA_02G157300	GLYMA_05G051400	GLYMA_02G176100	GLYMA_03G062800	GLYMA_13G057600	GLYMA_13G345400	GLYMA_11G124200		GLYMA_12G223500		GLYMA_13G138600
GLYMA_10G026100	GLYMA_08G269300	GLYMA_02G035700	GLYMA_02G056600	GLYMA_18G085800	GLYMA_16G188800	GLYMA_18G193300	GLYMA_10G218900	GLYMA_13G350300	GLYMA_02G080700		GLYMA_10G026100		GLYMA_11G057800
ENSRNA050000665	GLYMA_13G056500	GLYMA_12G191000	GLYMA_06G061200	GLYMA_14G037100	GLYMA_13G099100	GLYMA_15G276000	GLYMA_13G310700	GLYMA_06G166500	GLYMA_04G071600		ENSRNA050000665		GLYMA_08G180500
GLYMA_14G091000	GLYMA_07G101000	GLYMA_03G166000	GLYMA_15G127900	GLYMA_04G191200	GLYMA_18G078000	GLYMA_03G116200	GLYMA_12G015300	GLYMA_10G189700	GLYMA_02G093200		GLYMA_14G091000		GLYMA_13G303000
GLYMA_14G156800	GLYMA_15G131000	GLYMA_05G196000	GLYMA_20G165100	GLYMA_17G123400	GLYMA_02G148200	GLYMA_10G090000	GLYMA_13G202100	GLYMA_06G169700	GLYMA_16G048000		GLYMA_14G156800		GLYMA_09G216600
GLYMA_08G033000	GLYMA_07G141500	GLYMA_08G356600	GLYMA_17G252500	GLYMA_08G022100	GLYMA_10G230400	GLYMA_15G172000	GLYMA_07G186700	GLYMA_04G205100	GLYMA_18G187100		GLYMA_08G033000		GLYMA_18G165000
GLYMA_06G137600	GLYMA_08G358400	GLYMA_02G022100	GLYMA_18G205800	GLYMA_02G185400	GLYMA_04G091300	GLYMA_07G069500	GLYMA_12G021800	GLYMA_10G195200	GLYMA_15G071200		GLYMA_06G137600		GLYMA_03G104700
GLYMA_10G218900	GLYMA_01G125800	GLYMA_18G265200	GLYMA_12G216300	GLYMA_10G229800	GLYMA_20G241800	GLYMA_19G120600	GLYMA_18G009900	GLYMA_14G007900	GLYMA_01G230000		GLYMA_10G218900		GLYMA_10G227700
GLYMA_16G151200	GLYMA_06G187100	GLYMA_17G099000	GLYMA_20G206600	GLYMA_07G266700	GLYMA_03G017500	GLYMA_11G095700	GLYMA_09G092600	GLYMA_01G137200	GLYMA_12G049300		GLYMA_16G151200		GLYMA_19G195300
GLYMA_20G241800	GLYMA_01G137200	GLYMA_05G109600	GLYMA_02G195900	GLYMA_06G264700	GLYMA_06G240400	GLYMA_12G044800	GLYMA_06G072100	GLYMA_07G256900	GLYMA_08G114400		GLYMA_20G241800		GLYMA_05G241900
GLYMA_13G088300	GLYMA_08G315000	GLYMA_07G229200	GLYMA_20G144300	GLYMA_11G095700	GLYMA_03G156700	GLYMA_09G136400	GLYMA_03G069200	GLYMA_18G225100	GLYMA_18G077900		GLYMA_13G088300		GLYMA_08G180900
GLYMA_12G021800	GLYMA_15G011000	GLYMA_14G055900	GLYMA_04G207400	GLYMA_02G063400	GLYMA_07G159100	GLYMA_08G240100	GLYMA_17G262300	GLYMA_10G206900	GLYMA_15G170500		GLYMA_12G021800		GLYMA_20G057500
GLYMA_02G261900	GLYMA_18G273000	GLYMA_09G172100	GLYMA_13G052900	GLYMA_12G196200	GLYMA_19G198700	ENSRNA050030397	GLYMA_05G042800	GLYMA_10G072000	GLYMA_19G135600		GLYMA_02G261900		GLYMA_14G179200
GLYMA_03G204900	GLYMA_19G203500	GLYMA_11G037300	GLYMA_17G210500	GLYMA_14G018800	GLYMA_05G214900	GLYMA_03G008100	GLYMA_18G265200	GLYMA_15G149600	GLYMA_19G159000		GLYMA_03G204900		GLYMA_11G256100
GLYMA_08G021700	GLYMA_17G111100	GLYMA_08G325200	GLYMA_15G144600	GLYMA_06G290300	GLYMA_12G053800	GLYMA_01G085200	GLYMA_16G188900	GLYMA_20G006600	GLYMA_01G036000		GLYMA_08G021700		GLYMA_02G108600
GLYMA_19G167200	GLYMA_19G027400	GLYMA_10G154100	GLYMA_02G110900	GLYMA_01G116300	GLYMA_01G006800	GLYMA_17G015400	GLYMA_19G144500	GLYMA_18G245100	GLYMA_08G033100		GLYMA_19G167200		GLYMA_06G169700
GLYMA_07G069500	GLYMA_02G292700	GLYMA_16G010500	GLYMA_09G130000	GLYMA_17G262300	GLYMA_06G318200	GLYMA_12G180200	GLYMA_19G234100	GLYMA_20G194900	GLYMA_09G013800		GLYMA_07G069500		GLYMA_09G138300
GLYMA_18G284400	GLYMA_14G056300	GLYMA_20G207200	GLYMA_16G165200	GLYMA_09G022400	GLYMA_13G147700	GLYMA_10G154200	GLYMA_09G200800	GLYMA_19G251500	GLYMA_09G166300		GLYMA_18G284400		GLYMA_20G179700
GLYMA_11G045800	GLYMA_06G165100	GLYMA_10G053000	GLYMA_07G009900	GLYMA_12G021800	GLYMA_06G307600	GLYMA_02G052700	GLYMA_19G128400	GLYMA_02G128000	GLYMA_11G030800		GLYMA_11G045800		GLYMA_14G048400
GLYMA_13G243800	GLYMA_11G244300	GLYMA_04G001100	GLYMA_19G112700	GLYMA_04G230200	GLYMA_18G216200	GLYMA_15G258200	GLYMA_03G072300	GLYMA_04G001100	GLYMA_07G186700		GLYMA_13G243800		GLYMA_13G278400
GLYMA_15G265800	GLYMA_09G263100	GLYMA_04G133500	GLYMA_15G018700	GLYMA_04G223000	GLYMA_13G049700	GLYMA_03G197300	GLYMA_15G273700	GLYMA_04G003200	GLYMA_08G279600		GLYMA_15G265800		GLYMA_15G114800
GLYMA_08G329600	GLYMA_09G201900	GLYMA_07G202500	GLYMA_03G064100	GLYMA_08G062500	GLYMA_08G033000	GLYMA_05G181100	GLYMA_10G247500	GLYMA_13G049700	GLYMA_09G028400		GLYMA_08G329600		GLYMA_02G017100
GLYMA_11G243400	GLYMA_02G265900	GLYMA_09G237000	GLYMA_02G095600	GLYMA_18G216200	GLYMA_07G218900	GLYMA_19G014500	GLYMA_04G191200	GLYMA_13G108500	GLYMA_06G307600		GLYMA_11G243400		GLYMA_11G220300
GLYMA_07G139800	GLYMA_16G057400	GLYMA_02G296800	GLYMA_16G026800	GLYMA_04G098800	GLYMA_15G136700	GLYMA_09G247700	GLYMA_17G212200	GLYMA_03G144700	GLYMA_08G329600		GLYMA_07G139800		GLYMA_04G225400
GLYMA_07G159700	GLYMA_09G131500	GLYMA_11G219600	GLYMA_04G006400	GLYMA_04G100600	GLYMA_12G011400	GLYMA_01G020400	GLYMA_11G246300	GLYMA_11G052200	GLYMA_16G192400		GLYMA_07G159700		GLYMA_08G017300
GLYMA_04G223000	GLYMA_10G189400	GLYMA_13G331600	GLYMA_12G090700	GLYMA_13G349300	GLYMA_14G052600	GLYMA_07G202500	GLYMA_11G158200	GLYMA_05G055300	GLYMA_07G180600		GLYMA_04G223000		GLYMA_08G038200
GLYMA_19G142000	GLYMA_17G009900	GLYMA_08G130600	GLYMA_19G147700	GLYMA_01G150100	GLYMA_06G143700	GLYMA_16G165600	GLYMA_06G240400	GLYMA_09G029600	GLYMA_13G345400		GLYMA_19G142000		GLYMA_01G232400
GLYMA_03G149300	GLYMA_11G232000	GLYMA_15G148300	GLYMA_09G244400	GLYMA_09G170500	GLYMA_01G168500	GLYMA_20G095900	GLYMA_06G134800	GLYMA_02G092500	GLYMA_13G303700		GLYMA_03G149300		GLYMA_14G224000
GLYMA_20G137700	GLYMA_13G233600	GLYMA_13G066600	GLYMA_15G054500	GLYMA_15G004300	GLYMA_01G124700	GLYMA_03G047100	GLYMA_04G098800	GLYMA_13G349300	GLYMA_12G053800		GLYMA_20G137700		GLYMA_12G179700
GLYMA_09G092600	GLYMA_19G184900	GLYMA_10G045500	GLYMA_08G213100	GLYMA_03G047100	GLYMA_14G009000	GLYMA_11G219600	GLYMA_01G150100	GLYMA_10G090000	GLYMA_17G252500		GLYMA_09G092600		GLYMA_20G162600
GLYMA_19G144500	GLYMA_14G007900	GLYMA_06G116100	GLYMA_19G102700	GLYMA_18G288800	GLYMA_18G060900	GLYMA_17G224500	GLYMA_10G178100	GLYMA_15G276000	GLYMA_02G035700		GLYMA_19G144500		GLYMA_20G150300
GLYMA_13G341800	GLYMA_09G128600	GLYMA_04G027400	GLYMA_14G223000	GLYMA_08G336300	GLYMA_01G025200	GLYMA_03G138300	GLYMA_11G130900	GLYMA_04G165900	GLYMA_06G318200		GLYMA_13G341800		GLYMA_05G161500
GLYMA_09G237000	GLYMA_08G094000	GLYMA_04G017800	GLYMA_16G166000	GLYMA_03G237700	GLYMA_17G103300	GLYMA_13G094100	GLYMA_18G147000	GLYMA_14G101800	GLYMA_01G004200		GLYMA_09G237000		GLYMA_20G033900
GLYMA_18G037800	GLYMA_19G183800	GLYMA_09G028700	GLYMA_01G124100	GLYMA_14G031100	GLYMA_04G060800	GLYMA_19G114600	GLYMA_03G123600	GLYMA_08G042000	GLYMA_09G128300		GLYMA_18G037800		GLYMA_18G211800
GLYMA_19G184900	GLYMA_19G235400	GLYMA_11G109200	GLYMA_06G125800	GLYMA_07G054100	GLYMA_19G169200	GLYMA_05G007600	GLYMA_02G069700	GLYMA_06G290300	GLYMA_09G132200		GLYMA_19G184900		GLYMA_02G145100
GLYMA_12G187000	GLYMA_16G165700	GLYMA_04G173200	GLYMA_05G107400	GLYMA_15G273700	GLYMA_09G094400	GLYMA_08G230700	GLYMA_14G067400	GLYMA_12G105600	GLYMA_07G140700		GLYMA_12G187000		GLYMA_07G022400
GLYMA_03G001600	GLYMA_14G140900	GLYMA_03G125600	GLYMA_17G086500	GLYMA_07G181400	GLYMA_02G185400	GLYMA_11G241900	GLYMA_15G089000	GLYMA_15G058300	GLYMA_20G061100		GLYMA_03G001600		GLYMA_14G205200
GLYMA_10G200800	GLYMA_18G278100	GLYMA_02G181600	GLYMA_16G113000	GLYMA_17G236500	GLYMA_13G084000	GLYMA_19G027400	GLYMA_09G111500	GLYMA_13G331600	GLYMA_09G216600		GLYMA_10G200800		GLYMA_03G217500
GLYMA_10G129500	GLYMA_12G063900	GLYMA_08G168400	GLYMA_09G018100	GLYMA_06G027200	GLYMA_06G010500	GLYMA_19G214100	GLYMA_19G203500	GLYMA_11G095700	GLYMA_10G050400		GLYMA_10G129500		GLYMA_02G212000
ENSRNA050030464	GLYMA_03G062800	GLYMA_09G094600	GLYMA_03G192200	GLYMA_08G220700	GLYMA_13G368700	GLYMA_16G181600	GLYMA_10G189700	GLYMA_09G018100	GLYMA_08G198100		ENSRNA050030464		GLYMA_14G011100
GLYMA_04G250100	GLYMA_05G214400	GLYMA_11G130900	GLYMA_06G026900	GLYMA_07G186700	GLYMA_19G159300	GLYMA_12G021800	GLYMA_14G016800	GLYMA_03G166000	GLYMA_07G093900		GLYMA_04G250100		GLYMA_10G061300
GLYMA_16G128800	GLYMA_16G151200	GLYMA_13G371500	GLYMA_15G144700	GLYMA_04G043500	GLYMA_18G186900	GLYMA_01G239800	GLYMA_15G149600	GLYMA_19G033800	GLYMA_08G198000		GLYMA_16G128800		GLYMA_11G110900
GLYMA_18G289600	GLYMA_12G107600	GLYMA_07G193600	GLYMA_18G210700	GLYMA_06G113700	GLYMA_15G121000	GLYMA_16G138600	GLYMA_13G056500	GLYMA_13G208300	GLYMA_18G120000		GLYMA_18G289600		GLYMA_19G179800
GLYMA_08G366700	GLYMA_08G221600	GLYMA_11G146600	GLYMA_18G289100	GLYMA_08G180300	GLYMA_05G008300	GLYMA_01G031300	GLYMA_06G084700	GLYMA_09G204100	GLYMA_13G079300		GLYMA_08G366700		GLYMA_19G150900
GLYMA_11G238800	GLYMA_11G033900	GLYMA_15G113200	GLYMA_01G170000	GLYMA_04G152100	GLYMA_U044600	GLYMA_13G196200	GLYMA_01G021200	GLYMA_07G010000	GLYMA_05G140700		GLYMA_11G238800		GLYMA_19G221000
GLYMA_18G049500	GLYMA_03G227600	GLYMA_17G211900	GLYMA_18G099500	GLYMA_03G153600	GLYMA_13G303700	GLYMA_06G100500	GLYMA_13G353900	GLYMA_03G157800	GLYMA_20G196400		GLYMA_18G049500		GLYMA_04G065800
GLYMA_08G039300	GLYMA_16G053000	GLYMA_05G226100	GLYMA_08G028800	GLYMA_03G071700	GLYMA_06G117800	GLYMA_17G013400	GLYMA_03G217500	GLYMA_06G289900	GLYMA_16G168700		GLYMA_08G039300		GLYMA_07G208000
GLYMA_11G012400	GLYMA_02G208200	GLYMA_10G263500	GLYMA_06G081800	GLYMA_14G181800	GLYMA_03G217800	GLYMA_13G250900	GLYMA_05G055300	GLYMA_12G053800	GLYMA_11G162500		GLYMA_11G012400		GLYMA_09G045900
GLYMA_11G214500	GLYMA_04G022100	GLYMA_06G026600	GLYMA_07G141500	GLYMA_15G148300	GLYMA_17G015400	GLYMA_19G253500	GLYMA_08G037800	GLYMA_13G169700	GLYMA_09G138100		GLYMA_11G214500		GLYMA_14G132500
GLYMA_13G353900	GLYMA_11G238800	GLYMA_19G055400	GLYMA_18G271400	GLYMA_18G259600	GLYMA_05G196000	GLYMA_05G149700	GLYMA_15G257700	GLYMA_13G307000	GLYMA_18G281400		GLYMA_13G353900		GLYMA_12G096900
GLYMA_03G108000	GLYMA_05G214900	GLYMA_04G133400	GLYMA_09G219300	GLYMA_19G159300	GLYMA_01G211000	GLYMA_13G310700	GLYMA_12G137000	GLYMA_12G179700	GLYMA_07G105800		GLYMA_03G108000		GLYMA_10G138500
GLYMA_20G247900	GLYMA_15G221000	GLYMA_13G253200	GLYMA_U040400	GLYMA_20G095900	GLYMA_01G209500	GLYMA_16G201100	GLYMA_03G041200	GLYMA_08G344300	GLYMA_14G171700		GLYMA_20G247900		GLYMA_20G210900
GLYMA_06G026600	GLYMA_15G222200	GLYMA_06G027200	GLYMA_02G126100	GLYMA_17G111100	GLYMA_20G049800	GLYMA_11G085200	GLYMA_07G031200	GLYMA_08G038200	GLYMA_20G234800		GLYMA_06G026600		GLYMA_13G355600
GLYMA_09G192700	GLYMA_13G228900	GLYMA_12G234500	GLYMA_05G007600	GLYMA_09G234700	GLYMA_05G226100	GLYMA_19G151400	GLYMA_14G116400	GLYMA_12G096900	GLYMA_13G339800		GLYMA_09G192700		GLYMA_08G314900
GLYMA_13G208300	GLYMA_07G266700	GLYMA_05G061900	GLYMA_03G139500	GLYMA_17G015400	GLYMA_14G210600	GLYMA_10G045500	GLYMA_04G001100	GLYMA_11G208600	GLYMA_06G295000		GLYMA_13G208300		GLYMA_13G264400
GLYMA_05G001500	GLYMA_09G182500	GLYMA_18G263700	GLYMA_17G100200	GLYMA_07G084200	GLYMA_13G304400	GLYMA_11G002100	GLYMA_03G153600	GLYMA_07G201000	GLYMA_11G044400		GLYMA_05G001500		GLYMA_14G085500
GLYMA_15G134400	GLYMA_11G233500	GLYMA_10G200800	GLYMA_01G085200	GLYMA_14G224000	GLYMA_14G052500	GLYMA_11G162500	GLYMA_17G227400	GLYMA_11G022100	GLYMA_09G131500		GLYMA_15G134400		GLYMA_08G201200
GLYMA_04G004600	GLYMA_18G272200	GLYMA_03G012800	GLYMA_10G154100	GLYMA_18G091300	GLYMA_11G037300	GLYMA_15G176500	GLYMA_10G182800	GLYMA_14G115500	GLYMA_13G245600		GLYMA_04G004600		GLYMA_05G027500
GLYMA_13G038600	GLYMA_19G127200	GLYMA_20G111900	GLYMA_02G292700	GLYMA_12G234500	GLYMA_13G081000	GLYMA_19G234100	GLYMA_18G288800	GLYMA_13G233400	GLYMA_02G143200		GLYMA_13G038600		GLYMA_04G190500
GLYMA_10G259800	GLYMA_07G129900	GLYMA_16G167100	GLYMA_06G190100	GLYMA_01G173500	GLYMA_11G166500	GLYMA_18G152500	GLYMA_14G052600	GLYMA_05G208700	GLYMA_19G127200		GLYMA_10G259800		GLYMA_18G023500
GLYMA_02G099600	GLYMA_01G239800	GLYMA_19G213500	GLYMA_13G191900	GLYMA_04G070500	GLYMA_08G295600	GLYMA_11G146600	GLYMA_13G307000	GLYMA_12G216300	GLYMA_20G130200		GLYMA_02G099600		GLYMA_02G059500
GLYMA_03G216100	GLYMA_06G240400	GLYMA_14G181800	GLYMA_13G233700	GLYMA_18G109600	GLYMA_18G297200	GLYMA_U044600	GLYMA_13G143700	GLYMA_14G029800	GLYMA_05G109400		GLYMA_03G216100		GLYMA_02G172800
GLYMA_02G259800	GLYMA_19G250200	GLYMA_17G213100	GLYMA_10G189400	GLYMA_10G048500	GLYMA_13G304100	GLYMA_06G116100	GLYMA_03G145800	GLYMA_19G219500	GLYMA_06G125800		GLYMA_02G259800		GLYMA_17G047200
GLYMA_03G144700	GLYMA_03G131700	GLYMA_12G055200	GLYMA_U033000	GLYMA_08G132700	GLYMA_15G157400	GLYMA_13G253200	GLYMA_13G066600	GLYMA_13G214400	GLYMA_12G075200		GLYMA_03G144700		GLYMA_13G079900
GLYMA_15G273700	GLYMA_06G103700	GLYMA_07G027300	GLYMA_18G201100	GLYMA_04G017800	GLYMA_10G195700	GLYMA_05G118800	GLYMA_10G081900	GLYMA_02G277600	GLYMA_19G035300		GLYMA_15G273700		GLYMA_15G267000
GLYMA_09G132200	GLYMA_10G077800	GLYMA_19G238400	GLYMA_15G149600	GLYMA_06G112700	GLYMA_08G181900	GLYMA_20G194900	GLYMA_13G341800	GLYMA_07G096500	GLYMA_18G167600		GLYMA_09G132200		GLYMA_01G208000
GLYMA_13G359700	GLYMA_16G128800	GLYMA_15G127900	GLYMA_20G006600	GLYMA_16G216400	GLYMA_03G206800	GLYMA_14G064000	GLYMA_16G201100	GLYMA_10G178100	GLYMA_18G071400		GLYMA_13G359700		GLYMA_11G192600
GLYMA_13G321200	GLYMA_12G216300	GLYMA_11G202800	GLYMA_05G208700	GLYMA_14G100000	GLYMA_14G018800	GLYMA_03G141800	GLYMA_16G148600	GLYMA_03G145500	GLYMA_03G145500		GLYMA_13G321200		GLYMA_15G019300
GLYMA_01G146800	GLYMA_14G176300	GLYMA_13G088300	GLYMA_06G022800	GLYMA_03G171900	GLYMA_10G077800	GLYMA_14G173600	GLYMA_19G249800	GLYMA_17G218900	GLYMA_18G249100		GLYMA_01G146800		GLYMA_05G211400
GLYMA_20G095900	GLYMA_15G032500	GLYMA_19G214100	GLYMA_09G269700	GLYMA_03G064100	GLYMA_02G289600	GLYMA_04G055500	GLYMA_04G003400	GLYMA_12G011400	GLYMA_01G137200		GLYMA_20G095900		GLYMA_17G034900
GLYMA_16G017400	GLYMA_15G239600	GLYMA_13G368700	GLYMA_09G166600	GLYMA_07G116800	GLYMA_04G026700	GLYMA_06G133100	GLYMA_14G029900	GLYMA_16G113000	GLYMA_16G174700		GLYMA_16G017400		GLYMA_01G191600
GLYMA_17G096500	GLYMA_20G142100	GLYMA_20G191600	GLYMA_19G085900	GLYMA_02G285000	GLYMA_04G190600	GLYMA_02G228000	GLYMA_08G230700	GLYMA_13G051000	GLYMA_07G098900		GLYMA_17G096500		GLYMA_03G179100
GLYMA_09G018100	GLYMA_08G271000	GLYMA_12G053800	GLYMA_13G283900	GLYMA_01G076700	GLYMA_14G007000	GLYMA_18G288800	GLYMA_15G128200	GLYMA_08G254400	GLYMA_20G234200		GLYMA_09G018100		GLYMA_12G076700
GLYMA_04G026700	GLYMA_10G136700	GLYMA_11G068700	GLYMA_03G116000	GLYMA_19G151400	GLYMA_02G080800	GLYMA_08G308300	GLYMA_20G142100	GLYMA_02G143200	GLYMA_02G046200		GLYMA_04G026700		GLYMA_02G265700
ENSRNA050000357	GLYMA_12G179700	GLYMA_17G013400	GLYMA_13G307000	GLYMA_15G138000	GLYMA_10G103100	GLYMA_04G001100	GLYMA_20G196000	GLYMA_20G207200	GLYMA_19G226000		ENSRNA050000357		GLYMA_13G354900
GLYMA_07G019800	GLYMA_08G175300	GLYMA_10G011500	GLYMA_13G086800	GLYMA_15G270900	GLYMA_19G258000	GLYMA_05G215500	GLYMA_08G200000	GLYMA_05G013700	GLYMA_10G090000		GLYMA_07G019800		GLYMA_09G087100
GLYMA_04G227500	GLYMA_08G240100	GLYMA_10G241700	GLYMA_11G246300	GLYMA_07G215100	GLYMA_05G208700	GLYMA_13G371500	GLYMA_08G024400	GLYMA_08G243100	GLYMA_12G224100		GLYMA_04G227500		GLYMA_04G215900
GLYMA_12G063400	GLYMA_07G011900	GLYMA_09G071300	GLYMA_06G063600	GLYMA_12G137000	GLYMA_11G073100	GLYMA_07G169400	GLYMA_07G141500	GLYMA_12G004600	GLYMA_09G038600		GLYMA_12G063400		GLYMA_17G098100
GLYMA_05G195200	GLYMA_18G289100	GLYMA_08G062500	GLYMA_05G094900	GLYMA_05G060800	GLYMA_06G324100	GLYMA_03G261900	GLYMA_09G122500	GLYMA_11G241900	GLYMA_09G092600		GLYMA_05G195200		GLYMA_06G113400
GLYMA_06G125700	GLYMA_01G085200	GLYMA_03G141800	GLYMA_15G100100	GLYMA_12G226500	GLYMA_04G191100	GLYMA_13G178800	GLYMA_09G170500	GLYMA_17G046700	GLYMA_03G041200		GLYMA_06G125700		GLYMA_03G217300
GLYMA_09G029600	GLYMA_20G186200	GLYMA_04G043500	GLYMA_20G206200	GLYMA_02G016500	GLYMA_10G200800	GLYMA_18G042100	GLYMA_19G055400	GLYMA_19G214100	GLYMA_10G195200		GLYMA_09G029600		GLYMA_08G165700
GLYMA_13G206700	GLYMA_18G265200	GLYMA_19G027400	GLYMA_15G211600	GLYMA_05G014900	GLYMA_14G016800	GLYMA_18G048000	GLYMA_11G202800	GLYMA_11G166500	GLYMA_16G124700		GLYMA_13G206700		GLYMA_07G079600
GLYMA_15G075300	GLYMA_17G049800	GLYMA_09G268800	GLYMA_07G241400	GLYMA_13G136300	GLYMA_20G162600	GLYMA_18G037800	GLYMA_07G202500	GLYMA_10G295300	GLYMA_13G122100		GLYMA_15G075300		GLYMA_02G283400
GLYMA_04G043000	GLYMA_04G240600	GLYMA_14G067800	GLYMA_19G244100	GLYMA_08G344300	GLYMA_18G289600	GLYMA_19G030100	GLYMA_08G254600	GLYMA_17G262300	GLYMA_03G125000		GLYMA_04G043000		GLYMA_11G221000
GLYMA_05G119300	GLYMA_11G073300	GLYMA_03G071700	GLYMA_12G096900	GLYMA_09G214200	GLYMA_02G228000	GLYMA_17G262300	GLYMA_18G117800	GLYMA_09G071300	GLYMA_01G217400		GLYMA_05G119300		GLYMA_11G104100
GLYMA_12G149500	GLYMA_08G003400	GLYMA_13G239800	GLYMA_13G051900	GLYMA_10G136800	GLYMA_09G010800	GLYMA_17G065400	GLYMA_06G035700	GLYMA_02G126100	GLYMA_02G007400		GLYMA_12G149500		GLYMA_04G223100
GLYMA_13G089800	GLYMA_20G015900	GLYMA_15G005700	GLYMA_13G279800	GLYMA_17G227400	GLYMA_07G027300	GLYMA_13G165600	GLYMA_14G029800	GLYMA_16G206900	GLYMA_12G004600		GLYMA_13G089800		GLYMA_09G134100
GLYMA_10G027600	GLYMA_11G058200	GLYMA_18G082000	GLYMA_06G256500	GLYMA_15G055800	GLYMA_13G350300	GLYMA_12G107200	GLYMA_01G236200	GLYMA_10G182800	GLYMA_08G022900		GLYMA_10G027600		GLYMA_15G237600
GLYMA_17G065300	GLYMA_09G130000	GLYMA_20G234100	GLYMA_14G087800	GLYMA_14G066000	GLYMA_02G010600	GLYMA_06G289900	GLYMA_13G031500	GLYMA_02G261400	GLYMA_20G119300		GLYMA_17G065300		GLYMA_02G233200
GLYMA_02G069700	GLYMA_13G350300	GLYMA_06G000600	GLYMA_02G287400	GLYMA_05G208700	GLYMA_11G008300	GLYMA_19G250400	GLYMA_14G181800	GLYMA_08G000800	GLYMA_06G240400		GLYMA_02G069700		GLYMA_02G171100
GLYMA_13G250900	GLYMA_20G224300	GLYMA_09G259500	GLYMA_08G308500	GLYMA_03G123900	GLYMA_02G199300	GLYMA_01G021200	GLYMA_11G219600	GLYMA_08G309700	GLYMA_19G228400		GLYMA_13G250900		GLYMA_10G072000
GLYMA_09G028700	GLYMA_06G307600	GLYMA_02G034500	GLYMA_08G036200	GLYMA_11G055300	GLYMA_13G196200	GLYMA_13G202100	GLYMA_12G096900	GLYMA_16G181600	GLYMA_04G017800		GLYMA_09G028700		GLYMA_18G206000
GLYMA_08G006300	GLYMA_15G150100	GLYMA_19G234100	GLYMA_01G168500	GLYMA_07G045800	GLYMA_13G038600	GLYMA_10G050900	GLYMA_11G252800	GLYMA_02G296800	GLYMA_07G215500		GLYMA_08G006300		GLYMA_15G154900
GLYMA_03G224800	GLYMA_02G010400	GLYMA_13G061800	GLYMA_07G225700	GLYMA_15G210500	GLYMA_12G097200	GLYMA_15G018700	GLYMA_06G027200	GLYMA_18G057800	GLYMA_13G006700		GLYMA_03G224800		GLYMA_18G225100
GLYMA_17G132800	GLYMA_14G016100	GLYMA_19G203500	GLYMA_15G210500	GLYMA_03G157600	GLYMA_10G189400	GLYMA_15G201700	GLYMA_09G273800	GLYMA_02G235700	GLYMA_04G230400		GLYMA_17G132800		GLYMA_06G235000
GLYMA_03G008100	GLYMA_06G169700	GLYMA_19G199800	GLYMA_08G353500	GLYMA_13G254700	GLYMA_08G066800	ENSRNA050030429	GLYMA_14G056300	GLYMA_04G098800	GLYMA_13G319100		GLYMA_03G008100		GLYMA_13G163900
GLYMA_19G235300	GLYMA_09G138500	GLYMA_17G229000	GLYMA_15G005700	GLYMA_01G137200	GLYMA_16G206900	GLYMA_08G243100	GLYMA_09G115700	GLYMA_03G047100	GLYMA_07G143500		GLYMA_19G235300		GLYMA_08G038300
GLYMA_15G136700	GLYMA_05G228100	GLYMA_03G062800	GLYMA_03G224800	GLYMA_13G253200	GLYMA_03G157800	GLYMA_15G148300	GLYMA_11G124200	GLYMA_17G212200	GLYMA_18G147000		GLYMA_15G136700		GLYMA_02G097000
GLYMA_11G056600	GLYMA_03G140700	GLYMA_02G056000	GLYMA_20G135500	GLYMA_02G043200	GLYMA_06G142200	GLYMA_15G222200	GLYMA_02G248200	GLYMA_01G113400	GLYMA_14G203100		GLYMA_11G056600		GLYMA_08G255200
GLYMA_07G155200	GLYMA_19G205500	GLYMA_09G278000	GLYMA_01G210300	GLYMA_02G003800	GLYMA_08G344300	GLYMA_20G234100	GLYMA_13G099800	GLYMA_02G292100	GLYMA_10G158300		GLYMA_07G155200		GLYMA_18G275300
GLYMA_02G292100	GLYMA_20G234200	GLYMA_18G253500	GLYMA_14G064000	GLYMA_07G050000	GLYMA_04G186700	GLYMA_16G107600	GLYMA_02G300100	GLYMA_13G253200	GLYMA_10G249600		GLYMA_02G292100		GLYMA_17G139000
GLYMA_10G189400	GLYMA_10G001800	GLYMA_18G043800	GLYMA_02G263300	GLYMA_09G094400	GLYMA_13G345400	GLYMA_19G167200	GLYMA_11G068400	GLYMA_11G032200	GLYMA_10G072000		GLYMA_10G189400		GLYMA_19G112700
GLYMA_12G195900	GLYMA_05G049300	GLYMA_20G194900	GLYMA_15G025300	GLYMA_13G069900	GLYMA_09G201900	GLYMA_19G214500	GLYMA_06G289900	GLYMA_08G229100	GLYMA_18G257000		GLYMA_12G195900		GLYMA_05G151400
GLYMA_02G287400	GLYMA_09G092600	GLYMA_09G111500	GLYMA_03G177300	GLYMA_15G243000	GLYMA_14G029800	GLYMA_07G133700	GLYMA_20G144300	GLYMA_13G310700	GLYMA_06G142200		GLYMA_02G287400		GLYMA_07G144700
GLYMA_05G231600	GLYMA_18G295700	GLYMA_20G095900	GLYMA_01G129600	GLYMA_02G157700	GLYMA_19G147800	GLYMA_17G227400	GLYMA_09G190200	GLYMA_09G228000	GLYMA_06G061200		GLYMA_05G231600		GLYMA_02G148300
GLYMA_14G097000	GLYMA_03G149300	GLYMA_02G157700	GLYMA_20G150400	GLYMA_20G142100	GLYMA_12G216300	GLYMA_10G138200	GLYMA_01G183900	GLYMA_15G057700	GLYMA_16G169200		GLYMA_14G097000		GLYMA_11G073100
GLYMA_19G111700	GLYMA_13G256600	GLYMA_01G186700	GLYMA_04G071600	GLYMA_13G362800	GLYMA_20G074700	GLYMA_19G235400	GLYMA_15G136700	GLYMA_07G260600	GLYMA_05G050400		GLYMA_19G111700		GLYMA_17G075300
GLYMA_03G145500	GLYMA_20G137700	GLYMA_15G024600	GLYMA_16G128800	GLYMA_15G011000	GLYMA_13G307000	GLYMA_14G181800	GLYMA_07G084200	GLYMA_11G037200	GLYMA_14G067100		GLYMA_03G145500		GLYMA_19G205500
GLYMA_06G088800	GLYMA_06G067000	GLYMA_06G088800	GLYMA_16G139400	GLYMA_20G147600	GLYMA_19G147700	GLYMA_04G022100	GLYMA_10G004800	GLYMA_18G216200	GLYMA_11G130900		GLYMA_06G088800		GLYMA_U038600
GLYMA_18G265200	GLYMA_11G170000	GLYMA_07G249000	GLYMA_10G028500	GLYMA_08G287500	GLYMA_20G147700	GLYMA_18G082000	GLYMA_19G235400	GLYMA_19G231700	GLYMA_02G126100		GLYMA_18G265200		GLYMA_11G176000
GLYMA_13G101500	GLYMA_07G151600	GLYMA_10G138200	GLYMA_13G306300	GLYMA_01G044800	GLYMA_05G055300	GLYMA_12G096900	GLYMA_20G217600	GLYMA_16G063400	GLYMA_18G030700		GLYMA_13G101500		GLYMA_11G076100
GLYMA_15G057700	GLYMA_20G138500	GLYMA_14G174600	GLYMA_10G220700	GLYMA_18G049500	GLYMA_02G235900	GLYMA_15G149000	GLYMA_05G208700	GLYMA_14G094500	GLYMA_09G263100		GLYMA_15G057700		GLYMA_14G051900
GLYMA_02G046200	GLYMA_18G199300	GLYMA_13G104700	GLYMA_09G111500	GLYMA_07G009900	GLYMA_20G115900	GLYMA_13G173100	GLYMA_17G033200	GLYMA_03G152500	GLYMA_09G237000		GLYMA_02G046200		GLYMA_01G211000
ENSRNA050001937	GLYMA_15G144700	GLYMA_05G215500	GLYMA_16G091100	GLYMA_04G001100	GLYMA_08G033100	GLYMA_14G154200	GLYMA_03G166000	GLYMA_13G215000	GLYMA_17G229000		ENSRNA050001937		GLYMA_09G039500
GLYMA_03G012800	GLYMA_18G212500	GLYMA_08G200000	GLYMA_08G003400	GLYMA_18G225000	GLYMA_08G180900	GLYMA_14G087400	GLYMA_04G055500	GLYMA_09G031600	GLYMA_19G247800		GLYMA_03G012800		GLYMA_19G213900
GLYMA_18G187100	GLYMA_09G022000	GLYMA_14G048200	GLYMA_13G031500	GLYMA_17G249500	GLYMA_05G044000	GLYMA_20G131100	GLYMA_07G027300	GLYMA_13G062500	GLYMA_13G341800		GLYMA_18G187100		GLYMA_01G038600
GLYMA_06G289900	GLYMA_20G152600	GLYMA_15G144100	GLYMA_04G219900	GLYMA_12G051800	GLYMA_07G116700	GLYMA_06G125700	GLYMA_11G037300	GLYMA_05G195200	GLYMA_12G191000		GLYMA_06G289900		GLYMA_10G117200
GLYMA_17G015400	GLYMA_02G203300	GLYMA_11G095700	GLYMA_01G054100	GLYMA_07G260600	GLYMA_13G300400	GLYMA_03G157000	GLYMA_19G013000	GLYMA_03G177300	GLYMA_06G117800		GLYMA_17G015400		GLYMA_14G053100
GLYMA_11G052200	GLYMA_08G163100	GLYMA_10G259800	GLYMA_02G203300	GLYMA_01G127100	GLYMA_14G056300	GLYMA_01G210500	GLYMA_20G156300	GLYMA_18G049500	GLYMA_11G243400		GLYMA_11G052200		GLYMA_08G035000
GLYMA_16G063400	GLYMA_14G004800	GLYMA_20G142100	GLYMA_17G260400	GLYMA_04G039600	GLYMA_13G133200	GLYMA_14G067400	GLYMA_09G039800	GLYMA_15G131600	GLYMA_10G156500		GLYMA_16G063400		GLYMA_05G190300
GLYMA_06G052800	GLYMA_17G065300	GLYMA_19G128400	GLYMA_08G345100	GLYMA_07G031200	GLYMA_17G212200	GLYMA_12G195900	GLYMA_03G062800	GLYMA_09G166300	GLYMA_13G147600		GLYMA_06G052800		GLYMA_02G311900
GLYMA_05G008300	GLYMA_02G277600	GLYMA_04G169400	GLYMA_07G079600	GLYMA_02G263300	GLYMA_09G028100	ENSRNA050002967	GLYMA_02G199300	GLYMA_11G092600	GLYMA_16G122700		GLYMA_05G008300		GLYMA_06G307000
GLYMA_14G053900	GLYMA_11G104200	GLYMA_15G210600	GLYMA_08G271000	GLYMA_04G132200	GLYMA_14G205200	GLYMA_15G239600	GLYMA_06G000600	GLYMA_10G138200	GLYMA_08G309700		GLYMA_14G053900		GLYMA_19G260000
GLYMA_11G020800	GLYMA_19G143300	GLYMA_05G028700	GLYMA_05G140700	GLYMA_06G154500	GLYMA_19G026000	GLYMA_08G158800	GLYMA_08G227400	GLYMA_05G215500	GLYMA_04G165900		GLYMA_11G020800		GLYMA_14G052100
GLYMA_11G140500	GLYMA_01G229600	GLYMA_08G207600	GLYMA_06G006100	GLYMA_13G243800	GLYMA_20G139500	GLYMA_02G157700	GLYMA_11G233500	GLYMA_15G144100	GLYMA_07G202500		GLYMA_11G140500		GLYMA_09G043900
GLYMA_01G166300	GLYMA_02G068800	GLYMA_19G195300	GLYMA_08G360300	GLYMA_05G188700	GLYMA_12G132800	GLYMA_03G252800	GLYMA_12G121200	GLYMA_13G303700	GLYMA_18G205500		GLYMA_01G166300		GLYMA_07G020900
GLYMA_11G124200	GLYMA_13G361300	GLYMA_12G018900	GLYMA_15G145000	GLYMA_18G094300	GLYMA_08G028800	GLYMA_11G097800	GLYMA_10G215000	GLYMA_19G114600	GLYMA_08G201200		GLYMA_11G124200		GLYMA_06G082300
GLYMA_06G102400	GLYMA_13G248200	GLYMA_03G163100	GLYMA_14G111600	GLYMA_09G275200	GLYMA_08G251500	GLYMA_13G191900	GLYMA_07G019800	GLYMA_02G219800	GLYMA_15G143700		GLYMA_06G102400		GLYMA_20G085900
GLYMA_06G112700	GLYMA_02G046200	GLYMA_15G149600	GLYMA_06G297400	GLYMA_12G197600	GLYMA_14G067000	GLYMA_03G012800	GLYMA_02G299800	GLYMA_14G223000	GLYMA_16G046300		GLYMA_06G112700		GLYMA_13G081400
GLYMA_06G189900	GLYMA_17G046700	GLYMA_17G262300	GLYMA_04G150600	GLYMA_06G088700	GLYMA_20G238300	GLYMA_03G217500	GLYMA_12G107200	GLYMA_08G358600	GLYMA_06G125600		GLYMA_06G189900		GLYMA_02G100800
GLYMA_07G048100	GLYMA_09G234700	GLYMA_02G080700	GLYMA_15G221600	GLYMA_19G005400	GLYMA_14G063300	GLYMA_14G029800	GLYMA_07G032700	GLYMA_11G228000	GLYMA_18G230800		GLYMA_07G048100		GLYMA_07G010000
GLYMA_14G207900	GLYMA_18G038000	GLYMA_12G013100	GLYMA_15G229400	GLYMA_10G241600	GLYMA_U038600	GLYMA_16G113000	GLYMA_13G048100	GLYMA_14G174600	GLYMA_15G160800		GLYMA_14G207900		GLYMA_16G217700
GLYMA_04G220700	GLYMA_13G350000	GLYMA_14G154200	GLYMA_11G022600	GLYMA_13G210500	GLYMA_10G211000	GLYMA_14G018800	GLYMA_13G319100	GLYMA_09G029400	GLYMA_03G237700		GLYMA_04G220700		GLYMA_02G046800
GLYMA_11G095700	GLYMA_01G124500	GLYMA_13G122100	GLYMA_14G208800	GLYMA_01G021200	GLYMA_02G261900	GLYMA_18G103500	GLYMA_05G057500	GLYMA_07G141500	GLYMA_09G192700		GLYMA_11G095700		GLYMA_16G113000
GLYMA_15G211600	GLYMA_18G275300	GLYMA_14G041300	GLYMA_03G116200	GLYMA_14G075600	GLYMA_11G139800	GLYMA_12G007100	GLYMA_13G306300	GLYMA_02G202500	GLYMA_13G104700		GLYMA_15G211600		GLYMA_03G175100
GLYMA_08G240100	GLYMA_07G022400	GLYMA_02G045900	GLYMA_13G264400	GLYMA_18G225100	GLYMA_03G152500	GLYMA_20G132200	GLYMA_08G344300	GLYMA_09G046100	GLYMA_13G250900		GLYMA_08G240100		GLYMA_08G017700
GLYMA_02G277600	GLYMA_20G129200	GLYMA_19G235400	GLYMA_01G211000	GLYMA_14G154200	GLYMA_15G012600	GLYMA_14G220600	GLYMA_03G006800	GLYMA_08G038300	GLYMA_17G123400		GLYMA_02G277600		GLYMA_05G068400
GLYMA_01G137200	GLYMA_06G269200	GLYMA_20G212100	GLYMA_05G228100	GLYMA_13G165600	GLYMA_11G241900	GLYMA_14G067700	GLYMA_15G002200	GLYMA_08G319200	GLYMA_13G253200		GLYMA_01G137200		GLYMA_18G272300
GLYMA_02G107400	GLYMA_05G208700	GLYMA_16G113000	GLYMA_17G060200	GLYMA_07G146500	GLYMA_05G151400	GLYMA_04G252700	GLYMA_11G073100	GLYMA_15G258600	GLYMA_13G256600		GLYMA_02G107400		GLYMA_15G135500
GLYMA_17G229000	GLYMA_04G048500	GLYMA_13G349300	GLYMA_04G137600	GLYMA_13G265500	GLYMA_18G258700	GLYMA_12G202700	GLYMA_14G009000	GLYMA_13G119000	GLYMA_07G165900		GLYMA_17G229000		GLYMA_06G171700
GLYMA_01G085200	GLYMA_01G002400	GLYMA_13G031500	GLYMA_12G076700	GLYMA_05G188600	GLYMA_11G228000	GLYMA_16G053000	GLYMA_07G107200	GLYMA_13G287600	GLYMA_16G077900		GLYMA_01G085200		GLYMA_04G209200
GLYMA_12G097800	GLYMA_12G015300	GLYMA_19G014500	GLYMA_18G109500	GLYMA_07G027300	GLYMA_18G003200	GLYMA_04G080600	GLYMA_20G131100	GLYMA_02G272100	GLYMA_07G027300		GLYMA_12G097800		GLYMA_13G081000
GLYMA_06G163200	GLYMA_02G093200	GLYMA_12G001300	GLYMA_12G225700	GLYMA_17G050200	GLYMA_03G078300	GLYMA_10G007200	GLYMA_15G150100	GLYMA_17G210500	GLYMA_01G229600		GLYMA_06G163200		GLYMA_02G227200
GLYMA_04G152100	GLYMA_02G292100	GLYMA_08G353500	GLYMA_19G186100	GLYMA_09G039800	GLYMA_01G217400	GLYMA_02G203300	GLYMA_07G215100	GLYMA_17G086500	GLYMA_07G099000		GLYMA_04G152100		GLYMA_08G175300
GLYMA_01G221600	GLYMA_08G366700	GLYMA_10G031200	GLYMA_04G025300	GLYMA_15G052000	GLYMA_08G032900	GLYMA_14G068300	GLYMA_03G162600	GLYMA_08G308300	GLYMA_20G245100		GLYMA_01G221600		GLYMA_08G039400
GLYMA_08G341100	GLYMA_08G285400	GLYMA_16G181600	GLYMA_16G126400	GLYMA_14G048400	GLYMA_15G146800	GLYMA_19G147200	GLYMA_06G100500	GLYMA_06G196600	GLYMA_06G196600		GLYMA_08G341100		GLYMA_15G063000
GLYMA_16G201900	GLYMA_13G305100	GLYMA_09G012200	GLYMA_14G156800	GLYMA_18G043800	GLYMA_20G210900	GLYMA_04G225400	GLYMA_05G001500	GLYMA_10G195700	GLYMA_03G197300		GLYMA_16G201900		GLYMA_17G127300
GLYMA_08G106400	GLYMA_15G239700	GLYMA_08G109400	GLYMA_14G007000	GLYMA_15G250900	GLYMA_05G197100	GLYMA_11G092600	GLYMA_01G124700	GLYMA_14G016800	GLYMA_16G175500		GLYMA_08G106400		GLYMA_13G362800
GLYMA_13G287600	GLYMA_15G042500	GLYMA_13G312700	GLYMA_17G127300	GLYMA_11G062600	GLYMA_16G077900	GLYMA_10G195200	GLYMA_04G048500	GLYMA_04G227500	GLYMA_02G219700		GLYMA_13G287600		GLYMA_16G153600
GLYMA_10G247300	GLYMA_09G018100	GLYMA_10G136700	GLYMA_06G264800	GLYMA_06G102400	GLYMA_19G043000	GLYMA_03G221300	GLYMA_17G211900	GLYMA_13G256600	GLYMA_17G227400		GLYMA_10G247300		GLYMA_12G037200
GLYMA_07G220300	GLYMA_14G194300	GLYMA_13G353900	GLYMA_20G027900	GLYMA_08G139700	GLYMA_10G072000	GLYMA_13G350300	GLYMA_06G294500	GLYMA_19G147800	GLYMA_06G235000		GLYMA_07G220300		GLYMA_05G246500
GLYMA_03G116200	GLYMA_20G203500	GLYMA_20G132200	GLYMA_16G188900	GLYMA_19G037600	GLYMA_13G169700	GLYMA_01G166300	GLYMA_19G230900	GLYMA_13G371500	GLYMA_08G109500		GLYMA_03G116200		GLYMA_13G311600
GLYMA_09G201900	GLYMA_08G253400	GLYMA_11G247400	GLYMA_07G021000	GLYMA_15G063200	GLYMA_19G034900	GLYMA_12G023800	GLYMA_18G152400	GLYMA_06G049500	GLYMA_19G014500		GLYMA_09G201900		GLYMA_14G049700
GLYMA_11G030800	GLYMA_01G170200	GLYMA_13G089800	GLYMA_01G180400	GLYMA_18G048000	GLYMA_13G259500	GLYMA_05G023600	GLYMA_01G042600	GLYMA_07G144700	GLYMA_09G204100		GLYMA_11G030800		GLYMA_13G281900
GLYMA_16G206300	GLYMA_19G147700	GLYMA_02G287400	GLYMA_08G139200	GLYMA_15G144100	GLYMA_05G248800	GLYMA_20G234200	GLYMA_07G260600	GLYMA_17G017200	GLYMA_17G138500		GLYMA_16G206300		GLYMA_19G178000
GLYMA_05G025600	GLYMA_08G195000	GLYMA_18G225100	GLYMA_13G298900	GLYMA_07G101000	GLYMA_U044100	GLYMA_12G116400	GLYMA_17G010200	GLYMA_08G325200	GLYMA_10G154100		GLYMA_05G025600		GLYMA_10G060700
GLYMA_12G053800	GLYMA_03G252500	GLYMA_07G205700	GLYMA_16G138600	GLYMA_09G060400	GLYMA_09G018100	GLYMA_15G089100	GLYMA_17G146500	GLYMA_07G019800	GLYMA_13G314400		GLYMA_12G053800		GLYMA_02G026300
GLYMA_20G142100	GLYMA_09G217800	GLYMA_06G112700	GLYMA_14G144000	GLYMA_12G035400	GLYMA_14G115500	GLYMA_13G214400	GLYMA_04G173200	GLYMA_04G017800	GLYMA_19G152400		GLYMA_20G142100		GLYMA_20G100500
GLYMA_15G211700	GLYMA_17G096500	GLYMA_19G144500	GLYMA_19G042900	GLYMA_13G300400	GLYMA_08G038300	GLYMA_12G055200	GLYMA_04G133400	GLYMA_03G040100	GLYMA_02G189700		GLYMA_15G211700		GLYMA_11G174100
GLYMA_19G151400	GLYMA_02G093400	GLYMA_20G123000	GLYMA_19G106400	GLYMA_04G004800	GLYMA_01G208000	GLYMA_14G004800	GLYMA_03G197300	GLYMA_20G191600	GLYMA_04G242400		GLYMA_19G151400		GLYMA_10G063100
GLYMA_19G176800	GLYMA_05G056100	GLYMA_17G233200	GLYMA_08G307300	GLYMA_12G070700	GLYMA_05G070600	GLYMA_19G144500	GLYMA_01G137200	GLYMA_16G188900	GLYMA_09G022400		GLYMA_19G176800		GLYMA_08G241600
GLYMA_14G210600	GLYMA_15G128300	GLYMA_17G227400	GLYMA_10G081900	GLYMA_02G035700	GLYMA_14G087400	GLYMA_07G054100	GLYMA_03G007500	GLYMA_01G208000	GLYMA_04G137600		GLYMA_14G210600		GLYMA_16G217000
GLYMA_01G129100	GLYMA_10G067100	GLYMA_11G253200	GLYMA_15G065900	GLYMA_18G281000	GLYMA_18G236700	GLYMA_18G222900	GLYMA_15G276000	GLYMA_20G196000	GLYMA_09G127200		GLYMA_01G129100		GLYMA_14G147800
GLYMA_12G121200	GLYMA_04G181500	GLYMA_10G250200	GLYMA_13G205400	GLYMA_13G283900	GLYMA_03G041300	GLYMA_02G296800	GLYMA_18G274200	GLYMA_03G012800	GLYMA_16G151200		GLYMA_12G121200		GLYMA_14G015700
GLYMA_04G165900	GLYMA_05G075100	GLYMA_13G208100	GLYMA_07G201000	GLYMA_20G147700	GLYMA_09G092600	GLYMA_06G000600	GLYMA_12G097600	GLYMA_18G271600	GLYMA_03G149200		GLYMA_04G165900		GLYMA_18G018600
GLYMA_13G283900	GLYMA_06G125700	GLYMA_07G039000	GLYMA_04G006500	GLYMA_12G053800	GLYMA_07G020400	GLYMA_13G321200	GLYMA_05G140700	GLYMA_05G138100	GLYMA_04G026700		GLYMA_13G283900		GLYMA_10G145200
GLYMA_13G306200	GLYMA_11G012400	GLYMA_17G048700	GLYMA_19G178000	GLYMA_15G138400	GLYMA_19G004400	GLYMA_15G063200	GLYMA_03G192200	GLYMA_09G155700	GLYMA_10G132300		GLYMA_13G306200		GLYMA_15G117000
GLYMA_11G104200	GLYMA_02G034700	GLYMA_15G144700	GLYMA_09G138500	GLYMA_13G305400	GLYMA_13G160400	GLYMA_08G038500	GLYMA_02G147500	GLYMA_09G068700	GLYMA_20G221400		GLYMA_11G104200		GLYMA_05G214300
GLYMA_11G193300	GLYMA_14G007000	GLYMA_03G057100	GLYMA_13G095200	GLYMA_04G173200	GLYMA_09G029600	GLYMA_14G053900	GLYMA_11G095700	GLYMA_02G185100	GLYMA_13G349300		GLYMA_11G193300		GLYMA_01G200500
GLYMA_04G221700	GLYMA_04G255500	GLYMA_08G240100	GLYMA_06G294500	GLYMA_09G201900	GLYMA_07G159700	GLYMA_16G139400	GLYMA_18G267900	GLYMA_09G022400	GLYMA_02G196000		GLYMA_04G221700		GLYMA_10G053900
GLYMA_15G002200	GLYMA_02G018900	GLYMA_05G014900	GLYMA_10G241600	GLYMA_08G229100	GLYMA_13G087100	GLYMA_20G033900	GLYMA_20G095900	GLYMA_13G114200	GLYMA_12G042900		GLYMA_15G002200		GLYMA_17G042400
GLYMA_06G307600	GLYMA_01G168500	GLYMA_08G039400	GLYMA_18G223000	GLYMA_05G001500	GLYMA_19G127200	GLYMA_14G099900	GLYMA_14G048400	GLYMA_17G239200	GLYMA_05G211600		GLYMA_06G307600		GLYMA_15G100900
GLYMA_14G213100	GLYMA_05G227600	GLYMA_15G032300	GLYMA_06G134800	GLYMA_12G132800	GLYMA_18G068400	GLYMA_05G188600	GLYMA_17G113000	GLYMA_14G064000	GLYMA_09G276800		GLYMA_14G213100		GLYMA_06G030500
GLYMA_06G113300	GLYMA_07G246500	GLYMA_09G018100	GLYMA_11G252800	GLYMA_01G006800	GLYMA_07G244400	GLYMA_06G189900	GLYMA_11G168000	GLYMA_06G093600	GLYMA_15G245100		GLYMA_06G113300		GLYMA_13G042500
GLYMA_04G017800	GLYMA_10G178100	GLYMA_13G009700	GLYMA_08G240100	GLYMA_13G371500	GLYMA_17G017200	GLYMA_20G006600	GLYMA_13G359700	GLYMA_13G369900	GLYMA_07G084200		GLYMA_04G017800		GLYMA_16G021700
GLYMA_17G105400	GLYMA_11G166500	GLYMA_16G165600	GLYMA_08G366700	GLYMA_12G007100	GLYMA_02G272100	GLYMA_12G018900	GLYMA_19G151400	GLYMA_06G143700	GLYMA_13G304900		GLYMA_17G105400		GLYMA_07G020400
GLYMA_02G285000	GLYMA_13G283900	GLYMA_08G308300	GLYMA_07G022400	GLYMA_05G181100	GLYMA_10G267700	GLYMA_15G032300	GLYMA_04G091800	GLYMA_03G063000	GLYMA_16G178800		GLYMA_02G285000		GLYMA_14G128500
GLYMA_19G023200	GLYMA_08G287500	GLYMA_09G192700	GLYMA_04G169400	GLYMA_03G016900	GLYMA_09G039500	GLYMA_09G010700	GLYMA_08G314700	GLYMA_15G148300	GLYMA_20G132200		GLYMA_19G023200		GLYMA_07G110900
GLYMA_08G268000	GLYMA_17G113000	GLYMA_18G232800	GLYMA_13G208300	GLYMA_02G239000	GLYMA_19G218300	GLYMA_07G132100	GLYMA_08G229100	GLYMA_20G162600	GLYMA_03G206000		GLYMA_08G268000		GLYMA_10G249600
GLYMA_01G186700	GLYMA_08G254600	GLYMA_07G084200	GLYMA_03G167700	GLYMA_10G247600	GLYMA_13G283900	GLYMA_19G195300	GLYMA_06G019000	GLYMA_15G114700	GLYMA_01G037200		GLYMA_01G186700		GLYMA_06G142300
GLYMA_02G045900	GLYMA_09G071300	GLYMA_10G029600	GLYMA_15G211700	GLYMA_15G131600	GLYMA_04G098800	GLYMA_01G168500	GLYMA_19G111000	GLYMA_10G077800	GLYMA_09G008800		GLYMA_02G045900		GLYMA_06G160200
GLYMA_16G188700	GLYMA_06G249800	GLYMA_07G259400	GLYMA_16G126500	GLYMA_13G094100	GLYMA_18G127400	GLYMA_13G069900	GLYMA_06G290300	GLYMA_01G035000	GLYMA_19G234100		GLYMA_16G188700		GLYMA_04G216100
GLYMA_13G303700	GLYMA_18G043800	GLYMA_04G255500	GLYMA_15G159300	GLYMA_07G015400	GLYMA_06G049500	GLYMA_06G166500	GLYMA_03G141800	GLYMA_16G021700	GLYMA_12G108500		GLYMA_13G303700		GLYMA_09G087300
GLYMA_18G043800	GLYMA_15G052000	GLYMA_14G037100	GLYMA_13G237100	GLYMA_12G149500	GLYMA_02G283400	GLYMA_06G113500	GLYMA_01G031300	GLYMA_09G039800	GLYMA_08G336300		GLYMA_18G043800		GLYMA_11G092900
GLYMA_04G023000	GLYMA_09G247700	GLYMA_19G184900	GLYMA_08G056700	GLYMA_18G048400	GLYMA_18G049500	GLYMA_16G041800	GLYMA_02G271000	GLYMA_19G168700	GLYMA_15G061700		GLYMA_04G023000		GLYMA_11G166900
GLYMA_08G344300	GLYMA_07G144700	GLYMA_09G184000	GLYMA_11G164800	GLYMA_10G004700	GLYMA_09G031600	GLYMA_05G014900	GLYMA_18G015900	GLYMA_14G007000	GLYMA_11G139800		GLYMA_08G344300		GLYMA_13G215400
GLYMA_14G052500	GLYMA_02G283400	GLYMA_06G202200	GLYMA_17G255200	GLYMA_19G013000	GLYMA_11G220300	GLYMA_09G012400	GLYMA_11G164000	GLYMA_06G052800	GLYMA_17G008000		GLYMA_14G052500		GLYMA_02G034700
GLYMA_13G307000	GLYMA_19G249800	GLYMA_14G003600	GLYMA_03G145500	GLYMA_06G324200	GLYMA_11G253200	GLYMA_19G001400	GLYMA_15G267000	GLYMA_19G110600	GLYMA_08G358600		GLYMA_13G307000		GLYMA_07G271200
GLYMA_18G006800	GLYMA_09G259500	GLYMA_15G131600	GLYMA_04G205100	GLYMA_13G219200	GLYMA_04G220700	GLYMA_14G016800	GLYMA_02G080700	GLYMA_03G101000	GLYMA_06G141400		GLYMA_18G006800		GLYMA_03G144800
GLYMA_18G260500	GLYMA_18G152800	GLYMA_18G213000	GLYMA_04G221700	GLYMA_17G044700	GLYMA_08G329600	GLYMA_02G261400	GLYMA_07G132100	GLYMA_08G227200	GLYMA_02G203300		GLYMA_18G260500		GLYMA_14G031200
GLYMA_08G032900	GLYMA_07G261800	GLYMA_18G009900	GLYMA_04G255500	GLYMA_01G124500	GLYMA_16G151200	GLYMA_01G190000	GLYMA_14G053700	GLYMA_18G277500	GLYMA_04G215000		GLYMA_08G032900		GLYMA_11G254700
GLYMA_20G062500	GLYMA_13G147700	GLYMA_03G192200	GLYMA_02G059500	GLYMA_08G251900	GLYMA_05G042400	GLYMA_U044100	GLYMA_06G319200	GLYMA_04G246600	GLYMA_18G082800		GLYMA_20G062500		GLYMA_03G071700
GLYMA_17G111100	GLYMA_19G032100	GLYMA_06G270400	GLYMA_09G239700	GLYMA_12G108500	GLYMA_17G139000	GLYMA_11G164800	GLYMA_05G007600	GLYMA_06G027200	GLYMA_10G129500		GLYMA_17G111100		GLYMA_01G058400
GLYMA_07G088000	GLYMA_14G031200	GLYMA_14G074800	GLYMA_13G069900	GLYMA_10G138200	GLYMA_10G071000	GLYMA_16G061400	GLYMA_07G159700	GLYMA_11G008300	GLYMA_11G253200		GLYMA_07G088000		GLYMA_13G262700
GLYMA_10G154100	GLYMA_16G017400	GLYMA_12G070700	GLYMA_14G053900	GLYMA_16G056300	GLYMA_13G264400	GLYMA_09G043400	GLYMA_08G358600	GLYMA_16G181900	GLYMA_11G104200		GLYMA_10G154100		GLYMA_19G035800
GLYMA_10G031200	GLYMA_14G216000	GLYMA_18G148000	GLYMA_05G008300	GLYMA_02G002100	GLYMA_15G089100	GLYMA_18G266200	GLYMA_11G143800	GLYMA_07G155200	GLYMA_20G148000		GLYMA_10G031200		GLYMA_06G122700
GLYMA_14G029900	GLYMA_14G097000	GLYMA_15G270900	GLYMA_09G112100	GLYMA_15G149000	GLYMA_16G200400	GLYMA_03G211700	GLYMA_07G078200	GLYMA_20G147200	GLYMA_11G052200		GLYMA_14G029900		GLYMA_01G127400
GLYMA_13G160400	GLYMA_02G069700	GLYMA_01G074200	GLYMA_14G220100	GLYMA_05G004800	GLYMA_03G144700	GLYMA_13G342000	GLYMA_14G068300	GLYMA_01G098700	GLYMA_15G032300		GLYMA_13G160400		GLYMA_11G048200
GLYMA_04G001100	GLYMA_15G229400	GLYMA_14G176300	GLYMA_09G043900	GLYMA_08G118100	GLYMA_10G067100	GLYMA_17G086500	GLYMA_02G107400	GLYMA_03G217500	GLYMA_13G233900		GLYMA_04G001100		GLYMA_08G073300
GLYMA_15G243000	GLYMA_11G127700	GLYMA_04G060800	GLYMA_10G200800	GLYMA_17G260300	GLYMA_01G072800	GLYMA_19G055400	GLYMA_18G154200	GLYMA_20G234100	GLYMA_07G107200		GLYMA_15G243000		GLYMA_17G017200
GLYMA_07G266700	GLYMA_06G171800	GLYMA_03G217500	GLYMA_01G208000	GLYMA_18G058000	GLYMA_08G308000	GLYMA_08G036200	GLYMA_12G164900	GLYMA_13G160400	GLYMA_16G201900		GLYMA_07G266700		GLYMA_03G018800
GLYMA_09G022400	GLYMA_03G132700	GLYMA_19G168700	GLYMA_08G198900	GLYMA_13G122100	GLYMA_08G216600	GLYMA_07G096500	GLYMA_09G039000	GLYMA_09G268800	GLYMA_17G105400		GLYMA_09G022400		GLYMA_04G184500
GLYMA_16G124700	GLYMA_20G050500	GLYMA_19G151400	GLYMA_19G215600	GLYMA_19G144500	GLYMA_05G050400	GLYMA_13G283900	GLYMA_10G283700	GLYMA_14G221200	GLYMA_12G186200		GLYMA_16G124700		GLYMA_07G248100
ENSRNA050002333	GLYMA_17G223400	GLYMA_18G091300	GLYMA_15G005600	GLYMA_13G214400	GLYMA_09G029400	GLYMA_02G156000	GLYMA_17G060400	GLYMA_13G304900	GLYMA_20G196100		ENSRNA050002333		GLYMA_15G114700
GLYMA_02G272100	GLYMA_10G103100	GLYMA_01G160300	GLYMA_02G080700	GLYMA_13G214500	GLYMA_02G145100	GLYMA_14G133100	GLYMA_08G341100	GLYMA_11G219600	GLYMA_05G072200		GLYMA_02G272100		GLYMA_19G014500
GLYMA_02G126100	GLYMA_08G131000	GLYMA_20G027900	GLYMA_16G124700	GLYMA_19G150700	GLYMA_05G215500	GLYMA_18G274200	GLYMA_20G049800	GLYMA_05G140700	GLYMA_04G223200		GLYMA_02G126100		GLYMA_04G200500
GLYMA_09G029400	GLYMA_13G305400	GLYMA_04G098800	GLYMA_19G101300	GLYMA_06G035700	GLYMA_12G023800	GLYMA_02G239000	GLYMA_08G200100	GLYMA_05G050400	GLYMA_07G159700		GLYMA_09G029400		GLYMA_05G233300
GLYMA_10G050400	GLYMA_17G166900	GLYMA_08G341100	GLYMA_01G137200	GLYMA_13G251100	GLYMA_18G077000	GLYMA_06G296300	GLYMA_02G189700	GLYMA_15G040100	GLYMA_09G270900		GLYMA_10G050400		GLYMA_20G089900
GLYMA_06G006100	GLYMA_06G299700	GLYMA_10G195200	GLYMA_09G069900	GLYMA_17G233200	GLYMA_06G235000	GLYMA_19G004400	GLYMA_20G165100	GLYMA_20G135400	GLYMA_02G104500		GLYMA_06G006100		GLYMA_06G125200
GLYMA_10G182800	GLYMA_07G210100	GLYMA_13G165600	GLYMA_18G077000	GLYMA_08G175300	GLYMA_01G182100	GLYMA_07G259400	GLYMA_16G133000	GLYMA_09G239100	GLYMA_12G171100		GLYMA_10G182800		GLYMA_01G120400
GLYMA_13G094100	GLYMA_20G033900	GLYMA_20G131100	GLYMA_11G256500	GLYMA_20G049800	GLYMA_13G108500	GLYMA_09G237000	GLYMA_11G232000	GLYMA_15G089000	GLYMA_20G137700		GLYMA_13G094100		GLYMA_13G241200
GLYMA_20G138500	GLYMA_01G132600	GLYMA_01G108200	GLYMA_10G077800	GLYMA_11G246300	GLYMA_11G140500	GLYMA_14G224000	GLYMA_09G028700	GLYMA_15G144700	GLYMA_03G110600		GLYMA_20G138500		GLYMA_06G297400
GLYMA_04G205100	GLYMA_15G063500	GLYMA_15G055800	GLYMA_06G264700	GLYMA_05G202100	GLYMA_16G181600	GLYMA_15G125000	GLYMA_13G306900	GLYMA_02G045900	GLYMA_06G210200		GLYMA_04G205100		GLYMA_02G267800
GLYMA_17G020900	GLYMA_20G231800	GLYMA_17G086500	GLYMA_06G149500	GLYMA_13G052900	GLYMA_15G058300	GLYMA_01G042600	GLYMA_15G055800	GLYMA_09G008800	GLYMA_14G113100		GLYMA_17G020900		GLYMA_03G130300
GLYMA_17G262300	GLYMA_01G030900	GLYMA_12G122600	GLYMA_02G050100	GLYMA_06G184100	GLYMA_11G068700	GLYMA_08G284800	GLYMA_11G078500	GLYMA_10G250200	GLYMA_19G221000		GLYMA_17G262300		GLYMA_16G206400
GLYMA_01G020400	GLYMA_11G256100	GLYMA_09G039000	GLYMA_03G031600	GLYMA_07G107200	GLYMA_17G127200	GLYMA_07G260600	GLYMA_19G014500	GLYMA_17G227400	GLYMA_02G237100		GLYMA_01G020400		GLYMA_09G015900
GLYMA_08G028800	GLYMA_06G004500	GLYMA_06G223600	GLYMA_11G241900	GLYMA_07G250600	GLYMA_01G125800	GLYMA_03G206000	GLYMA_19G195300	GLYMA_02G252600	GLYMA_04G179400		GLYMA_08G028800		GLYMA_16G200400
GLYMA_19G239800	GLYMA_19G222500	GLYMA_04G223000	GLYMA_18G147000	GLYMA_12G064300	GLYMA_13G278400	GLYMA_06G294500	GLYMA_19G164900	GLYMA_14G181800	GLYMA_16G169400		GLYMA_19G239800		GLYMA_14G127800
GLYMA_13G056500	GLYMA_11G208800	GLYMA_01G159700	GLYMA_16G109300	GLYMA_06G041300	GLYMA_13G339800	GLYMA_19G203500	GLYMA_09G136400	GLYMA_14G087400	GLYMA_16G145200		GLYMA_13G056500		GLYMA_01G220600
GLYMA_06G113500	GLYMA_19G247800	GLYMA_10G099800	GLYMA_08G267000	GLYMA_03G206000	GLYMA_03G139500	GLYMA_10G247300	GLYMA_10G103100	GLYMA_14G047200	GLYMA_13G151800		GLYMA_06G113500		GLYMA_20G114900
GLYMA_01G072800	GLYMA_06G294500	GLYMA_13G251100	GLYMA_17G075100	GLYMA_14G003600	GLYMA_15G069900	GLYMA_03G165300	GLYMA_11G044700	GLYMA_13G061800	GLYMA_04G238300		GLYMA_01G072800		GLYMA_17G152800
GLYMA_15G133900	GLYMA_07G011800	GLYMA_04G039600	GLYMA_11G058200	GLYMA_04G255500	GLYMA_08G213100	GLYMA_15G228900	GLYMA_02G157700	GLYMA_03G192200	GLYMA_12G095100		GLYMA_15G133900		GLYMA_04G074500
GLYMA_19G001400	GLYMA_04G025300	GLYMA_09G008800	GLYMA_13G059700	GLYMA_20G217600	GLYMA_12G171100	GLYMA_19G144400	GLYMA_19G041000	GLYMA_06G117800	GLYMA_19G055400		GLYMA_19G001400		GLYMA_10G053000
GLYMA_14G133100	GLYMA_16G124700	GLYMA_10G236800	GLYMA_09G134100	GLYMA_14G053900	GLYMA_03G129300	GLYMA_01G160300	GLYMA_12G100600	GLYMA_11G140500	GLYMA_16G217000		GLYMA_14G133100		GLYMA_19G119200
GLYMA_16G034300	GLYMA_13G214400	GLYMA_04G191200	GLYMA_16G206900	GLYMA_19G175500	GLYMA_15G011000	GLYMA_18G025300	GLYMA_12G011500	GLYMA_20G033900	GLYMA_16G175100		GLYMA_16G034300		GLYMA_05G070200
GLYMA_08G307400	GLYMA_15G181800	GLYMA_10G035700	GLYMA_04G177800	GLYMA_10G166300	GLYMA_03G101000	GLYMA_20G015900	GLYMA_13G299800	GLYMA_11G243400	GLYMA_04G250100		GLYMA_08G307400		GLYMA_01G193700
GLYMA_10G189700	GLYMA_18G211800	GLYMA_11G208600	GLYMA_18G275300	GLYMA_04G239500	GLYMA_17G123400	GLYMA_05G214900	GLYMA_11G092600	GLYMA_03G130300	GLYMA_08G192000		GLYMA_10G189700		GLYMA_11G029500
GLYMA_18G271600	GLYMA_18G225100	GLYMA_07G009900	GLYMA_09G124100	GLYMA_07G086700	GLYMA_14G068300	GLYMA_13G294800	GLYMA_17G233200	GLYMA_02G293700	GLYMA_11G095000		GLYMA_18G271600		GLYMA_15G248300
GLYMA_04G198300	GLYMA_07G056100	GLYMA_04G026700	GLYMA_05G216300	GLYMA_18G009900	GLYMA_08G107300	GLYMA_13G306900	GLYMA_13G150100	GLYMA_17G015400	GLYMA_17G223400		GLYMA_04G198300		GLYMA_15G181800
GLYMA_09G068700	GLYMA_08G017700	GLYMA_16G167300	GLYMA_02G048700	GLYMA_16G138600	GLYMA_13G114200	GLYMA_04G221700	GLYMA_18G266200	GLYMA_03G217700	GLYMA_19G137500		GLYMA_09G068700		GLYMA_07G237500
GLYMA_15G131600	GLYMA_17G210500	GLYMA_03G190400	GLYMA_17G178300	GLYMA_18G285100	GLYMA_10G250200	GLYMA_15G149600	GLYMA_16G139400	GLYMA_16G152600	GLYMA_02G124700		GLYMA_15G131600		GLYMA_18G245700
GLYMA_15G073400	GLYMA_06G049500	GLYMA_17G111100	GLYMA_11G174100	GLYMA_18G152500	GLYMA_08G229100	GLYMA_18G269700	GLYMA_09G068700	GLYMA_09G022500	GLYMA_14G176800		GLYMA_15G073400		GLYMA_17G220900
GLYMA_18G094300	GLYMA_13G288500	GLYMA_11G092600	GLYMA_19G224500	GLYMA_16G179100	GLYMA_08G195100	GLYMA_06G237400	GLYMA_01G132700	GLYMA_06G324200	GLYMA_01G210400		GLYMA_18G094300		GLYMA_10G058900
GLYMA_18G269700	GLYMA_06G113500	GLYMA_13G148700	GLYMA_06G285700	GLYMA_15G159400	GLYMA_02G219800	GLYMA_15G117000	GLYMA_19G214100	GLYMA_19G137500	GLYMA_10G019000		GLYMA_18G269700		GLYMA_19G141200
GLYMA_18G077000	GLYMA_16G145200	GLYMA_18G271300	GLYMA_10G152300	GLYMA_03G154000	GLYMA_07G020900	GLYMA_09G184000	GLYMA_04G252700	GLYMA_01G243200	GLYMA_17G030100		GLYMA_18G077000		GLYMA_08G329900
GLYMA_02G208200	GLYMA_17G229000	GLYMA_01G129100	GLYMA_14G004800	GLYMA_08G308000	GLYMA_05G085400	GLYMA_08G227400	GLYMA_12G097800	GLYMA_13G255800	GLYMA_10G031200		GLYMA_02G208200		GLYMA_13G362200
GLYMA_16G145200	GLYMA_16G126400	GLYMA_13G184100	GLYMA_13G250900	GLYMA_19G171000	GLYMA_02G237100	GLYMA_11G220300	GLYMA_03G047100	GLYMA_08G017700	GLYMA_05G049300		GLYMA_16G145200		GLYMA_09G022000
ENSRNA050002080	GLYMA_10G029300	GLYMA_14G090300	GLYMA_19G147800	GLYMA_13G255000	GLYMA_03G249000	GLYMA_09G039000	GLYMA_11G012400	GLYMA_07G116700	GLYMA_02G280100		ENSRNA050002080		GLYMA_02G308300
ENSRNA050002918	GLYMA_16G181900	GLYMA_02G261400	GLYMA_02G114100	GLYMA_09G073400	GLYMA_15G056000	GLYMA_07G050000	GLYMA_10G026800	GLYMA_14G037100	GLYMA_02G069700		ENSRNA050002918		GLYMA_17G016600
GLYMA_10G052100	GLYMA_19G111700	GLYMA_04G239400	GLYMA_01G170200	GLYMA_11G097800	GLYMA_18G077900	GLYMA_01G022300	GLYMA_17G198700	GLYMA_10G052200	GLYMA_10G178100		GLYMA_10G052100		GLYMA_02G110300
GLYMA_17G065100	GLYMA_02G056000	GLYMA_18G266200	GLYMA_18G281400	GLYMA_04G023000	GLYMA_11G032200	GLYMA_13G160500	GLYMA_20G145300	GLYMA_20G154400	GLYMA_05G028700		GLYMA_17G065100		GLYMA_05G050200
GLYMA_10G250200	GLYMA_18G043900	GLYMA_13G256600	GLYMA_17G220900	GLYMA_10G026800	GLYMA_15G100900	GLYMA_12G097800	GLYMA_03G252500	GLYMA_01G191600	GLYMA_11G214500		GLYMA_10G250200		GLYMA_02G182400
GLYMA_01G091900	GLYMA_05G210900	GLYMA_14G220100	GLYMA_16G153600	GLYMA_11G146600	GLYMA_05G075100	GLYMA_02G309300	GLYMA_20G232000	GLYMA_03G008100	GLYMA_15G034600		GLYMA_01G091900		GLYMA_12G056700
GLYMA_01G124700	GLYMA_04G137600	GLYMA_18G041300	GLYMA_15G243000	GLYMA_05G226100	GLYMA_14G221200	GLYMA_02G016500	GLYMA_18G205800	GLYMA_08G017300	GLYMA_16G128800		GLYMA_01G124700		GLYMA_20G130400
GLYMA_17G131200	GLYMA_12G181000	GLYMA_09G170500	GLYMA_20G129200	GLYMA_08G100400	GLYMA_19G253500	GLYMA_14G052000	GLYMA_13G173100	GLYMA_01G137000	GLYMA_19G151400		GLYMA_17G131200		GLYMA_11G213100
GLYMA_13G299000	GLYMA_10G195200	GLYMA_03G138300	GLYMA_11G040300	GLYMA_19G168900	GLYMA_13G233900	GLYMA_02G292100	GLYMA_08G251500	GLYMA_09G200800	GLYMA_14G055900		GLYMA_13G299000		GLYMA_03G101000
GLYMA_15G055800	GLYMA_19G214100	GLYMA_13G342000	GLYMA_18G286700	GLYMA_03G149300	GLYMA_13G354900	GLYMA_20G162200	GLYMA_18G259600	GLYMA_04G191200	GLYMA_12G099300		GLYMA_15G055800		GLYMA_12G215700
GLYMA_10G043800	GLYMA_18G099500	GLYMA_05G188600	GLYMA_05G082700	GLYMA_17G096500	GLYMA_02G108600	GLYMA_18G278100	GLYMA_06G049800	GLYMA_16G152300	GLYMA_14G042900		GLYMA_10G043800		GLYMA_11G087800
GLYMA_02G235700	GLYMA_11G166900	GLYMA_17G020900	GLYMA_11G073100	GLYMA_06G289900	GLYMA_14G048400	GLYMA_08G341100	GLYMA_01G224400	GLYMA_09G138100	GLYMA_02G283400		GLYMA_02G235700		GLYMA_13G089500
GLYMA_08G011700	GLYMA_06G061200	GLYMA_08G227400	GLYMA_04G216200	GLYMA_16G061400	GLYMA_06G105200	GLYMA_15G055800	GLYMA_11G055300	GLYMA_12G064300	GLYMA_14G097000		GLYMA_08G011700		GLYMA_08G015300
ENSRNA050000508	GLYMA_09G029400	GLYMA_18G006800	GLYMA_07G110000	GLYMA_15G109900	GLYMA_11G143100	GLYMA_14G048400	GLYMA_13G253200	GLYMA_06G125800	GLYMA_06G067000		ENSRNA050000508		GLYMA_06G083600
GLYMA_15G061700	GLYMA_14G190600	GLYMA_11G045800	GLYMA_05G234500	GLYMA_06G296300	GLYMA_01G049400	GLYMA_15G150100	GLYMA_02G051300	GLYMA_14G003600	GLYMA_08G243100		GLYMA_15G061700		GLYMA_16G018500
GLYMA_05G218300	GLYMA_13G294800	GLYMA_14G029900	GLYMA_16G188800	GLYMA_08G308300	GLYMA_01G036000	GLYMA_20G142100	GLYMA_09G018100	GLYMA_15G024600	GLYMA_03G130300		GLYMA_05G218300		GLYMA_13G147700
GLYMA_05G049300	GLYMA_04G001100	GLYMA_20G201200	GLYMA_06G171700	GLYMA_17G170200	GLYMA_19G017000	GLYMA_11G238800	GLYMA_10G136700	GLYMA_10G067100	GLYMA_19G198700		GLYMA_05G049300		GLYMA_11G059200
GLYMA_10G154200	GLYMA_09G100100	GLYMA_17G138500	GLYMA_06G269200	GLYMA_09G200800	GLYMA_07G136500	GLYMA_14G037100	GLYMA_12G105600	GLYMA_11G244900	GLYMA_13G049700		GLYMA_10G154200		GLYMA_12G224600
GLYMA_09G263100	GLYMA_13G045100	GLYMA_10G265200	GLYMA_12G237600	GLYMA_04G047600	GLYMA_09G028400	GLYMA_08G115400	GLYMA_14G090300	GLYMA_18G141900	GLYMA_02G265900		GLYMA_09G263100		GLYMA_04G252600
GLYMA_20G203100	GLYMA_15G234300	GLYMA_09G201900	GLYMA_01G239800	GLYMA_04G223600	GLYMA_20G203000	GLYMA_02G261900	GLYMA_17G011800	GLYMA_03G168200	GLYMA_10G063000		GLYMA_20G203100		GLYMA_02G018900
GLYMA_20G176600	GLYMA_07G033200	GLYMA_13G094100	GLYMA_16G216800	GLYMA_19G219800	GLYMA_06G061200	GLYMA_03G168200	GLYMA_18G108700	GLYMA_01G004200	GLYMA_01G036800		GLYMA_20G176600		GLYMA_20G135400
GLYMA_09G145700	GLYMA_18G245100	GLYMA_03G259200	GLYMA_16G053000	GLYMA_08G039300	GLYMA_15G201700	GLYMA_03G154200	GLYMA_15G144100	GLYMA_01G217400	GLYMA_06G137600		GLYMA_09G145700		GLYMA_17G138300
GLYMA_18G261800	GLYMA_06G105200	GLYMA_11G037200	GLYMA_08G305600	GLYMA_18G266200	GLYMA_14G127800	GLYMA_18G186900	GLYMA_02G010600	GLYMA_01G166300	GLYMA_10G154200		GLYMA_18G261800		GLYMA_01G187400
GLYMA_01G243200	GLYMA_20G131100	GLYMA_08G033000	GLYMA_01G035000	GLYMA_17G046000	GLYMA_02G202500	GLYMA_06G107600	GLYMA_18G040200	GLYMA_20G212100	GLYMA_18G278100		GLYMA_01G243200		GLYMA_09G001700
GLYMA_02G259200	GLYMA_20G135400	GLYMA_13G048100	GLYMA_14G099300	GLYMA_18G012600	GLYMA_08G038200	GLYMA_09G025500	GLYMA_09G128600	GLYMA_05G149700	GLYMA_04G252700		GLYMA_02G259200		GLYMA_02G269000
GLYMA_13G176000	GLYMA_02G235900	GLYMA_14G197500	GLYMA_13G045100	GLYMA_11G219400	GLYMA_02G017100	GLYMA_18G094300	GLYMA_07G205700	GLYMA_19G144500	GLYMA_02G048700		GLYMA_13G176000		GLYMA_13G124700
GLYMA_20G080800	GLYMA_U001200	GLYMA_18G057200	GLYMA_20G154500	GLYMA_16G126400	GLYMA_18G006800	GLYMA_01G124500	GLYMA_01G160300	GLYMA_14G154200	GLYMA_10G045500		GLYMA_20G080800		GLYMA_05G056100
GLYMA_13G049700	GLYMA_09G161400	GLYMA_17G078700	GLYMA_18G154200	GLYMA_19G128400	GLYMA_11G221000	GLYMA_11G044400	GLYMA_19G240300	GLYMA_10G011500	GLYMA_05G215500		GLYMA_13G049700		GLYMA_07G058100
GLYMA_14G055900	GLYMA_13G243800	GLYMA_07G155200	GLYMA_13G355600	GLYMA_13G176500	GLYMA_14G031200	GLYMA_12G179700	GLYMA_18G012300	GLYMA_05G197100	GLYMA_15G003900		GLYMA_14G055900		GLYMA_16G169700
GLYMA_13G123100	GLYMA_16G023500	GLYMA_02G007400	GLYMA_03G162600	GLYMA_15G196300	GLYMA_14G053100	GLYMA_04G026700	GLYMA_14G224000	GLYMA_14G150600	GLYMA_11G238800		GLYMA_13G123100		GLYMA_09G038200
GLYMA_06G196600	GLYMA_03G016400	GLYMA_13G173100	GLYMA_07G141600	GLYMA_09G025500	GLYMA_05G156400	GLYMA_10G004700	GLYMA_08G366700	GLYMA_13G202100	GLYMA_15G237600		GLYMA_06G196600		GLYMA_07G016300
GLYMA_18G278100	GLYMA_07G083200	GLYMA_04G022100	GLYMA_13G110900	GLYMA_16G165600	GLYMA_19G033800	GLYMA_03G071700	GLYMA_05G188600	GLYMA_13G165600	GLYMA_11G242500		GLYMA_18G278100		GLYMA_05G100400
GLYMA_09G031600	GLYMA_11G044400	GLYMA_07G133800	GLYMA_09G115700	GLYMA_19G207000	GLYMA_06G114200	GLYMA_06G124400	GLYMA_08G017300	GLYMA_13G356000	GLYMA_02G128000		GLYMA_09G031600		GLYMA_18G059300
GLYMA_11G146600	GLYMA_19G046000	GLYMA_09G273800	GLYMA_19G050000	GLYMA_02G080700	GLYMA_13G243800	GLYMA_17G139000	GLYMA_13G306600	GLYMA_09G256100	GLYMA_09G028700		GLYMA_11G146600		GLYMA_18G031800
GLYMA_15G201700	GLYMA_12G240000	GLYMA_13G250900	GLYMA_05G081600	GLYMA_15G032300	GLYMA_09G155700	GLYMA_08G028800	GLYMA_04G238400	GLYMA_20G183800	GLYMA_20G217600		GLYMA_15G201700		GLYMA_10G139300
GLYMA_08G308300	GLYMA_16G200400	GLYMA_19G204900	GLYMA_10G056600	GLYMA_14G173600	GLYMA_03G110600	GLYMA_13G358600	GLYMA_16G113000	GLYMA_05G085400	GLYMA_17G131200		GLYMA_08G308300		GLYMA_05G156400
GLYMA_10G099800	GLYMA_10G026800	GLYMA_13G350400	GLYMA_20G239900	GLYMA_15G002200	GLYMA_20G089900	GLYMA_20G212100	GLYMA_13G208100	GLYMA_08G239400	GLYMA_20G006600		GLYMA_10G099800		GLYMA_04G196100
GLYMA_02G252600	GLYMA_20G210900	GLYMA_06G043900	GLYMA_19G171000	GLYMA_17G255200	GLYMA_02G046200	GLYMA_01G186700	GLYMA_07G241400	GLYMA_11G221000	GLYMA_02G252600		GLYMA_02G252600		GLYMA_10G065600
GLYMA_13G031500	GLYMA_13G306300	GLYMA_20G147700	GLYMA_01G241800	GLYMA_13G202100	GLYMA_05G119300	GLYMA_02G126600	GLYMA_10G189400	GLYMA_08G251900	GLYMA_19G147800		GLYMA_13G031500		GLYMA_11G166500
GLYMA_02G056600	GLYMA_02G059500	GLYMA_03G197300	GLYMA_19G176500	GLYMA_11G124200	GLYMA_20G058900	GLYMA_18G108700	GLYMA_08G007800	GLYMA_12G018900	GLYMA_01G071300		GLYMA_02G056600		GLYMA_13G110800
GLYMA_06G105100	GLYMA_18G006800	GLYMA_16G041800	GLYMA_10G241700	GLYMA_04G060800	GLYMA_07G133800	GLYMA_08G287500	GLYMA_05G215500	GLYMA_16G178800	GLYMA_16G181900		GLYMA_06G105100		GLYMA_14G150600
GLYMA_15G002300	GLYMA_19G144400	GLYMA_15G025400	GLYMA_13G222000	GLYMA_14G128700	GLYMA_10G053000	GLYMA_09G273400	GLYMA_01G180400	GLYMA_08G308000	GLYMA_03G168200		GLYMA_15G002300		GLYMA_04G104500
GLYMA_07G027300	GLYMA_20G217100	GLYMA_13G350300	GLYMA_06G125700	GLYMA_03G252800	GLYMA_19G221000	GLYMA_03G138900	GLYMA_08G003400	GLYMA_12G197600	GLYMA_04G250900		GLYMA_07G027300		GLYMA_05G175500
GLYMA_05G188700	GLYMA_06G044500	GLYMA_08G300300	GLYMA_06G307600	GLYMA_01G216600	GLYMA_05G241900	GLYMA_09G131500	GLYMA_01G106900	GLYMA_05G070600	GLYMA_17G060200		GLYMA_05G188700		GLYMA_10G028900
GLYMA_18G078000	GLYMA_02G148200	GLYMA_06G179900	GLYMA_03G217800	GLYMA_15G032200	GLYMA_07G183900	GLYMA_04G173200	GLYMA_16G053000	GLYMA_06G116100	GLYMA_13G202100		GLYMA_18G078000		GLYMA_10G006500
GLYMA_02G048700	GLYMA_17G047200	GLYMA_16G012700	GLYMA_01G229600	GLYMA_11G074900	GLYMA_20G232700	GLYMA_02G043200	GLYMA_18G121400	GLYMA_08G191900	GLYMA_07G218900		GLYMA_02G048700		GLYMA_10G277200
GLYMA_11G068700	GLYMA_14G091500	GLYMA_16G017400	GLYMA_03G211700	GLYMA_13G173100	GLYMA_09G138300	GLYMA_03G041200	GLYMA_01G159700	GLYMA_03G153600	GLYMA_09G016400		GLYMA_11G068700		GLYMA_02G227700
GLYMA_20G162200	GLYMA_06G157900	GLYMA_06G125700	GLYMA_12G044700	GLYMA_16G041800	GLYMA_13G094100	GLYMA_15G131600	GLYMA_16G165600	GLYMA_11G044700	GLYMA_07G078800		GLYMA_20G162200		GLYMA_16G201000
GLYMA_18G245100	GLYMA_01G182100	GLYMA_02G063400	GLYMA_12G004700	GLYMA_15G025400	GLYMA_18G288800	GLYMA_18G048400	GLYMA_15G032300	GLYMA_08G200100	GLYMA_15G048500		GLYMA_18G245100		GLYMA_05G166900
GLYMA_01G168500	GLYMA_06G119000	GLYMA_10G288400	GLYMA_11G060400	GLYMA_06G072400	GLYMA_13G101200	GLYMA_10G011500	GLYMA_12G023200	GLYMA_08G144400	GLYMA_09G029400		GLYMA_01G168500		GLYMA_08G043800
GLYMA_13G133200	GLYMA_02G200600	GLYMA_06G318200	GLYMA_18G071400	GLYMA_06G137600	GLYMA_14G156800	GLYMA_19G137500	GLYMA_05G014900	GLYMA_11G130900	GLYMA_05G217000		GLYMA_13G133200		GLYMA_05G138100
GLYMA_02G060900	GLYMA_07G116200	GLYMA_13G160400	GLYMA_12G097200	GLYMA_08G030100	GLYMA_06G297400	GLYMA_02G135700	GLYMA_13G062500	GLYMA_01G025200	GLYMA_13G176500		GLYMA_02G060900		GLYMA_18G037900
GLYMA_03G197200	GLYMA_02G148300	GLYMA_05G008300	GLYMA_07G056200	GLYMA_07G019800	GLYMA_03G063000	GLYMA_13G304900	GLYMA_08G158800	GLYMA_02G283400	GLYMA_13G031500		GLYMA_03G197200		GLYMA_02G211700
GLYMA_20G132200	GLYMA_02G259200	GLYMA_10G004700	GLYMA_19G205500	GLYMA_11G044700	GLYMA_11G233500	GLYMA_20G216700	GLYMA_13G214400	GLYMA_20G135500	GLYMA_03G197200		GLYMA_20G132200		GLYMA_17G048700
GLYMA_05G214900	GLYMA_08G021700	GLYMA_01G190000	GLYMA_09G195600	GLYMA_20G184200	GLYMA_15G040100	GLYMA_10G136700	GLYMA_03G157600	GLYMA_01G158000	GLYMA_03G222300		GLYMA_05G214900		GLYMA_02G236500
GLYMA_16G155100	GLYMA_15G130900	GLYMA_12G233500	GLYMA_02G185100	GLYMA_13G032000	GLYMA_16G126400	GLYMA_14G051900	GLYMA_15G131600	GLYMA_05G056300	GLYMA_03G141800		GLYMA_16G155100		GLYMA_13G276700
GLYMA_03G063000	GLYMA_04G031100	GLYMA_11G143100	GLYMA_03G141800	GLYMA_02G093200	GLYMA_07G022400	GLYMA_18G216200	GLYMA_18G082000	GLYMA_03G141800	GLYMA_01G128100		GLYMA_03G063000		GLYMA_14G214300
GLYMA_16G010500	GLYMA_20G234100	GLYMA_07G133700	GLYMA_09G043200	GLYMA_15G012600	GLYMA_20G241700	GLYMA_13G166600	GLYMA_11G256100	GLYMA_07G259400	GLYMA_17G064800		GLYMA_16G010500		GLYMA_20G162000
GLYMA_08G229100	GLYMA_20G189600	GLYMA_06G113500	GLYMA_09G216600	GLYMA_14G133100	GLYMA_04G179400	GLYMA_19G199800	GLYMA_18G225100	GLYMA_01G022300	GLYMA_13G051000		GLYMA_08G229100		GLYMA_13G354400
GLYMA_05G072200	GLYMA_08G011700	GLYMA_11G158800	GLYMA_17G229000	GLYMA_07G261800	GLYMA_14G051800	GLYMA_09G028700	GLYMA_09G067500	GLYMA_06G105100	GLYMA_13G085800		GLYMA_05G072200		GLYMA_05G110200
GLYMA_03G166000	GLYMA_01G174200	GLYMA_04G205100	GLYMA_19G258000	GLYMA_08G341100	GLYMA_04G255500	GLYMA_15G229400	GLYMA_02G065900	GLYMA_06G270400	GLYMA_02G277600		GLYMA_03G166000		GLYMA_09G044100
GLYMA_10G077800	GLYMA_02G100800	GLYMA_19G043000	GLYMA_17G138500	GLYMA_20G137700	GLYMA_11G057800	GLYMA_14G090300	GLYMA_08G180500	GLYMA_11G110900	GLYMA_12G097800		GLYMA_10G077800		GLYMA_14G047500
GLYMA_09G247700	GLYMA_13G040400	GLYMA_13G053300	GLYMA_10G152000	GLYMA_12G004700	GLYMA_13G306600	GLYMA_12G164900	GLYMA_16G126400	GLYMA_19G055400	GLYMA_13G346700		GLYMA_09G247700		GLYMA_10G076100
GLYMA_03G246800	GLYMA_17G138300	GLYMA_19G123500	GLYMA_06G284900	GLYMA_06G088800	GLYMA_06G030500	GLYMA_12G117100	GLYMA_11G184400	GLYMA_17G229000	GLYMA_09G200800		GLYMA_03G246800		GLYMA_12G035700
GLYMA_18G152400	GLYMA_17G108700	GLYMA_03G219200	GLYMA_13G233600	GLYMA_11G174100	GLYMA_15G019300	GLYMA_18G099500	GLYMA_11G255500	GLYMA_15G210500	GLYMA_03G074600		GLYMA_18G152400		GLYMA_10G172900
GLYMA_14G056300	GLYMA_15G176500	GLYMA_17G166900	GLYMA_10G040500	GLYMA_01G036900	GLYMA_16G133400	GLYMA_08G109400	GLYMA_19G140500	GLYMA_14G052600	GLYMA_13G176600		GLYMA_14G056300		GLYMA_01G011300
GLYMA_01G159700	GLYMA_01G071300	GLYMA_02G156000	GLYMA_02G278400	GLYMA_18G267900	GLYMA_15G154900	GLYMA_07G010000	GLYMA_09G281100	GLYMA_13G038600	GLYMA_18G254300		GLYMA_01G159700		GLYMA_15G055600
GLYMA_19G030100	GLYMA_13G051000	GLYMA_13G176500	GLYMA_01G030900	GLYMA_15G211700	GLYMA_06G063700	GLYMA_05G208700	GLYMA_20G152600	GLYMA_19G221000	GLYMA_19G003500		GLYMA_19G030100		GLYMA_13G285800
GLYMA_01G158000	GLYMA_02G051700	GLYMA_15G002200	ENSRNA050000357	GLYMA_13G225100	GLYMA_13G056500	GLYMA_16G216800	GLYMA_08G254400	GLYMA_10G249600	GLYMA_12G096900		GLYMA_01G158000		GLYMA_05G025400
GLYMA_10G290300	GLYMA_13G063800	GLYMA_20G231800	GLYMA_09G022000	GLYMA_01G150000	GLYMA_12G237600	GLYMA_11G055300	GLYMA_08G308000	GLYMA_11G202800	GLYMA_01G232400		GLYMA_10G290300		GLYMA_14G207500
GLYMA_13G369900	GLYMA_13G213800	GLYMA_11G255500	GLYMA_05G151400	GLYMA_04G079400	GLYMA_05G161500	GLYMA_07G078200	GLYMA_08G000700	GLYMA_18G206000	GLYMA_12G116700		GLYMA_13G369900		GLYMA_08G201700
GLYMA_18G082000	GLYMA_18G059300	GLYMA_13G298100	GLYMA_19G082000	GLYMA_02G028200	GLYMA_15G003900	GLYMA_20G197700	GLYMA_09G010700	GLYMA_08G144500	GLYMA_11G140500		GLYMA_18G082000		GLYMA_06G061700
ENSRNA050002075	GLYMA_19G147800	GLYMA_07G078200	GLYMA_04G065800	GLYMA_20G201200	GLYMA_03G130300	GLYMA_15G237600	GLYMA_11G247400	GLYMA_11G220300	GLYMA_18G086900		ENSRNA050002075		GLYMA_03G222300
GLYMA_13G345400	GLYMA_03G145500	GLYMA_04G198300	GLYMA_04G191100	GLYMA_05G232000	GLYMA_02G026300	GLYMA_06G169700	GLYMA_12G171100	GLYMA_19G226000	GLYMA_18G037800		GLYMA_13G345400		GLYMA_17G009800
GLYMA_07G202500	GLYMA_11G110900	GLYMA_08G107400	GLYMA_18G165000	GLYMA_06G294500	GLYMA_04G025300	GLYMA_10G263500	GLYMA_19G216900	GLYMA_01G190000	GLYMA_02G003800		GLYMA_07G202500		GLYMA_10G208800
GLYMA_11G216700	GLYMA_13G110800	GLYMA_11G250000	GLYMA_01G002400	GLYMA_20G191600	GLYMA_14G064600	GLYMA_03G104800	GLYMA_14G174600	GLYMA_18G048000	GLYMA_07G089900		GLYMA_11G216700		GLYMA_10G221700
GLYMA_14G016800	GLYMA_15G133900	GLYMA_18G169200	GLYMA_13G082000	GLYMA_08G079100	GLYMA_12G076700	GLYMA_18G225100	GLYMA_06G271400	GLYMA_06G113400	GLYMA_09G054600		GLYMA_14G016800		GLYMA_07G067300
GLYMA_09G238800	GLYMA_13G059900	GLYMA_19G174900	GLYMA_09G212700	GLYMA_13G342000	GLYMA_11G110900	GLYMA_16G076100	GLYMA_18G043800	GLYMA_13G147700	GLYMA_18G300900		GLYMA_09G238800		GLYMA_12G052500
GLYMA_07G172600	GLYMA_08G286900	GLYMA_15G149000	GLYMA_15G237600	GLYMA_11G073100	GLYMA_18G260500	GLYMA_08G024400	GLYMA_04G240600	GLYMA_07G132100	GLYMA_03G139500		GLYMA_07G172600		GLYMA_02G199300
GLYMA_12G116700	GLYMA_12G191000	ENSRNA050001796	GLYMA_09G029400	GLYMA_13G035600	GLYMA_12G023300	GLYMA_14G034000	GLYMA_20G142900	GLYMA_10G247300	GLYMA_13G310700		GLYMA_12G116700		GLYMA_09G028100
GLYMA_05G050400	GLYMA_08G279600	GLYMA_11G232000	GLYMA_18G269800	GLYMA_14G176300	GLYMA_07G144700	GLYMA_03G196400	GLYMA_13G371500	GLYMA_02G237100	GLYMA_18G295700		GLYMA_05G050400		GLYMA_02G292800
GLYMA_03G138900	GLYMA_02G128000	GLYMA_20G217600	GLYMA_18G095500	GLYMA_14G203400	GLYMA_05G175500	GLYMA_08G251900	GLYMA_02G095600	GLYMA_09G129800	GLYMA_14G096700		GLYMA_03G138900		GLYMA_11G225400
GLYMA_01G036000	GLYMA_18G023500	GLYMA_18G094300	GLYMA_14G051000	GLYMA_03G072300	GLYMA_07G186700	GLYMA_09G256100	GLYMA_08G221600	GLYMA_09G216600	GLYMA_15G113200		GLYMA_01G036000		GLYMA_01G052300
GLYMA_20G213700	GLYMA_01G058400	GLYMA_08G163100	GLYMA_01G205300	GLYMA_20G123000	GLYMA_03G129200	GLYMA_05G188700	GLYMA_18G210900	GLYMA_20G201200	GLYMA_15G221600		GLYMA_20G213700		GLYMA_16G173100
GLYMA_02G203300	GLYMA_03G167400	GLYMA_20G045800	GLYMA_07G052800	GLYMA_08G269300	GLYMA_01G137200	GLYMA_10G259800	GLYMA_10G077800	GLYMA_11G166900	GLYMA_08G062500		GLYMA_02G203300		GLYMA_08G001200
GLYMA_04G246600	GLYMA_18G150600	GLYMA_10G230400	GLYMA_04G060600	GLYMA_15G005600	GLYMA_10G132500	GLYMA_11G073100	GLYMA_04G077200	GLYMA_07G229200	GLYMA_08G078500		GLYMA_04G246600		GLYMA_04G004800
GLYMA_01G224800	GLYMA_02G271000	GLYMA_16G152900	GLYMA_02G102600	GLYMA_14G056300	GLYMA_13G079900	GLYMA_06G284400	GLYMA_07G169400	GLYMA_01G232400	GLYMA_12G137700		GLYMA_01G224800		GLYMA_13G187000
GLYMA_08G330700	GLYMA_18G165000	GLYMA_06G113300	GLYMA_06G077500	GLYMA_08G000700	GLYMA_11G044400	GLYMA_20G231800	GLYMA_15G114700	GLYMA_18G260500	GLYMA_10G250200		GLYMA_08G330700		GLYMA_07G049900
GLYMA_13G051000	GLYMA_13G055100	GLYMA_07G224100	GLYMA_14G028300	GLYMA_07G100800	GLYMA_18G273000	GLYMA_09G239100	GLYMA_06G189900	GLYMA_18G108700	GLYMA_03G107900		GLYMA_13G051000		GLYMA_06G044500
GLYMA_13G215000	GLYMA_13G265500	GLYMA_15G063200	GLYMA_08G239400	GLYMA_04G137600	GLYMA_09G276800	GLYMA_09G181200	GLYMA_08G071400	GLYMA_07G078200	GLYMA_06G123200		GLYMA_13G215000		GLYMA_10G100800
GLYMA_07G210100	GLYMA_09G039000	GLYMA_12G011400	GLYMA_08G207600	GLYMA_01G160300	GLYMA_06G004500	GLYMA_11G219400	GLYMA_02G043200	GLYMA_17G157400	GLYMA_13G076200		GLYMA_07G210100		GLYMA_17G047700
ENSRNA050001204	GLYMA_13G344800	GLYMA_06G072900	GLYMA_07G129900	GLYMA_18G186900	GLYMA_08G312000	GLYMA_11G158800	GLYMA_03G237700	GLYMA_08G032900	GLYMA_12G021800		ENSRNA050001204		GLYMA_05G034000
GLYMA_01G100000	GLYMA_07G159700	GLYMA_13G307000	GLYMA_11G110900	GLYMA_08G201200	GLYMA_05G068400	GLYMA_11G244900	GLYMA_06G096200	GLYMA_04G132700	GLYMA_16G041800		GLYMA_01G100000
GLYMA_08G042000	GLYMA_17G021400	GLYMA_14G224000	GLYMA_16G138400	GLYMA_14G190600	GLYMA_06G124400	GLYMA_15G075300	GLYMA_09G060400	GLYMA_04G252700	GLYMA_11G204800		GLYMA_08G042000
GLYMA_10G011500	GLYMA_08G269000	GLYMA_12G064300	GLYMA_05G248800	GLYMA_11G045800	GLYMA_18G272200	GLYMA_03G148100	GLYMA_12G233500	GLYMA_19G203500	GLYMA_11G008300		GLYMA_10G011500
GLYMA_15G148300	GLYMA_02G176100	GLYMA_09G263100	GLYMA_06G259000	GLYMA_06G284400	GLYMA_08G325600	GLYMA_13G255800	GLYMA_16G181600	GLYMA_09G025500	GLYMA_19G235300		GLYMA_15G148300
GLYMA_20G035200	GLYMA_08G039400	GLYMA_11G059900	GLYMA_15G154900	GLYMA_13G169700	GLYMA_03G041000	GLYMA_06G105100	GLYMA_10G138200	GLYMA_16G206300	GLYMA_09G055700		GLYMA_20G035200
GLYMA_17G086500	GLYMA_11G057800	GLYMA_02G003800	GLYMA_01G243200	GLYMA_16G097800	GLYMA_01G191600	GLYMA_13G304100	GLYMA_09G008800	GLYMA_04G179400	GLYMA_20G207200		GLYMA_17G086500
GLYMA_16G019500	GLYMA_16G113000	GLYMA_14G052600	GLYMA_11G225800	GLYMA_07G271800	GLYMA_15G133900	GLYMA_10G029600	GLYMA_18G165000	GLYMA_13G088300	GLYMA_12G055200		GLYMA_16G019500
GLYMA_08G227400	GLYMA_19G026900	GLYMA_14G028200	GLYMA_13G231000	GLYMA_08G028800	GLYMA_02G218200	GLYMA_13G066600	GLYMA_15G217100	GLYMA_18G043800	GLYMA_13G350300		GLYMA_08G227400
GLYMA_12G055200	GLYMA_16G012700	GLYMA_03G196400	GLYMA_06G154500	GLYMA_07G244400	GLYMA_15G128300	GLYMA_15G089000	GLYMA_20G194900	GLYMA_05G014900	GLYMA_02G202500		GLYMA_12G055200
GLYMA_15G229400	GLYMA_13G233900	GLYMA_07G238400	GLYMA_04G013400	GLYMA_19G043000	GLYMA_13G362800	GLYMA_14G221200	GLYMA_06G113300	GLYMA_15G046900	GLYMA_01G197300		GLYMA_15G229400
GLYMA_14G154200	GLYMA_11G202800	GLYMA_07G218900	GLYMA_01G058400	GLYMA_15G258200	GLYMA_06G202200	GLYMA_02G011500	GLYMA_10G250200	GLYMA_02G034500	GLYMA_13G215000		GLYMA_14G154200
GLYMA_15G170500	GLYMA_08G251900	GLYMA_09G039800	GLYMA_06G196600	GLYMA_14G034000	GLYMA_04G209200	GLYMA_03G056800	GLYMA_15G138000	GLYMA_07G169400	GLYMA_02G285000		GLYMA_15G170500
GLYMA_01G006800	GLYMA_08G109400	GLYMA_02G002600	GLYMA_03G062500	GLYMA_01G239800	GLYMA_12G179700	GLYMA_11G228000	GLYMA_04G071600	GLYMA_06G088800	GLYMA_18G077000		GLYMA_01G006800
GLYMA_03G148100	GLYMA_07G133800	GLYMA_02G239000	GLYMA_18G258700	GLYMA_09G039000	GLYMA_02G001000	GLYMA_04G223000	GLYMA_01G020400	GLYMA_10G236800	GLYMA_20G162200		GLYMA_03G148100
GLYMA_18G068400	GLYMA_19G167200	GLYMA_14G087400	GLYMA_10G229800	GLYMA_02G272100	GLYMA_18G284400	GLYMA_09G237700	GLYMA_12G195900	GLYMA_01G006800	GLYMA_15G134400		GLYMA_18G068400
GLYMA_07G186700	GLYMA_16G034300	GLYMA_01G224800	GLYMA_04G091400	GLYMA_05G129700	GLYMA_08G053700	GLYMA_03G141900	GLYMA_04G028600	GLYMA_08G062500	GLYMA_08G335000		GLYMA_07G186700
GLYMA_02G080700	GLYMA_06G297400	GLYMA_05G129700	GLYMA_03G071700	GLYMA_05G075000	GLYMA_06G084700	GLYMA_15G046500	GLYMA_09G237000	GLYMA_08G180500	GLYMA_14G221400		GLYMA_02G080700
GLYMA_10G288400	GLYMA_07G207400	GLYMA_07G022400	GLYMA_15G181600	GLYMA_02G135700	GLYMA_09G256100	GLYMA_16G178800	GLYMA_09G012400	GLYMA_06G063200	GLYMA_08G021700		GLYMA_10G288400
GLYMA_15G058300	GLYMA_13G224800	GLYMA_09G256100	GLYMA_11G208800	GLYMA_18G152400	GLYMA_07G019800	GLYMA_14G041300	GLYMA_02G296800	GLYMA_10G189400	GLYMA_08G038200		GLYMA_15G058300
GLYMA_16G181600	GLYMA_10G155300	GLYMA_13G035600	GLYMA_05G163400	GLYMA_13G303000	GLYMA_05G056300	GLYMA_12G006500	GLYMA_18G279300	GLYMA_08G213100	GLYMA_13G133200		GLYMA_16G181600
GLYMA_08G003400	GLYMA_02G080700	GLYMA_11G253600	GLYMA_01G120400	GLYMA_17G049500	GLYMA_06G194000	GLYMA_19G249800	GLYMA_03G190400	GLYMA_18G269700	GLYMA_07G079600		GLYMA_08G003400
GLYMA_20G234200	GLYMA_18G037800	GLYMA_13G369900	GLYMA_18G057800	GLYMA_19G235400	GLYMA_10G004700	GLYMA_20G135400	GLYMA_10G257400	GLYMA_03G030300	GLYMA_08G307400		GLYMA_20G234200
GLYMA_18G257900	GLYMA_03G252200	GLYMA_12G195900	GLYMA_19G096200	GLYMA_08G254600	GLYMA_19G032100	GLYMA_10G250200	GLYMA_14G163600	GLYMA_09G028700	GLYMA_14G207900		GLYMA_18G257900
GLYMA_10G237800	GLYMA_11G241900	GLYMA_08G344300	GLYMA_01G071300	GLYMA_08G262700	GLYMA_05G003900	GLYMA_01G181700	GLYMA_10G029300	GLYMA_01G159700	GLYMA_09G188800		GLYMA_10G237800
GLYMA_15G104600	GLYMA_20G176100	GLYMA_14G221200	GLYMA_10G045700	GLYMA_16G017700	GLYMA_05G049900	GLYMA_20G191600	GLYMA_09G047300	GLYMA_14G210600	GLYMA_15G020800		GLYMA_15G104600
GLYMA_17G166900	GLYMA_13G133200	GLYMA_02G107400	GLYMA_14G028000	GLYMA_13G319100	GLYMA_02G093400	GLYMA_13G225100	GLYMA_02G126100	GLYMA_13G079900	GLYMA_10G229800		GLYMA_17G166900
GLYMA_19G061500	GLYMA_08G108200	GLYMA_16G139400	GLYMA_17G047200	GLYMA_03G085500	GLYMA_17G108700	GLYMA_08G306600	GLYMA_14G165000	GLYMA_07G155500	GLYMA_16G220900		GLYMA_19G061500
GLYMA_18G099500	GLYMA_07G256900	GLYMA_17G031500	GLYMA_11G139800	GLYMA_12G001300	GLYMA_13G369900	GLYMA_14G007000	GLYMA_18G284400	GLYMA_10G112800	GLYMA_16G177000		GLYMA_18G099500
GLYMA_12G152100	GLYMA_05G181500	GLYMA_09G012400	GLYMA_13G272500	GLYMA_07G110700	GLYMA_11G052200	GLYMA_06G082300	GLYMA_18G232800	GLYMA_16G192400	GLYMA_10G054200		GLYMA_12G152100
GLYMA_16G139400	GLYMA_15G069900	GLYMA_18G103500	GLYMA_10G028900	GLYMA_03G219200	GLYMA_09G022000	GLYMA_06G088800	GLYMA_09G094400	GLYMA_06G105200	GLYMA_17G233200		GLYMA_16G139400
GLYMA_02G128000	GLYMA_13G356000	GLYMA_19G137500	GLYMA_17G127200	GLYMA_04G252700	GLYMA_09G216600	GLYMA_07G133800	GLYMA_04G132200	GLYMA_11G073100	GLYMA_06G003100		GLYMA_02G128000
GLYMA_01G230000	GLYMA_17G105400	GLYMA_05G188700	GLYMA_09G138100	GLYMA_14G045000	GLYMA_18G295700	GLYMA_07G218900	GLYMA_15G149000	GLYMA_09G138300	GLYMA_19G082000		GLYMA_01G230000
GLYMA_08G155100	GLYMA_14G085500	GLYMA_02G022700	GLYMA_08G216600	GLYMA_10G260800	GLYMA_18G259600	GLYMA_03G145500	GLYMA_08G175300	GLYMA_09G039000	GLYMA_19G167200		GLYMA_08G155100
GLYMA_13G066600	GLYMA_10G066100	GLYMA_08G017700	GLYMA_20G247800	GLYMA_17G048700	GLYMA_01G098700	GLYMA_11G193300	GLYMA_20G151800	GLYMA_15G271000	GLYMA_02G301100		GLYMA_13G066600
GLYMA_14G220600	GLYMA_09G234900	GLYMA_16G053000	GLYMA_02G235700	GLYMA_12G023800	GLYMA_11G207900	GLYMA_08G344300	GLYMA_17G111100	GLYMA_U044100	GLYMA_07G134100		GLYMA_14G220600
GLYMA_10G291700	GLYMA_09G134100	GLYMA_08G158800	GLYMA_03G222300	GLYMA_08G338200	GLYMA_02G241800	GLYMA_12G001300	GLYMA_15G121000	GLYMA_15G150100	GLYMA_07G125100		GLYMA_10G291700
GLYMA_13G165600	GLYMA_09G222200	GLYMA_18G048000	GLYMA_13G257400	GLYMA_04G133400	GLYMA_16G017700	GLYMA_12G064300	GLYMA_06G063200	GLYMA_17G233200	GLYMA_02G185100		GLYMA_13G165600
GLYMA_08G227200	GLYMA_04G200500	GLYMA_13G304100	GLYMA_13G243800	GLYMA_01G100000	GLYMA_18G238000	GLYMA_03G217800	GLYMA_19G207000	GLYMA_06G096200	GLYMA_04G205100		GLYMA_08G227200
GLYMA_07G169400	GLYMA_07G264100	GLYMA_19G110600	GLYMA_17G049800	GLYMA_13G110200	GLYMA_08G254600	GLYMA_15G011700	GLYMA_17G252500	GLYMA_18G213000	GLYMA_15G273700		GLYMA_07G169400
GLYMA_07G099000	GLYMA_14G221200	GLYMA_12G097800	GLYMA_04G098800	GLYMA_02G095600	GLYMA_12G152100	GLYMA_09G010800	GLYMA_09G262100	GLYMA_03G197300	GLYMA_01G085200		GLYMA_07G099000
GLYMA_01G106100	GLYMA_09G272900	GLYMA_16G217000	GLYMA_07G096500	GLYMA_20G132200	GLYMA_08G019000	GLYMA_18G210900	GLYMA_13G169700	GLYMA_09G094000	GLYMA_10G263500		GLYMA_01G106100
GLYMA_13G319100	GLYMA_04G208400	GLYMA_02G299800	GLYMA_01G190000	GLYMA_15G066200	GLYMA_09G222200	GLYMA_13G349300	GLYMA_04G017800	GLYMA_13G362800	GLYMA_07G136500		GLYMA_13G319100
GLYMA_10G136700	GLYMA_03G252700	GLYMA_17G098100	GLYMA_05G161500	GLYMA_08G052400	GLYMA_08G108200	GLYMA_12G171100	GLYMA_15G228900	GLYMA_07G079600	GLYMA_14G210600		GLYMA_10G136700
GLYMA_02G094500	GLYMA_04G030400	GLYMA_07G017000	GLYMA_06G113500	GLYMA_20G038500	GLYMA_17G115300	GLYMA_05G070600	GLYMA_20G132200	GLYMA_10G066100	GLYMA_13G371500		GLYMA_02G094500
GLYMA_20G130200	GLYMA_03G207400	GLYMA_08G132700	GLYMA_14G087400	GLYMA_09G255000	GLYMA_01G120400	GLYMA_11G225800	GLYMA_04G047900	GLYMA_11G233500	GLYMA_15G159400		GLYMA_20G130200
GLYMA_14G090300	GLYMA_05G042400	GLYMA_19G249800	GLYMA_17G022500	GLYMA_03G148100	GLYMA_10G195200	GLYMA_02G264900	GLYMA_19G027400	GLYMA_14G031200	GLYMA_01G125800		GLYMA_14G090300
GLYMA_10G015000	GLYMA_20G203100	GLYMA_07G070200	GLYMA_07G116700	GLYMA_17G098100	GLYMA_15G030100	GLYMA_17G008800	GLYMA_03G259200	GLYMA_15G084600	GLYMA_12G116400		GLYMA_10G015000
GLYMA_12G212600	GLYMA_06G042500	GLYMA_09G010700	GLYMA_02G107400	GLYMA_06G082300	GLYMA_19G111700	GLYMA_04G238300	GLYMA_12G115600	GLYMA_08G198900	GLYMA_16G216800		GLYMA_12G212600
GLYMA_18G147000	GLYMA_17G013400	GLYMA_02G135700	GLYMA_10G076000	GLYMA_11G158800	GLYMA_11G104100	GLYMA_08G032900	GLYMA_06G166500	GLYMA_13G176500	GLYMA_01G166300		GLYMA_18G147000
GLYMA_19G235400	GLYMA_04G206000	GLYMA_08G358400	GLYMA_06G031400	GLYMA_11G158200	GLYMA_12G034200	GLYMA_02G287100	GLYMA_09G255000	GLYMA_14G085500	GLYMA_07G000500		GLYMA_19G235400
GLYMA_12G225700	GLYMA_07G255100	GLYMA_01G124700	GLYMA_17G034900	GLYMA_09G012400	GLYMA_11G056500	GLYMA_06G308100	GLYMA_06G082300	GLYMA_08G114400	GLYMA_06G202200		GLYMA_12G225700
GLYMA_07G133800	GLYMA_12G084000	GLYMA_06G189900	GLYMA_13G056500	GLYMA_11G037300	GLYMA_08G017300	GLYMA_11G255500	GLYMA_19G034900	ENSRNA050030686	GLYMA_13G173100		GLYMA_07G133800
GLYMA_05G028700	GLYMA_20G151800	GLYMA_08G191900	GLYMA_02G007400	GLYMA_09G256100	GLYMA_02G116400	GLYMA_04G255500	GLYMA_17G103300	GLYMA_04G196100	GLYMA_02G148200		GLYMA_05G028700
GLYMA_11G244900	GLYMA_12G187000	GLYMA_17G029500	GLYMA_16G070300	GLYMA_19G249800	GLYMA_18G023500	GLYMA_15G113200	GLYMA_04G079400	GLYMA_02G080800	GLYMA_11G235200		GLYMA_11G244900
GLYMA_03G186900	GLYMA_15G124000	GLYMA_08G210200	GLYMA_07G021200	GLYMA_11G256100	GLYMA_04G004800	GLYMA_16G152900	GLYMA_02G099600	GLYMA_13G196200	GLYMA_05G216900		GLYMA_03G186900
GLYMA_20G015900	GLYMA_06G136100	GLYMA_04G080600	GLYMA_06G315400	GLYMA_18G040200	GLYMA_08G255200	GLYMA_18G152400	GLYMA_11G256500	GLYMA_01G120400	GLYMA_02G296800		GLYMA_20G015900
GLYMA_14G063300	GLYMA_15G181600	GLYMA_19G159200	GLYMA_17G060600	GLYMA_18G205800	GLYMA_02G172800	GLYMA_11G140500	GLYMA_18G138000	GLYMA_16G041800	GLYMA_15G276000		GLYMA_14G063300
GLYMA_13G080500	GLYMA_08G082800	GLYMA_18G152400	GLYMA_02G108800	GLYMA_16G048000	GLYMA_14G047200	GLYMA_09G111500	GLYMA_20G191600	GLYMA_13G354900	GLYMA_02G292700		GLYMA_13G080500
GLYMA_03G259200	GLYMA_05G202100	GLYMA_12G202700	GLYMA_16G017400	ENSRNA050001438	GLYMA_10G154100	GLYMA_07G015400	GLYMA_06G088800	GLYMA_02G135700	GLYMA_09G247700		GLYMA_03G259200
GLYMA_03G173300	GLYMA_08G329600	GLYMA_02G095600	GLYMA_18G295700	GLYMA_11G025000	GLYMA_18G257900	GLYMA_02G259200	GLYMA_15G018700	GLYMA_09G043900	GLYMA_14G011700		GLYMA_03G173300
GLYMA_10G195200	GLYMA_07G056200	GLYMA_08G252700	GLYMA_08G033100	GLYMA_20G156300	GLYMA_16G177000	GLYMA_08G198900	GLYMA_06G072900	GLYMA_07G049900	GLYMA_03G201100		GLYMA_10G195200
GLYMA_09G188200	GLYMA_03G183100	GLYMA_15G202100	GLYMA_14G091500	GLYMA_17G104000	GLYMA_01G216600	GLYMA_11G253600	ENSRNA050030366	GLYMA_17G166900	GLYMA_18G265200		GLYMA_09G188200
GLYMA_09G039000	GLYMA_11G097300	GLYMA_03G217700	GLYMA_03G152500	GLYMA_14G053700	GLYMA_06G307000	GLYMA_11G110700	GLYMA_20G207200	GLYMA_06G136800	GLYMA_08G035900		GLYMA_09G039000
GLYMA_07G136500	GLYMA_10G288400	GLYMA_02G203300	GLYMA_02G266600	GLYMA_19G260900	GLYMA_15G134400	GLYMA_04G098800	GLYMA_14G003600	GLYMA_17G065400	GLYMA_10G004700		GLYMA_07G136500
GLYMA_06G096200	GLYMA_19G064200	GLYMA_03G041300	GLYMA_02G093400	GLYMA_09G031600	GLYMA_13G063800	GLYMA_06G318200	GLYMA_05G231600	GLYMA_16G034300	GLYMA_01G031300		GLYMA_06G096200
GLYMA_05G208700	GLYMA_18G213000	GLYMA_07G162700	GLYMA_02G159700	GLYMA_16G210300	GLYMA_05G228100	GLYMA_17G138500	GLYMA_16G046300	GLYMA_U038600	GLYMA_14G090300		GLYMA_05G208700
GLYMA_09G010800	GLYMA_15G215600	GLYMA_13G304900	GLYMA_17G173800	GLYMA_15G034300	GLYMA_01G106100	GLYMA_13G300400	GLYMA_02G147100	GLYMA_20G049800	GLYMA_05G109600		GLYMA_09G010800
GLYMA_12G018900	GLYMA_08G336300	GLYMA_03G123600	GLYMA_11G034300	GLYMA_02G204500	GLYMA_14G073300	GLYMA_20G049800	GLYMA_11G059900	GLYMA_17G138500	GLYMA_11G109200		GLYMA_12G018900
GLYMA_07G104800	GLYMA_01G098700	GLYMA_13G202100	GLYMA_14G090200	GLYMA_13G328900	GLYMA_03G056800	GLYMA_14G003600	GLYMA_19G001400	GLYMA_20G232000	GLYMA_19G005900		GLYMA_07G104800
GLYMA_12G216300	GLYMA_17G232600	GLYMA_01G195500	GLYMA_15G063000	GLYMA_03G157000	GLYMA_09G141800	GLYMA_06G103700	GLYMA_02G105300	GLYMA_03G110600	GLYMA_14G181800		GLYMA_12G216300
GLYMA_01G125800	GLYMA_09G136400	GLYMA_18G154200	GLYMA_16G181900	GLYMA_05G149700	GLYMA_18G165000	GLYMA_04G025300	GLYMA_20G241700	GLYMA_16G126400	GLYMA_03G147900		GLYMA_01G125800
GLYMA_20G121900	GLYMA_19G042000	GLYMA_09G129800	GLYMA_01G232400	GLYMA_06G148500	GLYMA_02G110300	GLYMA_09G268800	GLYMA_09G061300	GLYMA_08G195100	GLYMA_07G132100		GLYMA_20G121900
GLYMA_03G123600	GLYMA_20G196200	GLYMA_13G110200	GLYMA_17G009800	GLYMA_17G233600	GLYMA_17G131200	GLYMA_07G242700	GLYMA_20G231800	GLYMA_06G137600	GLYMA_20G162600		GLYMA_03G123600
GLYMA_14G115500	GLYMA_10G011500	GLYMA_08G028800	GLYMA_14G109200	GLYMA_10G218900	GLYMA_16G034300	GLYMA_13G255000	GLYMA_19G043000	GLYMA_18G272200	GLYMA_14G179200		GLYMA_14G115500
GLYMA_19G110000	GLYMA_10G241600	GLYMA_05G216900	GLYMA_07G237500	GLYMA_03G224800	GLYMA_10G156500	GLYMA_15G131000	GLYMA_15G234300	GLYMA_15G055800	GLYMA_14G038200		GLYMA_19G110000
GLYMA_06G294500	GLYMA_02G195900	GLYMA_11G044700	GLYMA_09G040800	GLYMA_14G011100	GLYMA_19G260000	GLYMA_15G221600	GLYMA_17G086500	GLYMA_16G200400	GLYMA_11G228000		GLYMA_06G294500
GLYMA_18G232800	GLYMA_03G116200	GLYMA_04G221700	GLYMA_14G048400	GLYMA_20G224300	GLYMA_06G100500	GLYMA_20G201200	GLYMA_07G259400	GLYMA_14G056300	GLYMA_11G044700		GLYMA_18G232800
GLYMA_18G077900	GLYMA_06G077500	GLYMA_02G056600	GLYMA_20G089900	GLYMA_20G212100	GLYMA_05G007400	GLYMA_11G104200	GLYMA_11G146600	GLYMA_02G003800	GLYMA_08G140600		GLYMA_18G077900
ENSRNA050001302	GLYMA_09G028400	GLYMA_09G275200	GLYMA_15G114700	GLYMA_18G289100	GLYMA_10G154200	GLYMA_06G072900	GLYMA_07G266700	GLYMA_12G002000	GLYMA_01G022300		ENSRNA050001302
GLYMA_11G208800	GLYMA_10G063100	GLYMA_15G046900	GLYMA_11G176000	GLYMA_11G185100	GLYMA_17G009800	GLYMA_17G089300	GLYMA_13G247600	GLYMA_02G222800	GLYMA_09G071300		GLYMA_11G208800
GLYMA_18G108700	GLYMA_04G190300	GLYMA_01G195900	GLYMA_10G274800	GLYMA_20G139500	GLYMA_03G071700	GLYMA_06G284700	GLYMA_16G017700	GLYMA_20G231800	GLYMA_14G052500		GLYMA_18G108700
GLYMA_15G144700	GLYMA_01G158000	GLYMA_02G016500	GLYMA_20G234100	GLYMA_09G018100	GLYMA_14G052100	GLYMA_13G251100	GLYMA_03G083700	GLYMA_15G217100	GLYMA_17G236500		GLYMA_15G144700
GLYMA_02G299300	GLYMA_08G191900	GLYMA_15G229400	GLYMA_11G044400	GLYMA_20G189600	GLYMA_01G173500	GLYMA_11G025000	GLYMA_13G255800	GLYMA_10G031200	GLYMA_18G042100		GLYMA_02G299300
GLYMA_20G097100	GLYMA_04G004800	GLYMA_08G023700	GLYMA_11G033900	GLYMA_06G159600	GLYMA_20G035200	GLYMA_06G202200	GLYMA_16G034300	GLYMA_02G026300	GLYMA_06G163200		GLYMA_20G097100
GLYMA_12G191000	GLYMA_15G201700	GLYMA_11G084500	GLYMA_02G046800	GLYMA_05G020600	GLYMA_20G189600	GLYMA_17G098100	GLYMA_13G251100	GLYMA_13G346700	GLYMA_01G134600		GLYMA_12G191000
GLYMA_09G166700	GLYMA_13G304100	GLYMA_17G089300	GLYMA_08G106400	GLYMA_20G152600	ENSRNA050030686	GLYMA_01G158000	GLYMA_18G281000	GLYMA_09G181200	GLYMA_14G212200		GLYMA_09G166700
GLYMA_19G172900	GLYMA_12G197000	GLYMA_06G223300	GLYMA_12G171100	GLYMA_13G294800	GLYMA_11G208800	GLYMA_18G213000	GLYMA_09G129800	GLYMA_01G100000	GLYMA_05G044000		GLYMA_19G172900
GLYMA_17G233200	GLYMA_12G152100	GLYMA_15G002300	GLYMA_20G248200	GLYMA_16G146800	GLYMA_13G255000	GLYMA_13G160400	GLYMA_18G006800	GLYMA_13G051900	GLYMA_01G007500		GLYMA_17G233200
GLYMA_15G202100	GLYMA_01G031300	GLYMA_19G159300	GLYMA_15G079900	GLYMA_05G075100	GLYMA_06G171700	GLYMA_07G151600	GLYMA_05G188700	GLYMA_04G173200	GLYMA_05G215900		GLYMA_15G202100
GLYMA_06G290300	GLYMA_02G269000	GLYMA_01G036000	GLYMA_14G216000	GLYMA_08G359400	GLYMA_06G317000	GLYMA_01G159700	GLYMA_16G041800	GLYMA_11G247400	GLYMA_04G060600		GLYMA_06G290300
GLYMA_08G325200	GLYMA_12G077800	GLYMA_15G146800	GLYMA_15G022000	GLYMA_04G043600	GLYMA_14G049700	GLYMA_11G232000	GLYMA_02G272100	GLYMA_08G175300	GLYMA_11G104100		GLYMA_08G325200
GLYMA_15G068400	GLYMA_20G140900	GLYMA_02G259300	GLYMA_10G138800	GLYMA_08G008700	GLYMA_08G114400	GLYMA_09G022400	GLYMA_20G033900	GLYMA_19G005900	GLYMA_20G064500		GLYMA_15G068400
GLYMA_08G010500	GLYMA_13G257000	GLYMA_05G160200	GLYMA_16G181600	GLYMA_09G047300	GLYMA_17G075300	GLYMA_01G216600	GLYMA_05G028700	GLYMA_14G224000	GLYMA_15G131600		GLYMA_08G010500
GLYMA_03G252800	GLYMA_04G039600	GLYMA_18G023500	GLYMA_08G279600	GLYMA_14G067700	GLYMA_05G042800	GLYMA_02G299300	GLYMA_18G275300	GLYMA_01G160300	GLYMA_06G289900		GLYMA_03G252800
GLYMA_19G234100	GLYMA_13G208700	GLYMA_08G297000	GLYMA_13G305100	GLYMA_11G253600	GLYMA_12G197900	GLYMA_14G174600	GLYMA_04G239500	GLYMA_04G225400	GLYMA_19G174900		GLYMA_19G234100
GLYMA_06G063200	GLYMA_02G007400	GLYMA_07G032300	GLYMA_09G191800	GLYMA_15G136700	GLYMA_06G289900	GLYMA_16G172400	GLYMA_11G193300	GLYMA_10G211000	GLYMA_14G194200		GLYMA_06G063200
GLYMA_17G157400	GLYMA_07G186700	GLYMA_03G063000	GLYMA_13G119000	GLYMA_04G040500	GLYMA_08G289300	GLYMA_01G124700	GLYMA_20G201200	GLYMA_14G057200	GLYMA_08G227400		GLYMA_17G157400
GLYMA_10G178100	GLYMA_17G259500	GLYMA_18G060900	GLYMA_09G061300	GLYMA_20G219200	GLYMA_08G227200	GLYMA_07G107200	GLYMA_11G238800	GLYMA_13G339800	GLYMA_15G258400		GLYMA_10G178100
GLYMA_09G270900	GLYMA_09G273400	GLYMA_09G131500	GLYMA_19G050800	GLYMA_14G051900	GLYMA_13G051900	GLYMA_15G136700	GLYMA_03G148100	GLYMA_07G000500	GLYMA_12G018900		GLYMA_09G270900
GLYMA_02G261400	GLYMA_02G016500	GLYMA_01G168500	GLYMA_10G133900	GLYMA_03G221300	GLYMA_06G063200	GLYMA_18G232800	GLYMA_20G062500	GLYMA_06G235000	GLYMA_03G003000		GLYMA_02G261400
GLYMA_06G240400	GLYMA_07G270900	GLYMA_15G243000	GLYMA_13G051000	GLYMA_09G028700	GLYMA_14G197500	GLYMA_15G243000	GLYMA_13G342000	GLYMA_04G079400	GLYMA_02G063900		GLYMA_06G240400
GLYMA_08G308000	GLYMA_10G182800	GLYMA_03G016900	GLYMA_08G079100	GLYMA_13G104700	GLYMA_13G256600	GLYMA_04G006300	GLYMA_11G185100	GLYMA_14G090300	GLYMA_05G025800		GLYMA_08G308000
GLYMA_03G042700	GLYMA_01G243200	GLYMA_12G193700	GLYMA_04G165900	GLYMA_13G208100	GLYMA_20G015900	GLYMA_19G042100	GLYMA_20G247900	GLYMA_20G089900	GLYMA_15G058800		GLYMA_03G042700
GLYMA_20G151800	GLYMA_03G050500	GLYMA_20G087900	GLYMA_20G217100	GLYMA_14G090300	GLYMA_13G255800	GLYMA_10G007500	GLYMA_01G219100	GLYMA_13G368100	GLYMA_13G311100		GLYMA_20G151800
GLYMA_10G028500	GLYMA_18G281000	GLYMA_06G324200	GLYMA_07G086700	GLYMA_03G016200	GLYMA_09G170500	GLYMA_20G203100	GLYMA_10G122700	GLYMA_20G241700	GLYMA_15G084500		GLYMA_10G028500
GLYMA_11G244800	GLYMA_13G215400	GLYMA_18G261800	GLYMA_04G005300	GLYMA_09G272900	GLYMA_09G153900	GLYMA_12G121600	GLYMA_13G148700	GLYMA_17G139000	GLYMA_17G262300		GLYMA_11G244800
GLYMA_04G191200	GLYMA_08G220800	GLYMA_02G228000	GLYMA_10G194000	GLYMA_02G080800	GLYMA_07G079600	GLYMA_12G042900	GLYMA_17G064500	GLYMA_02G259200	GLYMA_14G221200		GLYMA_04G191200
GLYMA_20G189600	GLYMA_09G129900	GLYMA_02G185100	GLYMA_10G021700	GLYMA_19G034900	GLYMA_02G069700	GLYMA_01G047800	GLYMA_16G167100	GLYMA_16G217700	GLYMA_03G063000		GLYMA_20G189600
GLYMA_18G214100	GLYMA_18G205800	GLYMA_03G157800	GLYMA_06G169700	GLYMA_14G029900	GLYMA_17G031500	GLYMA_15G025400	GLYMA_07G151600	GLYMA_11G164800	GLYMA_13G264400		GLYMA_18G214100
GLYMA_13G346700	GLYMA_18G012200	GLYMA_08G254600	GLYMA_08G200100	GLYMA_04G080600	GLYMA_13G257200	GLYMA_16G017400	GLYMA_20G139500	GLYMA_13G215400	GLYMA_08G355000		GLYMA_13G346700
GLYMA_18G236700	GLYMA_06G017400	GLYMA_11G073300	GLYMA_18G107200	GLYMA_18G230600	GLYMA_20G151800	GLYMA_04G079400	GLYMA_09G194100	GLYMA_02G261900	GLYMA_07G260600		GLYMA_18G236700
GLYMA_07G032300	GLYMA_15G148300	GLYMA_18G139900	GLYMA_10G138500	GLYMA_02G219800	GLYMA_01G166300	GLYMA_03G152500	GLYMA_09G031600	GLYMA_06G308100	GLYMA_13G255800		GLYMA_07G032300
GLYMA_01G004200	GLYMA_09G020300	GLYMA_03G157000	GLYMA_13G062500	GLYMA_06G176700	GLYMA_16G021700	GLYMA_13G247600	GLYMA_14G115500	GLYMA_04G145100	GLYMA_01G160300		GLYMA_01G004200
GLYMA_20G131100	GLYMA_09G024900	GLYMA_02G199300	GLYMA_15G133900	GLYMA_06G267300	GLYMA_10G050400	GLYMA_02G224100	GLYMA_07G265000	GLYMA_09G234700	GLYMA_19G195300		GLYMA_20G131100
GLYMA_02G034200	GLYMA_19G258000	GLYMA_01G022300	GLYMA_02G283400	GLYMA_09G012200	GLYMA_07G084200	GLYMA_19G147800	GLYMA_20G130200	GLYMA_09G188200	GLYMA_08G032900		GLYMA_02G034200
GLYMA_20G050500	GLYMA_05G055400	GLYMA_02G285000	GLYMA_04G103500	GLYMA_02G105300	GLYMA_12G186200	GLYMA_20G147600	GLYMA_01G022300	GLYMA_06G035300	GLYMA_13G283900		GLYMA_20G050500
GLYMA_06G324200	GLYMA_10G039400	GLYMA_01G054100	GLYMA_17G042900	GLYMA_20G033900	GLYMA_15G273700	GLYMA_13G169700	GLYMA_04G205100	GLYMA_19G222500	GLYMA_07G078200		GLYMA_06G324200
GLYMA_20G147200	GLYMA_19G051100	GLYMA_06G033100	GLYMA_17G261500	GLYMA_12G023300	GLYMA_14G179200	GLYMA_02G126100	GLYMA_18G109600	GLYMA_10G028900	GLYMA_05G160200		GLYMA_20G147200
GLYMA_10G211000	GLYMA_03G261900	GLYMA_14G007900	GLYMA_09G077100	ENSRNA050001454	GLYMA_10G249600	GLYMA_13G080500	GLYMA_08G180900	GLYMA_15G113200	GLYMA_01G134700		GLYMA_10G211000
GLYMA_05G150100	GLYMA_10G029600	GLYMA_10G007500	GLYMA_03G123600	GLYMA_17G078700	GLYMA_06G035300	GLYMA_01G224800	GLYMA_12G108500	GLYMA_14G048400	GLYMA_11G092600		GLYMA_05G150100
GLYMA_08G289300	GLYMA_13G108300	GLYMA_18G211800	GLYMA_10G043800	GLYMA_18G213000	GLYMA_18G071400	GLYMA_10G195700	GLYMA_01G006800	GLYMA_11G253600	GLYMA_04G040300		GLYMA_08G289300
GLYMA_11G130900	GLYMA_03G123600	GLYMA_06G103700	GLYMA_08G000800	GLYMA_03G183000	GLYMA_13G163900	GLYMA_10G067100	GLYMA_04G004600	GLYMA_08G312000	GLYMA_17G236200		GLYMA_11G130900
GLYMA_20G241700	GLYMA_04G091300	GLYMA_09G181200	GLYMA_06G061700	GLYMA_07G017000	GLYMA_18G212500	GLYMA_10G060800	GLYMA_15G058300	GLYMA_04G238600	GLYMA_06G169700		GLYMA_20G241700
GLYMA_09G095800	GLYMA_04G216100	GLYMA_11G030800	GLYMA_18G049500	GLYMA_01G054100	GLYMA_14G132500	GLYMA_13G303700	GLYMA_14G045000	GLYMA_02G059500	GLYMA_06G290300		GLYMA_09G095800
GLYMA_06G000600	GLYMA_12G021800	GLYMA_08G306600	GLYMA_18G010500	GLYMA_16G162600	GLYMA_09G043900	GLYMA_03G252500	GLYMA_19G143300	GLYMA_17G096500	GLYMA_20G095900		GLYMA_06G000600
GLYMA_01G071300	GLYMA_20G115900	GLYMA_12G116400	GLYMA_11G055200	GLYMA_13G147600	GLYMA_02G059500	GLYMA_09G095800	GLYMA_10G229800	GLYMA_06G142200	GLYMA_06G022900		GLYMA_01G071300
GLYMA_04G178500	GLYMA_15G146800	GLYMA_06G010500	GLYMA_14G056300	GLYMA_08G251500	GLYMA_01G026200	GLYMA_08G000800	GLYMA_07G261800	GLYMA_05G188600	GLYMA_13G277500		GLYMA_04G178500
GLYMA_13G066100	GLYMA_14G220100	GLYMA_19G239800	GLYMA_07G155200	GLYMA_01G180400	GLYMA_15G239600	GLYMA_09G272900	GLYMA_14G110500	GLYMA_15G270900	GLYMA_06G154700		GLYMA_13G066100
GLYMA_18G216200	GLYMA_07G136500	GLYMA_01G104600	GLYMA_07G270900	GLYMA_07G141600	GLYMA_09G043200	GLYMA_06G307600	GLYMA_09G201900	GLYMA_03G123600	GLYMA_19G214100		GLYMA_18G216200
GLYMA_02G007000	GLYMA_04G221700	GLYMA_10G065200	GLYMA_05G226100	GLYMA_16G188900	GLYMA_13G215000	GLYMA_10G028900	GLYMA_18G193300	GLYMA_04G216100	GLYMA_06G301200		GLYMA_02G007000
GLYMA_12G044700	GLYMA_02G184700	GLYMA_08G287500	GLYMA_15G169300	GLYMA_03G012800	GLYMA_09G134100	GLYMA_08G251500	GLYMA_09G275200	GLYMA_19G250400	GLYMA_14G223000		GLYMA_12G044700
GLYMA_11G219600	GLYMA_01G022300	GLYMA_09G047300	GLYMA_02G018900	GLYMA_13G350400	GLYMA_12G018900	GLYMA_10G295300	GLYMA_02G071700	GLYMA_01G186700	GLYMA_13G342000		GLYMA_11G219600
GLYMA_14G197500	GLYMA_16G200800	GLYMA_15G117000	GLYMA_18G041300	GLYMA_19G110600	GLYMA_05G072200	GLYMA_13G303000	GLYMA_04G080600	GLYMA_11G246800	GLYMA_04G065800		GLYMA_14G197500
GLYMA_04G179600	GLYMA_08G032900	GLYMA_15G237600	GLYMA_15G144100	GLYMA_09G215600	GLYMA_14G094500	GLYMA_13G051000	GLYMA_06G102400	GLYMA_13G173100	GLYMA_14G067000		GLYMA_04G179600
GLYMA_10G155300	GLYMA_14G206500	GLYMA_08G180500	GLYMA_04G030400	GLYMA_08G367700	GLYMA_06G166100	GLYMA_19G061500	GLYMA_05G245900	GLYMA_18G010500	GLYMA_18G009900		GLYMA_10G155300
ENSRNA050001786	GLYMA_07G255000	GLYMA_14G086600	GLYMA_04G190900	GLYMA_01G211000	GLYMA_11G243400	GLYMA_18G236700	GLYMA_13G312700	GLYMA_06G171700	GLYMA_04G052200		ENSRNA050001786
GLYMA_03G206000	GLYMA_18G284400	GLYMA_19G142000	GLYMA_14G221200	GLYMA_15G147100	GLYMA_20G231800	GLYMA_20G241700	GLYMA_03G116200	GLYMA_02G056600	GLYMA_16G133400		GLYMA_03G206000
GLYMA_15G032300	GLYMA_14G011700	GLYMA_19G117000	GLYMA_08G162100	GLYMA_09G268800	GLYMA_20G041100	GLYMA_01G054100	GLYMA_11G068700	GLYMA_13G304400	GLYMA_05G231800		GLYMA_15G032300
GLYMA_13G257000	GLYMA_17G103300	GLYMA_20G139500	GLYMA_16G177000	GLYMA_10G017000	GLYMA_18G012800	GLYMA_01G071300	GLYMA_10G256100	GLYMA_11G104100	GLYMA_04G136200		GLYMA_13G257000
GLYMA_19G258000	GLYMA_13G259600	GLYMA_19G236900	GLYMA_19G034900	GLYMA_04G133500	GLYMA_07G048100	GLYMA_07G201000	GLYMA_04G254500	GLYMA_19G151400	GLYMA_19G235400		GLYMA_19G258000
GLYMA_06G018100	GLYMA_08G131300	GLYMA_11G140500	GLYMA_09G072700	GLYMA_19G143300	GLYMA_11G254700	GLYMA_13G368700	GLYMA_02G203300	GLYMA_13G096200	GLYMA_02G282900		GLYMA_06G018100
GLYMA_19G159000	GLYMA_02G126100	GLYMA_10G218900	GLYMA_02G269000	GLYMA_20G153500	GLYMA_17G127300	GLYMA_13G184100	GLYMA_15G133900	GLYMA_14G073300	GLYMA_18G183700		GLYMA_19G159000
GLYMA_13G173100	GLYMA_14G083600	GLYMA_10G155300	GLYMA_09G043400	GLYMA_11G160600	GLYMA_09G247700	GLYMA_03G250200	GLYMA_09G126500	GLYMA_09G234900	GLYMA_18G082000		GLYMA_13G173100
GLYMA_17G042800	GLYMA_14G109200	GLYMA_18G042100	GLYMA_03G260600	GLYMA_14G205000	GLYMA_18G245100	GLYMA_06G117800	GLYMA_16G010500	GLYMA_04G023000	GLYMA_04G137100		GLYMA_17G042800
GLYMA_06G103700	GLYMA_10G261600	GLYMA_06G137600	GLYMA_03G247000	GLYMA_04G136000	GLYMA_13G122400	GLYMA_20G238300	GLYMA_15G014500	GLYMA_12G095100	GLYMA_03G123600		GLYMA_06G103700
GLYMA_18G210900	GLYMA_16G157800	GLYMA_16G023500	GLYMA_09G039500	GLYMA_14G047500	GLYMA_20G150600	GLYMA_03G132700	GLYMA_09G256100	GLYMA_17G075300	GLYMA_05G248800		GLYMA_18G210900
GLYMA_13G085800	GLYMA_06G158000	GLYMA_15G209300	GLYMA_16G200400	GLYMA_05G241300	GLYMA_10G060800	GLYMA_11G185100	GLYMA_14G096700	GLYMA_09G276800	GLYMA_11G119200		GLYMA_13G085800
GLYMA_10G230400	GLYMA_18G071400	GLYMA_12G004600	GLYMA_02G286900	GLYMA_13G280500	GLYMA_12G095100	GLYMA_15G267000	GLYMA_09G263100	GLYMA_15G146800	GLYMA_02G145100		GLYMA_10G230400
GLYMA_07G110000	GLYMA_05G013700	GLYMA_08G234900	GLYMA_15G141000	GLYMA_20G006600	GLYMA_08G144400	GLYMA_19G128400	GLYMA_18G216200	GLYMA_02G110300	GLYMA_02G104300		GLYMA_07G110000
GLYMA_18G141900	GLYMA_14G037100	GLYMA_18G259600	GLYMA_07G133800	GLYMA_06G033100	GLYMA_20G247900	GLYMA_17G011800	GLYMA_02G135700	GLYMA_17G115300	GLYMA_13G056500		GLYMA_18G141900
GLYMA_05G149700	GLYMA_17G029500	GLYMA_06G308100	GLYMA_08G201700	GLYMA_14G052600	GLYMA_10G124200	GLYMA_15G170500	GLYMA_16G017400	GLYMA_07G020400	GLYMA_18G266200		GLYMA_05G149700
GLYMA_19G168700	GLYMA_09G040800	GLYMA_03G041200	GLYMA_07G255600	GLYMA_17G164500	GLYMA_04G223100	GLYMA_17G026000	GLYMA_15G063200	GLYMA_19G234100	GLYMA_19G128400		GLYMA_19G168700
GLYMA_07G207000	GLYMA_06G004900	GLYMA_03G148100	GLYMA_11G253900	GLYMA_09G070400	GLYMA_12G063900	GLYMA_10G211000	GLYMA_18G049500	GLYMA_06G297400	GLYMA_18G245100		GLYMA_07G207000
GLYMA_20G006600	GLYMA_15G057700	GLYMA_18G278100	GLYMA_02G034700	GLYMA_02G148300	GLYMA_12G035700	GLYMA_11G243400	GLYMA_11G219400	GLYMA_06G239500	GLYMA_15G148300		GLYMA_20G006600
GLYMA_14G064000	GLYMA_02G046800	GLYMA_09G095800	GLYMA_11G052200	GLYMA_10G250200	GLYMA_06G006100	GLYMA_08G017700	GLYMA_08G144500	GLYMA_08G073300	GLYMA_02G034500		GLYMA_14G064000
GLYMA_04G025300	GLYMA_12G121400	GLYMA_16G216800	GLYMA_08G314900	GLYMA_15G118500	GLYMA_15G181800	GLYMA_15G002200	GLYMA_16G200400	GLYMA_07G202500	GLYMA_09G268800		GLYMA_04G025300
GLYMA_19G018300	GLYMA_19G192900	GLYMA_15G089100	GLYMA_20G137000	GLYMA_12G039200	GLYMA_05G246500	GLYMA_01G004200	GLYMA_08G287500	GLYMA_11G045800	GLYMA_01G098700		GLYMA_19G018300
GLYMA_14G037100	GLYMA_09G237000	GLYMA_09G068700	GLYMA_15G176500	GLYMA_01G022300	GLYMA_03G259200	GLYMA_14G142700	GLYMA_02G045900	GLYMA_03G259200	GLYMA_15G019300		GLYMA_14G037100
GLYMA_07G229200	GLYMA_09G022400	GLYMA_14G029800	GLYMA_15G128300	GLYMA_01G137000	GLYMA_08G314900	GLYMA_03G157600	GLYMA_09G234700	GLYMA_10G004700	GLYMA_10G211000		GLYMA_07G229200
GLYMA_10G231900	GLYMA_18G016900	GLYMA_03G221300	GLYMA_12G215700	GLYMA_11G113300	GLYMA_08G308300	GLYMA_17G212200	GLYMA_02G239000	GLYMA_19G204900	GLYMA_13G354900		GLYMA_10G231900
GLYMA_16G165600	GLYMA_13G031500	GLYMA_16G200400	GLYMA_20G142100	GLYMA_17G211900	GLYMA_20G194900	GLYMA_08G033000	GLYMA_06G125700	GLYMA_09G039500	GLYMA_18G260500		GLYMA_16G165600
GLYMA_11G143100	GLYMA_06G072900	GLYMA_17G158300	GLYMA_19G214500	GLYMA_02G278400	GLYMA_10G011500	GLYMA_11G233500	GLYMA_09G192700	GLYMA_12G055200	GLYMA_06G096200		GLYMA_11G143100
GLYMA_09G025500	GLYMA_12G225700	GLYMA_08G367800	GLYMA_07G218900	GLYMA_08G144400	GLYMA_08G251900	GLYMA_12G011500	GLYMA_20G212100	GLYMA_19G023200	GLYMA_02G003700		GLYMA_09G025500
GLYMA_19G147800	GLYMA_11G076100	GLYMA_17G110300	GLYMA_14G178600	GLYMA_14G163600	GLYMA_03G188500	GLYMA_16G120200	GLYMA_11G253600	GLYMA_03G156700	GLYMA_15G016800		GLYMA_19G147800
GLYMA_04G177900	GLYMA_03G154200	GLYMA_01G072800	GLYMA_17G139000	GLYMA_05G048400	GLYMA_16G153600	GLYMA_01G193500	GLYMA_13G300400	GLYMA_05G049900	GLYMA_15G030100		GLYMA_04G177900
GLYMA_09G046100	GLYMA_06G149500	GLYMA_08G102300	GLYMA_10G154200	GLYMA_10G283700	GLYMA_07G096500	GLYMA_13G307000	GLYMA_20G087900	GLYMA_13G233900	GLYMA_02G116400		GLYMA_09G046100
GLYMA_17G099000	GLYMA_05G119000	GLYMA_17G110200	GLYMA_15G005000	GLYMA_13G048100	GLYMA_07G101000	GLYMA_18G211800	GLYMA_06G105100	GLYMA_13G306600	GLYMA_14G055100		GLYMA_17G099000
GLYMA_13G004200	GLYMA_03G177300	GLYMA_08G032900	GLYMA_12G021800	GLYMA_13G308000	GLYMA_16G019500	GLYMA_17G049500	GLYMA_19G110600	GLYMA_14G127800	GLYMA_06G000600		GLYMA_13G004200
GLYMA_02G118100	GLYMA_13G353100	GLYMA_10G052100	GLYMA_09G229200	GLYMA_09G278700	GLYMA_09G069900	GLYMA_04G137600	GLYMA_15G128300	GLYMA_04G065800	GLYMA_16G155100		GLYMA_02G118100
GLYMA_07G116700	GLYMA_09G138300	GLYMA_03G047100	GLYMA_17G017200	GLYMA_15G130900	GLYMA_09G204100	GLYMA_15G239700	GLYMA_07G207400	GLYMA_08G180400	GLYMA_06G149100		GLYMA_07G116700
GLYMA_20G203500	GLYMA_08G073300	GLYMA_03G187000	GLYMA_02G128000	GLYMA_13G312700	GLYMA_16G138400	GLYMA_12G120200	GLYMA_17G045600	GLYMA_09G012400	GLYMA_20G191600		GLYMA_20G203500
GLYMA_04G230400	GLYMA_04G205100	GLYMA_01G193500	GLYMA_06G143700	GLYMA_11G255500	GLYMA_14G038800	GLYMA_10G112800	GLYMA_02G185100	GLYMA_06G249800	GLYMA_10G189400		GLYMA_04G230400
GLYMA_18G009900	GLYMA_14G158500	GLYMA_14G091000	GLYMA_12G023300	GLYMA_09G132200	GLYMA_04G196100	GLYMA_18G125200	GLYMA_04G255600	GLYMA_18G018600	GLYMA_20G147200		GLYMA_18G009900
GLYMA_10G195700	GLYMA_03G101000	GLYMA_02G128000	GLYMA_17G044600	GLYMA_02G296800	GLYMA_11G097600	GLYMA_04G115600	GLYMA_04G052200	GLYMA_11G192600	GLYMA_09G039000		GLYMA_10G195700
GLYMA_20G142900	GLYMA_13G099100	GLYMA_03G252800	GLYMA_12G004600	GLYMA_16G017400	GLYMA_11G092600	GLYMA_14G056300	GLYMA_18G012800	GLYMA_07G050000	GLYMA_11G076100		GLYMA_20G142900
GLYMA_11G228000	GLYMA_02G143200	GLYMA_08G177200	GLYMA_U044100	GLYMA_11G084500	GLYMA_10G136700	GLYMA_10G288400	GLYMA_17G078700	GLYMA_07G136500	GLYMA_09G025500		GLYMA_11G228000
GLYMA_11G071100	GLYMA_10G090000	GLYMA_19G147800	GLYMA_18G004300	GLYMA_13G354400	GLYMA_10G172900	GLYMA_04G240600	GLYMA_01G113400	GLYMA_20G203000	GLYMA_11G202800		GLYMA_11G071100
GLYMA_08G053700	GLYMA_15G141000	GLYMA_11G164800	GLYMA_10G053000	GLYMA_13G368700	GLYMA_11G219400	GLYMA_14G091500	GLYMA_15G117000	GLYMA_16G139400	GLYMA_04G054200		GLYMA_08G053700
GLYMA_04G071600	GLYMA_05G175500	GLYMA_16G126500	GLYMA_05G214900	GLYMA_13G049700	GLYMA_08G000800	GLYMA_13G110200	GLYMA_10G230400	GLYMA_07G100600	GLYMA_17G096500		GLYMA_04G071600
GLYMA_06G187000	GLYMA_06G000600	GLYMA_01G217400	GLYMA_U041200	GLYMA_05G140700	GLYMA_13G350000	GLYMA_14G115500	GLYMA_14G140900	GLYMA_15G243000	GLYMA_03G166000		GLYMA_06G187000
GLYMA_19G183800	GLYMA_16G100800	GLYMA_05G208700	GLYMA_13G321200	GLYMA_06G215200	GLYMA_19G179800	GLYMA_07G014600	GLYMA_19G051100	GLYMA_13G251100	GLYMA_20G224300		GLYMA_19G183800
GLYMA_07G251100	GLYMA_17G008800	GLYMA_13G328900	GLYMA_06G307000	GLYMA_11G193300	GLYMA_04G175900	GLYMA_18G023500	GLYMA_18G289100	GLYMA_01G181700	GLYMA_16G138400		GLYMA_07G251100
GLYMA_08G158800	GLYMA_12G062700	GLYMA_08G251900	GLYMA_18G031400	GLYMA_07G115800	GLYMA_08G330700	GLYMA_02G128000	GLYMA_14G007000	GLYMA_14G049700	GLYMA_08G073300		GLYMA_08G158800
GLYMA_14G073300	GLYMA_20G089900	GLYMA_04G052200	GLYMA_08G308300	GLYMA_09G273400	GLYMA_07G049900	GLYMA_18G006800	GLYMA_08G118100	GLYMA_18G212500	GLYMA_01G195500		GLYMA_14G073300
GLYMA_15G150100	GLYMA_04G084900	GLYMA_03G134900	GLYMA_02G046200	GLYMA_12G215700	GLYMA_05G075000	GLYMA_09G032100	GLYMA_13G362800	GLYMA_12G063900	GLYMA_05G085400		GLYMA_15G150100
GLYMA_03G138300	GLYMA_08G152000	GLYMA_09G060400	GLYMA_17G188200	GLYMA_17G031500	GLYMA_09G269500	GLYMA_14G200800	GLYMA_18G186900	GLYMA_16G206400	GLYMA_19G144400		GLYMA_03G138300
GLYMA_15G142200	GLYMA_19G101300	GLYMA_05G108600	GLYMA_11G207900	GLYMA_12G179700	GLYMA_19G085100	GLYMA_20G039600	GLYMA_15G144700	GLYMA_11G025000	GLYMA_02G259300		GLYMA_15G142200
GLYMA_07G216400	GLYMA_08G017000	GLYMA_17G157400	GLYMA_15G273700	GLYMA_04G055500	GLYMA_09G263100	GLYMA_13G328900	GLYMA_12G006500	GLYMA_18G006800	GLYMA_06G113300		GLYMA_07G216400
GLYMA_19G028600	GLYMA_16G181600	GLYMA_09G022400	GLYMA_02G024100	GLYMA_02G199300	GLYMA_14G176800	GLYMA_15G144700	GLYMA_04G060800	GLYMA_13G163900	GLYMA_03G173300		GLYMA_19G028600
GLYMA_17G250000	GLYMA_13G112500	GLYMA_08G284800	GLYMA_01G150000	GLYMA_03G196400	GLYMA_16G206400	GLYMA_14G210600	GLYMA_17G009900	GLYMA_03G041300	GLYMA_10G195700		GLYMA_17G250000
GLYMA_08G213100	GLYMA_20G206600	GLYMA_15G192100	GLYMA_14G221300	GLYMA_01G124700	GLYMA_02G068800	GLYMA_17G044700	GLYMA_14G091500	GLYMA_13G066600	GLYMA_02G195300		GLYMA_08G213100
GLYMA_06G301200	GLYMA_17G017200	GLYMA_12G007000	GLYMA_08G220800	GLYMA_07G224100	GLYMA_14G067800	GLYMA_20G162600	GLYMA_09G268800	GLYMA_15G063200	GLYMA_11G095200		GLYMA_06G301200
GLYMA_06G143700	GLYMA_15G134400	GLYMA_12G204600	GLYMA_14G134900	GLYMA_13G082000	GLYMA_15G042600	GLYMA_11G084500	GLYMA_13G358600	GLYMA_19G043000	GLYMA_08G106400		GLYMA_06G143700
GLYMA_20G207200	GLYMA_13G087800	GLYMA_17G065300	GLYMA_19G159000	GLYMA_02G286600	GLYMA_04G216100	GLYMA_10G029300	GLYMA_08G212300	GLYMA_01G052300	GLYMA_10G138200		GLYMA_20G207200
GLYMA_09G111500	GLYMA_10G059700	GLYMA_06G294500	GLYMA_10G076100	GLYMA_13G306600	GLYMA_07G021000	GLYMA_06G187100	GLYMA_02G219800	GLYMA_13G176000	GLYMA_15G144100		GLYMA_09G111500
GLYMA_08G066800	GLYMA_04G087500	GLYMA_06G206800	GLYMA_02G261900	GLYMA_15G117000	GLYMA_06G017400	GLYMA_20G087900	GLYMA_08G000800	GLYMA_16G023500	GLYMA_08G251900		GLYMA_08G066800
GLYMA_14G176400	GLYMA_02G266600	GLYMA_10G050400	GLYMA_07G181700	GLYMA_02G034500	GLYMA_03G123600	GLYMA_13G151800	GLYMA_13G062800	GLYMA_15G133900	GLYMA_03G196400		GLYMA_14G176400
GLYMA_01G036800	GLYMA_10G138700	GLYMA_11G233500	GLYMA_06G023900	GLYMA_06G318200	GLYMA_15G118500	GLYMA_20G151800	GLYMA_08G105600	GLYMA_14G004800	GLYMA_19G111700		GLYMA_01G036800
ENSRNA050003439	GLYMA_11G212400	GLYMA_09G029400	GLYMA_11G104200	GLYMA_03G114300	GLYMA_08G201200	GLYMA_05G028700	GLYMA_12G023300	GLYMA_04G022100	GLYMA_06G310100		ENSRNA050003439
GLYMA_04G239400	GLYMA_06G196600	GLYMA_17G093600	GLYMA_10G277700	GLYMA_02G013500	GLYMA_16G128800	GLYMA_07G229200	GLYMA_03G187000	GLYMA_09G134100	GLYMA_06G190100		GLYMA_04G239400
GLYMA_01G021200	GLYMA_17G127200	GLYMA_08G319200	GLYMA_13G046600	GLYMA_07G210100	GLYMA_03G032400	GLYMA_16G121900	GLYMA_03G134100	GLYMA_18G257000	GLYMA_01G021200		GLYMA_01G021200
GLYMA_08G204900	GLYMA_19G213900	GLYMA_04G115600	GLYMA_19G045400	GLYMA_12G096900	GLYMA_17G262300	GLYMA_13G089800	GLYMA_01G168500	GLYMA_15G221600	GLYMA_05G075100		GLYMA_08G204900
GLYMA_13G228900	GLYMA_14G067000	GLYMA_14G133100	GLYMA_16G221500	GLYMA_13G233600	GLYMA_06G264800	GLYMA_07G210000	GLYMA_01G193500	GLYMA_16G017700	GLYMA_13G165600		GLYMA_13G228900
GLYMA_01G031300	GLYMA_01G129100	GLYMA_08G056700	GLYMA_08G363500	GLYMA_03G062800	GLYMA_13G262700	GLYMA_04G184500	GLYMA_09G273400	GLYMA_06G271400	GLYMA_20G015900		GLYMA_01G031300
ENSRNA050002131	GLYMA_18G267900	GLYMA_10G241100	GLYMA_14G011700	GLYMA_18G138000	GLYMA_13G162900	GLYMA_04G190600	GLYMA_19G076200	GLYMA_10G017600	GLYMA_03G156700		ENSRNA050002131
GLYMA_12G042900	GLYMA_09G015900	GLYMA_01G062400	GLYMA_05G056100	GLYMA_11G196400	GLYMA_10G011000	GLYMA_20G149900	GLYMA_08G234900	GLYMA_16G077900	GLYMA_13G298100		GLYMA_12G042900
GLYMA_09G261600	GLYMA_02G269400	GLYMA_06G290500	GLYMA_12G228100	GLYMA_08G284800	GLYMA_04G091800	GLYMA_01G076700	GLYMA_15G102300	GLYMA_17G111100	GLYMA_08G079100		GLYMA_09G261600
GLYMA_13G104700	GLYMA_02G252600	GLYMA_15G057700	GLYMA_13G063800	GLYMA_03G154200	GLYMA_16G217000	GLYMA_13G062500	GLYMA_08G306600	GLYMA_07G069500	GLYMA_03G177300		GLYMA_13G104700
GLYMA_02G299200	GLYMA_12G001300	GLYMA_14G011100	GLYMA_18G023500	GLYMA_18G210900	GLYMA_13G228900	GLYMA_03G146100	GLYMA_09G043900	GLYMA_09G073000	GLYMA_03G197900		GLYMA_02G299200
GLYMA_12G001300	GLYMA_17G227400	GLYMA_17G045600	GLYMA_10G132500	GLYMA_02G308300	GLYMA_07G011900	GLYMA_12G015300	GLYMA_11G166500	GLYMA_02G097000	GLYMA_03G015800		GLYMA_12G001300
GLYMA_11G020500	GLYMA_08G360800	GLYMA_11G256500	GLYMA_14G203900	GLYMA_20G216000	GLYMA_14G194300	GLYMA_09G259500	GLYMA_U033600	GLYMA_05G241900	GLYMA_09G234700		GLYMA_11G020500
GLYMA_18G272200	GLYMA_04G252700	GLYMA_13G303000	GLYMA_08G229100	GLYMA_02G147100	GLYMA_18G010500	GLYMA_06G096600	GLYMA_06G137600	GLYMA_18G275300	GLYMA_04G175900		GLYMA_18G272200
GLYMA_13G247600	GLYMA_04G028900	GLYMA_18G272200	GLYMA_19G179800	GLYMA_07G078200	GLYMA_04G238600	GLYMA_08G017300	GLYMA_12G116400	GLYMA_01G193500	GLYMA_09G012400		GLYMA_13G247600
GLYMA_03G016400	GLYMA_07G244400	GLYMA_18G099500	GLYMA_15G270900	GLYMA_17G045600	GLYMA_10G138800	GLYMA_12G105700	GLYMA_04G177800	GLYMA_02G239000	GLYMA_17G013400		GLYMA_03G016400
GLYMA_07G078200	GLYMA_04G225400	GLYMA_05G055400	GLYMA_20G131100	GLYMA_10G228500	GLYMA_02G051700	GLYMA_15G046900	GLYMA_13G110200	GLYMA_15G100900	GLYMA_15G121000		GLYMA_07G078200
GLYMA_08G358400	GLYMA_13G080500	GLYMA_03G050100	GLYMA_02G004500	GLYMA_05G004600	GLYMA_06G103700	GLYMA_09G129800	GLYMA_17G089300	GLYMA_15G069900	GLYMA_11G253600		GLYMA_08G358400
GLYMA_11G037300	GLYMA_03G063000	GLYMA_06G169700	GLYMA_13G206500	GLYMA_03G194300	GLYMA_13G305400	GLYMA_19G159300	GLYMA_18G206000	GLYMA_09G095800	GLYMA_10G124200		GLYMA_11G037300
GLYMA_05G063700	GLYMA_10G250200	GLYMA_15G221600	GLYMA_18G245100	GLYMA_03G252500	GLYMA_17G047700	GLYMA_05G027500	GLYMA_19G238400	GLYMA_07G108200	GLYMA_10G182800		GLYMA_05G063700
GLYMA_07G137900	GLYMA_19G244100	GLYMA_07G015400	GLYMA_10G212100	GLYMA_02G108800	GLYMA_02G092500	GLYMA_18G180900	GLYMA_03G224800	GLYMA_01G124700	GLYMA_06G136800		GLYMA_07G137900
GLYMA_03G177300	GLYMA_20G194900	GLYMA_17G038700	GLYMA_17G047700	GLYMA_08G234900	GLYMA_06G310700	GLYMA_13G031000	GLYMA_08G307000	GLYMA_18G060900	GLYMA_05G188700		GLYMA_03G177300
GLYMA_19G214100	GLYMA_13G371100	GLYMA_14G048400	GLYMA_15G021200	GLYMA_U033600	GLYMA_06G270400	GLYMA_02G071700	GLYMA_04G103500	GLYMA_01G049400	GLYMA_16G169100		GLYMA_19G214100
GLYMA_13G342000	GLYMA_17G042900	GLYMA_03G206000	GLYMA_16G019500	GLYMA_18G275300	GLYMA_01G081900	GLYMA_09G031600	GLYMA_14G116300	GLYMA_03G206000	GLYMA_08G325200		GLYMA_13G342000
GLYMA_06G117800	GLYMA_01G124700	GLYMA_14G208000	GLYMA_03G221400	GLYMA_06G249800	GLYMA_09G138500	GLYMA_U033600	GLYMA_12G053800	GLYMA_10G000200	GLYMA_10G196900		GLYMA_06G117800
GLYMA_13G085500	GLYMA_06G134800	GLYMA_02G208200	GLYMA_06G030500	GLYMA_02G148200	GLYMA_12G013200	GLYMA_19G034900	GLYMA_09G216600	GLYMA_12G081400	GLYMA_20G090500		GLYMA_13G085500
GLYMA_14G174600	GLYMA_19G050800	GLYMA_10G158300	GLYMA_04G223100	GLYMA_14G109200	GLYMA_19G178000	GLYMA_02G293900	GLYMA_06G324100	GLYMA_07G207400	GLYMA_12G199800		GLYMA_14G174600
GLYMA_03G168200	GLYMA_17G086500	GLYMA_13G104100	GLYMA_07G087100	GLYMA_09G191800	GLYMA_17G013400	GLYMA_18G275300	GLYMA_15G113200	GLYMA_19G150900	GLYMA_02G043200		GLYMA_03G168200
GLYMA_05G188600	GLYMA_17G048700	GLYMA_06G080200	GLYMA_20G097100	GLYMA_10G288400	GLYMA_11G174100	GLYMA_08G052400	GLYMA_05G228100	GLYMA_07G032300	GLYMA_07G141300		GLYMA_05G188600
GLYMA_19G200900	GLYMA_20G162600	GLYMA_05G007400	GLYMA_06G142300	GLYMA_16G076100	GLYMA_04G104500	GLYMA_04G179600	GLYMA_07G244400	GLYMA_15G011700	GLYMA_06G142300		GLYMA_19G200900
GLYMA_08G306600	GLYMA_16G173100	GLYMA_01G137000	GLYMA_19G175800	GLYMA_13G101200	GLYMA_18G018600	GLYMA_03G064100	GLYMA_13G294800	GLYMA_08G241600	GLYMA_14G051000		GLYMA_08G306600
GLYMA_11G253200	GLYMA_10G154200	GLYMA_03G042700	GLYMA_09G056600	GLYMA_06G206800	GLYMA_03G201700	GLYMA_03G237700	GLYMA_08G319200	GLYMA_17G065100	GLYMA_19G110600		GLYMA_11G253200
GLYMA_06G125600	GLYMA_05G056000	GLYMA_07G201000	GLYMA_02G145100	GLYMA_08G306600	GLYMA_02G143300	GLYMA_06G271400	GLYMA_03G050500	GLYMA_08G028800	GLYMA_09G278200		GLYMA_06G125600
GLYMA_13G371500	GLYMA_18G141900	GLYMA_19G156000	GLYMA_04G067100	GLYMA_10G189400	GLYMA_07G260100	GLYMA_08G234900	GLYMA_16G216800	GLYMA_04G030400	GLYMA_02G241800		GLYMA_13G371500
GLYMA_14G222400	GLYMA_16G221500	GLYMA_02G147800	GLYMA_16G034300	ENSRNA050002918	GLYMA_04G190500	GLYMA_11G256100	GLYMA_16G210300	GLYMA_12G224600	GLYMA_05G149700		GLYMA_14G222400
GLYMA_20G045800	GLYMA_14G072500	GLYMA_01G166300	GLYMA_14G025500	GLYMA_08G189800	GLYMA_03G237800	GLYMA_06G235000	GLYMA_16G156500	GLYMA_05G228100	GLYMA_09G136400		GLYMA_20G045800
GLYMA_13G233900	GLYMA_13G208400	GLYMA_01G181700	GLYMA_11G160000	GLYMA_10G026100	GLYMA_13G253100	GLYMA_04G043600	GLYMA_13G228900	GLYMA_01G036000	GLYMA_02G001000		GLYMA_13G233900
GLYMA_11G202800	GLYMA_03G062500	GLYMA_14G067000	GLYMA_11G221000	GLYMA_05G075700	GLYMA_07G271200	GLYMA_11G083600	GLYMA_06G113500	GLYMA_19G195300	GLYMA_03G134900		GLYMA_11G202800
GLYMA_08G284800	GLYMA_08G070300	GLYMA_16G120200	GLYMA_11G074200	GLYMA_19G235300	GLYMA_08G325200	GLYMA_06G125600	GLYMA_13G191900	GLYMA_18G091300	GLYMA_13G029300		GLYMA_08G284800
GLYMA_08G008700	GLYMA_02G218200	GLYMA_13G303700	GLYMA_11G247400	GLYMA_19G042100	GLYMA_19G210700	GLYMA_19G159000	GLYMA_06G083600	GLYMA_05G175500	GLYMA_02G013500		GLYMA_08G008700
GLYMA_09G008800	GLYMA_04G060600	GLYMA_03G008100	GLYMA_12G035700	GLYMA_15G011700	GLYMA_06G301200	GLYMA_U041200	GLYMA_07G224100	GLYMA_03G221300	GLYMA_13G029200		GLYMA_09G008800
GLYMA_18G266200	GLYMA_09G273800	GLYMA_20G142900	GLYMA_02G156800	GLYMA_19G051100	GLYMA_05G210900	GLYMA_06G324100	GLYMA_07G022400	GLYMA_07G070200	GLYMA_13G108500		GLYMA_18G266200
GLYMA_15G239600	GLYMA_14G090200	GLYMA_18G222900	GLYMA_15G057700	GLYMA_20G151800	GLYMA_01G038600	GLYMA_13G051900	GLYMA_05G004600	GLYMA_03G237800	GLYMA_20G234100		GLYMA_15G239600
GLYMA_06G049500	GLYMA_08G325200	GLYMA_07G155500	GLYMA_07G055000	GLYMA_11G059200	GLYMA_14G011100	GLYMA_08G127900	GLYMA_10G065200	GLYMA_20G150600	GLYMA_03G129300		GLYMA_06G049500
GLYMA_01G190000	GLYMA_05G072200	GLYMA_03G145500	GLYMA_04G133500	GLYMA_03G116200	GLYMA_19G023200	GLYMA_17G006900	GLYMA_01G047800	GLYMA_11G253900	GLYMA_18G205000		GLYMA_01G190000
ENSRNA050030700	GLYMA_01G209600	GLYMA_02G051300	GLYMA_20G115900	GLYMA_01G047800	GLYMA_14G097000	GLYMA_01G129100	GLYMA_03G143500	GLYMA_14G220600	GLYMA_01G243200		ENSRNA050030700
GLYMA_09G138100	GLYMA_09G028100	GLYMA_01G098700	GLYMA_08G206300	GLYMA_10G014100	GLYMA_16G122700	GLYMA_03G259200	GLYMA_02G051700	GLYMA_05G028700	GLYMA_14G031200		GLYMA_09G138100
GLYMA_06G017600	ENSRNA050002918	GLYMA_04G079400	GLYMA_15G062300	GLYMA_14G004800	GLYMA_08G279600	GLYMA_02G045900	GLYMA_02G309200	GLYMA_15G019300	GLYMA_10G028900		GLYMA_06G017600
GLYMA_20G006200	GLYMA_04G028700	GLYMA_08G089800	GLYMA_14G031200	GLYMA_15G069900	GLYMA_04G200500	GLYMA_04G047600	GLYMA_10G288400	GLYMA_20G035200	GLYMA_08G170500		GLYMA_20G006200
GLYMA_09G184000	GLYMA_09G010700	GLYMA_19G032100	GLYMA_03G116700	GLYMA_10G259800	GLYMA_11G160600	GLYMA_12G233500	GLYMA_06G297400	GLYMA_03G134900	GLYMA_11G247500		GLYMA_09G184000
GLYMA_20G049800	GLYMA_02G268200	GLYMA_04G004600	GLYMA_18G059300	GLYMA_15G146800	GLYMA_15G034600	GLYMA_16G156500	GLYMA_03G145500	GLYMA_19G260300	GLYMA_13G214400		GLYMA_20G049800
GLYMA_20G139500	GLYMA_03G237800	GLYMA_04G048500	GLYMA_13G213800	GLYMA_20G231800	GLYMA_20G221400	GLYMA_16G126400	GLYMA_13G108500	GLYMA_04G175900	GLYMA_06G061900		GLYMA_20G139500
GLYMA_07G180600	GLYMA_10G033500	GLYMA_03G021700	GLYMA_11G212400	GLYMA_05G028700	GLYMA_17G099800	GLYMA_08G174300	GLYMA_17G099800	GLYMA_01G179400	GLYMA_12G221000		GLYMA_07G180600
GLYMA_03G062500	GLYMA_06G290300	GLYMA_20G100500	GLYMA_02G051700	GLYMA_07G238400	GLYMA_03G172000	GLYMA_08G319200	GLYMA_06G176700	GLYMA_18G094300	GLYMA_09G155700		GLYMA_03G062500
GLYMA_13G222000	GLYMA_07G155500	GLYMA_11G104200	GLYMA_14G069100	GLYMA_16G153600	GLYMA_12G021800	GLYMA_07G254000	GLYMA_17G031500	GLYMA_17G127200	GLYMA_14G133100		GLYMA_13G222000
GLYMA_03G217800	GLYMA_13G053000	GLYMA_14G056300	GLYMA_15G276100	GLYMA_15G004100	GLYMA_15G032600	GLYMA_04G165900	GLYMA_09G140600	GLYMA_02G107400	GLYMA_04G209200		GLYMA_03G217800
GLYMA_12G004600	GLYMA_07G200200	GLYMA_14G004800	GLYMA_14G067000	GLYMA_05G150500	GLYMA_16G023500	GLYMA_06G049500	GLYMA_02G156000	GLYMA_20G130300	GLYMA_14G213100		GLYMA_12G004600
GLYMA_02G043200	GLYMA_01G208000	GLYMA_08G333800	GLYMA_02G007300	GLYMA_13G305300	GLYMA_01G229600	GLYMA_08G163100	GLYMA_08G180400	GLYMA_10G288400	GLYMA_01G137000		GLYMA_02G043200
GLYMA_13G310700	GLYMA_15G100100	GLYMA_12G039200	GLYMA_10G249600	GLYMA_20G203500	GLYMA_05G050200	GLYMA_17G031500	GLYMA_10G263500	GLYMA_20G193800	GLYMA_05G203000		GLYMA_13G310700
GLYMA_15G046900	GLYMA_18G153500	GLYMA_18G187100	GLYMA_20G224300	GLYMA_06G324100	GLYMA_14G011700	GLYMA_08G039400	GLYMA_10G242300	GLYMA_19G123500	GLYMA_17G238200		GLYMA_15G046900
GLYMA_15G146800	GLYMA_06G194000	GLYMA_06G176700	GLYMA_13G133200	GLYMA_02G147500	GLYMA_10G031200	GLYMA_06G063200	GLYMA_06G235000	GLYMA_07G200200	GLYMA_03G016400		GLYMA_15G146800
GLYMA_08G024400	GLYMA_08G024400	GLYMA_15G069900	GLYMA_19G195300	GLYMA_11G215600	GLYMA_13G215400	GLYMA_14G067000	GLYMA_19G258000	GLYMA_06G097300	GLYMA_09G234900		GLYMA_08G024400
GLYMA_02G296800	GLYMA_10G076000	GLYMA_09G059800	GLYMA_16G151200	GLYMA_01G132700	GLYMA_17G166900	GLYMA_12G044700	GLYMA_05G119300	GLYMA_19G032100	GLYMA_03G129200		GLYMA_02G296800
GLYMA_06G249800	GLYMA_07G259400	GLYMA_18G210900	GLYMA_19G127200	GLYMA_09G192700	GLYMA_16G181900	GLYMA_01G150000	GLYMA_05G218300	GLYMA_04G250900	GLYMA_12G081400		GLYMA_06G249800
GLYMA_15G144100	GLYMA_10G028300	GLYMA_19G192500	GLYMA_01G102200	GLYMA_16G177600	GLYMA_19G214100	GLYMA_10G052100	GLYMA_16G217000	GLYMA_12G221000	GLYMA_02G272100		GLYMA_15G144100
GLYMA_14G007000	GLYMA_09G029600	GLYMA_18G048400	GLYMA_18G272200	GLYMA_20G135500	GLYMA_06G187000	GLYMA_01G217400	GLYMA_02G137900	GLYMA_04G080600	GLYMA_04G001100		GLYMA_14G007000
GLYMA_15G077600	GLYMA_06G063700	GLYMA_11G057800	GLYMA_10G063100	GLYMA_08G174300	GLYMA_15G061700	GLYMA_13G369900	GLYMA_17G038700	GLYMA_03G021700	GLYMA_06G194000		GLYMA_15G077600
GLYMA_15G239700	GLYMA_13G303700	GLYMA_13G310000	GLYMA_08G019000	GLYMA_10G197800	GLYMA_10G000200	GLYMA_02G063400	GLYMA_13G280500	GLYMA_13G276700	GLYMA_11G095700		GLYMA_15G239700
GLYMA_04G013400	GLYMA_08G038300	GLYMA_10G028900	GLYMA_13G215400	GLYMA_03G184000	GLYMA_04G075700	GLYMA_04G004800	GLYMA_15G118500	GLYMA_15G025400	GLYMA_16G174300		GLYMA_04G013400
GLYMA_06G202200	GLYMA_16G165600	GLYMA_09G022500	GLYMA_05G068100	GLYMA_06G242100	GLYMA_20G006600	GLYMA_10G066100	GLYMA_15G176500	GLYMA_01G197300	GLYMA_14G047200		GLYMA_06G202200
GLYMA_18G018400	GLYMA_06G166100	GLYMA_06G082300	GLYMA_16G007700	GLYMA_19G045700	GLYMA_14G147800	GLYMA_06G158000	GLYMA_02G228000	GLYMA_01G106100	GLYMA_04G007300		GLYMA_18G018400
GLYMA_08G303600	GLYMA_19G192500	GLYMA_10G211000	GLYMA_20G057500	GLYMA_01G191400	GLYMA_12G215700	GLYMA_01G006800	GLYMA_13G222000	GLYMA_06G294500	GLYMA_14G214500		GLYMA_08G303600
GLYMA_06G124400	GLYMA_11G100600	GLYMA_09G031600	GLYMA_13G208400	GLYMA_17G260200	GLYMA_11G219600	GLYMA_10G026800	GLYMA_08G240100	GLYMA_10G061300	GLYMA_02G267800		GLYMA_06G124400
GLYMA_02G010600	GLYMA_11G052200	GLYMA_16G156500	GLYMA_06G104700	GLYMA_10G213000	GLYMA_07G110900	GLYMA_12G105600	GLYMA_17G165300	GLYMA_02G074400	GLYMA_06G270400		GLYMA_02G010600
GLYMA_05G248800	GLYMA_06G081800	GLYMA_17G047700	GLYMA_10G061300	GLYMA_05G228100	GLYMA_14G201200	GLYMA_11G247400	GLYMA_11G084500	GLYMA_06G030500	GLYMA_08G010500		GLYMA_05G248800
GLYMA_13G253200	GLYMA_12G100600	GLYMA_18G078000	GLYMA_13G112500	GLYMA_12G011400	GLYMA_09G061300	GLYMA_16G200400	GLYMA_13G350000	GLYMA_04G084500	GLYMA_08G321100		GLYMA_13G253200
GLYMA_03G017500	GLYMA_17G076000	GLYMA_14G176400	GLYMA_13G305400	GLYMA_18G180900	GLYMA_05G102800	GLYMA_08G079100	GLYMA_02G148300	GLYMA_11G139800	GLYMA_05G014900		GLYMA_03G017500
GLYMA_11G247400	GLYMA_17G139000	GLYMA_13G051000	GLYMA_06G049500	GLYMA_15G046900	GLYMA_04G250900	GLYMA_09G138300	GLYMA_17G017200	GLYMA_13G264400	GLYMA_03G108000		GLYMA_11G247400
GLYMA_08G332900	GLYMA_18G271600	GLYMA_18G242400	GLYMA_13G131400	GLYMA_19G033900	GLYMA_16G216800	GLYMA_U001200	GLYMA_01G239800	GLYMA_20G213700	GLYMA_19G203500		GLYMA_08G332900
GLYMA_12G197600	GLYMA_12G018900	GLYMA_02G013500	GLYMA_16G044300	GLYMA_17G029500	GLYMA_09G056300	GLYMA_02G147500	GLYMA_01G036000	GLYMA_09G087300	GLYMA_10G063100		GLYMA_12G197600
GLYMA_15G192100	GLYMA_07G227300	GLYMA_20G203100	GLYMA_03G165200	GLYMA_15G077600	GLYMA_06G235500	GLYMA_16G023500	GLYMA_17G073400	GLYMA_01G038600	GLYMA_15G063200		GLYMA_15G192100
GLYMA_08G227700	GLYMA_18G139900	GLYMA_09G010800	GLYMA_13G087100	GLYMA_12G023200	GLYMA_08G356800	GLYMA_05G050400	GLYMA_19G037600	GLYMA_12G236600	GLYMA_04G173200		GLYMA_08G227700
GLYMA_13G151800	GLYMA_13G049700	GLYMA_15G011700	GLYMA_16G057400	GLYMA_18G005500	GLYMA_13G096200	GLYMA_11G044700	GLYMA_18G180900	GLYMA_19G034900	GLYMA_15G089100		GLYMA_13G151800
GLYMA_04G052200	GLYMA_15G100900	GLYMA_15G264100	GLYMA_05G245900	GLYMA_06G113300	GLYMA_10G182800	GLYMA_15G004300	GLYMA_07G017000	GLYMA_08G066800	GLYMA_06G215200		GLYMA_04G052200
GLYMA_13G256600	GLYMA_14G146900	GLYMA_20G203500	GLYMA_12G015300	GLYMA_16G113000	GLYMA_14G051900	GLYMA_15G057700	GLYMA_10G052200	GLYMA_11G084500	GLYMA_11G220300		GLYMA_13G256600
GLYMA_14G194300	GLYMA_08G062500	GLYMA_05G138100	GLYMA_14G088300	GLYMA_13G051900	GLYMA_12G052100	GLYMA_05G055400	GLYMA_06G163200	GLYMA_16G141500	GLYMA_08G053700		GLYMA_14G194300
GLYMA_04G022100	GLYMA_20G216300	GLYMA_18G228100	GLYMA_11G075100	GLYMA_13G053300	GLYMA_11G176000	GLYMA_09G273800	GLYMA_14G004800	GLYMA_14G213100	GLYMA_05G188600		GLYMA_04G022100
GLYMA_18G271400	GLYMA_05G241900	GLYMA_18G284400	GLYMA_07G215900	GLYMA_04G132700	GLYMA_06G136800	GLYMA_18G057800	GLYMA_12G023800	GLYMA_16G153600	ENSRNA049760259		GLYMA_18G271400
GLYMA_07G070200	GLYMA_11G219600	GLYMA_12G096700	GLYMA_11G195000	GLYMA_06G072900	GLYMA_08G243100	GLYMA_15G192100	GLYMA_11G104200	GLYMA_16G175500	GLYMA_17G020900		GLYMA_07G070200
GLYMA_12G015300	GLYMA_01G072800	GLYMA_01G219100	GLYMA_09G129900	GLYMA_14G068300	GLYMA_11G166900	GLYMA_03G063000	GLYMA_05G096800	GLYMA_06G033100	GLYMA_03G047100		GLYMA_12G015300
GLYMA_20G234100	GLYMA_09G031400	GLYMA_18G236700	GLYMA_06G310700	GLYMA_14G048200	GLYMA_13G345900	GLYMA_19G005900	GLYMA_06G290500	GLYMA_09G184000	GLYMA_14G016800		GLYMA_20G234100
GLYMA_08G132700	GLYMA_02G048700	GLYMA_09G281100	GLYMA_12G076800	GLYMA_09G237000	GLYMA_07G091400	GLYMA_17G094500	GLYMA_04G220700	GLYMA_11G033900	GLYMA_20G194900		GLYMA_08G132700
GLYMA_18G242400	GLYMA_17G044100	GLYMA_02G293900	GLYMA_06G283500	GLYMA_12G105600	GLYMA_11G192600	GLYMA_17G210500	GLYMA_08G052400	GLYMA_02G228000	GLYMA_15G177900		GLYMA_18G242400
GLYMA_09G126100	GLYMA_16G194400	GLYMA_11G083600	GLYMA_03G227600	GLYMA_07G237500	GLYMA_16G124700	GLYMA_03G187000	GLYMA_03G196400	GLYMA_17G038700	GLYMA_08G295600		GLYMA_09G126100
GLYMA_04G079100	GLYMA_17G229900	GLYMA_03G083700	GLYMA_04G220700	GLYMA_03G163100	GLYMA_13G362200	GLYMA_01G180400	GLYMA_15G211600	GLYMA_12G001300	GLYMA_05G123400		GLYMA_04G079100
GLYMA_14G223000	GLYMA_06G289900	GLYMA_11G216000	GLYMA_05G169900	GLYMA_13G307000	GLYMA_07G260600	GLYMA_20G176100	GLYMA_04G136000	GLYMA_02G172800	GLYMA_18G108700		GLYMA_14G223000
GLYMA_20G191600	GLYMA_05G138400	GLYMA_04G137600	GLYMA_13G081000	GLYMA_07G151600	GLYMA_11G165700	GLYMA_15G264100	GLYMA_14G216000	GLYMA_06G235500	GLYMA_14G132500		GLYMA_20G191600
GLYMA_03G196400	GLYMA_07G218900	GLYMA_05G096800	GLYMA_20G203500	GLYMA_08G221600	GLYMA_20G057500	GLYMA_17G099000	GLYMA_13G308000	GLYMA_15G149000	GLYMA_14G049700		GLYMA_03G196400
GLYMA_03G047100	GLYMA_15G061700	GLYMA_16G178800	GLYMA_03G259200	GLYMA_16G216800	GLYMA_19G123500	GLYMA_17G060600	GLYMA_05G020600	GLYMA_15G252800	GLYMA_05G214900		GLYMA_03G047100
GLYMA_03G153600	GLYMA_13G310700	GLYMA_13G300400	GLYMA_04G068300	GLYMA_01G036000	GLYMA_14G064000	GLYMA_06G033100	GLYMA_09G029400	GLYMA_15G128300	GLYMA_10G247300		GLYMA_03G153600
GLYMA_08G079100	GLYMA_05G188600	GLYMA_19G042100	GLYMA_05G210900	GLYMA_03G056800	GLYMA_04G246600	GLYMA_06G084700	GLYMA_01G071300	GLYMA_08G275500	GLYMA_20G212100		GLYMA_08G079100
GLYMA_07G070400	GLYMA_16G070300	GLYMA_11G073100	GLYMA_07G261800	GLYMA_18G152800	GLYMA_02G208200	GLYMA_13G346700	GLYMA_20G027900	GLYMA_14G176300	GLYMA_04G052600		GLYMA_07G070400
GLYMA_10G045500	GLYMA_05G246500	GLYMA_18G180900	GLYMA_18G272300	GLYMA_18G082000	GLYMA_03G217500	GLYMA_06G177400	GLYMA_08G210200	GLYMA_04G137600	GLYMA_05G050200		GLYMA_10G045500
GLYMA_14G047200	GLYMA_12G100100	GLYMA_11G216700	GLYMA_07G132100	GLYMA_10G035700	GLYMA_11G196400	GLYMA_04G004100	GLYMA_08G163100	GLYMA_06G160200	GLYMA_10G200800		GLYMA_14G047200
GLYMA_15G069900	GLYMA_04G220700	GLYMA_14G220600	GLYMA_02G292800	GLYMA_02G056000	GLYMA_17G248600	GLYMA_13G147600	GLYMA_17G060600	GLYMA_10G263500	GLYMA_09G043200		GLYMA_15G069900
GLYMA_18G259100	GLYMA_19G115600	GLYMA_10G014100	GLYMA_08G021700	GLYMA_08G314700	GLYMA_09G229200	GLYMA_10G027600	GLYMA_07G016800	GLYMA_07G260100	GLYMA_18G064300		GLYMA_18G259100
GLYMA_16G141500	GLYMA_15G266100	GLYMA_15G210500	GLYMA_09G278700	GLYMA_20G129200	GLYMA_15G148300	GLYMA_07G207000	GLYMA_13G303000	GLYMA_16G018500	GLYMA_07G242700		GLYMA_16G141500
GLYMA_09G071300	GLYMA_20G058900	GLYMA_05G150500	GLYMA_19G043000	GLYMA_13G255800	GLYMA_02G311900	GLYMA_14G029900	GLYMA_13G298100	GLYMA_17G045600	GLYMA_07G167000		GLYMA_09G071300
GLYMA_03G163100	GLYMA_13G079900	GLYMA_01G071300	GLYMA_09G028400	GLYMA_09G138500	GLYMA_09G187700	GLYMA_11G048400	GLYMA_14G047500	GLYMA_04G223600	GLYMA_07G259400		GLYMA_03G163100
GLYMA_04G238300	GLYMA_03G217500	GLYMA_16G133400	GLYMA_06G249800	GLYMA_16G010500	GLYMA_02G277600	GLYMA_15G181800	GLYMA_18G278100	GLYMA_07G151600	GLYMA_02G017100		GLYMA_04G238300
GLYMA_08G335700	GLYMA_01G081900	GLYMA_20G126700	GLYMA_18G067600	GLYMA_13G343000	GLYMA_18G037800	GLYMA_06G174600	GLYMA_15G011000	GLYMA_07G067300	GLYMA_06G072900		GLYMA_08G335700
GLYMA_16G042000	GLYMA_15G022000	GLYMA_18G274200	GLYMA_15G215600	GLYMA_01G159700	GLYMA_19G192900	GLYMA_09G263100	GLYMA_20G216700	GLYMA_05G161500	GLYMA_10G017000		GLYMA_16G042000
GLYMA_14G096700	GLYMA_11G008300	GLYMA_12G063400	GLYMA_18G257900	GLYMA_15G176500	GLYMA_09G184000	GLYMA_06G112700	GLYMA_02G185400	GLYMA_07G159100	GLYMA_13G087500		GLYMA_14G096700
GLYMA_11G092600	GLYMA_17G123400	GLYMA_07G069500	GLYMA_11G244200	GLYMA_06G042500	GLYMA_08G201700	GLYMA_02G095600	GLYMA_20G238300	GLYMA_10G136700	GLYMA_01G208000		GLYMA_11G092600
ENSRNA050030470	GLYMA_18G207900	GLYMA_20G137700	GLYMA_09G206300	GLYMA_13G350000	GLYMA_02G097000	GLYMA_13G131400	GLYMA_12G064300	GLYMA_10G014100	GLYMA_09G068700		ENSRNA050030470
GLYMA_07G132100	GLYMA_04G094400	GLYMA_06G166100	GLYMA_08G278700	GLYMA_04G115600	GLYMA_05G228400	GLYMA_10G200800	GLYMA_02G034500	GLYMA_15G154900	GLYMA_05G237200		GLYMA_07G132100
GLYMA_11G233500	GLYMA_15G024300	GLYMA_14G053700	GLYMA_07G181200	GLYMA_12G116400	GLYMA_09G008800	GLYMA_19G184900	GLYMA_07G248100	GLYMA_03G141900	GLYMA_19G042100		GLYMA_11G233500
GLYMA_08G144500	GLYMA_06G006100	GLYMA_11G170000	GLYMA_07G139600	GLYMA_02G189700	GLYMA_03G225500	GLYMA_06G037900	GLYMA_08G144400	GLYMA_02G157700	GLYMA_11G012400		GLYMA_08G144500
GLYMA_18G238000	GLYMA_04G196100	GLYMA_08G174300	GLYMA_14G072300	GLYMA_03G041300	GLYMA_07G248100	GLYMA_06G166100	GLYMA_13G304100	GLYMA_07G133800	GLYMA_20G119400		GLYMA_18G238000
GLYMA_13G281600	GLYMA_03G184000	GLYMA_02G308300	GLYMA_12G121000	GLYMA_06G170400	GLYMA_20G150300	GLYMA_01G195500	GLYMA_18G038000	GLYMA_02G145100	GLYMA_13G225100		GLYMA_13G281600
GLYMA_03G056800	GLYMA_12G197600	GLYMA_07G079600	GLYMA_12G232800	GLYMA_09G043900	GLYMA_08G336300	GLYMA_01G232400	GLYMA_03G109300	GLYMA_06G290500	GLYMA_13G087100		GLYMA_03G056800
GLYMA_09G268800	GLYMA_12G192300	GLYMA_04G047900	GLYMA_14G007900	GLYMA_07G014600	GLYMA_10G243800	GLYMA_13G081000	GLYMA_02G259200	GLYMA_04G045800	GLYMA_03G153600		GLYMA_09G268800
GLYMA_08G200600	GLYMA_09G039800	GLYMA_08G052400	GLYMA_11G238800	GLYMA_05G169000	GLYMA_06G000600	GLYMA_04G200500	GLYMA_18G099500	GLYMA_18G041300	GLYMA_06G124400		GLYMA_08G200600
GLYMA_17G089300	GLYMA_10G076100	GLYMA_11G241900	GLYMA_08G039400	GLYMA_04G163200	GLYMA_19G128800	GLYMA_18G045300	GLYMA_13G080500	GLYMA_11G143100	GLYMA_11G221000		GLYMA_17G089300
GLYMA_10G136500	GLYMA_17G089300	GLYMA_13G062500	GLYMA_18G009800	GLYMA_13G062500	GLYMA_02G157700	GLYMA_06G043900	GLYMA_17G029500	GLYMA_08G234900	GLYMA_14G154200		GLYMA_10G136500
GLYMA_14G181800	GLYMA_02G268300	GLYMA_19G250400	GLYMA_20G085900	GLYMA_13G228300	GLYMA_08G261000	GLYMA_15G133900	GLYMA_18G272200	GLYMA_16G156500	GLYMA_20G130300		GLYMA_14G181800
GLYMA_08G119200	GLYMA_04G182300	GLYMA_12G171100	GLYMA_15G056000	GLYMA_15G133900	GLYMA_01G022300	GLYMA_11G166500	GLYMA_02G028800	GLYMA_03G237600	GLYMA_06G290500		GLYMA_08G119200
GLYMA_20G150600	GLYMA_09G087100	GLYMA_12G044700	GLYMA_14G053100	GLYMA_17G060600	GLYMA_18G261800	GLYMA_07G070200	GLYMA_10G011000	GLYMA_13G305400	GLYMA_09G069900		GLYMA_20G150600
GLYMA_18G025300	GLYMA_02G227200	GLYMA_08G000800	GLYMA_11G251800	GLYMA_13G288000	GLYMA_04G060600	GLYMA_18G040200	GLYMA_16G016900	GLYMA_19G104200	GLYMA_08G366700		GLYMA_18G025300
GLYMA_12G171100	GLYMA_15G273700	GLYMA_20G062500	GLYMA_13G079900	GLYMA_08G254400	GLYMA_08G073300	GLYMA_04G052200	GLYMA_03G154200	GLYMA_08G033100	GLYMA_02G261400		GLYMA_12G171100
ENSRNA050030627	GLYMA_17G075100	GLYMA_01G085800	GLYMA_02G172800	GLYMA_06G308100	GLYMA_15G084600	GLYMA_19G043000	GLYMA_11G160600	GLYMA_05G214300	GLYMA_18G284900		ENSRNA050030627
GLYMA_15G221600	GLYMA_10G179400	GLYMA_04G100600	GLYMA_03G153600	GLYMA_06G084700	GLYMA_02G283500	GLYMA_10G077800	GLYMA_04G022100	GLYMA_03G083700	GLYMA_16G063400		GLYMA_15G221600
GLYMA_07G215500	GLYMA_05G166900	GLYMA_07G100400	GLYMA_12G052100	GLYMA_08G109500	GLYMA_08G071100	GLYMA_16G010500	GLYMA_06G022800	GLYMA_07G215500	GLYMA_20G076300		GLYMA_07G215500
GLYMA_09G060400	GLYMA_15G055800	GLYMA_04G238300	GLYMA_15G057600	GLYMA_12G013100	GLYMA_01G187400	GLYMA_08G042000	GLYMA_11G215600	GLYMA_12G116400	GLYMA_08G227700		GLYMA_09G060400
GLYMA_01G195900	GLYMA_10G015500	GLYMA_10G189400	GLYMA_05G175500	GLYMA_08G319200	GLYMA_04G255600	GLYMA_15G077600	GLYMA_13G069900	GLYMA_11G158800	GLYMA_10G002200		GLYMA_01G195900
GLYMA_09G039800	GLYMA_15G144100	GLYMA_07G101000	GLYMA_15G162800	GLYMA_02G093400	GLYMA_02G212000	GLYMA_11G059900	GLYMA_05G027500	GLYMA_16G216800	GLYMA_03G152500		GLYMA_09G039800
GLYMA_18G284900	GLYMA_06G171700	GLYMA_03G007000	GLYMA_01G143800	GLYMA_07G039000	GLYMA_17G020900	GLYMA_03G134900	GLYMA_14G133100	GLYMA_05G192700	GLYMA_02G071700		GLYMA_18G284900
GLYMA_18G139900	GLYMA_09G011700	GLYMA_14G064600	GLYMA_04G028600	GLYMA_08G213100	GLYMA_07G215500	GLYMA_07G256900	GLYMA_19G159000	GLYMA_12G178900	GLYMA_17G075300		GLYMA_18G139900
GLYMA_02G141100	GLYMA_09G204100	GLYMA_18G206000	GLYMA_15G024600	GLYMA_19G258000	GLYMA_07G139700	GLYMA_20G147700	GLYMA_18G271600	GLYMA_18G261800	GLYMA_17G165300		GLYMA_02G141100
GLYMA_09G042900	ENSRNA050002131	GLYMA_14G068300	GLYMA_02G241800	GLYMA_03G190400	GLYMA_02G292800	GLYMA_11G215600	GLYMA_20G197700	GLYMA_18G271300	GLYMA_13G325900		GLYMA_09G042900
GLYMA_06G317800	GLYMA_16G153600	GLYMA_07G050000	GLYMA_09G237000	GLYMA_15G144700	GLYMA_20G179700	GLYMA_06G296700	GLYMA_15G192100	GLYMA_13G241900	GLYMA_17G047700		GLYMA_06G317800
GLYMA_07G096500	GLYMA_04G165900	GLYMA_19G258000	GLYMA_03G183100	GLYMA_13G088300	GLYMA_08G078500	GLYMA_05G218300	GLYMA_12G236600	GLYMA_03G146100	GLYMA_11G143100		GLYMA_07G096500
GLYMA_09G259500	GLYMA_07G237500	GLYMA_07G025800	GLYMA_16G074200	GLYMA_03G041200	GLYMA_14G154200	GLYMA_08G229100	GLYMA_13G051000	GLYMA_14G197500	GLYMA_09G170500		GLYMA_09G259500
GLYMA_19G147200	GLYMA_03G187000	GLYMA_12G015300	GLYMA_17G132100	GLYMA_08G289300	GLYMA_13G305100	GLYMA_12G023300	GLYMA_17G046700	GLYMA_20G123000	GLYMA_06G116100		GLYMA_19G147200
GLYMA_06G027200	GLYMA_08G147900	GLYMA_05G025600	GLYMA_02G199500	GLYMA_20G059200	GLYMA_08G035000	GLYMA_08G205600	GLYMA_16G145000	GLYMA_01G054100	GLYMA_11G158800		GLYMA_06G027200
GLYMA_06G166100	GLYMA_12G215700	GLYMA_08G042000	GLYMA_02G204700	GLYMA_13G355600	GLYMA_03G175100	GLYMA_02G241800	GLYMA_11G174100	GLYMA_08G252700	GLYMA_10G189700		GLYMA_06G166100
GLYMA_02G016500	GLYMA_04G009600	GLYMA_05G210900	GLYMA_06G184900	GLYMA_18G006800	GLYMA_10G041800	GLYMA_06G061700	GLYMA_15G264100	GLYMA_04G220700	GLYMA_08G246700		GLYMA_02G016500
GLYMA_16G023500	GLYMA_15G063000	GLYMA_U033600	GLYMA_02G184700	GLYMA_10G011000	GLYMA_03G038700	GLYMA_17G231900	GLYMA_08G253400	GLYMA_04G028600	GLYMA_11G100600		GLYMA_16G023500
GLYMA_14G067000	GLYMA_04G178500	GLYMA_02G071700	GLYMA_10G016500	GLYMA_04G178900	GLYMA_02G259200	GLYMA_02G010600	GLYMA_02G261400	GLYMA_20G076300	GLYMA_07G096500		GLYMA_14G067000
GLYMA_07G083200	GLYMA_19G055400	GLYMA_19G257400	GLYMA_02G202200	GLYMA_18G277500	GLYMA_20G241600	GLYMA_06G297400	GLYMA_12G216300	GLYMA_13G368700	GLYMA_13G149100		GLYMA_07G083200
GLYMA_12G023800	GLYMA_03G166000	GLYMA_19G005900	GLYMA_08G147900	GLYMA_10G249600	GLYMA_08G056400	GLYMA_05G169600	GLYMA_03G154000	GLYMA_04G048600	GLYMA_10G237800		GLYMA_12G023800
GLYMA_17G008800	GLYMA_06G022800	GLYMA_20G057500	GLYMA_17G155600	GLYMA_10G067100	GLYMA_12G076800	GLYMA_10G258300	GLYMA_02G128000	GLYMA_13G342000	GLYMA_13G294800		GLYMA_17G008800
GLYMA_10G152400	GLYMA_05G085400	GLYMA_13G265500	GLYMA_16G100800	GLYMA_03G116000	GLYMA_13G281900	GLYMA_11G141700	GLYMA_15G030500	GLYMA_02G292800	GLYMA_14G181500		GLYMA_10G152400
GLYMA_16G188900	GLYMA_19G144500	GLYMA_14G063300	GLYMA_02G252600	GLYMA_05G056100	GLYMA_05G161200	GLYMA_08G329900	GLYMA_18G273000	GLYMA_08G180900	GLYMA_20G050500		GLYMA_16G188900
GLYMA_08G358600	GLYMA_15G118500	GLYMA_03G200400	GLYMA_15G184400	GLYMA_09G229200	GLYMA_06G061700	GLYMA_17G111100	GLYMA_09G022000	GLYMA_15G056000	GLYMA_20G062500		GLYMA_08G358600
GLYMA_08G062500	GLYMA_17G187200	GLYMA_05G169600	GLYMA_10G052100	GLYMA_02G092500	GLYMA_18G034100	GLYMA_14G096700	GLYMA_06G196600	GLYMA_04G169400	GLYMA_10G062600		GLYMA_08G062500
GLYMA_08G239400	GLYMA_14G132100	GLYMA_18G165000	GLYMA_18G043900	GLYMA_13G206700	GLYMA_16G074200	GLYMA_04G196100	GLYMA_01G211000	GLYMA_19G258000	GLYMA_11G068900		GLYMA_08G239400
GLYMA_05G085400	GLYMA_19G096200	GLYMA_02G259200	GLYMA_04G179600	GLYMA_13G093900	GLYMA_15G141000	GLYMA_12G092500	GLYMA_09G259500	GLYMA_14G029700	GLYMA_12G132800		GLYMA_05G085400
GLYMA_14G176300	GLYMA_17G087900	GLYMA_11G032200	GLYMA_10G172600	GLYMA_09G131500	GLYMA_09G094000	GLYMA_08G210200	GLYMA_06G270400	GLYMA_02G071700	GLYMA_09G237700		GLYMA_14G176300
GLYMA_09G075200	GLYMA_05G203500	GLYMA_01G035000	GLYMA_18G037800	GLYMA_15G089100	GLYMA_19G205500	GLYMA_19G235200	GLYMA_08G074700	GLYMA_03G104700	GLYMA_04G003200		GLYMA_09G075200
GLYMA_11G022100	GLYMA_02G063400	GLYMA_06G148500	GLYMA_08G021100	GLYMA_15G267000	GLYMA_09G253200	GLYMA_09G061300	GLYMA_06G308100	GLYMA_14G200800	GLYMA_01G158000		GLYMA_11G022100
GLYMA_11G195000	GLYMA_09G229200	GLYMA_18G040200	GLYMA_07G010000	GLYMA_11G247400	GLYMA_04G177900	GLYMA_10G053000	GLYMA_07G218900	GLYMA_02G181600	GLYMA_14G003600		GLYMA_11G195000
GLYMA_18G222900	GLYMA_02G102600	GLYMA_02G128800	GLYMA_07G256900	GLYMA_11G238800	GLYMA_02G048700	GLYMA_16G152600	GLYMA_06G033100	GLYMA_03G184000	GLYMA_16G217700		GLYMA_18G222900
GLYMA_02G241800	GLYMA_02G208300	GLYMA_15G136700	GLYMA_05G246500	GLYMA_19G017000	GLYMA_16G038300	GLYMA_09G047300	GLYMA_17G094500	GLYMA_16G152900	GLYMA_17G005000		GLYMA_02G241800
GLYMA_12G219700	GLYMA_18G018600	GLYMA_03G198600	GLYMA_13G075700	GLYMA_10G077800	GLYMA_19G235400	GLYMA_02G212000	GLYMA_18G150600	GLYMA_08G253400	GLYMA_13G321200		GLYMA_12G219700
GLYMA_02G218200	GLYMA_17G173800	GLYMA_19G156400	GLYMA_09G020300	GLYMA_02G018900	GLYMA_04G215900	GLYMA_18G060900	GLYMA_08G213100	GLYMA_14G132500	GLYMA_U038600		GLYMA_02G218200
GLYMA_04G132700	GLYMA_10G252500	GLYMA_17G104000	GLYMA_17G021400	GLYMA_06G184900	GLYMA_18G275300	GLYMA_10G014100	GLYMA_07G155500	GLYMA_04G209200	GLYMA_16G138600		GLYMA_04G132700
GLYMA_15G176500	GLYMA_14G067800	GLYMA_09G204100	ENSRNA050030562	GLYMA_03G259200	GLYMA_11G247400	GLYMA_05G020600	GLYMA_01G108200	GLYMA_11G068700	GLYMA_19G033800		GLYMA_15G176500
GLYMA_02G002100	GLYMA_19G017000	GLYMA_10G017000	GLYMA_19G104200	GLYMA_04G004600	GLYMA_08G021700	GLYMA_05G096800	GLYMA_13G354400	GLYMA_13G288500	GLYMA_18G013200		GLYMA_02G002100
GLYMA_12G116400	GLYMA_02G074400	GLYMA_03G056800	GLYMA_08G017000	GLYMA_10G011500	GLYMA_18G215500	GLYMA_13G208000	GLYMA_08G284800	GLYMA_13G321900	GLYMA_08G003400		GLYMA_12G116400
GLYMA_02G013000	GLYMA_08G180900	GLYMA_04G190600	GLYMA_15G134400	GLYMA_02G261900	GLYMA_03G104700	GLYMA_11G109200	GLYMA_17G231900	GLYMA_11G234000	GLYMA_07G099100		GLYMA_02G013000
GLYMA_06G116100	GLYMA_19G151300	GLYMA_05G050400	GLYMA_07G176400	GLYMA_17G065300	GLYMA_01G230900	GLYMA_12G207400	GLYMA_13G051900	GLYMA_18G259600	GLYMA_06G105200		GLYMA_06G116100
GLYMA_08G251900	GLYMA_08G299200	GLYMA_06G163200	GLYMA_03G029800	GLYMA_11G109200	GLYMA_12G197600	GLYMA_20G196000	GLYMA_01G131400	GLYMA_06G082300	GLYMA_09G043400		GLYMA_08G251900
GLYMA_13G040400	GLYMA_13G034700	GLYMA_16G166000	GLYMA_18G111400	GLYMA_12G236600	GLYMA_08G220800	GLYMA_13G280500	GLYMA_11G228000	GLYMA_08G255200	GLYMA_10G067100		GLYMA_13G040400
GLYMA_05G055400	GLYMA_08G227700	GLYMA_18G275300	GLYMA_16G014100	GLYMA_08G227200	GLYMA_14G051000	GLYMA_14G011700	GLYMA_02G264900	GLYMA_07G091400	GLYMA_13G087400		GLYMA_05G055400
GLYMA_13G114200	GLYMA_12G163400	GLYMA_14G051900	GLYMA_14G221500	GLYMA_12G199300	GLYMA_17G050900	GLYMA_02G013500	GLYMA_06G148500	GLYMA_16G210300	GLYMA_18G048000		GLYMA_13G114200
GLYMA_18G064300	GLYMA_19G159000	GLYMA_05G175500	GLYMA_01G022300	GLYMA_04G255600	GLYMA_11G247500	GLYMA_06G236000	GLYMA_15G011700	GLYMA_07G181400	GLYMA_18G141700		GLYMA_18G064300
GLYMA_03G129300	GLYMA_20G017800	GLYMA_10G237800	GLYMA_04G208400	GLYMA_04G006400	GLYMA_18G225100	GLYMA_17G099800	GLYMA_14G170700	GLYMA_16G172400	GLYMA_08G180500		GLYMA_03G129300
GLYMA_14G221200	GLYMA_07G055000	GLYMA_06G177400	GLYMA_20G236100	GLYMA_15G252800	GLYMA_U029700	GLYMA_02G202500	GLYMA_03G157800	GLYMA_15G032300	GLYMA_13G038600		GLYMA_14G221200
GLYMA_13G132900	GLYMA_08G198900	GLYMA_08G103000	GLYMA_17G060400	GLYMA_17G047200	GLYMA_14G203900	GLYMA_07G032300	GLYMA_07G032300	GLYMA_05G225800	GLYMA_08G333800		GLYMA_13G132900
GLYMA_06G270400	GLYMA_14G213100	GLYMA_08G307400	GLYMA_02G227200	GLYMA_20G162200	GLYMA_03G206000	GLYMA_02G214300	GLYMA_11G241900	GLYMA_20G064200	GLYMA_03G148100		GLYMA_06G270400
GLYMA_11G058200	GLYMA_18G047200	GLYMA_03G206800	GLYMA_01G244600	GLYMA_02G034700	GLYMA_02G109700	GLYMA_13G066100	GLYMA_13G049700	GLYMA_12G192300	GLYMA_11G232000		GLYMA_11G058200
GLYMA_12G201400	GLYMA_17G045600	GLYMA_17G218900	GLYMA_06G103700	GLYMA_07G022400	GLYMA_13G214400	GLYMA_05G048400	GLYMA_14G063300	GLYMA_18G215500	GLYMA_06G104600		GLYMA_12G201400
GLYMA_10G090000	GLYMA_17G262300	GLYMA_08G175300	GLYMA_12G052500	GLYMA_03G131700	GLYMA_10G117200	GLYMA_07G136500	GLYMA_13G250900	GLYMA_08G227400	GLYMA_13G302500		GLYMA_10G090000
GLYMA_04G030400	GLYMA_11G043600	GLYMA_17G015400	GLYMA_09G032100	GLYMA_12G101800	GLYMA_01G212300	GLYMA_11G057800	GLYMA_05G214400	GLYMA_07G022400	GLYMA_11G241900		GLYMA_04G030400
GLYMA_15G056000	GLYMA_02G118100	GLYMA_04G182300	GLYMA_13G147700	GLYMA_18G270200	GLYMA_13G293700	GLYMA_16G034300	GLYMA_08G109400	GLYMA_07G110900	GLYMA_04G080600		GLYMA_15G056000
GLYMA_07G260600	GLYMA_10G138200	GLYMA_17G212200	GLYMA_04G048600	GLYMA_07G010000	GLYMA_04G001100	GLYMA_02G299800	GLYMA_08G201700	GLYMA_06G004500	GLYMA_13G114200		GLYMA_07G260600
GLYMA_06G142200	GLYMA_10G004700	GLYMA_02G299300	GLYMA_11G032200	GLYMA_05G154300	GLYMA_18G037900	GLYMA_15G118500	GLYMA_10G112800	GLYMA_02G046800	GLYMA_13G361900		GLYMA_06G142200
GLYMA_11G251800	GLYMA_11G243400	GLYMA_01G124100	GLYMA_08G109400	GLYMA_18G068400	GLYMA_15G069700	GLYMA_12G189300	GLYMA_05G149700	GLYMA_13G069900	GLYMA_12G121200		GLYMA_11G251800
GLYMA_15G256000	GLYMA_04G018400	GLYMA_12G023300	GLYMA_08G069300	GLYMA_06G096200	GLYMA_05G056600	GLYMA_12G080700	GLYMA_08G043600	GLYMA_16G217000	GLYMA_07G141500		GLYMA_15G256000
GLYMA_16G152600	GLYMA_09G138100	GLYMA_18G260500	GLYMA_13G278400	GLYMA_15G128300	GLYMA_18G043800	GLYMA_10G237800	GLYMA_04G249600	GLYMA_08G176600	GLYMA_15G201700		GLYMA_16G152600
GLYMA_04G179500	GLYMA_17G031500	GLYMA_07G207400	GLYMA_14G179200	GLYMA_02G302800	GLYMA_08G180400	GLYMA_06G240900	GLYMA_06G249800	GLYMA_03G202400	GLYMA_15G124000		GLYMA_04G179500
GLYMA_07G098900	GLYMA_11G095700	GLYMA_17G042800	GLYMA_03G057100	GLYMA_16G164200	GLYMA_10G194000	GLYMA_04G230400	GLYMA_20G186200	GLYMA_05G086400	GLYMA_07G143900		GLYMA_07G098900
GLYMA_13G245600	GLYMA_14G016800	GLYMA_15G176500	GLYMA_20G162600	GLYMA_15G114700	GLYMA_01G180400	GLYMA_15G104600	GLYMA_06G103700	GLYMA_08G210200	GLYMA_03G259200		GLYMA_13G245600
GLYMA_04G055500	GLYMA_13G222100	GLYMA_05G149700	GLYMA_14G126200	GLYMA_06G236000	GLYMA_13G276700	GLYMA_08G252700	GLYMA_14G011100	GLYMA_17G099800	GLYMA_11G141700		GLYMA_04G055500
GLYMA_20G231800	GLYMA_14G186600	GLYMA_12G056700	GLYMA_14G205200	GLYMA_20G050500	GLYMA_02G138200	GLYMA_04G182300	GLYMA_20G176600	GLYMA_13G243800	GLYMA_13G210600		GLYMA_20G231800
GLYMA_02G237100	GLYMA_03G202400	GLYMA_04G254500	GLYMA_13G255800	GLYMA_03G062500	GLYMA_11G235300	GLYMA_03G237800	GLYMA_20G100500	GLYMA_13G153400	GLYMA_01G191600		GLYMA_02G237100
GLYMA_08G118100	GLYMA_18G277500	GLYMA_06G102400	GLYMA_05G034000	GLYMA_10G192800	GLYMA_07G139600	GLYMA_07G100400	GLYMA_07G079600	GLYMA_18G111800	GLYMA_18G287000		GLYMA_08G118100
GLYMA_06G194000	GLYMA_13G303000	GLYMA_06G296300	GLYMA_08G227700	GLYMA_20G057500	GLYMA_19G035400	GLYMA_08G038300	GLYMA_02G237500	GLYMA_13G162900	GLYMA_02G026300		GLYMA_06G194000
ENSRNA050002932	GLYMA_16G170300	GLYMA_11G243400	GLYMA_07G108200	GLYMA_03G140700	GLYMA_10G066100	GLYMA_14G200700	GLYMA_13G345100	GLYMA_18G289600	GLYMA_11G056500		ENSRNA050002932
GLYMA_07G256900	GLYMA_06G241600	GLYMA_03G237800	GLYMA_10G211000	GLYMA_17G065400	GLYMA_02G034700	GLYMA_15G252800	GLYMA_08G008700	GLYMA_07G192200	GLYMA_14G040100		GLYMA_07G256900
GLYMA_15G032600	GLYMA_20G204800	GLYMA_20G135400	GLYMA_10G223700	GLYMA_06G107600	GLYMA_16G139400	GLYMA_13G305400	GLYMA_03G140700	GLYMA_02G016500	GLYMA_13G327100		GLYMA_15G032600
GLYMA_07G259400	GLYMA_13G228300	GLYMA_01G150000	GLYMA_09G011700	GLYMA_11G247700	GLYMA_03G227600	GLYMA_18G272200	GLYMA_02G212000	GLYMA_04G191100	GLYMA_09G111500		GLYMA_07G259400
GLYMA_15G005000	GLYMA_13G250800	GLYMA_15G150100	GLYMA_14G067400	GLYMA_02G071700	GLYMA_10G001800	GLYMA_06G143700	GLYMA_16G153600	GLYMA_10G035700	GLYMA_09G060400		GLYMA_15G005000
GLYMA_09G178600	GLYMA_12G013200	GLYMA_20G089900	GLYMA_13G250800	GLYMA_01G034900	GLYMA_05G166900	GLYMA_02G074500	GLYMA_02G261900	GLYMA_13G110800	GLYMA_02G089500		GLYMA_09G178600
GLYMA_04G173200	GLYMA_19G150900	GLYMA_02G264900	GLYMA_13G303700	GLYMA_13G298100	GLYMA_15G021200	GLYMA_12G236600	GLYMA_04G184500	GLYMA_02G209600	GLYMA_13G369900		GLYMA_04G173200
GLYMA_14G181500	GLYMA_12G116700	GLYMA_03G129200	GLYMA_11G243400	GLYMA_13G279800	GLYMA_06G113400	GLYMA_13G122100	GLYMA_18G277500	GLYMA_17G215400	GLYMA_18G275300		GLYMA_14G181500
GLYMA_07G139600	GLYMA_07G027300	GLYMA_20G151800	GLYMA_09G221500	GLYMA_02G264900	GLYMA_20G130400	GLYMA_19G028600	GLYMA_06G049500	GLYMA_03G201700	GLYMA_07G048100		GLYMA_07G139600
GLYMA_15G011700	GLYMA_13G362800	GLYMA_12G100600	GLYMA_18G278600	GLYMA_08G043600	GLYMA_08G079100	GLYMA_04G177800	GLYMA_13G243800	GLYMA_11G170000	GLYMA_10G053000		GLYMA_15G011700
GLYMA_15G276000	GLYMA_04G100400	GLYMA_13G304400	GLYMA_10G046300	GLYMA_12G080700	GLYMA_01G170200	GLYMA_02G308300	GLYMA_13G108300	GLYMA_06G114500	GLYMA_13G353800		GLYMA_15G276000
GLYMA_18G045300	GLYMA_06G316700	GLYMA_20G241700	GLYMA_01G201600	GLYMA_19G001400	GLYMA_08G195000	GLYMA_06G223300	GLYMA_09G134100	GLYMA_15G087100	GLYMA_12G204600		GLYMA_18G045300
GLYMA_09G155700	GLYMA_11G207900	GLYMA_14G058100	GLYMA_10G072000	GLYMA_13G053000	GLYMA_03G149200	GLYMA_01G132700	GLYMA_11G059200	GLYMA_03G157300	GLYMA_09G039800		GLYMA_09G155700
GLYMA_02G239000	GLYMA_19G186200	GLYMA_07G237500	GLYMA_20G059200	GLYMA_08G200900	GLYMA_07G266700	GLYMA_01G213800	GLYMA_13G225100	GLYMA_13G225100	GLYMA_16G169000		GLYMA_02G239000
GLYMA_02G209600	GLYMA_01G166300	GLYMA_01G158000	GLYMA_19G219500	GLYMA_14G140900	GLYMA_15G248300	GLYMA_09G029600	GLYMA_20G129200	GLYMA_08G189800	GLYMA_20G080800		GLYMA_02G209600
GLYMA_15G113200	GLYMA_14G150600	GLYMA_18G300900	GLYMA_20G027000	GLYMA_06G296700	GLYMA_04G052600	GLYMA_12G082800	GLYMA_08G314900	GLYMA_04G190600	GLYMA_02G034200		GLYMA_15G113200
GLYMA_03G134900	GLYMA_09G039500	GLYMA_09G020300	GLYMA_12G100100	GLYMA_02G293900	GLYMA_20G097100	GLYMA_10G035700	GLYMA_14G052100	GLYMA_02G302800	GLYMA_09G239100		GLYMA_03G134900
GLYMA_16G126400	GLYMA_07G091400	GLYMA_05G020600	GLYMA_15G018100	GLYMA_02G065900	GLYMA_18G265200	GLYMA_02G063900	GLYMA_12G179700	GLYMA_13G253100	GLYMA_08G038300		GLYMA_16G126400
ENSRNA050000638	GLYMA_14G011100	GLYMA_04G006400	GLYMA_08G256900	GLYMA_19G032100	GLYMA_06G169100	GLYMA_18G038000	GLYMA_12G004600	GLYMA_10G231900	GLYMA_13G186600		ENSRNA050000638
GLYMA_13G196200	GLYMA_20G164200	GLYMA_02G202500	GLYMA_03G078600	GLYMA_01G219100	GLYMA_20G142100	GLYMA_14G057200	GLYMA_19G192500	GLYMA_19G235700	GLYMA_15G094600		GLYMA_13G196200
GLYMA_13G368700	GLYMA_08G038200	GLYMA_09G029600	GLYMA_04G181500	GLYMA_07G070200	GLYMA_20G085900	GLYMA_02G003800	GLYMA_05G042400	GLYMA_14G011100	GLYMA_07G019800		GLYMA_13G368700
GLYMA_02G282900	GLYMA_15G113200	GLYMA_14G211500	GLYMA_11G196400	GLYMA_19G178100	GLYMA_11G076100	GLYMA_18G139900	GLYMA_02G208200	GLYMA_19G111700	GLYMA_07G076600		GLYMA_02G282900
GLYMA_03G192200	GLYMA_06G008100	GLYMA_19G023200	GLYMA_05G216400	GLYMA_18G038000	GLYMA_13G288500	GLYMA_13G299000	GLYMA_13G131400	GLYMA_18G274200	GLYMA_04G167200		GLYMA_03G192200
GLYMA_10G138800	GLYMA_08G229900	GLYMA_18G039900	GLYMA_11G244800	GLYMA_04G038800	GLYMA_15G150100	GLYMA_14G109200	GLYMA_14G067800	GLYMA_17G108700	GLYMA_13G057600		GLYMA_10G138800
GLYMA_13G361300	GLYMA_08G314900	GLYMA_05G075000	GLYMA_16G145000	GLYMA_02G107400	GLYMA_10G019000	GLYMA_05G003300	GLYMA_02G269000	GLYMA_12G207400	GLYMA_07G116700		GLYMA_13G361300
GLYMA_15G131500	GLYMA_08G144400	GLYMA_05G151400	GLYMA_14G037100	GLYMA_06G004500	GLYMA_03G221300	GLYMA_19G032100	GLYMA_04G223600	GLYMA_09G269500	GLYMA_06G088800		GLYMA_15G131500
GLYMA_06G202800	GLYMA_04G230400	GLYMA_18G289600	GLYMA_07G020900	GLYMA_06G049500	GLYMA_04G173200	GLYMA_06G067000	GLYMA_17G051100	GLYMA_13G099500	GLYMA_09G182400		GLYMA_06G202800
GLYMA_06G318200	GLYMA_20G064200	GLYMA_11G252600	GLYMA_05G189500	GLYMA_06G189900	GLYMA_16G175500	GLYMA_15G020800	GLYMA_13G165600	GLYMA_08G209800	GLYMA_08G247200		GLYMA_06G318200
GLYMA_11G160600	GLYMA_01G052300	GLYMA_14G115500	GLYMA_18G284400	GLYMA_01G192500	GLYMA_03G193300	GLYMA_09G039800	GLYMA_18G211800	GLYMA_14G096700	GLYMA_14G042000		GLYMA_11G160600
GLYMA_20G194900	GLYMA_03G104700	GLYMA_06G235000	GLYMA_13G335600	GLYMA_13G009700	GLYMA_02G007000	GLYMA_20G090800	GLYMA_19G076600	GLYMA_02G199300	GLYMA_03G237800		GLYMA_20G194900
GLYMA_19G128400	GLYMA_15G243000	GLYMA_20G049800	GLYMA_14G154200	GLYMA_18G199300	GLYMA_18G009800	GLYMA_03G021700	GLYMA_13G110800	GLYMA_12G064000	GLYMA_03G192200		GLYMA_19G128400
GLYMA_18G249100	GLYMA_05G161500	GLYMA_06G196600	GLYMA_09G038200	GLYMA_14G110500	GLYMA_10G288400	GLYMA_15G040100	GLYMA_12G044700	GLYMA_14G047500	GLYMA_14G004800		GLYMA_18G249100
GLYMA_18G103500	GLYMA_05G215500	GLYMA_01G205300	GLYMA_03G149300	GLYMA_19G235200	GLYMA_18G074100	GLYMA_10G231900	GLYMA_02G156800	GLYMA_13G350000	GLYMA_05G208700		GLYMA_18G103500
GLYMA_04G238600	GLYMA_05G118300	GLYMA_19G214500	GLYMA_10G067100	GLYMA_09G259500	GLYMA_19G150900	GLYMA_14G213100	GLYMA_07G206900	GLYMA_05G119300	GLYMA_13G281900		GLYMA_04G238600
GLYMA_09G032100	GLYMA_15G169300	GLYMA_12G006500	GLYMA_05G228400	GLYMA_16G156500	GLYMA_20G076300	GLYMA_17G096500	GLYMA_08G227700	GLYMA_19G014500	GLYMA_08G066800		GLYMA_09G032100
GLYMA_11G008300	GLYMA_11G244200	GLYMA_13G243800	GLYMA_13G187000	GLYMA_05G218300	GLYMA_07G208000	GLYMA_14G047200	GLYMA_10G155300	GLYMA_01G027500	GLYMA_07G260100		GLYMA_11G008300
GLYMA_08G210200	GLYMA_07G116700	GLYMA_01G007800	GLYMA_06G089300	GLYMA_02G100800	GLYMA_12G148200	GLYMA_19G111000	GLYMA_13G299000	GLYMA_17G098100	GLYMA_12G044600		GLYMA_08G210200
GLYMA_15G021200	GLYMA_05G192700	GLYMA_20G238300	GLYMA_14G085500	GLYMA_05G056600	GLYMA_10G129500	GLYMA_18G003800	GLYMA_16G146800	GLYMA_02G108600	GLYMA_18G205800		GLYMA_15G021200
GLYMA_17G050900	GLYMA_19G261000	GLYMA_09G083700	GLYMA_12G103800	GLYMA_19G076200	GLYMA_07G132100	GLYMA_02G097000	GLYMA_16G173100	GLYMA_11G255500	GLYMA_14G127800		GLYMA_17G050900
ENSRNA050000765	GLYMA_13G244000	ENSRNA050030686	GLYMA_03G017500	GLYMA_20G217100	GLYMA_13G187000	GLYMA_02G269000	GLYMA_14G109200	GLYMA_18G236700	GLYMA_06G206100		ENSRNA050000765
GLYMA_17G127200	GLYMA_14G215900	GLYMA_08G335700	GLYMA_17G115300	GLYMA_07G050700	GLYMA_14G085500	GLYMA_04G215600	GLYMA_14G085500	GLYMA_13G199300	GLYMA_06G114200		GLYMA_17G127200
GLYMA_10G243800	GLYMA_13G345400	GLYMA_02G235700	GLYMA_16G026100	GLYMA_17G042900	GLYMA_04G068300	GLYMA_17G038700	GLYMA_15G046900	GLYMA_01G079900	GLYMA_20G017100		GLYMA_10G243800
GLYMA_09G204100	GLYMA_11G253200	GLYMA_10G231900	GLYMA_01G192500	GLYMA_19G137500	GLYMA_07G210000	GLYMA_02G147100	GLYMA_20G057500	GLYMA_02G267800	GLYMA_13G307000		GLYMA_09G204100
GLYMA_16G210300	GLYMA_07G021000	GLYMA_01G099000	GLYMA_13G002000	GLYMA_01G113400	GLYMA_13G233400	GLYMA_18G064300	GLYMA_06G160200	GLYMA_06G324100	GLYMA_08G338200		GLYMA_16G210300
GLYMA_18G010500	GLYMA_06G061700	GLYMA_08G017300	GLYMA_05G050100	GLYMA_18G165000	GLYMA_20G234100	GLYMA_20G126700	GLYMA_19G159200	GLYMA_02G143300	GLYMA_13G063200		GLYMA_18G010500
GLYMA_20G201200	GLYMA_U029700	GLYMA_18G269700	GLYMA_01G195900	GLYMA_10G211000	GLYMA_16G150300	GLYMA_17G104000	GLYMA_17G164500	GLYMA_20G130400	GLYMA_15G237200		GLYMA_20G201200
GLYMA_16G152900	GLYMA_10G161900	GLYMA_12G105600	GLYMA_14G071600	GLYMA_05G190800	GLYMA_02G034500	GLYMA_10G189400	GLYMA_07G155200	GLYMA_18G103500	GLYMA_13G172100		GLYMA_16G152900
GLYMA_04G098800	GLYMA_18G261800	GLYMA_07G136500	GLYMA_10G015900	GLYMA_12G227700	GLYMA_14G150100	GLYMA_02G309200	GLYMA_08G174300	GLYMA_08G174300	GLYMA_08G127900		GLYMA_04G098800
GLYMA_04G080600	GLYMA_02G299200	GLYMA_11G113300	GLYMA_08G053600	GLYMA_02G266600	GLYMA_17G027300	GLYMA_10G011000	GLYMA_U001200	GLYMA_02G001000	GLYMA_15G256000		GLYMA_04G080600
GLYMA_16G216800	GLYMA_12G171100	GLYMA_06G308500	GLYMA_06G142200	GLYMA_04G013400	GLYMA_05G049300	GLYMA_08G189800	GLYMA_16G221500	GLYMA_04G055500	GLYMA_07G256900		GLYMA_16G216800
GLYMA_10G138200	GLYMA_09G236900	GLYMA_13G247600	GLYMA_05G241900	GLYMA_01G186700	GLYMA_01G035000	GLYMA_20G045800	GLYMA_06G236000	GLYMA_02G171100	GLYMA_10G000200		GLYMA_10G138200
ENSRNA050002907	GLYMA_06G082300	GLYMA_10G198500	GLYMA_13G049700	GLYMA_07G242700	GLYMA_20G196000	GLYMA_07G144700	GLYMA_07G229200	GLYMA_01G150000	GLYMA_03G217500		ENSRNA050002907
GLYMA_06G105200	GLYMA_08G329900	GLYMA_13G119000	GLYMA_04G145900	GLYMA_06G290500	GLYMA_18G012900	GLYMA_01G072800	GLYMA_19G020700	GLYMA_14G040100	GLYMA_07G229200		GLYMA_06G105200
GLYMA_13G202100	GLYMA_14G052100	GLYMA_13G038600	GLYMA_06G038900	GLYMA_12G240000	GLYMA_08G332900	GLYMA_06G097300	GLYMA_07G105000	GLYMA_06G284700	GLYMA_05G068400		GLYMA_13G202100
GLYMA_13G233400	GLYMA_05G090800	GLYMA_17G187200	GLYMA_02G026300	GLYMA_03G145800	GLYMA_15G114800	GLYMA_11G110900	GLYMA_20G126700	GLYMA_18G040800	GLYMA_06G308100		GLYMA_13G233400
GLYMA_19G137500	GLYMA_01G120400	GLYMA_15G267000	GLYMA_05G156400	GLYMA_17G033200	GLYMA_16G016700	GLYMA_20G057500	GLYMA_14G200800	GLYMA_09G010800	GLYMA_15G002200		GLYMA_19G137500
GLYMA_18G074100	GLYMA_17G099800	GLYMA_14G210600	GLYMA_12G023800	GLYMA_01G210500	GLYMA_20G137700	GLYMA_17G221400	GLYMA_19G147800	GLYMA_18G201100	GLYMA_03G218900		GLYMA_18G074100
GLYMA_U025400	GLYMA_06G030500	GLYMA_13G046800	GLYMA_16G053200	GLYMA_12G225700	GLYMA_08G075000	GLYMA_02G171100	GLYMA_03G114900	GLYMA_04G238300	GLYMA_01G112500		GLYMA_U025400
GLYMA_06G179900	GLYMA_14G018800	GLYMA_09G020100	GLYMA_10G195700	GLYMA_13G080500	GLYMA_16G018500	GLYMA_10G026100	GLYMA_02G093400	GLYMA_04G009600	GLYMA_13G208000		GLYMA_06G179900
GLYMA_10G295200	GLYMA_12G121000	GLYMA_10G029300	GLYMA_04G070500	GLYMA_07G218500	GLYMA_18G045300	GLYMA_08G213100	GLYMA_12G204600	GLYMA_04G223100	GLYMA_18G256900		GLYMA_10G295200
GLYMA_18G135000	GLYMA_04G004600	GLYMA_15G034300	GLYMA_02G152500	GLYMA_12G204600	GLYMA_03G137000	GLYMA_15G128300	GLYMA_11G158800	GLYMA_12G013200	GLYMA_18G019000		GLYMA_18G135000
GLYMA_03G237800	GLYMA_19G234100	GLYMA_04G165900	GLYMA_04G203100	GLYMA_06G063200	GLYMA_01G135500	GLYMA_13G243800	GLYMA_11G130400	GLYMA_17G048700	GLYMA_01G181700		GLYMA_03G237800
GLYMA_10G152000	GLYMA_12G011400	GLYMA_07G266700	GLYMA_17G027300	GLYMA_10G043800	GLYMA_12G191000	GLYMA_20G142900	GLYMA_04G104500	GLYMA_03G150100	GLYMA_08G312000		GLYMA_10G152000
GLYMA_17G205800	GLYMA_17G050900	GLYMA_13G059700	GLYMA_03G240700	GLYMA_19G200900	GLYMA_20G062500	GLYMA_08G245000	GLYMA_04G039600	GLYMA_19G205500	GLYMA_08G159900		GLYMA_17G205800
GLYMA_17G013400	GLYMA_08G243100	GLYMA_15G073400	GLYMA_02G118300	GLYMA_15G192100	GLYMA_19G249800	GLYMA_04G004600	GLYMA_12G211400	GLYMA_15G021200	GLYMA_11G233400		GLYMA_17G013400
GLYMA_03G193300	GLYMA_03G197300	GLYMA_06G194000	GLYMA_05G075100	GLYMA_16G139400	GLYMA_10G090000	GLYMA_19G022800	GLYMA_18G040800	GLYMA_18G023500	GLYMA_09G056300		GLYMA_03G193300
ENSRNA050001985	GLYMA_04G079400	GLYMA_04G209200	GLYMA_19G051100	GLYMA_07G155200	GLYMA_12G117100	GLYMA_07G254600	GLYMA_04G023000	GLYMA_17G218500	GLYMA_20G088900		ENSRNA050001985
GLYMA_12G075200	GLYMA_07G127200	GLYMA_17G218500	GLYMA_03G175100	GLYMA_15G150100	GLYMA_11G251100	GLYMA_01G106100	GLYMA_14G213100	GLYMA_11G087800	GLYMA_09G022500		GLYMA_12G075200
GLYMA_03G141800	GLYMA_05G096800	GLYMA_07G100600	GLYMA_18G127400	GLYMA_19G156400	GLYMA_13G298100	GLYMA_01G113400	GLYMA_01G099000	GLYMA_18G210900	GLYMA_08G019000		GLYMA_03G141800
GLYMA_11G044700	GLYMA_09G238800	GLYMA_18G141900	GLYMA_18G265200	GLYMA_07G133800	GLYMA_13G310700	GLYMA_02G051300	GLYMA_14G214300	GLYMA_07G115000	GLYMA_13G306600		GLYMA_11G044700
GLYMA_20G203000	GLYMA_13G059700	GLYMA_13G351600	GLYMA_07G016300	GLYMA_03G134100	GLYMA_07G261800	GLYMA_04G132700	GLYMA_18G271300	GLYMA_01G212300	GLYMA_11G136300		GLYMA_20G203000
GLYMA_13G293700	GLYMA_08G116600	GLYMA_15G133900	GLYMA_08G066800	GLYMA_15G234300	GLYMA_17G048700	GLYMA_13G345400	GLYMA_02G018900	GLYMA_01G147600	GLYMA_12G236600		GLYMA_13G293700
GLYMA_13G257200	GLYMA_10G286500	GLYMA_06G067000	GLYMA_18G062000	GLYMA_18G064300	GLYMA_04G178500	GLYMA_03G101000	GLYMA_12G063900	GLYMA_10G241600	GLYMA_04G040000		GLYMA_13G257200
GLYMA_20G212100	GLYMA_11G221000	GLYMA_01G006800	GLYMA_17G078700	GLYMA_08G011700	GLYMA_07G025800	GLYMA_03G116000	GLYMA_13G321200	GLYMA_08G226600	GLYMA_18G279700		GLYMA_20G212100
GLYMA_04G228900	GLYMA_12G037200	GLYMA_08G105600	GLYMA_01G081900	GLYMA_15G181600	GLYMA_08G281600	GLYMA_07G005100	GLYMA_05G129700	GLYMA_15G192100	GLYMA_03G193300		GLYMA_04G228900
GLYMA_06G090900	GLYMA_01G021200	GLYMA_07G165700	GLYMA_02G011500	GLYMA_04G184500	GLYMA_09G126500	GLYMA_07G101000	GLYMA_04G165900	GLYMA_10G124200	GLYMA_13G068800		GLYMA_06G090900
GLYMA_02G138200	GLYMA_16G165200	GLYMA_05G075100	GLYMA_01G191600	GLYMA_14G214300	GLYMA_16G046600	GLYMA_20G248200	GLYMA_12G052100	GLYMA_16G109300	GLYMA_01G106100		GLYMA_02G138200
GLYMA_06G206100	GLYMA_04G104500	GLYMA_20G033900	GLYMA_14G132500	GLYMA_12G195600	GLYMA_17G034900	GLYMA_08G038200	GLYMA_01G095500	GLYMA_05G034000	GLYMA_13G089800		GLYMA_06G206100
GLYMA_05G228100	GLYMA_14G181800	GLYMA_11G244900	GLYMA_17G223400	GLYMA_13G148700	GLYMA_13G151800	GLYMA_08G159900	GLYMA_07G087700	GLYMA_10G185100	GLYMA_07G153800		GLYMA_05G228100
GLYMA_14G003600	GLYMA_18G067600	GLYMA_04G045800	GLYMA_08G287400	GLYMA_17G035000	GLYMA_01G170000	GLYMA_05G094300	GLYMA_07G256900	GLYMA_11G083600	GLYMA_18G137500		GLYMA_14G003600
GLYMA_11G033900	GLYMA_16G021700	GLYMA_03G130300	GLYMA_10G230400	GLYMA_12G097800	GLYMA_16G178800	GLYMA_05G241900	GLYMA_08G252700	GLYMA_18G284900	GLYMA_08G284000		GLYMA_11G033900
GLYMA_11G178200	GLYMA_07G181400	GLYMA_04G091800	GLYMA_01G031300	GLYMA_19G174900	GLYMA_17G159000	GLYMA_10G241600	GLYMA_02G106300	GLYMA_02G051300	GLYMA_15G136700		GLYMA_11G178200
GLYMA_12G108500	GLYMA_15G119000	GLYMA_18G025300	GLYMA_14G127800	GLYMA_08G144500	GLYMA_05G214300	GLYMA_05G085400	GLYMA_13G099500	GLYMA_14G194300	GLYMA_05G070600		GLYMA_12G108500
GLYMA_02G259300	GLYMA_03G189100	GLYMA_12G117100	GLYMA_09G231700	GLYMA_17G212200	GLYMA_11G087800	GLYMA_18G206000	GLYMA_20G229000	GLYMA_18G273000	GLYMA_19G051000		GLYMA_02G259300
GLYMA_13G255800	GLYMA_10G208800	GLYMA_11G228000	GLYMA_18G031800	GLYMA_18G273000	GLYMA_17G008800	GLYMA_15G002300	GLYMA_03G206000	GLYMA_06G124400	GLYMA_16G175000		GLYMA_13G255800
GLYMA_02G022700	GLYMA_14G176400	GLYMA_09G043200	GLYMA_18G198100	GLYMA_08G017300	GLYMA_03G107900	GLYMA_10G103100	GLYMA_04G043600	GLYMA_01G011300	GLYMA_05G195000		GLYMA_02G022700
GLYMA_13G119000	GLYMA_02G202500	GLYMA_19G028600	GLYMA_09G029600	GLYMA_06G096600	GLYMA_02G013000	GLYMA_13G119000	GLYMA_05G056100	GLYMA_10G156500	GLYMA_10G017600		GLYMA_13G119000
GLYMA_08G234900	GLYMA_15G117000	GLYMA_17G205800	GLYMA_U009100	GLYMA_10G263500	GLYMA_14G214300	GLYMA_10G230400	GLYMA_10G221700	GLYMA_06G031900	GLYMA_18G254600		GLYMA_08G234900
GLYMA_13G108500	GLYMA_03G138400	GLYMA_20G015900	GLYMA_20G212100	GLYMA_09G188200	GLYMA_02G046800	GLYMA_08G176600	GLYMA_05G248800	GLYMA_19G020700	GLYMA_07G226400		GLYMA_13G108500
GLYMA_18G041300	GLYMA_13G108500	GLYMA_06G184900	GLYMA_20G090800	GLYMA_01G183100	GLYMA_12G224600	GLYMA_14G221500	GLYMA_13G369900	GLYMA_10G208800	GLYMA_01G159700		GLYMA_18G041300
GLYMA_19G055400	GLYMA_03G137000	GLYMA_10G221700	GLYMA_01G113100	GLYMA_16G190900	GLYMA_11G130900	GLYMA_06G215200	GLYMA_01G243200	GLYMA_08G201200	GLYMA_13G304100		GLYMA_19G055400
GLYMA_12G080700	GLYMA_14G038800	GLYMA_19G001400	GLYMA_19G073200	GLYMA_20G159200	GLYMA_10G138500	GLYMA_02G218200	GLYMA_19G137500	GLYMA_01G187400	GLYMA_02G157700		GLYMA_12G080700
GLYMA_16G017700	GLYMA_18G141500	GLYMA_06G077500	GLYMA_13G345400	GLYMA_18G111600	GLYMA_06G082300	GLYMA_11G192600	GLYMA_09G177300	GLYMA_14G205200	GLYMA_03G201700		GLYMA_16G017700
GLYMA_18G060400	GLYMA_03G226100	GLYMA_01G091400	GLYMA_16G038600	GLYMA_03G109300	GLYMA_09G015900	GLYMA_13G350000	GLYMA_09G191800	GLYMA_20G216700	GLYMA_01G230900		GLYMA_18G060400
GLYMA_03G197300	GLYMA_18G133500	GLYMA_10G011000	GLYMA_15G040100	GLYMA_02G269400	GLYMA_02G143200	GLYMA_06G163200	GLYMA_02G056600	GLYMA_08G314900	GLYMA_13G251100		GLYMA_03G197300
GLYMA_08G245000	GLYMA_10G154100	GLYMA_10G195700	GLYMA_09G247700	GLYMA_20G216700	GLYMA_15G050400	GLYMA_18G273000	GLYMA_07G237500	GLYMA_19G005800	GLYMA_18G103500		GLYMA_08G245000
GLYMA_09G272900	GLYMA_17G038900	GLYMA_08G043600	GLYMA_06G004900	GLYMA_19G159000	GLYMA_20G162000	GLYMA_08G287400	GLYMA_12G014600	GLYMA_05G056100	GLYMA_16G152600		GLYMA_09G272900
GLYMA_03G041000	GLYMA_19G260000	GLYMA_20G119200	GLYMA_08G364700	GLYMA_20G142900	GLYMA_16G061400	GLYMA_08G332900	GLYMA_09G239700	GLYMA_18G211800	GLYMA_15G149000		GLYMA_03G041000
GLYMA_11G084500	GLYMA_01G211000	GLYMA_06G284400	GLYMA_14G052000	GLYMA_06G285700	GLYMA_17G223400	GLYMA_06G022800	GLYMA_08G079100	GLYMA_07G027300	GLYMA_09G031600		GLYMA_11G084500
GLYMA_15G058800	GLYMA_18G041300	GLYMA_02G309200	GLYMA_09G039000	GLYMA_07G218900	GLYMA_05G123400	ENSRNA050000550	GLYMA_20G147700	GLYMA_04G207200	GLYMA_03G225500		GLYMA_15G058800
GLYMA_12G186200	GLYMA_15G224500	GLYMA_07G256900	GLYMA_09G273400	GLYMA_05G098700	GLYMA_10G060700	GLYMA_16G217000	GLYMA_12G011400	GLYMA_13G110200	GLYMA_13G032600		GLYMA_12G186200
GLYMA_11G247500	GLYMA_19G243500	GLYMA_02G286600	GLYMA_11G256100	GLYMA_18G025300	GLYMA_04G181500	GLYMA_18G165000	GLYMA_07G058800	GLYMA_15G267000	GLYMA_11G083600		GLYMA_11G247500
GLYMA_11G059900	GLYMA_04G098800	GLYMA_16G177600	GLYMA_06G027200	GLYMA_04G200500	GLYMA_13G059900	GLYMA_02G286600	GLYMA_08G022100	GLYMA_20G241800	GLYMA_06G113400		GLYMA_11G059900
GLYMA_09G191800	GLYMA_04G238300	GLYMA_03G143800	GLYMA_08G015300	GLYMA_13G204300	GLYMA_01G021200	GLYMA_15G087100	GLYMA_17G162800	GLYMA_17G099000	GLYMA_02G108700		GLYMA_09G191800
GLYMA_07G017000	GLYMA_17G255200	GLYMA_17G009900	GLYMA_06G013600	GLYMA_16G218700	GLYMA_11G029500	GLYMA_02G059500	GLYMA_13G245100	GLYMA_03G074600	GLYMA_11G215600		GLYMA_07G017000
GLYMA_10G067100	GLYMA_13G272500	GLYMA_12G179700	GLYMA_12G006500	GLYMA_17G038700	GLYMA_09G136400	GLYMA_16G155100	GLYMA_04G221700	GLYMA_11G256100	GLYMA_14G002800		GLYMA_10G067100
GLYMA_13G323700	GLYMA_12G076700	GLYMA_03G104700	GLYMA_12G233500	GLYMA_11G059900	GLYMA_06G033100	GLYMA_10G155300	GLYMA_17G093600	GLYMA_15G117000	GLYMA_20G107600		GLYMA_13G323700
GLYMA_10G263500	GLYMA_19G240300	GLYMA_02G212000	GLYMA_05G230300	GLYMA_18G175300	GLYMA_13G081400	GLYMA_15G270900	GLYMA_07G054100	GLYMA_16G010500	GLYMA_02G117700		GLYMA_10G263500
GLYMA_14G088300	GLYMA_20G215100	GLYMA_20G050500	GLYMA_18G153500	GLYMA_03G011400	GLYMA_19G020700	GLYMA_14G205200	GLYMA_02G138200	GLYMA_18G078000	GLYMA_15G181800		GLYMA_14G088300
GLYMA_04G136200	GLYMA_01G091900	GLYMA_01G187400	GLYMA_10G163500	GLYMA_02G051700	GLYMA_04G045800	GLYMA_06G119000	GLYMA_01G120400	GLYMA_02G018900	GLYMA_01G054100		GLYMA_04G136200
GLYMA_01G180400	GLYMA_08G035000	GLYMA_07G244400	GLYMA_02G212000	GLYMA_09G029400	GLYMA_13G131400	GLYMA_02G199300	GLYMA_17G047700	GLYMA_17G159000	GLYMA_08G200900		GLYMA_01G180400
GLYMA_13G059700	GLYMA_02G200500	GLYMA_U041200	GLYMA_11G166900	GLYMA_13G081000	GLYMA_14G040100	GLYMA_17G093600	GLYMA_08G205600	GLYMA_19G179800	GLYMA_09G168400		GLYMA_13G059700
GLYMA_18G009800	GLYMA_09G134200	GLYMA_15G077700	GLYMA_14G140900	GLYMA_18G139900	GLYMA_11G084100	GLYMA_14G053700	GLYMA_11G076100	GLYMA_04G190500	GLYMA_07G227200		GLYMA_18G009800
GLYMA_01G098700	GLYMA_15G069700	GLYMA_05G037800	GLYMA_11G076100	GLYMA_19G183800	GLYMA_15G055600	GLYMA_17G075300	GLYMA_18G045300	GLYMA_16G120200	GLYMA_18G060900		GLYMA_01G098700
GLYMA_19G042100	GLYMA_07G000500	GLYMA_15G154900	GLYMA_10G031200	GLYMA_05G007600	GLYMA_16G165600	GLYMA_16G056300	GLYMA_01G232400	GLYMA_08G284800	GLYMA_18G281700		GLYMA_19G042100
GLYMA_09G012400	GLYMA_18G014500	GLYMA_06G296700	GLYMA_14G207500	GLYMA_05G027500	GLYMA_14G220200	GLYMA_05G129700	GLYMA_10G039500	GLYMA_10G139400	GLYMA_13G094100		GLYMA_09G012400
GLYMA_18G091300	GLYMA_09G177300	GLYMA_06G271400	GLYMA_03G203500	GLYMA_08G210200	GLYMA_08G329900	GLYMA_09G060400	GLYMA_01G170000	GLYMA_07G133700	GLYMA_20G154900		GLYMA_18G091300
GLYMA_19G219500	GLYMA_20G231300	GLYMA_11G192600	GLYMA_04G190500	GLYMA_08G329900	GLYMA_13G210600	GLYMA_03G193300	GLYMA_03G064100	GLYMA_09G069900	GLYMA_13G266000		GLYMA_19G219500
GLYMA_17G030100	GLYMA_20G214200	GLYMA_19G192700	GLYMA_19G031100	GLYMA_02G309200	GLYMA_02G129300	GLYMA_10G198500	GLYMA_14G067000	GLYMA_02G311900	GLYMA_08G255200		GLYMA_17G030100
GLYMA_19G203500	GLYMA_04G149300	GLYMA_17G035000	GLYMA_08G146200	GLYMA_06G010500	GLYMA_07G032300	GLYMA_02G080800	GLYMA_20G203500	GLYMA_09G273800	GLYMA_04G030400		GLYMA_19G203500
GLYMA_03G206800	GLYMA_14G224000	GLYMA_01G206100	GLYMA_18G073600	GLYMA_09G022000	GLYMA_10G152000	GLYMA_15G068400	GLYMA_16G218700	GLYMA_06G134800	GLYMA_20G189600		GLYMA_03G206800
GLYMA_09G239100	GLYMA_04G097900	GLYMA_19G005200	GLYMA_04G238600	GLYMA_14G096700	GLYMA_14G200800	GLYMA_09G201900	GLYMA_19G224500	GLYMA_10G221700	GLYMA_17G121900		GLYMA_09G239100
GLYMA_02G135700	GLYMA_02G296300	GLYMA_07G207000	GLYMA_05G042400	GLYMA_06G235000	GLYMA_04G048600	GLYMA_04G209200	GLYMA_01G132600	GLYMA_10G058900	GLYMA_01G179400		GLYMA_02G135700
GLYMA_17G231900	GLYMA_02G097000	GLYMA_01G175300	GLYMA_20G229000	GLYMA_20G027000	GLYMA_17G055000	GLYMA_04G220700	GLYMA_03G209700	GLYMA_13G138600	GLYMA_17G139000		GLYMA_17G231900
GLYMA_03G201700	GLYMA_18G046200	GLYMA_02G080800	GLYMA_09G138300	GLYMA_16G108900	GLYMA_16G217700	GLYMA_06G035300	GLYMA_15G025400	GLYMA_06G322100	GLYMA_02G239000		GLYMA_03G201700
GLYMA_08G127900	GLYMA_19G022500	GLYMA_09G272900	GLYMA_01G230900	GLYMA_01G193500	GLYMA_12G044600	GLYMA_08G175300	GLYMA_12G070700	GLYMA_08G249900	GLYMA_05G002700		GLYMA_08G127900
GLYMA_17G060100	GLYMA_07G088300	GLYMA_17G002900	GLYMA_14G096700	GLYMA_17G093600	GLYMA_03G153600	GLYMA_06G206800	GLYMA_17G104000	GLYMA_12G006500	GLYMA_11G219600		GLYMA_17G060100
GLYMA_11G244200	GLYMA_15G063600	GLYMA_19G034900	GLYMA_14G049500	GLYMA_14G091500	GLYMA_02G269400	GLYMA_06G105200	GLYMA_05G150500	GLYMA_02G034700	GLYMA_12G197600		GLYMA_11G244200
GLYMA_02G202500	GLYMA_01G011500	GLYMA_15G252800	GLYMA_15G100900	GLYMA_12G100100	GLYMA_11G058200	GLYMA_06G196600	GLYMA_08G017700	GLYMA_08G287500	GLYMA_18G010500		GLYMA_02G202500
GLYMA_03G146100	GLYMA_11G220300	GLYMA_18G040800	GLYMA_14G052100	GLYMA_07G119800	GLYMA_02G189700	GLYMA_14G194300	GLYMA_02G269400	GLYMA_04G179600	GLYMA_05G008300		GLYMA_03G146100
GLYMA_01G230900	GLYMA_03G084300	GLYMA_13G222000	GLYMA_08G341100	GLYMA_04G033100	GLYMA_03G217300	GLYMA_11G174100	GLYMA_09G043200	GLYMA_19G028600	GLYMA_13G079900		GLYMA_01G230900
GLYMA_15G118500	GLYMA_12G090700	GLYMA_17G017200	GLYMA_06G199700	GLYMA_07G256900	GLYMA_17G152800	GLYMA_11G178200	GLYMA_03G157000	GLYMA_18G257900	GLYMA_02G053600		GLYMA_15G118500
GLYMA_10G046800	GLYMA_08G158800	GLYMA_14G047200	GLYMA_16G011900	GLYMA_17G089300	GLYMA_19G111300	GLYMA_02G007400	GLYMA_05G109600	GLYMA_18G036400	GLYMA_12G002000		GLYMA_10G046800
GLYMA_14G068300	GLYMA_15G063200	GLYMA_08G180900	GLYMA_03G130300	GLYMA_13G046600	GLYMA_17G110300	GLYMA_19G258000	GLYMA_18G152800	GLYMA_14G181500	GLYMA_14G037100		GLYMA_14G068300
GLYMA_19G144400	GLYMA_08G255200	GLYMA_16G206900	GLYMA_17G161200	GLYMA_11G068700	GLYMA_13G048100	GLYMA_20G152600	GLYMA_04G132700	GLYMA_20G204800	GLYMA_12G224600		GLYMA_19G144400
GLYMA_06G067000	GLYMA_01G003000	GLYMA_04G030400	GLYMA_17G050900	GLYMA_19G027400	GLYMA_17G253500	GLYMA_12G204600	GLYMA_06G179900	GLYMA_02G269000	GLYMA_11G193300		GLYMA_06G067000
GLYMA_15G158200	GLYMA_15G089000	GLYMA_07G054700	GLYMA_11G012400	GLYMA_13G228900	GLYMA_07G108200	GLYMA_01G187400	GLYMA_19G235300	GLYMA_19G112700	GLYMA_04G238600		GLYMA_15G158200
GLYMA_17G212200	GLYMA_18G101700	GLYMA_12G236600	GLYMA_18G125200	GLYMA_19G224500	GLYMA_07G181400	GLYMA_09G087300	GLYMA_06G318200	GLYMA_16G012700	GLYMA_17G038700		GLYMA_17G212200
GLYMA_13G350000	GLYMA_05G070600	GLYMA_18G064300	GLYMA_17G016600	GLYMA_02G046800	GLYMA_08G176100	GLYMA_01G098700	GLYMA_05G094300	GLYMA_03G246800	GLYMA_19G004400		GLYMA_13G350000
GLYMA_10G161900	GLYMA_15G188400	GLYMA_20G176100	GLYMA_10G288400	GLYMA_10G242300	GLYMA_10G017600	GLYMA_17G255200	GLYMA_03G184000	GLYMA_09G022000	GLYMA_10G014100		GLYMA_10G161900
GLYMA_04G150600	GLYMA_07G020900	GLYMA_20G163000	GLYMA_19G055400	GLYMA_17G127300	GLYMA_16G145200	GLYMA_13G088300	GLYMA_20G089900	GLYMA_02G148300	GLYMA_13G163900		GLYMA_04G150600
GLYMA_13G138600	GLYMA_20G130200	GLYMA_11G244200	GLYMA_05G179600	GLYMA_11G216000	GLYMA_15G063200	GLYMA_09G200800	GLYMA_17G008800	GLYMA_13G304100	GLYMA_07G020400		GLYMA_13G138600
GLYMA_11G057800	GLYMA_20G150600	GLYMA_20G193800	GLYMA_17G069200	GLYMA_16G133000	GLYMA_01G200500	GLYMA_19G017000	GLYMA_06G223300	GLYMA_06G307000	GLYMA_19G134700		GLYMA_11G057800
GLYMA_13G305400	GLYMA_02G152500	GLYMA_03G101000	GLYMA_15G032600	GLYMA_20G210900	GLYMA_02G267800	GLYMA_18G043800	GLYMA_15G229400	GLYMA_15G030100	GLYMA_01G190000		GLYMA_13G305400
GLYMA_06G114200	GLYMA_02G235700	GLYMA_06G069900	GLYMA_07G144700	GLYMA_18G257900	GLYMA_14G083600	GLYMA_13G108500	GLYMA_14G047200	GLYMA_02G308300	GLYMA_16G113000		GLYMA_06G114200
GLYMA_08G180500	GLYMA_10G251400	GLYMA_08G066800	GLYMA_13G233900	GLYMA_12G195900	GLYMA_17G132200	GLYMA_20G179700	GLYMA_06G171700	GLYMA_16G155100	GLYMA_01G130400		GLYMA_08G180500
GLYMA_13G303000	GLYMA_11G019000	GLYMA_03G152800	GLYMA_18G207900	GLYMA_09G046100	GLYMA_03G074600	GLYMA_05G098700	GLYMA_12G001300	GLYMA_20G085900	GLYMA_20G085700		GLYMA_13G303000
ENSRNA049760259	GLYMA_20G130400	GLYMA_05G070600	GLYMA_15G244900	GLYMA_10G029300	GLYMA_04G039600	GLYMA_18G150600	GLYMA_03G165300	GLYMA_10G172900	GLYMA_01G056100		ENSRNA049760259
GLYMA_20G035300	GLYMA_01G056000	GLYMA_05G177300	GLYMA_19G033900	GLYMA_12G056700	GLYMA_11G083800	GLYMA_07G116700	GLYMA_03G252200	GLYMA_03G068100	GLYMA_14G208000		GLYMA_20G035300
GLYMA_09G181200	GLYMA_16G139400	GLYMA_07G144700	GLYMA_03G246600	GLYMA_14G063300	GLYMA_18G150600	GLYMA_05G119300	GLYMA_02G100800	GLYMA_04G060800	GLYMA_01G193500		GLYMA_09G181200
GLYMA_02G284300	GLYMA_18G078300	GLYMA_18G165600	GLYMA_02G100800	GLYMA_11G067500	GLYMA_07G151600	GLYMA_06G290500	GLYMA_13G278400	GLYMA_18G042100	GLYMA_19G185500		GLYMA_02G284300
GLYMA_01G238100	GLYMA_04G238600	GLYMA_10G129500	GLYMA_06G109900	GLYMA_04G240600	GLYMA_08G297000	GLYMA_20G123000	GLYMA_11G153800	GLYMA_02G007000	GLYMA_09G018100		GLYMA_01G238100
GLYMA_09G216600	GLYMA_08G356800	GLYMA_09G039500	GLYMA_13G269500	GLYMA_14G115500	GLYMA_14G150600	GLYMA_02G137900	GLYMA_04G145100	GLYMA_03G129300	GLYMA_15G084600		GLYMA_09G216600
GLYMA_18G165000	GLYMA_04G215900	GLYMA_04G225400	GLYMA_04G177900	GLYMA_03G083700	GLYMA_02G068900	GLYMA_08G184200	GLYMA_13G205400	GLYMA_20G150300	GLYMA_02G309300		GLYMA_18G165000
GLYMA_03G104700	GLYMA_12G211400	GLYMA_10G138800	GLYMA_13G046900	GLYMA_16G052800	GLYMA_15G162600	GLYMA_08G073300	GLYMA_02G032700	GLYMA_02G007400	GLYMA_08G021900		GLYMA_03G104700
GLYMA_13G266000	GLYMA_08G312000	GLYMA_08G118100	GLYMA_06G105200	GLYMA_08G356800	GLYMA_18G211800	GLYMA_19G190000	GLYMA_05G236400	GLYMA_05G050200	GLYMA_12G234800		GLYMA_13G266000
GLYMA_17G215400	GLYMA_14G127800	GLYMA_15G104600	GLYMA_17G138300	GLYMA_19G023200	GLYMA_19G203500	GLYMA_04G039600	GLYMA_07G070200	GLYMA_05G245300	GLYMA_08G308000		GLYMA_17G215400
GLYMA_10G227700	GLYMA_20G236100	GLYMA_18G049500	GLYMA_04G206200	GLYMA_20G241700	GLYMA_02G228300	GLYMA_09G029400	GLYMA_12G063400	GLYMA_18G232800	GLYMA_06G255300		GLYMA_10G227700
GLYMA_19G195300	GLYMA_11G195000	GLYMA_04G043600	GLYMA_19G146900	GLYMA_09G010700	GLYMA_14G145700	GLYMA_04G030400	GLYMA_03G219200	GLYMA_11G067500	GLYMA_10G272000		GLYMA_19G195300
GLYMA_05G241900	GLYMA_05G148500	GLYMA_18G277500	GLYMA_09G239100	GLYMA_09G261600	GLYMA_06G091900	GLYMA_02G108600	GLYMA_09G010800	GLYMA_09G049100	GLYMA_20G150600		GLYMA_05G241900
GLYMA_08G163100	GLYMA_11G045000	GLYMA_05G154300	GLYMA_10G117200	GLYMA_10G258300	GLYMA_19G213900	GLYMA_11G221000	GLYMA_08G066800	GLYMA_17G048500	GLYMA_07G224100		GLYMA_08G163100
GLYMA_08G180900	GLYMA_15G276000	GLYMA_06G044500	GLYMA_02G200600	GLYMA_13G278400	GLYMA_19G167200	GLYMA_13G265500	GLYMA_12G187200	GLYMA_06G307600	GLYMA_15G154900		GLYMA_08G180900
GLYMA_02G112500	GLYMA_07G139600	GLYMA_11G195000	GLYMA_16G165600	GLYMA_19G115600	GLYMA_03G201100	GLYMA_03G104700	GLYMA_12G080700	GLYMA_16G038300	GLYMA_08G178000		GLYMA_02G112500
GLYMA_20G057500	GLYMA_03G188500	GLYMA_10G258300	GLYMA_18G238000	GLYMA_02G032700	GLYMA_13G281600	GLYMA_03G154000	GLYMA_02G046800	GLYMA_09G015900	GLYMA_15G181200		GLYMA_20G057500
GLYMA_04G003600	GLYMA_19G178000	GLYMA_05G140700	GLYMA_10G182800	GLYMA_09G181200	GLYMA_10G061300	GLYMA_04G065800	GLYMA_17G098100	GLYMA_20G142900	GLYMA_16G206400		GLYMA_04G003600
GLYMA_14G179200	GLYMA_03G146100	GLYMA_11G058200	GLYMA_02G147100	GLYMA_18G103200	GLYMA_10G045500	GLYMA_04G033100	GLYMA_01G187400	GLYMA_18G139900	GLYMA_15G079100		GLYMA_14G179200
GLYMA_14G122900	GLYMA_02G024100	GLYMA_01G243200	GLYMA_08G329900	GLYMA_09G020300	GLYMA_19G195300	GLYMA_09G234700	GLYMA_15G034300	GLYMA_19G111000	GLYMA_02G176100		GLYMA_14G122900
GLYMA_13G294800	GLYMA_12G044700	GLYMA_03G109300	GLYMA_14G220200	GLYMA_04G220700	GLYMA_13G211800	GLYMA_19G221000	GLYMA_13G328900	GLYMA_06G103700	GLYMA_05G150100		GLYMA_13G294800
GLYMA_18G213000	GLYMA_13G162600	GLYMA_06G049500	GLYMA_19G147400	GLYMA_13G304400	GLYMA_09G156700	GLYMA_02G208200	GLYMA_05G108600	GLYMA_12G197000	GLYMA_14G212400		GLYMA_18G213000
GLYMA_05G042400	GLYMA_01G034900	GLYMA_16G060400	GLYMA_02G299200	GLYMA_17G012300	GLYMA_19G133500	GLYMA_19G156000	GLYMA_17G218500	GLYMA_11G092900	GLYMA_03G149300		GLYMA_05G042400
GLYMA_16G178800	GLYMA_05G027500	GLYMA_15G224500	GLYMA_16G201000	GLYMA_10G050900	GLYMA_05G034000	GLYMA_20G069700	GLYMA_13G309900	GLYMA_11G219400	GLYMA_03G175100		GLYMA_16G178800
GLYMA_11G256100	GLYMA_20G203000	GLYMA_04G222000	GLYMA_14G155100	GLYMA_10G021700	GLYMA_04G022100	GLYMA_19G192500	GLYMA_11G208800	GLYMA_13G281900	GLYMA_07G009900		GLYMA_11G256100
GLYMA_02G108600	GLYMA_03G078300	GLYMA_01G180400	GLYMA_07G188300	GLYMA_01G170200	GLYMA_13G355600	GLYMA_16G017700	GLYMA_13G368700	GLYMA_15G242200	GLYMA_08G218600		GLYMA_02G108600
GLYMA_06G169700	GLYMA_02G302800	GLYMA_08G337100	GLYMA_08G161600	GLYMA_06G169700	GLYMA_11G111100	GLYMA_12G237600	GLYMA_09G070000	GLYMA_08G035000	GLYMA_17G031800		GLYMA_06G169700
GLYMA_09G138300	GLYMA_02G292800	GLYMA_01G113400	GLYMA_18G197800	GLYMA_17G138300	GLYMA_16G105100	GLYMA_11G127700	GLYMA_10G021700	GLYMA_15G003900	GLYMA_05G218400		GLYMA_09G138300
GLYMA_06G087300	GLYMA_18G121800	GLYMA_12G014600	GLYMA_11G252600	GLYMA_13G176000	GLYMA_10G073400	GLYMA_02G136900	GLYMA_08G147900	GLYMA_15G032600	GLYMA_05G151400		GLYMA_06G087300
GLYMA_20G179700	GLYMA_14G132500	GLYMA_14G213100	GLYMA_20G174600	GLYMA_18G193300	GLYMA_06G264700	GLYMA_06G080900	GLYMA_10G152300	GLYMA_03G137000	GLYMA_04G223600		GLYMA_20G179700
GLYMA_02G147500	GLYMA_13G262700	GLYMA_11G219400	GLYMA_12G044600	GLYMA_14G194900	GLYMA_08G098400	GLYMA_13G306600	GLYMA_07G115800	GLYMA_07G266700	GLYMA_18G090900		GLYMA_02G147500
GLYMA_11G209700	GLYMA_18G063200	GLYMA_16G153600	GLYMA_10G072500	GLYMA_19G205500	GLYMA_16G173700	GLYMA_03G130300	GLYMA_15G126600	GLYMA_08G024400	GLYMA_20G069700		GLYMA_11G209700
GLYMA_14G048400	GLYMA_19G023200	GLYMA_19G159000	GLYMA_14G069400	GLYMA_15G098700	GLYMA_08G253400	GLYMA_20G083800	GLYMA_01G081900	GLYMA_12G237600	GLYMA_15G075300		GLYMA_14G048400
GLYMA_15G090800	GLYMA_05G050400	GLYMA_17G016600	GLYMA_08G310600	GLYMA_12G096700	GLYMA_05G056100	GLYMA_06G006100	GLYMA_04G200500	GLYMA_02G208200	GLYMA_09G118800		GLYMA_15G090800
GLYMA_15G210500	GLYMA_07G050700	GLYMA_05G245400	GLYMA_02G110300	GLYMA_19G147800	GLYMA_08G226600	GLYMA_11G211100	GLYMA_07G100400	GLYMA_15G089100	GLYMA_13G147700		GLYMA_15G210500
GLYMA_10G196400	GLYMA_05G003300	GLYMA_05G056600	GLYMA_18G002600	GLYMA_08G042000	GLYMA_13G042500	GLYMA_18G074100	GLYMA_05G013700	GLYMA_07G207000	GLYMA_04G017200		GLYMA_10G196400
GLYMA_07G210000	GLYMA_09G008800	GLYMA_02G108800	GLYMA_05G050600	GLYMA_16G217000	GLYMA_07G207000	GLYMA_11G160600	GLYMA_06G242100	GLYMA_13G066100	GLYMA_15G101600		GLYMA_07G210000
GLYMA_13G278400	GLYMA_01G144900	GLYMA_17G033200	GLYMA_06G155000	GLYMA_14G213100	GLYMA_20G129200	GLYMA_13G362800	GLYMA_09G020300	GLYMA_09G168400	GLYMA_04G190400		GLYMA_13G278400
GLYMA_12G105600	GLYMA_17G044600	GLYMA_12G042900	GLYMA_20G062500	GLYMA_10G223700	GLYMA_02G236500	GLYMA_07G020400	GLYMA_03G104700	GLYMA_10G044700	GLYMA_U033600		GLYMA_12G105600
GLYMA_07G135100	GLYMA_06G117800	GLYMA_13G225100	GLYMA_11G244300	GLYMA_17G187200	GLYMA_01G147600	GLYMA_07G091400	GLYMA_18G048400	GLYMA_10G065600	GLYMA_13G138600		GLYMA_07G135100
GLYMA_17G236200	GLYMA_12G014400	GLYMA_19G235200	GLYMA_14G083600	GLYMA_20G089900	GLYMA_03G246800	GLYMA_02G235700	GLYMA_18G172800	GLYMA_18G037900	GLYMA_04G003600		GLYMA_17G236200
GLYMA_10G239700	GLYMA_20G007800	GLYMA_15G169300	GLYMA_16G122700	GLYMA_13G119000	GLYMA_04G215000	GLYMA_01G210400	GLYMA_06G056000	GLYMA_03G252800	GLYMA_13G321900		GLYMA_10G239700
GLYMA_01G150000	GLYMA_19G050000	GLYMA_19G179800	GLYMA_12G187000	GLYMA_01G135200	GLYMA_08G165700	GLYMA_13G099500	GLYMA_10G208800	GLYMA_14G040200	GLYMA_06G082300		GLYMA_01G150000
GLYMA_12G211400	GLYMA_08G148400	GLYMA_12G216300	GLYMA_10G136300	GLYMA_02G056600	GLYMA_10G015900	GLYMA_16G141500	GLYMA_17G187200	GLYMA_03G217800	GLYMA_06G297400		GLYMA_12G211400
GLYMA_15G114800	GLYMA_11G059200	GLYMA_11G008300	GLYMA_15G011200	GLYMA_08G107400	GLYMA_01G011300	GLYMA_19G150900	GLYMA_09G188200	GLYMA_18G074100	GLYMA_07G070200		GLYMA_15G114800
GLYMA_02G017100	GLYMA_01G183100	GLYMA_20G064200	GLYMA_03G104700	GLYMA_15G181200	GLYMA_09G044100	GLYMA_02G099600	GLYMA_02G223200	GLYMA_16G147400	GLYMA_08G138300		GLYMA_02G017100
GLYMA_18G271300	GLYMA_09G152500	GLYMA_07G020400	GLYMA_08G329600	GLYMA_13G098000	GLYMA_07G025600	GLYMA_09G020300	GLYMA_18G055800	GLYMA_03G225500	GLYMA_14G205200		GLYMA_18G271300
GLYMA_11G220300	GLYMA_18G222200	GLYMA_02G209600	GLYMA_10G209800	GLYMA_10G039500	GLYMA_06G031900	GLYMA_19G051100	GLYMA_13G122100	GLYMA_17G050900	GLYMA_06G033100		GLYMA_11G220300
GLYMA_05G234500	GLYMA_05G140700	GLYMA_07G115800	GLYMA_04G196100	GLYMA_07G207400	GLYMA_17G220900	GLYMA_15G154900	GLYMA_03G237600	GLYMA_10G051100	GLYMA_13G062500		GLYMA_05G234500
GLYMA_10G145800	GLYMA_05G011600	GLYMA_16G051300	GLYMA_02G108600	GLYMA_08G245000	GLYMA_18G059300	GLYMA_16G175500	GLYMA_15G021200	GLYMA_06G083600	GLYMA_13G208300		GLYMA_10G145800
GLYMA_04G225400	GLYMA_18G210900	GLYMA_13G080500	GLYMA_07G020400	GLYMA_12G197000	GLYMA_04G150500	GLYMA_13G148700	GLYMA_13G081000	GLYMA_15G011000	GLYMA_18G074100		GLYMA_04G225400
GLYMA_08G017300	GLYMA_10G031200	GLYMA_20G162600	GLYMA_01G195000	GLYMA_18G012200	GLYMA_09G194800	GLYMA_09G229200	GLYMA_10G249600	GLYMA_07G089900	GLYMA_05G187200		GLYMA_08G017300
GLYMA_13G110200	GLYMA_15G079500	GLYMA_06G160200	GLYMA_16G217000	GLYMA_06G083600	GLYMA_09G025500	GLYMA_07G200200	GLYMA_11G127700	GLYMA_06G125200	GLYMA_03G021700		GLYMA_13G110200
GLYMA_08G038200	GLYMA_04G084500	GLYMA_10G063100	GLYMA_08G146100	GLYMA_13G093600	GLYMA_12G081400	GLYMA_18G259600	GLYMA_15G146800	GLYMA_04G091800	GLYMA_03G005800		GLYMA_08G038200
GLYMA_07G089900	GLYMA_12G002000	GLYMA_02G148300	GLYMA_07G127200	GLYMA_18G045300	GLYMA_03G197300	GLYMA_03G205000	GLYMA_07G238400	GLYMA_06G096600	GLYMA_11G254700		GLYMA_07G089900
GLYMA_07G155500	GLYMA_11G179900	GLYMA_06G143400	GLYMA_07G110900	GLYMA_09G095800	GLYMA_08G043800	GLYMA_17G048700	GLYMA_17G211300	GLYMA_18G266200	GLYMA_18G254500		GLYMA_07G155500
GLYMA_06G144000	GLYMA_16G217700	GLYMA_07G242700	GLYMA_15G170400	GLYMA_08G074700	GLYMA_09G234900	GLYMA_17G187200	GLYMA_13G208400	GLYMA_08G329900	GLYMA_15G192100		GLYMA_06G144000
GLYMA_01G054100	GLYMA_03G117600	GLYMA_02G063900	GLYMA_08G255200	GLYMA_11G208800	GLYMA_02G233200	GLYMA_13G236100	GLYMA_06G169700	GLYMA_03G190400	GLYMA_02G138200		GLYMA_01G054100
GLYMA_16G097800	GLYMA_02G107400	GLYMA_03G184000	GLYMA_05G227600	GLYMA_03G237600	GLYMA_18G002600	GLYMA_17G078700	GLYMA_10G197800	GLYMA_09G047300	GLYMA_10G227700		GLYMA_16G097800
GLYMA_08G197700	GLYMA_06G005000	GLYMA_17G139000	GLYMA_06G218700	GLYMA_05G225800	GLYMA_14G146900	GLYMA_09G155700	GLYMA_09G222200	GLYMA_18G138000	GLYMA_14G087400		GLYMA_08G197700
GLYMA_02G074400	GLYMA_18G177500	GLYMA_09G140600	GLYMA_19G138900	GLYMA_07G100400	GLYMA_11G097300	GLYMA_08G209800	GLYMA_19G026000	GLYMA_03G149200	GLYMA_06G235500		GLYMA_02G074400
ENSRNA050003353	GLYMA_06G109900	GLYMA_12G164000	GLYMA_19G017000	GLYMA_02G208200	GLYMA_13G361700	GLYMA_03G190400	GLYMA_19G215600	GLYMA_15G121000	GLYMA_14G064000		ENSRNA050003353
GLYMA_17G100200	GLYMA_13G206500	GLYMA_10G027600	GLYMA_08G325200	GLYMA_04G006300	GLYMA_17G009900	GLYMA_20G193800	GLYMA_13G151800	GLYMA_10G193200	GLYMA_18G213000		GLYMA_17G100200
GLYMA_01G232400	GLYMA_02G110300	GLYMA_04G087500	GLYMA_18G190200	GLYMA_05G245900	GLYMA_09G039000	GLYMA_04G060800	GLYMA_15G020800	GLYMA_05G210900	GLYMA_03G018900		GLYMA_01G232400
GLYMA_03G050100	GLYMA_15G104600	GLYMA_10G170700	GLYMA_18G078000	GLYMA_19G253500	GLYMA_17G216100	GLYMA_13G089500	GLYMA_08G159900	GLYMA_04G004800	GLYMA_04G034400		GLYMA_03G050100
GLYMA_14G224000	GLYMA_01G186500	GLYMA_11G215600	GLYMA_07G266700	GLYMA_04G249600	GLYMA_06G134800	GLYMA_19G213900	GLYMA_03G028000	GLYMA_11G193300	GLYMA_10G295200		GLYMA_14G224000
GLYMA_12G179700	GLYMA_19G035800	GLYMA_09G043900	GLYMA_01G052300	GLYMA_17G158300	GLYMA_02G121400	GLYMA_14G009000	GLYMA_05G037800	GLYMA_20G179700	GLYMA_13G162900		GLYMA_12G179700
GLYMA_13G097100	GLYMA_18G148000	GLYMA_09G138100	GLYMA_03G252200	GLYMA_09G061300	GLYMA_13G303000	GLYMA_08G165700	GLYMA_14G194300	GLYMA_02G182400	GLYMA_12G021300		GLYMA_13G097100
GLYMA_11G083800	GLYMA_13G233400	GLYMA_07G147200	GLYMA_09G273800	GLYMA_01G081900	GLYMA_14G040200	GLYMA_10G196400	GLYMA_16G023500	GLYMA_04G115600	GLYMA_02G218200		GLYMA_11G083800
GLYMA_20G162600	GLYMA_09G010800	GLYMA_17G165300	GLYMA_02G237100	GLYMA_14G200800	GLYMA_01G168200	GLYMA_07G167000	GLYMA_06G215200	GLYMA_19G235200	GLYMA_14G034000		GLYMA_20G162600
GLYMA_18G254300	GLYMA_08G105700	GLYMA_13G131400	GLYMA_13G163900	GLYMA_07G005100	GLYMA_11G095700	GLYMA_12G004600	GLYMA_06G206800	GLYMA_17G187200	GLYMA_05G214300		GLYMA_18G254300
GLYMA_03G218900	GLYMA_13G251100	GLYMA_16G017700	GLYMA_18G210600	GLYMA_13G267000	GLYMA_02G264900	GLYMA_19G031800	GLYMA_17G138300	GLYMA_06G017600	GLYMA_08G119200		GLYMA_03G218900
GLYMA_13G005500	GLYMA_19G147400	GLYMA_15G089000	GLYMA_05G215500	GLYMA_20G062500	GLYMA_09G045900	GLYMA_12G072900	GLYMA_11G008300	GLYMA_12G184300	GLYMA_13G140000		GLYMA_13G005500
GLYMA_20G150300	GLYMA_18G282200	GLYMA_17G094500	GLYMA_11G247500	GLYMA_20G232000	GLYMA_18G036400	GLYMA_02G026300	GLYMA_15G243000	GLYMA_09G044100	GLYMA_14G040200		GLYMA_20G150300
GLYMA_14G177700	GLYMA_18G031800	GLYMA_05G027500	GLYMA_12G034200	GLYMA_05G151400	GLYMA_07G087100	GLYMA_05G150500	GLYMA_19G184900	GLYMA_18G258700	GLYMA_08G339000		GLYMA_14G177700
GLYMA_19G005800	GLYMA_13G048600	GLYMA_14G096700	GLYMA_01G003000	GLYMA_14G003700	GLYMA_13G206500	GLYMA_08G043600	GLYMA_11G083600	GLYMA_11G211100	GLYMA_01G027500		GLYMA_19G005800
GLYMA_08G363500	GLYMA_07G089900	GLYMA_08G213100	GLYMA_05G031200	GLYMA_07G206000	GLYMA_08G261100	GLYMA_01G191600	GLYMA_11G192600	GLYMA_05G003900	GLYMA_11G192600		GLYMA_08G363500
GLYMA_U033600	GLYMA_13G227700	GLYMA_15G170500	GLYMA_10G090000	GLYMA_13G110800	GLYMA_13G149100	GLYMA_08G083300	GLYMA_16G056300	GLYMA_20G069700	GLYMA_08G324300		GLYMA_U033600
GLYMA_10G029300	GLYMA_03G129600	GLYMA_13G228900	GLYMA_03G028000	GLYMA_13G369900	GLYMA_03G252500	GLYMA_19G178100	GLYMA_15G069900	GLYMA_01G211000	GLYMA_09G049500		GLYMA_10G029300
GLYMA_19G156000	GLYMA_06G140100	GLYMA_17G100200	GLYMA_09G236900	GLYMA_18G076200	GLYMA_04G252600	GLYMA_13G361300	GLYMA_03G116000	GLYMA_11G160600	GLYMA_18G219600		GLYMA_19G156000
GLYMA_05G082700	GLYMA_18G257900	GLYMA_04G223600	GLYMA_02G143200	GLYMA_01G187400	GLYMA_15G276000	GLYMA_04G038800	GLYMA_04G191100	GLYMA_13G089200	GLYMA_15G146800		GLYMA_05G082700
GLYMA_05G161500	GLYMA_15G055600	GLYMA_12G072900	GLYMA_15G019300	GLYMA_04G182300	GLYMA_18G029400	GLYMA_08G132700	GLYMA_17G155600	GLYMA_08G332900	GLYMA_03G057100		GLYMA_05G161500
GLYMA_05G215900	GLYMA_11G140500	GLYMA_12G219700	GLYMA_10G250200	GLYMA_19G244100	GLYMA_05G208500	GLYMA_09G043200	GLYMA_01G035000	GLYMA_17G089300	GLYMA_20G085900		GLYMA_05G215900
GLYMA_20G033900	GLYMA_10G072000	GLYMA_17G239200	GLYMA_03G134100	GLYMA_01G170000	GLYMA_03G144800	GLYMA_11G008300	GLYMA_07G172600	GLYMA_13G228900	GLYMA_08G198500		GLYMA_20G033900
GLYMA_15G063200	GLYMA_04G129700	GLYMA_13G005500	GLYMA_10G189700	GLYMA_10G052200	GLYMA_03G246600	GLYMA_05G037800	GLYMA_02G074500	GLYMA_09G010600	GLYMA_13G066600		GLYMA_15G063200
GLYMA_18G211800	GLYMA_04G223100	GLYMA_07G206900	GLYMA_05G063700	GLYMA_12G164000	GLYMA_08G249900	GLYMA_13G233400	GLYMA_14G052000	GLYMA_08G033000	GLYMA_20G201200		GLYMA_18G211800
GLYMA_10G145900	GLYMA_11G068700	GLYMA_02G074500	GLYMA_04G145100	GLYMA_06G149500	GLYMA_07G052300	GLYMA_17G017200	GLYMA_19G205500	GLYMA_13G176300	GLYMA_08G308300		GLYMA_10G145900
GLYMA_07G183900	GLYMA_08G261100	GLYMA_10G196400	GLYMA_05G119000	GLYMA_10G158300	GLYMA_06G290300	GLYMA_01G036000	GLYMA_10G259800	GLYMA_10G243800	GLYMA_15G055800		GLYMA_07G183900
GLYMA_02G145100	GLYMA_01G217400	GLYMA_19G045700	GLYMA_01G233800	GLYMA_04G222000	GLYMA_06G190100	GLYMA_11G094800	GLYMA_01G170200	GLYMA_10G200800	GLYMA_11G256100		GLYMA_02G145100
GLYMA_07G022400	GLYMA_08G324300	GLYMA_09G234900	GLYMA_20G137700	GLYMA_10G252500	GLYMA_15G079100	GLYMA_18G228100	GLYMA_14G205200	GLYMA_18G004300	GLYMA_18G189600		GLYMA_07G022400
GLYMA_13G095200	GLYMA_02G072400	GLYMA_13G147700	GLYMA_15G146400	GLYMA_02G136900	GLYMA_12G012000	GLYMA_17G047700	GLYMA_03G134900	GLYMA_03G109300	GLYMA_08G306600		GLYMA_13G095200
GLYMA_20G154400	GLYMA_11G253900	GLYMA_17G034900	GLYMA_07G038500	GLYMA_10G028500	GLYMA_14G047500	GLYMA_18G289600	GLYMA_16G076100	GLYMA_08G306600	GLYMA_06G271400		GLYMA_20G154400
GLYMA_05G144100	GLYMA_11G203800	GLYMA_14G214300	GLYMA_13G224900	GLYMA_20G069700	GLYMA_03G179100	GLYMA_06G148500	GLYMA_20G204800	ENSRNA050030687	GLYMA_19G190000		GLYMA_05G144100
GLYMA_14G205200	GLYMA_13G098000	GLYMA_14G009000	GLYMA_08G035000	GLYMA_11G159800	GLYMA_14G220600	GLYMA_07G181400	GLYMA_13G265500	GLYMA_14G072500	GLYMA_14G053100		GLYMA_14G205200
GLYMA_03G217500	GLYMA_17G106800	GLYMA_14G047500	GLYMA_14G194900	GLYMA_06G174600	GLYMA_17G111100	GLYMA_04G091800	GLYMA_16G121900	GLYMA_10G197800	GLYMA_13G247600		GLYMA_03G217500
GLYMA_16G133400	GLYMA_09G265800	GLYMA_17G044600	GLYMA_14G015700	GLYMA_17G218500	GLYMA_13G276600	GLYMA_15G024600	GLYMA_11G110900	GLYMA_11G254700	GLYMA_14G029700		GLYMA_16G133400
GLYMA_07G227300	GLYMA_10G189100	GLYMA_U001200	GLYMA_20G179700	GLYMA_17G218900	GLYMA_02G042600	GLYMA_03G017500	GLYMA_03G177300	GLYMA_02G218200	GLYMA_10G258300		GLYMA_07G227300
GLYMA_07G015400	GLYMA_07G146400	GLYMA_12G225700	GLYMA_06G050500	GLYMA_02G241800	GLYMA_10G221700	GLYMA_08G066800	GLYMA_10G018800	GLYMA_18G003200	GLYMA_13G262200		GLYMA_07G015400
GLYMA_13G244000	GLYMA_13G292800	GLYMA_14G179200	GLYMA_15G187800	GLYMA_09G134200	GLYMA_04G074500	GLYMA_16G170300	GLYMA_05G144100	GLYMA_13G080500	GLYMA_17G037500		GLYMA_13G244000
GLYMA_15G003900	GLYMA_05G098700	GLYMA_03G029800	GLYMA_08G043800	GLYMA_02G214300	GLYMA_10G029300	GLYMA_18G046100	GLYMA_01G106100	GLYMA_03G057100	GLYMA_18G003200		GLYMA_15G003900
GLYMA_20G017800	GLYMA_17G241400	GLYMA_12G080700	GLYMA_06G289900	GLYMA_11G048700	GLYMA_07G005100	GLYMA_07G020900	GLYMA_07G201000	GLYMA_13G276600	GLYMA_12G206000		GLYMA_20G017800
GLYMA_02G212000	GLYMA_03G217300	GLYMA_02G283500	GLYMA_13G285800	GLYMA_08G170500	GLYMA_08G062500	GLYMA_13G079900	GLYMA_03G227600	GLYMA_07G025600	GLYMA_11G246600		GLYMA_02G212000
GLYMA_10G156500	GLYMA_08G180500	GLYMA_16G126400	GLYMA_11G095700	GLYMA_02G106300	GLYMA_18G271400	GLYMA_14G150600	GLYMA_15G089100	GLYMA_18G165000	GLYMA_19G133500		GLYMA_10G156500
GLYMA_13G333100	GLYMA_08G083700	GLYMA_09G234700	GLYMA_18G150600	GLYMA_17G165300	GLYMA_03G063900	GLYMA_03G219200	GLYMA_03G152500	GLYMA_03G196400	GLYMA_11G037100		GLYMA_13G333100
GLYMA_11G083600	GLYMA_05G197100	GLYMA_08G314900	GLYMA_03G137000	GLYMA_07G049100	GLYMA_01G027500	GLYMA_16G021700	GLYMA_11G254700	GLYMA_05G188700	GLYMA_07G155200		GLYMA_11G083600
GLYMA_18G048000	GLYMA_20G132200	GLYMA_05G214900	GLYMA_20G114900	GLYMA_19G145200	GLYMA_18G205500	GLYMA_08G180900	GLYMA_02G060900	GLYMA_11G022300	GLYMA_17G098100		GLYMA_18G048000
GLYMA_05G014900	GLYMA_14G069400	GLYMA_03G150100	GLYMA_19G213900	GLYMA_13G281600	GLYMA_15G005000	GLYMA_20G129200	GLYMA_15G252800	GLYMA_13G204300	GLYMA_12G032900		GLYMA_05G014900
GLYMA_05G196200	GLYMA_06G157300	GLYMA_11G048700	GLYMA_07G260100	GLYMA_18G043900	GLYMA_13G227900	GLYMA_10G072000	GLYMA_12G225700	GLYMA_17G034900	GLYMA_14G150600		GLYMA_05G196200
GLYMA_14G011100	GLYMA_U038700	GLYMA_07G210000	GLYMA_01G218500	GLYMA_05G180200	GLYMA_11G071100	GLYMA_13G046800	GLYMA_02G074400	GLYMA_13G278400	GLYMA_19G260300		GLYMA_14G011100
GLYMA_10G061300	GLYMA_08G079100	GLYMA_05G190800	GLYMA_11G155100	GLYMA_15G264100	GLYMA_15G117000	GLYMA_01G103500	GLYMA_13G356000	GLYMA_05G068400	GLYMA_08G332900		GLYMA_10G061300
GLYMA_09G273800	GLYMA_17G161300	GLYMA_08G159900	GLYMA_19G156700	GLYMA_20G103600	GLYMA_14G088300	GLYMA_16G051300	GLYMA_05G008300	GLYMA_13G305100	GLYMA_18G248900		GLYMA_09G273800
GLYMA_15G122200	GLYMA_09G022300	GLYMA_14G091500	GLYMA_15G068400	GLYMA_03G227600	GLYMA_13G227700	GLYMA_06G030500	GLYMA_17G065300	GLYMA_18G238000	GLYMA_09G047300		GLYMA_15G122200
GLYMA_11G110900	GLYMA_18G001300	GLYMA_13G037900	GLYMA_08G176100	GLYMA_20G017800	GLYMA_18G038000	GLYMA_09G278200	GLYMA_05G241900	GLYMA_18G064300	GLYMA_03G101000		GLYMA_11G110900
GLYMA_20G247800	GLYMA_15G149000	GLYMA_16G102400	GLYMA_10G061600	GLYMA_09G070000	GLYMA_18G142600	GLYMA_13G244000	GLYMA_05G098700	GLYMA_14G133100	GLYMA_03G198600		GLYMA_20G247800
GLYMA_19G179800	GLYMA_13G233700	GLYMA_07G209300	GLYMA_02G228300	GLYMA_13G025800	GLYMA_15G274600	GLYMA_04G216100	GLYMA_10G076100	GLYMA_09G083700	GLYMA_02G199300		GLYMA_19G179800
GLYMA_19G150900	GLYMA_10G021700	GLYMA_02G171100	GLYMA_09G094000	GLYMA_07G032300	GLYMA_07G227300	GLYMA_04G091300	GLYMA_20G050500	GLYMA_08G079200	GLYMA_20G030600		GLYMA_19G150900
GLYMA_13G300400	GLYMA_08G227200	GLYMA_11G076100	GLYMA_11G247700	GLYMA_08G105600	GLYMA_10G139300	GLYMA_11G244800	GLYMA_06G194000	GLYMA_05G246500	GLYMA_19G210700		GLYMA_13G300400
GLYMA_05G090800	GLYMA_10G189700	GLYMA_20G203000	GLYMA_02G072400	GLYMA_13G208400	GLYMA_15G114700	GLYMA_07G215600	GLYMA_17G253800	GLYMA_02G214300	GLYMA_11G091400		GLYMA_05G090800
GLYMA_18G281000	GLYMA_07G271200	GLYMA_04G132700	GLYMA_03G237800	GLYMA_07G154600	GLYMA_18G210900	GLYMA_10G076100	GLYMA_07G116700	GLYMA_19G071600	GLYMA_08G165700		GLYMA_18G281000
GLYMA_10G212100	GLYMA_04G045800	GLYMA_06G117800	GLYMA_08G008800	GLYMA_10G195700	GLYMA_13G272500	GLYMA_12G064000	GLYMA_11G032200	GLYMA_11G048400	GLYMA_07G144700		GLYMA_10G212100
GLYMA_02G007300	GLYMA_18G300800	GLYMA_18G288800	GLYMA_05G160100	GLYMA_09G040800	GLYMA_04G065800	GLYMA_20G229000	GLYMA_01G054100	GLYMA_09G199100	GLYMA_20G142100		GLYMA_02G007300
GLYMA_02G181600	GLYMA_10G045500	GLYMA_19G216100	GLYMA_05G234200	GLYMA_15G057700	GLYMA_15G061800	GLYMA_02G209600	GLYMA_02G302800	GLYMA_09G020300	GLYMA_13G304400		GLYMA_02G181600
GLYMA_18G288800	GLYMA_04G005100	GLYMA_01G004200	GLYMA_03G144800	GLYMA_08G032900	GLYMA_10G058900	GLYMA_06G270400	GLYMA_03G021700	GLYMA_05G233300	GLYMA_17G011400		GLYMA_18G288800
GLYMA_14G170700	GLYMA_16G098300	GLYMA_17G058400	GLYMA_02G308300	GLYMA_01G178300	GLYMA_11G256100	GLYMA_07G172600	GLYMA_17G099000	GLYMA_15G131000	GLYMA_05G042800		GLYMA_14G170700
GLYMA_04G052000	GLYMA_11G157000	GLYMA_08G239400	GLYMA_16G065300	GLYMA_16G034300	GLYMA_02G056600	GLYMA_16G177600	GLYMA_03G141900	GLYMA_16G122700	GLYMA_03G012900		GLYMA_04G052000
GLYMA_07G235900	GLYMA_15G025400	GLYMA_14G053100	GLYMA_05G177300	GLYMA_12G171100	GLYMA_20G201200	GLYMA_04G028600	GLYMA_07G014600	GLYMA_18G045300	GLYMA_08G234900		GLYMA_07G235900
GLYMA_15G169300	GLYMA_19G195300	GLYMA_07G020900	GLYMA_17G012300	GLYMA_14G194300	GLYMA_02G204700	GLYMA_10G138800	GLYMA_13G303700	GLYMA_08G159900	GLYMA_12G120200		GLYMA_15G169300
GLYMA_19G221000	GLYMA_18G187400	GLYMA_18G060400	GLYMA_03G056700	GLYMA_17G113000	GLYMA_19G051100	GLYMA_13G215400	GLYMA_10G291700	GLYMA_03G219200	GLYMA_17G138800		GLYMA_19G221000
GLYMA_08G220800	GLYMA_10G138500	GLYMA_04G190300	GLYMA_10G221700	GLYMA_10G136700	GLYMA_17G175400	GLYMA_12G070700	GLYMA_13G147700	GLYMA_12G204600	GLYMA_20G115900		GLYMA_08G220800
GLYMA_04G079400	GLYMA_15G264100	GLYMA_10G274800	GLYMA_14G150600	GLYMA_08G109400	GLYMA_13G245100	GLYMA_01G095500	GLYMA_17G048500	GLYMA_01G151300	GLYMA_13G046800		GLYMA_04G079400
GLYMA_11G158800	GLYMA_04G068300	GLYMA_18G009300	GLYMA_09G028100	GLYMA_01G030900	GLYMA_18G057800	GLYMA_02G265700	GLYMA_03G040500	GLYMA_03G222300	GLYMA_02G051300		GLYMA_11G158800
GLYMA_06G135700	GLYMA_04G190500	GLYMA_02G110300	GLYMA_02G134100	GLYMA_09G020100	GLYMA_18G281400	GLYMA_20G027000	GLYMA_06G080900	GLYMA_02G116400	GLYMA_16G206300		GLYMA_06G135700
GLYMA_13G356000	GLYMA_06G143700	GLYMA_17G075300	GLYMA_19G042000	GLYMA_04G091400	GLYMA_14G090000	GLYMA_20G100500	GLYMA_10G195700	GLYMA_07G238400	GLYMA_13G293700		GLYMA_13G356000
GLYMA_04G191100	GLYMA_08G308300	GLYMA_04G038800	GLYMA_01G107300	GLYMA_03G145500	GLYMA_08G153700	GLYMA_02G233200	GLYMA_05G147700	GLYMA_12G202700	GLYMA_09G188200		GLYMA_04G191100
GLYMA_11G241900	GLYMA_13G148700	GLYMA_05G241900	GLYMA_09G256100	GLYMA_18G060400	GLYMA_04G104200	GLYMA_02G267800	GLYMA_05G034000	GLYMA_13G281600	GLYMA_12G064000		GLYMA_11G241900
GLYMA_08G342000	GLYMA_03G200400	GLYMA_05G225300	GLYMA_06G187000	GLYMA_13G099500	GLYMA_09G004400	GLYMA_07G141600	GLYMA_12G096700	GLYMA_08G233200	GLYMA_17G166900		GLYMA_08G342000
GLYMA_03G006200	GLYMA_13G114200	GLYMA_13G345400	GLYMA_04G005100	GLYMA_04G102400	GLYMA_17G113000	GLYMA_18G078000	GLYMA_06G174600	GLYMA_14G156800	GLYMA_17G122400		GLYMA_03G006200
GLYMA_19G250400	GLYMA_04G040600	GLYMA_04G205300	GLYMA_14G067500	GLYMA_01G058400	GLYMA_13G094500	GLYMA_10G039500	GLYMA_14G194900	GLYMA_02G227200	GLYMA_19G222500		GLYMA_19G250400
GLYMA_07G260100	GLYMA_11G247400	GLYMA_13G138600	GLYMA_13G350300	GLYMA_13G040400	GLYMA_14G049500	GLYMA_12G100100	GLYMA_07G226800	GLYMA_07G209300	GLYMA_20G126700		GLYMA_07G260100
GLYMA_15G025400	GLYMA_02G272100	GLYMA_01G224400	GLYMA_02G202500	GLYMA_18G009300	GLYMA_08G308600	GLYMA_18G044900	GLYMA_08G131000	GLYMA_03G071700	GLYMA_05G166900		GLYMA_15G025400
GLYMA_14G091500	GLYMA_07G155200	GLYMA_11G221000	GLYMA_04G031100	GLYMA_03G104700	GLYMA_09G001700	GLYMA_03G177300	GLYMA_11G244200	GLYMA_12G219700	GLYMA_05G175500		GLYMA_14G091500
GLYMA_02G157700	GLYMA_07G110900	GLYMA_11G220300	GLYMA_10G173100	GLYMA_13G189800	GLYMA_02G285200	GLYMA_06G299700	GLYMA_19G035400	GLYMA_10G060700	GLYMA_14G176300		GLYMA_02G157700
GLYMA_04G065800	GLYMA_03G088900	GLYMA_13G255800	GLYMA_07G227700	GLYMA_10G152300	GLYMA_13G138600	GLYMA_13G147700	GLYMA_18G038200	GLYMA_02G269400	GLYMA_15G144700		GLYMA_04G065800
GLYMA_12G046800	GLYMA_19G194100	GLYMA_12G052100	GLYMA_16G120200	GLYMA_18G284400	GLYMA_02G043200	GLYMA_10G133500	GLYMA_18G064300	GLYMA_17G108300	GLYMA_16G175400		GLYMA_12G046800
GLYMA_12G206000	GLYMA_13G293700	GLYMA_13G255000	GLYMA_07G071200	GLYMA_10G133900	GLYMA_13G152100	GLYMA_19G207000	GLYMA_05G085400	GLYMA_10G076100	GLYMA_18G286700		GLYMA_12G206000
GLYMA_20G115900	GLYMA_19G135400	GLYMA_09G022000	GLYMA_02G069700	GLYMA_13G191900	GLYMA_19G215800	GLYMA_17G042800	GLYMA_20G193800	GLYMA_09G194800	GLYMA_11G059900		GLYMA_20G115900
GLYMA_04G115600	GLYMA_04G179600	GLYMA_13G110800	GLYMA_14G216600	GLYMA_07G209300	GLYMA_12G184300	GLYMA_04G009600	GLYMA_07G167000	GLYMA_08G165700	GLYMA_16G062600		GLYMA_04G115600
GLYMA_02G116400	GLYMA_16G105400	GLYMA_18G018600	GLYMA_05G085400	GLYMA_14G051800	GLYMA_10G241600	GLYMA_17G076000	GLYMA_19G235200	GLYMA_15G034600	GLYMA_12G001300		GLYMA_02G116400
GLYMA_17G159000	GLYMA_13G264400	GLYMA_04G187600	GLYMA_11G111100	GLYMA_05G042800	GLYMA_08G303100	GLYMA_12G063900	GLYMA_08G289300	GLYMA_14G068300	GLYMA_01G038600		GLYMA_17G159000
GLYMA_09G083700	GLYMA_13G131400	GLYMA_01G232400	GLYMA_20G035200	GLYMA_08G227700	GLYMA_19G244100	GLYMA_06G044500	GLYMA_08G355900	GLYMA_17G094500	GLYMA_08G226600		GLYMA_09G083700
GLYMA_07G208000	GLYMA_08G328300	GLYMA_15G128300	GLYMA_13G070900	GLYMA_06G134800	GLYMA_02G182400	GLYMA_10G118100	GLYMA_01G009700	GLYMA_19G172900	GLYMA_01G175300		GLYMA_07G208000
GLYMA_08G072700	GLYMA_15G084800	GLYMA_20G232000	GLYMA_08G220600	GLYMA_12G030900	GLYMA_20G107600	GLYMA_09G238800	GLYMA_01G181700	GLYMA_07G015400	GLYMA_06G060600		GLYMA_08G072700
GLYMA_09G045900	GLYMA_11G055200	GLYMA_11G071100	GLYMA_05G011300	GLYMA_03G205000	GLYMA_06G064900	GLYMA_02G302800	GLYMA_04G004800	GLYMA_14G201200	GLYMA_01G150000		GLYMA_09G045900
GLYMA_16G012700	GLYMA_03G056700	GLYMA_19G017000	GLYMA_06G169100	GLYMA_14G057200	GLYMA_09G130000	GLYMA_17G034900	GLYMA_20G123000	GLYMA_03G138900	GLYMA_16G126400		GLYMA_16G012700
GLYMA_08G249900	GLYMA_12G044600	GLYMA_05G234200	GLYMA_20G025800	GLYMA_09G173700	GLYMA_17G180400	GLYMA_13G293700	GLYMA_04G004100	GLYMA_03G175100	GLYMA_18G148100		GLYMA_08G249900
GLYMA_05G169600	GLYMA_08G281600	GLYMA_08G038300	GLYMA_08G210200	GLYMA_15G121000	GLYMA_02G269000	GLYMA_12G053800	GLYMA_17G248300	GLYMA_03G148100	GLYMA_05G197100		GLYMA_05G169600
GLYMA_19G195800	GLYMA_20G201200	GLYMA_16G056300	GLYMA_16G077900	GLYMA_17G100200	GLYMA_11G033900	GLYMA_15G181600	GLYMA_04G030400	GLYMA_09G153900	GLYMA_04G040200		GLYMA_19G195800
GLYMA_16G077900	GLYMA_01G024800	GLYMA_08G035000	GLYMA_13G081400	GLYMA_04G062000	GLYMA_02G227200	GLYMA_13G215000	GLYMA_14G027800	GLYMA_03G030400	GLYMA_08G330100		GLYMA_16G077900
GLYMA_14G132500	GLYMA_16G103500	GLYMA_12G064000	GLYMA_13G262700	GLYMA_06G006100	GLYMA_12G182600	GLYMA_16G047600	GLYMA_12G108600	GLYMA_19G260000	GLYMA_18G238000		GLYMA_14G132500
GLYMA_18G004300	GLYMA_14G210000	GLYMA_15G040100	GLYMA_17G113100	GLYMA_18G278100	GLYMA_14G029700	GLYMA_20G203000	GLYMA_19G192700	GLYMA_17G113100	GLYMA_19G178000		GLYMA_18G004300
GLYMA_12G096900	GLYMA_15G149200	GLYMA_07G116700	GLYMA_13G113800	GLYMA_01G182100	GLYMA_03G056700	GLYMA_13G257200	GLYMA_05G048400	GLYMA_07G215600	GLYMA_07G155500		GLYMA_12G096900
GLYMA_10G138500	GLYMA_08G027000	GLYMA_02G224100	GLYMA_14G073600	GLYMA_01G164500	GLYMA_10G039500	GLYMA_10G208800	GLYMA_19G017000	GLYMA_09G201900	GLYMA_18G257900		GLYMA_10G138500
GLYMA_20G210900	GLYMA_07G052800	GLYMA_04G205000	GLYMA_17G042400	GLYMA_06G143400	GLYMA_16G155000	GLYMA_03G042700	GLYMA_09G095800	GLYMA_17G216100	GLYMA_07G095100		GLYMA_20G210900
GLYMA_14G186100	GLYMA_13G304200	GLYMA_02G010600	GLYMA_20G103600	GLYMA_19G198700	GLYMA_10G136300	GLYMA_02G171300	GLYMA_10G194000	GLYMA_15G034300	GLYMA_18G043800		GLYMA_14G186100
GLYMA_13G355600	GLYMA_03G200600	GLYMA_04G191100	GLYMA_09G070000	GLYMA_09G083700	GLYMA_20G207200	GLYMA_10G152300	GLYMA_18G228100	GLYMA_09G022300	GLYMA_15G114800		GLYMA_13G355600
GLYMA_08G314900	GLYMA_12G143800	GLYMA_06G119000	GLYMA_04G215900	GLYMA_03G143800	GLYMA_03G168200	GLYMA_16G173100	GLYMA_18G057800	GLYMA_02G309200	GLYMA_03G201000		GLYMA_08G314900
GLYMA_07G031700	GLYMA_04G041400	GLYMA_02G099600	GLYMA_08G315000	GLYMA_08G127900	GLYMA_20G036100	GLYMA_20G159200	GLYMA_07G020900	GLYMA_10G291700	GLYMA_06G166100		GLYMA_07G031700
GLYMA_02G222800	GLYMA_13G277800	GLYMA_20G164400	GLYMA_13G176000	GLYMA_01G062400	GLYMA_17G080400	GLYMA_13G040400	GLYMA_03G237800	GLYMA_17G085500	GLYMA_19G213900		GLYMA_02G222800
GLYMA_13G264400	GLYMA_04G173200	GLYMA_09G258700	GLYMA_03G101000	GLYMA_12G117100	GLYMA_07G055000	GLYMA_09G043900	GLYMA_17G127200	GLYMA_04G018400	GLYMA_11G223800		GLYMA_13G264400
GLYMA_14G085500	GLYMA_04G239600	GLYMA_06G096600	GLYMA_15G266100	GLYMA_13G112500	GLYMA_02G034200	GLYMA_08G335000	GLYMA_08G176600	GLYMA_02G212000	GLYMA_14G115500		GLYMA_14G085500
GLYMA_11G219400	GLYMA_09G070000	GLYMA_13G081000	GLYMA_14G214300	GLYMA_11G057800	GLYMA_06G122600	GLYMA_13G138600	GLYMA_13G089500	GLYMA_06G069900	GLYMA_08G249900		GLYMA_11G219400
GLYMA_11G174300	GLYMA_19G196200	GLYMA_14G189700	GLYMA_06G056000	GLYMA_02G060900	GLYMA_06G317800	GLYMA_14G049700	GLYMA_03G200400	GLYMA_09G032100	GLYMA_12G108900		GLYMA_11G174300
GLYMA_03G202400	GLYMA_08G303500	GLYMA_03G062500	GLYMA_18G096100	GLYMA_03G189100	GLYMA_13G153400	GLYMA_15G005000	GLYMA_17G016600	GLYMA_07G206000	GLYMA_13G056100		GLYMA_03G202400
GLYMA_13G087800	GLYMA_13G255800	GLYMA_08G249900	GLYMA_U044600	GLYMA_16G200400	GLYMA_04G028600	GLYMA_11G100600	GLYMA_02G034700	GLYMA_10G239700	GLYMA_13G110200		GLYMA_13G087800
GLYMA_08G201200	GLYMA_01G232400	GLYMA_13G215000	GLYMA_03G186900	GLYMA_04G158400	GLYMA_17G042400	GLYMA_17G113000	GLYMA_04G209200	GLYMA_10G258300	GLYMA_20G230400		GLYMA_08G201200
GLYMA_12G143800	GLYMA_09G009100	GLYMA_04G091300	GLYMA_10G065600	GLYMA_09G134100	GLYMA_10G059400	GLYMA_09G192700	GLYMA_18G048000	GLYMA_05G027500	GLYMA_03G202400		GLYMA_12G143800
GLYMA_13G214400	GLYMA_13G072100	GLYMA_06G190000	GLYMA_04G191200	GLYMA_11G142500	GLYMA_20G027000	GLYMA_08G144500	GLYMA_15G154900	GLYMA_02G087400	GLYMA_01G165900		GLYMA_13G214400
GLYMA_15G264100	GLYMA_10G195700	GLYMA_04G170800	GLYMA_19G255100	GLYMA_19G216100	GLYMA_08G345900	GLYMA_10G221700	GLYMA_01G158000	GLYMA_07G031700	GLYMA_13G315200		GLYMA_15G264100
GLYMA_03G044500	GLYMA_20G035200	GLYMA_19G183800	GLYMA_08G078500	GLYMA_08G333800	GLYMA_07G215700	GLYMA_18G154200	GLYMA_07G135100	GLYMA_18G077900	GLYMA_13G093300		GLYMA_03G044500
GLYMA_05G027500	GLYMA_03G148500	GLYMA_08G200900	GLYMA_06G211600	GLYMA_19G238400	GLYMA_15G118900	GLYMA_10G212100	GLYMA_06G184900	GLYMA_08G303100	GLYMA_14G169300		GLYMA_05G027500
GLYMA_04G190500	GLYMA_17G106900	GLYMA_13G299000	GLYMA_11G100600	GLYMA_13G356000	GLYMA_07G188100	GLYMA_19G219500	GLYMA_05G245400	GLYMA_03G188500	GLYMA_04G177900		GLYMA_04G190500
GLYMA_18G023500	GLYMA_13G266000	GLYMA_18G284900	GLYMA_05G225800	GLYMA_14G007000	GLYMA_09G161400	GLYMA_01G025000	GLYMA_15G005000	GLYMA_05G218400	GLYMA_18G215500		GLYMA_18G023500
GLYMA_06G308100	GLYMA_14G073300	GLYMA_11G130400	GLYMA_02G238600	GLYMA_13G046800	GLYMA_13G110200	GLYMA_08G253400	GLYMA_20G069700	GLYMA_18G013200	GLYMA_04G052000		GLYMA_06G308100
GLYMA_12G232200	GLYMA_11G251800	GLYMA_20G073000	GLYMA_18G261800	GLYMA_09G239100	GLYMA_10G044700	GLYMA_14G140900	GLYMA_10G231900	GLYMA_04G074500	GLYMA_03G165200		GLYMA_12G232200
GLYMA_15G030500	GLYMA_06G050500	GLYMA_20G130200	GLYMA_14G027800	GLYMA_08G180400	GLYMA_02G018900	GLYMA_15G021200	GLYMA_02G214300	GLYMA_09G028100	GLYMA_14G049500		GLYMA_15G030500
GLYMA_07G200200	GLYMA_16G018500	GLYMA_05G068400	GLYMA_10G028300	GLYMA_05G164200	GLYMA_17G108300	GLYMA_01G025200	GLYMA_06G237400	GLYMA_05G169700	GLYMA_18G111800		GLYMA_07G200200
GLYMA_02G264900	GLYMA_11G092600	GLYMA_13G051900	GLYMA_13G042500	GLYMA_13G101500	GLYMA_10G212100	GLYMA_05G025400	GLYMA_19G194100	GLYMA_13G048100	GLYMA_18G216200		GLYMA_02G264900
GLYMA_02G059500	GLYMA_03G047100	GLYMA_06G006100	GLYMA_11G254700	GLYMA_01G130400	GLYMA_06G022800	GLYMA_19G023200	GLYMA_06G096600	GLYMA_11G029500	GLYMA_14G088300		GLYMA_02G059500
GLYMA_02G172800	GLYMA_11G032200	GLYMA_03G211900	GLYMA_11G180000	GLYMA_19G192500	GLYMA_03G005600	GLYMA_10G291700	GLYMA_03G261900	GLYMA_05G064500	GLYMA_15G118900		GLYMA_02G172800
GLYMA_17G047200	GLYMA_03G246600	GLYMA_20G159200	GLYMA_14G158500	GLYMA_02G227200	GLYMA_09G087200	GLYMA_13G333100	GLYMA_15G270900	GLYMA_01G220600	GLYMA_15G267900		GLYMA_17G047200
GLYMA_03G224900	GLYMA_01G039900	GLYMA_02G302800	GLYMA_15G238600	GLYMA_10G198500	GLYMA_03G078200	GLYMA_10G063100	GLYMA_10G014100	GLYMA_07G135100	ENSRNA050001454		GLYMA_03G224900
GLYMA_20G193800	GLYMA_11G247700	GLYMA_18G001300	GLYMA_19G026900	GLYMA_16G181600	GLYMA_11G034000	GLYMA_07G248100	GLYMA_03G131700	GLYMA_01G048700	GLYMA_11G110900		GLYMA_20G193800
GLYMA_02G299800	GLYMA_13G241900	GLYMA_17G051100	GLYMA_03G041300	GLYMA_02G254900	GLYMA_20G132200	GLYMA_11G166900	GLYMA_03G250200	GLYMA_02G309300	GLYMA_10G185100		GLYMA_02G299800
GLYMA_13G079900	GLYMA_02G007000	GLYMA_18G103200	GLYMA_08G105300	GLYMA_02G203300	GLYMA_06G117200	GLYMA_20G150600	GLYMA_03G012800	GLYMA_10G019000	GLYMA_20G035200		GLYMA_13G079900
GLYMA_01G210500	GLYMA_15G263000	GLYMA_18G109600	GLYMA_11G127700	GLYMA_17G051100	GLYMA_08G229900	GLYMA_12G193700	GLYMA_02G182400	GLYMA_15G118500	GLYMA_20G179600		GLYMA_01G210500
GLYMA_15G267000	GLYMA_15G079100	GLYMA_10G118100	GLYMA_06G318200	GLYMA_18G121400	GLYMA_10G189700	GLYMA_14G216600	GLYMA_20G135500	GLYMA_13G211000	GLYMA_11G211100		GLYMA_15G267000
GLYMA_06G097300	GLYMA_16G210300	GLYMA_07G016300	GLYMA_06G117800	GLYMA_18G003800	GLYMA_02G100800	GLYMA_07G238400	GLYMA_05G075000	GLYMA_17G042400	GLYMA_11G084500		GLYMA_06G097300
GLYMA_01G208000	GLYMA_05G188700	GLYMA_04G004100	GLYMA_01G098700	GLYMA_17G042800	GLYMA_20G017800	GLYMA_08G335700	GLYMA_08G333800	GLYMA_15G006200	GLYMA_17G065100		GLYMA_01G208000
GLYMA_11G192600	GLYMA_15G195600	GLYMA_04G025300	GLYMA_18G016900	GLYMA_09G204100	GLYMA_20G213700	GLYMA_14G052500	GLYMA_11G113300	GLYMA_09G043200	GLYMA_16G141500		GLYMA_11G192600
GLYMA_15G019300	GLYMA_02G212000	GLYMA_13G308800	GLYMA_13G344800	GLYMA_09G222200	GLYMA_08G017000	GLYMA_14G085500	GLYMA_06G043900	GLYMA_04G215900	GLYMA_13G227900		GLYMA_15G019300
GLYMA_13G325900	GLYMA_07G248100	GLYMA_20G069700	GLYMA_08G155100	GLYMA_04G009600	GLYMA_07G200800	GLYMA_15G146800	GLYMA_10G290300	GLYMA_17G009900	GLYMA_15G056000		GLYMA_13G325900
GLYMA_12G207400	GLYMA_17G060100	GLYMA_20G196000	GLYMA_15G023500	GLYMA_19G236900	GLYMA_01G157100	GLYMA_06G160200	GLYMA_12G076700	GLYMA_20G236900	GLYMA_04G209800		GLYMA_12G207400
GLYMA_05G211400	GLYMA_18G222900	GLYMA_09G236900	GLYMA_13G114200	GLYMA_13G299000	GLYMA_08G209800	GLYMA_12G219700	GLYMA_04G009600	GLYMA_05G151400	GLYMA_18G068400		GLYMA_05G211400
GLYMA_04G042300	GLYMA_03G041000	GLYMA_08G020900	GLYMA_09G204100	GLYMA_10G065600	GLYMA_02G077200	GLYMA_19G143300	GLYMA_11G033900	GLYMA_10G052100	GLYMA_11G255500		GLYMA_04G042300
GLYMA_17G034900	GLYMA_05G245800	GLYMA_10G288300	GLYMA_11G220300	GLYMA_03G141900	GLYMA_07G155500	GLYMA_13G189600	GLYMA_14G169300	GLYMA_06G194000	GLYMA_02G123800		GLYMA_17G034900
GLYMA_07G265200	GLYMA_05G138800	GLYMA_18G074100	GLYMA_16G155100	GLYMA_06G086700	GLYMA_04G006400	GLYMA_14G052100	GLYMA_19G032100	GLYMA_13G280500	GLYMA_17G048700		GLYMA_07G265200
GLYMA_01G191600	GLYMA_13G245100	GLYMA_18G289100	GLYMA_04G243800	GLYMA_15G068400	GLYMA_18G076600	GLYMA_10G138500	GLYMA_08G191900	GLYMA_14G184000	GLYMA_17G224500		GLYMA_01G191600
GLYMA_09G009100	GLYMA_08G097600	GLYMA_18G003800	GLYMA_12G169600	GLYMA_15G146700	GLYMA_12G052500	GLYMA_16G206400	GLYMA_18G025300	GLYMA_06G064900	GLYMA_19G215800		GLYMA_09G009100
GLYMA_06G124300	GLYMA_14G194900	GLYMA_13G305100	GLYMA_06G082700	GLYMA_17G060400	GLYMA_18G046100	GLYMA_05G056100	GLYMA_20G203100	GLYMA_09G238800	GLYMA_10G058900		GLYMA_06G124300
GLYMA_12G070700	GLYMA_06G018700	GLYMA_08G332900	GLYMA_12G018900	GLYMA_05G178300	GLYMA_13G244000	GLYMA_03G237600	GLYMA_15G149900	GLYMA_12G117100	GLYMA_01G151300		GLYMA_12G070700
GLYMA_06G114500	GLYMA_12G012000	GLYMA_04G033100	GLYMA_03G141300	GLYMA_02G108700	GLYMA_15G161200	GLYMA_13G174400	GLYMA_13G053000	GLYMA_03G193300	GLYMA_13G153400		GLYMA_06G114500
GLYMA_03G179100	GLYMA_13G257200	GLYMA_16G155100	GLYMA_11G058600	GLYMA_18G016900	GLYMA_03G202800	GLYMA_16G012700	GLYMA_12G163400	GLYMA_10G117200	GLYMA_06G100500		GLYMA_03G179100
GLYMA_12G236600	GLYMA_12G080700	GLYMA_13G079900	GLYMA_20G235400	GLYMA_10G221700	GLYMA_11G092900	GLYMA_05G175500	GLYMA_08G201200	GLYMA_14G179200	GLYMA_02G024200		GLYMA_12G236600
GLYMA_19G123500	GLYMA_12G053800	GLYMA_09G134100	GLYMA_10G026800	GLYMA_18G181800	GLYMA_16G152300	GLYMA_04G238600	GLYMA_10G017000	GLYMA_01G037600	GLYMA_13G199300		GLYMA_19G123500
GLYMA_12G076700	GLYMA_06G122600	GLYMA_19G160100	GLYMA_19G243500	GLYMA_02G269000	GLYMA_17G098100	GLYMA_12G096700	GLYMA_14G028200	GLYMA_16G133400	GLYMA_19G150900		GLYMA_12G076700
GLYMA_08G174300	GLYMA_13G369900	GLYMA_18G007100	GLYMA_17G106800	GLYMA_20G243000	GLYMA_15G063600	GLYMA_13G101500	GLYMA_10G211000	GLYMA_13G298100	GLYMA_20G154400		GLYMA_08G174300
GLYMA_02G265700	GLYMA_18G260900	GLYMA_16G152600	GLYMA_03G141900	GLYMA_01G048800	GLYMA_15G020900	GLYMA_05G233300	GLYMA_17G021400	GLYMA_06G319300	GLYMA_14G224000		GLYMA_02G265700
GLYMA_13G030900	GLYMA_12G187500	GLYMA_01G058400	GLYMA_14G128500	GLYMA_11G127700	GLYMA_19G224500	GLYMA_05G214400	GLYMA_06G067000	GLYMA_11G233800	GLYMA_02G045600		GLYMA_13G030900
GLYMA_07G050000	GLYMA_13G342000	GLYMA_04G220700	GLYMA_07G135100	GLYMA_09G087100	GLYMA_13G299000	GLYMA_07G229000	GLYMA_17G048700	GLYMA_15G224500	GLYMA_01G049400		GLYMA_07G050000
GLYMA_20G173900	GLYMA_13G211800	GLYMA_08G212300	GLYMA_08G079200	GLYMA_12G063400	GLYMA_04G252700	GLYMA_04G040200	GLYMA_07G209300	GLYMA_11G247500	GLYMA_06G284400		GLYMA_20G173900
GLYMA_13G354900	GLYMA_06G270400	GLYMA_11G141700	GLYMA_14G086600	GLYMA_05G203500	GLYMA_04G217600	GLYMA_13G176000	GLYMA_03G247000	GLYMA_04G205300	GLYMA_19G023200		GLYMA_13G354900
GLYMA_09G087100	GLYMA_09G073000	GLYMA_13G097100	GLYMA_10G017600	GLYMA_06G271400	GLYMA_13G241200	GLYMA_17G146500	GLYMA_11G166900	GLYMA_05G118300	GLYMA_02G259200		GLYMA_09G087100
GLYMA_04G215900	GLYMA_07G049900	GLYMA_13G350000	GLYMA_01G048800	GLYMA_02G171300	GLYMA_15G063000	GLYMA_18G010500	GLYMA_14G078000	GLYMA_16G145200	GLYMA_01G048700		GLYMA_04G215900
GLYMA_04G075700	GLYMA_20G062500	GLYMA_19G150900	GLYMA_20G216300	GLYMA_13G151800	GLYMA_19G141200	GLYMA_14G214300	GLYMA_15G130900	GLYMA_08G079100	GLYMA_06G028700		GLYMA_04G075700
GLYMA_17G098100	GLYMA_01G241100	GLYMA_08G073300	GLYMA_17G076000	GLYMA_15G089000	GLYMA_18G158900	GLYMA_09G040300	GLYMA_10G053000	GLYMA_11G076100	GLYMA_13G087800		GLYMA_17G098100
GLYMA_02G309200	GLYMA_10G015900	GLYMA_06G083600	GLYMA_02G068900	GLYMA_03G247000	GLYMA_06G125200	GLYMA_12G178900	GLYMA_14G194200	GLYMA_13G257200	GLYMA_10G025700		GLYMA_02G309200
GLYMA_06G113400	GLYMA_13G163900	GLYMA_06G264700	GLYMA_13G310700	GLYMA_18G101700	GLYMA_08G146200	GLYMA_19G033500	GLYMA_01G034900	GLYMA_14G215400	GLYMA_01G187400		GLYMA_06G113400
GLYMA_03G217300	GLYMA_15G271400	GLYMA_16G145200	GLYMA_09G022400	GLYMA_04G205300	GLYMA_18G111800	GLYMA_03G201700	GLYMA_16G102400	GLYMA_11G057800	GLYMA_14G007000		GLYMA_03G217300
GLYMA_01G169300	GLYMA_11G133900	GLYMA_06G284700	GLYMA_06G139000	GLYMA_16G173100	GLYMA_07G248000	GLYMA_18G138000	GLYMA_15G048100	GLYMA_11G071600	GLYMA_14G201200		GLYMA_01G169300
GLYMA_19G022500	GLYMA_18G175300	GLYMA_19G198000	GLYMA_12G195200	GLYMA_06G103700	GLYMA_07G000500	GLYMA_10G029000	GLYMA_15G131000	GLYMA_08G201700	GLYMA_04G132700		GLYMA_19G022500
GLYMA_10G041800	GLYMA_11G075000	GLYMA_01G106100	GLYMA_03G050500	GLYMA_10G227700	GLYMA_01G133200	GLYMA_08G177200	GLYMA_10G212100	GLYMA_12G215700	GLYMA_20G080400		GLYMA_10G041800
GLYMA_07G242700	GLYMA_18G010500	GLYMA_05G228100	GLYMA_01G040200	GLYMA_10G291700	GLYMA_14G015700	GLYMA_01G134600	GLYMA_18G198100	GLYMA_12G076700	GLYMA_12G007000		GLYMA_07G242700
GLYMA_02G189700	GLYMA_06G026900	GLYMA_05G085400	GLYMA_19G143300	GLYMA_12G201400	GLYMA_02G196000	GLYMA_02G145100	GLYMA_01G195900	GLYMA_10G237800	GLYMA_08G235900		GLYMA_02G189700
GLYMA_08G165700	GLYMA_18G221400	GLYMA_13G156400	GLYMA_01G216600	GLYMA_15G005000	GLYMA_12G064000	GLYMA_17G016600	GLYMA_13G088300	GLYMA_01G200500	GLYMA_07G022400		GLYMA_08G165700
GLYMA_07G079600	GLYMA_16G095900	GLYMA_04G184500	GLYMA_07G057600	GLYMA_20G186200	GLYMA_05G235800	GLYMA_20G233000	GLYMA_03G129600	GLYMA_08G043600	GLYMA_13G172600		GLYMA_07G079600
GLYMA_01G107300	GLYMA_05G090900	GLYMA_02G171300	GLYMA_03G200100	GLYMA_11G251800	GLYMA_15G224500	GLYMA_13G281600	GLYMA_18G101700	GLYMA_07G054700	GLYMA_01G218600		GLYMA_01G107300
GLYMA_02G283400	GLYMA_U025400	GLYMA_15G122900	GLYMA_10G125000	GLYMA_15G169300	GLYMA_03G193500	GLYMA_08G289300	GLYMA_15G202100	GLYMA_13G159000	GLYMA_17G050900		GLYMA_02G283400
GLYMA_09G244400	GLYMA_13G214600	GLYMA_04G127900	GLYMA_05G148500	GLYMA_11G170000	GLYMA_03G042700	GLYMA_15G048500	GLYMA_09G138500	GLYMA_05G190800	GLYMA_15G011700		GLYMA_09G244400
GLYMA_07G154500	GLYMA_09G003400	GLYMA_13G281600	GLYMA_11G130900	GLYMA_08G252700	GLYMA_17G069100	GLYMA_13G046600	GLYMA_04G025300	GLYMA_12G056700	GLYMA_20G150300		GLYMA_07G154500
GLYMA_11G221000	GLYMA_08G204500	GLYMA_13G177400	GLYMA_19G260000	GLYMA_09G043200	GLYMA_07G235900	GLYMA_07G266700	GLYMA_20G115900	GLYMA_20G137700	GLYMA_20G083800		GLYMA_11G221000
GLYMA_18G012800	GLYMA_18G060900	GLYMA_02G148200	GLYMA_20G234200	GLYMA_18G123100	GLYMA_02G022700	GLYMA_02G148200	GLYMA_17G035000	GLYMA_15G050300	GLYMA_17G152800		GLYMA_18G012800
GLYMA_06G022800	GLYMA_08G077000	GLYMA_01G115500	GLYMA_02G097000	GLYMA_16G152900	GLYMA_09G280800	GLYMA_19G026000	GLYMA_13G228300	GLYMA_17G031500	GLYMA_10G066700		GLYMA_06G022800
GLYMA_11G104100	GLYMA_09G278800	GLYMA_15G181800	GLYMA_05G138100	GLYMA_08G158800	GLYMA_04G223600	GLYMA_02G042600	GLYMA_14G188300	GLYMA_13G046700	GLYMA_06G166800		GLYMA_11G104100
GLYMA_02G219800	GLYMA_02G026300	GLYMA_13G293700	GLYMA_02G068800	GLYMA_13G224800	GLYMA_12G145900	GLYMA_18G009300	GLYMA_04G094700	GLYMA_09G126100	GLYMA_16G200400		GLYMA_02G219800
GLYMA_01G160300	GLYMA_10G211000	GLYMA_07G049900	GLYMA_06G307100	GLYMA_07G139700	GLYMA_05G206500	GLYMA_12G199300	GLYMA_02G260100	GLYMA_11G176000	GLYMA_06G263900		GLYMA_01G160300
GLYMA_20G236900	GLYMA_12G096900	GLYMA_08G074700	GLYMA_02G121400	GLYMA_08G001200	GLYMA_11G032000	GLYMA_11G034800	GLYMA_05G175500	GLYMA_10G053000	GLYMA_17G154300		GLYMA_20G236900
GLYMA_08G252700	GLYMA_08G122400	GLYMA_19G219500	GLYMA_16G173100	GLYMA_15G122900	GLYMA_14G021800	GLYMA_01G208000	GLYMA_15G057700	GLYMA_10G251400	GLYMA_18G046100		GLYMA_08G252700
GLYMA_13G069900	GLYMA_06G175200	GLYMA_19G086700	GLYMA_13G110200	GLYMA_19G106700	GLYMA_13G257000	GLYMA_08G249900	GLYMA_15G077600	GLYMA_13G303000	GLYMA_12G173800		GLYMA_13G069900
GLYMA_18G273000	GLYMA_05G207900	GLYMA_08G289300	GLYMA_06G300900	GLYMA_03G206800	GLYMA_14G069400	GLYMA_08G017000	GLYMA_05G210900	GLYMA_13G059700	GLYMA_02G172800		GLYMA_18G273000
GLYMA_05G211700	GLYMA_11G212700	GLYMA_12G129500	GLYMA_02G022700	GLYMA_02G299200	GLYMA_06G149500	ENSRNA050001454	GLYMA_02G241800	GLYMA_19G178000	GLYMA_02G143300		GLYMA_05G211700
GLYMA_13G353800	GLYMA_09G188600	GLYMA_04G158400	GLYMA_03G103800	GLYMA_08G068900	GLYMA_11G037900	GLYMA_12G240000	GLYMA_02G202500	GLYMA_07G271200	GLYMA_20G033900		GLYMA_13G353800
GLYMA_05G189500	GLYMA_08G105300	GLYMA_05G056100	GLYMA_16G210300	GLYMA_12G206000	GLYMA_19G175200	GLYMA_08G147900	GLYMA_16G121000	GLYMA_08G163100	GLYMA_10G021300		GLYMA_05G189500
GLYMA_10G112800	GLYMA_13G099500	GLYMA_01G211000	GLYMA_18G206000	GLYMA_13G306300	GLYMA_11G158800	GLYMA_08G070300	GLYMA_18G059300	GLYMA_01G018800	GLYMA_08G201700		GLYMA_10G112800
GLYMA_12G145900	GLYMA_15G237600	GLYMA_08G201700	GLYMA_05G203500	GLYMA_13G189600	GLYMA_16G207700	GLYMA_15G069900	GLYMA_04G041400	GLYMA_12G134200	GLYMA_16G200900		GLYMA_12G145900
GLYMA_04G091300	GLYMA_01G224600	GLYMA_11G041900	GLYMA_11G166500	GLYMA_15G276100	GLYMA_02G217900	GLYMA_16G133400	GLYMA_18G031800	GLYMA_10G227700	GLYMA_14G220100		GLYMA_04G091300
GLYMA_12G197900	GLYMA_09G153900	GLYMA_01G095500	GLYMA_02G277600	GLYMA_11G244200	GLYMA_02G227700	GLYMA_09G039500	GLYMA_17G049800	GLYMA_13G354400	GLYMA_19G071600		GLYMA_12G197900
GLYMA_04G009600	GLYMA_08G164200	GLYMA_08G329900	GLYMA_17G048700	GLYMA_08G360800	GLYMA_15G237600	GLYMA_10G061300	GLYMA_17G139000	GLYMA_02G297800	GLYMA_02G209600		GLYMA_04G009600
GLYMA_10G002200	GLYMA_11G228000	GLYMA_17G060600	GLYMA_10G113200	GLYMA_18G300800	GLYMA_13G318600	GLYMA_13G333900	GLYMA_20G073000	GLYMA_11G213100	GLYMA_13G276600		GLYMA_10G002200
GLYMA_11G141700	GLYMA_18G259600	GLYMA_11G105100	GLYMA_U029700	GLYMA_12G223500	GLYMA_10G065600	GLYMA_19G169200	GLYMA_20G017800	GLYMA_07G020900	GLYMA_18G003800		GLYMA_11G141700
GLYMA_04G223100	GLYMA_12G227300	GLYMA_14G170700	GLYMA_12G165100	GLYMA_19G212600	GLYMA_03G050100	GLYMA_17G031200	GLYMA_16G172400	GLYMA_15G048100	GLYMA_05G156400		GLYMA_04G223100
GLYMA_09G134100	GLYMA_15G114900	GLYMA_17G008800	GLYMA_19G123200	GLYMA_19G244300	GLYMA_13G354400	GLYMA_01G188800	GLYMA_16G012700	GLYMA_17G127300	GLYMA_07G207000		GLYMA_09G134100
GLYMA_06G069900	GLYMA_13G227300	GLYMA_05G098700	GLYMA_06G136800	GLYMA_10G161900	GLYMA_16G164200	GLYMA_02G185100	GLYMA_15G104600	GLYMA_20G205300	GLYMA_14G203700		GLYMA_06G069900
GLYMA_07G076600	GLYMA_14G069100	GLYMA_07G261800	GLYMA_08G027000	GLYMA_19G156000	GLYMA_13G245600	GLYMA_09G168400	GLYMA_10G133900	GLYMA_16G221500	GLYMA_06G134800		GLYMA_07G076600
GLYMA_15G237600	GLYMA_13G046700	GLYMA_11G067500	GLYMA_12G240000	GLYMA_01G007800	GLYMA_17G069200	GLYMA_04G255600	GLYMA_07G054700	GLYMA_09G278200	GLYMA_20G153300		GLYMA_15G237600
GLYMA_06G080900	GLYMA_04G179400	GLYMA_04G102400	GLYMA_19G197700	GLYMA_11G104200	GLYMA_09G180300	GLYMA_11G143100	GLYMA_06G240900	GLYMA_02G299200	GLYMA_17G223800		GLYMA_06G080900
GLYMA_02G233200	GLYMA_09G206300	GLYMA_18G067800	GLYMA_08G297000	GLYMA_03G176300	GLYMA_01G127400	GLYMA_06G083600	GLYMA_18G249800	GLYMA_17G100200	GLYMA_12G219700		GLYMA_02G233200
GLYMA_05G210900	GLYMA_10G254500	GLYMA_14G042600	GLYMA_18G232800	GLYMA_19G022500	GLYMA_09G238800	GLYMA_11G067500	GLYMA_12G101800	GLYMA_02G068800	GLYMA_07G133800		GLYMA_05G210900
GLYMA_07G207400	GLYMA_02G063900	GLYMA_18G138000	GLYMA_20G231800	GLYMA_04G209200	GLYMA_08G147900	GLYMA_17G127200	GLYMA_07G165700	GLYMA_06G044500	GLYMA_06G187000		GLYMA_07G207400
GLYMA_01G216600	GLYMA_02G257300	GLYMA_11G166500	GLYMA_13G361700	GLYMA_01G035000	GLYMA_15G100100	GLYMA_16G145000	GLYMA_12G164000	GLYMA_02G310800	GLYMA_10G139300		GLYMA_01G216600
GLYMA_14G009000	GLYMA_14G128500	GLYMA_09G134200	GLYMA_09G156700	GLYMA_11G157000	GLYMA_03G184000	GLYMA_07G022400	GLYMA_05G203500	GLYMA_01G195900	GLYMA_02G110300		GLYMA_14G009000
GLYMA_08G089800	GLYMA_19G057300	GLYMA_19G213900	GLYMA_07G032300	GLYMA_18G232800	GLYMA_10G269200	GLYMA_02G100800	GLYMA_04G091300	GLYMA_13G151800	GLYMA_13G308800		GLYMA_08G089800
GLYMA_07G054700	GLYMA_03G082900	GLYMA_08G290600	GLYMA_02G311900	GLYMA_04G004200	GLYMA_02G308300	GLYMA_08G105600	GLYMA_11G220300	GLYMA_20G102600	GLYMA_02G135700		GLYMA_07G054700
GLYMA_12G110100	GLYMA_10G053000	GLYMA_05G092400	GLYMA_07G084200	GLYMA_11G254700	GLYMA_09G010600	GLYMA_05G003900	GLYMA_07G025800	GLYMA_17G138300	GLYMA_07G081400		GLYMA_12G110100
GLYMA_10G026800	GLYMA_19G112700	GLYMA_03G179100	GLYMA_05G102800	GLYMA_13G272500	GLYMA_10G260200	GLYMA_01G175300	GLYMA_13G004200	GLYMA_18G111600	GLYMA_11G036100		GLYMA_10G026800
GLYMA_02G171100	GLYMA_15G005000	GLYMA_01G191600	GLYMA_20G221400	GLYMA_09G140600	GLYMA_13G241900	GLYMA_06G249800	GLYMA_07G070400	GLYMA_03G063900	GLYMA_17G080400		GLYMA_02G171100
GLYMA_10G072000	GLYMA_17G012300	GLYMA_01G009700	GLYMA_05G237300	GLYMA_11G083600	GLYMA_09G087100	GLYMA_05G156400	GLYMA_11G045800	GLYMA_05G144100	GLYMA_18G059300		GLYMA_10G072000
GLYMA_18G206000	GLYMA_13G214100	GLYMA_13G257200	GLYMA_11G092900	GLYMA_06G270400	GLYMA_18G009900	GLYMA_03G029800	GLYMA_01G072800	GLYMA_11G041600	GLYMA_01G120400		GLYMA_18G206000
GLYMA_16G120200	GLYMA_08G326000	GLYMA_02G026300	GLYMA_17G215400	GLYMA_03G134900	GLYMA_10G163500	GLYMA_09G173700	GLYMA_01G098700	GLYMA_18G009500	GLYMA_14G015300		GLYMA_16G120200
GLYMA_16G084700	GLYMA_20G179700	GLYMA_02G138200	GLYMA_11G192600	GLYMA_18G223200	GLYMA_01G183100	GLYMA_07G110900	GLYMA_18G269700	GLYMA_12G044600	GLYMA_02G252500		GLYMA_16G084700
GLYMA_07G138000	GLYMA_05G029700	GLYMA_13G151800	GLYMA_16G040400	GLYMA_08G285400	GLYMA_15G276300	GLYMA_09G083700	GLYMA_17G042900	GLYMA_07G087100	GLYMA_09G225400		GLYMA_07G138000
GLYMA_13G099500	GLYMA_07G226700	GLYMA_13G062800	GLYMA_20G064100	GLYMA_06G202200	GLYMA_14G169300	GLYMA_09G275200	GLYMA_12G215700	GLYMA_09G134200	GLYMA_07G144000		GLYMA_13G099500
GLYMA_15G154900	GLYMA_11G003000	GLYMA_15G079100	ENSRNA050030627	GLYMA_04G035700	GLYMA_19G005900	GLYMA_13G081400	GLYMA_10G063100	GLYMA_14G146900	GLYMA_10G011500		GLYMA_15G154900
GLYMA_12G006500	GLYMA_11G067400	GLYMA_11G033900	GLYMA_07G167000	GLYMA_19G074300	GLYMA_14G207500	GLYMA_01G197300	GLYMA_15G004300	GLYMA_11G059200	GLYMA_08G071100		GLYMA_12G006500
ENSRNA050000762	GLYMA_07G159100	GLYMA_09G069900	GLYMA_09G238800	GLYMA_08G184200	GLYMA_06G140100	GLYMA_12G164000	GLYMA_07G052800	GLYMA_04G004600	GLYMA_07G110900		ENSRNA050000762
GLYMA_17G048500	GLYMA_10G045700	GLYMA_01G120400	GLYMA_11G000600	GLYMA_06G165100	GLYMA_12G173300	GLYMA_04G187600	GLYMA_04G033100	GLYMA_13G087100	GLYMA_15G032600		GLYMA_17G048500
GLYMA_18G225100	GLYMA_15G145000	GLYMA_04G018400	GLYMA_02G227400	GLYMA_02G033400	GLYMA_05G190300	GLYMA_08G324700	GLYMA_02G007400	GLYMA_16G218700	GLYMA_14G206200		GLYMA_18G225100
GLYMA_20G083800	GLYMA_16G120200	GLYMA_08G275500	GLYMA_06G316700	GLYMA_08G325600	GLYMA_15G131500	GLYMA_09G022000	GLYMA_18G042100	GLYMA_17G027300	GLYMA_13G196500		GLYMA_20G083800
GLYMA_04G127100	GLYMA_18G111400	GLYMA_17G076000	GLYMA_05G009800	GLYMA_17G017200	GLYMA_05G064500	GLYMA_02G227200	GLYMA_06G097300	GLYMA_18G223100	GLYMA_14G194300		GLYMA_04G127100
GLYMA_09G043200	GLYMA_16G207700	GLYMA_04G009600	GLYMA_07G088300	GLYMA_17G049800	GLYMA_20G131700	GLYMA_19G205500	GLYMA_18G078000	GLYMA_01G230900	GLYMA_11G160600		GLYMA_09G043200
GLYMA_06G235000	GLYMA_08G085200	GLYMA_08G253400	GLYMA_18G266200	GLYMA_04G187600	GLYMA_07G200200	GLYMA_17G035000	GLYMA_14G122900	GLYMA_10G260200	GLYMA_15G020900		GLYMA_06G235000
GLYMA_04G104200	GLYMA_16G155100	GLYMA_09G278200	GLYMA_11G234000	GLYMA_19G215600	GLYMA_12G002000	GLYMA_07G054700	GLYMA_03G063000	GLYMA_07G006500	GLYMA_10G041800		GLYMA_04G104200
GLYMA_04G179400	GLYMA_11G111100	GLYMA_05G161500	GLYMA_09G221000	GLYMA_03G183100	GLYMA_06G068800	GLYMA_01G052300	GLYMA_18G175300	GLYMA_04G222000	GLYMA_01G200500		GLYMA_04G179400
GLYMA_13G163900	GLYMA_07G227700	GLYMA_19G221000	GLYMA_20G203000	GLYMA_08G335700	GLYMA_12G197000	GLYMA_20G213700	GLYMA_13G147600	GLYMA_13G131400	GLYMA_02G007000		GLYMA_13G163900
GLYMA_18G106200	GLYMA_11G067700	GLYMA_10G076100	GLYMA_09G187700	GLYMA_13G205400	GLYMA_08G210200	GLYMA_12G211400	GLYMA_04G196100	GLYMA_01G023200	GLYMA_13G221700		GLYMA_18G106200
GLYMA_01G218200	GLYMA_17G075300	GLYMA_08G079100	GLYMA_15G055600	GLYMA_13G248200	GLYMA_03G260600	GLYMA_01G048700	GLYMA_14G053100	GLYMA_11G215600	GLYMA_12G023200		GLYMA_01G218200
GLYMA_14G150100	GLYMA_05G208500	GLYMA_10G072000	GLYMA_04G062000	GLYMA_01G104600	GLYMA_01G224400	GLYMA_02G093400	GLYMA_05G092400	GLYMA_10G277200	GLYMA_19G179800		GLYMA_14G150100
GLYMA_08G038300	GLYMA_01G038600	GLYMA_15G050400	GLYMA_13G228900	GLYMA_09G263100	GLYMA_03G203200	GLYMA_08G200900	GLYMA_13G119000	GLYMA_20G151800	GLYMA_14G015700		GLYMA_08G038300
GLYMA_03G125000	GLYMA_09G025500	GLYMA_05G211400	GLYMA_03G179100	GLYMA_15G202100	GLYMA_18G011600	GLYMA_13G042500	GLYMA_08G347000	GLYMA_11G174100	GLYMA_12G072900		GLYMA_03G125000
GLYMA_02G097000	GLYMA_14G205000	GLYMA_17G048500	GLYMA_17G166900	GLYMA_17G224600	GLYMA_15G012700	GLYMA_19G120700	GLYMA_11G097300	GLYMA_06G215200	GLYMA_10G138500		GLYMA_02G097000
GLYMA_08G255200	GLYMA_08G245500	GLYMA_06G063200	GLYMA_13G241200	GLYMA_01G129100	GLYMA_02G007400	GLYMA_19G026900	GLYMA_05G169000	GLYMA_13G127300	GLYMA_01G208800		GLYMA_08G255200
GLYMA_18G275300	GLYMA_14G204500	GLYMA_20G149900	GLYMA_14G145700	GLYMA_17G099800	GLYMA_14G224000	GLYMA_02G056000	GLYMA_05G151400	GLYMA_08G052400	GLYMA_13G361700		GLYMA_18G275300
GLYMA_17G139000	GLYMA_04G052000	GLYMA_08G127900	GLYMA_07G186700	GLYMA_06G037900	GLYMA_17G041200	GLYMA_06G164800	GLYMA_06G077500	GLYMA_18G059300	GLYMA_20G112200		GLYMA_17G139000
GLYMA_04G242400	GLYMA_10G221700	GLYMA_11G178200	GLYMA_18G037900	GLYMA_06G113500	GLYMA_12G195200	GLYMA_18G031800	GLYMA_09G272900	GLYMA_06G006100	GLYMA_03G219200		GLYMA_04G242400
GLYMA_20G090800	GLYMA_17G113100	GLYMA_13G362800	GLYMA_08G038300	GLYMA_12G216300	GLYMA_19G233900	GLYMA_08G107400	GLYMA_19G112700	GLYMA_18G271900	GLYMA_04G013500		GLYMA_20G090800
GLYMA_19G112700	GLYMA_07G213900	GLYMA_19G146900	GLYMA_04G129900	GLYMA_09G281100	GLYMA_18G152800	GLYMA_15G271000	GLYMA_08G017000	GLYMA_10G118100	GLYMA_08G255800		GLYMA_19G112700
GLYMA_05G151400	GLYMA_07G260600	GLYMA_16G218700	GLYMA_12G232200	GLYMA_02G022700	GLYMA_19G240700	GLYMA_02G110300	GLYMA_08G287400	GLYMA_10G139300	GLYMA_04G075700		GLYMA_05G151400
GLYMA_01G095500	GLYMA_07G030400	GLYMA_18G073500	GLYMA_19G205800	GLYMA_11G174300	GLYMA_14G216600	GLYMA_20G237500	GLYMA_20G203000	GLYMA_06G136100	GLYMA_02G108600		GLYMA_01G095500
GLYMA_06G028700	GLYMA_15G162800	GLYMA_07G105000	GLYMA_07G199000	GLYMA_03G028000	GLYMA_08G306200	GLYMA_07G264100	GLYMA_03G031600	GLYMA_04G182300	GLYMA_09G280800		GLYMA_06G028700
GLYMA_04G039600	GLYMA_05G037800	GLYMA_13G187000	GLYMA_06G035300	GLYMA_13G062800	GLYMA_11G160000	GLYMA_02G138200	GLYMA_19G005800	GLYMA_15G240700	GLYMA_16G218300		GLYMA_04G039600
GLYMA_16G109300	GLYMA_U038300	GLYMA_03G227600	GLYMA_16G050400	GLYMA_08G070300	GLYMA_07G229000	GLYMA_02G051700	GLYMA_19G183800	GLYMA_09G222200	GLYMA_07G139700		GLYMA_16G109300
GLYMA_04G048600	GLYMA_14G049700	GLYMA_10G193200	GLYMA_07G181400	GLYMA_13G178700	GLYMA_13G080500	GLYMA_16G217700	GLYMA_13G101500	GLYMA_04G181500	GLYMA_14G029800		GLYMA_04G048600
GLYMA_07G144700	GLYMA_08G079200	GLYMA_19G026900	GLYMA_13G085500	GLYMA_11G019000	GLYMA_17G085500	GLYMA_01G038600	GLYMA_13G098000	GLYMA_13G094500	GLYMA_05G075000		GLYMA_07G144700
GLYMA_07G056200	GLYMA_09G261400	GLYMA_17G127300	GLYMA_19G021400	GLYMA_11G019100	GLYMA_02G011500	GLYMA_17G046000	GLYMA_06G269200	GLYMA_18G014500	GLYMA_10G077800		GLYMA_07G056200
GLYMA_12G064000	GLYMA_03G242100	GLYMA_06G017600	GLYMA_10G243800	GLYMA_04G191100	GLYMA_14G091500	GLYMA_04G035700	GLYMA_09G029600	GLYMA_06G122600	GLYMA_10G118100		GLYMA_12G064000
ENSRNA050001454	GLYMA_15G203000	GLYMA_20G131700	GLYMA_02G189700	GLYMA_13G051000	GLYMA_10G151300	GLYMA_04G151000	GLYMA_20G150300	GLYMA_02G233200	GLYMA_02G222800		ENSRNA050001454
GLYMA_14G038800	GLYMA_15G161200	GLYMA_01G213800	GLYMA_11G008300	GLYMA_02G268200	GLYMA_11G235200	GLYMA_17G058400	GLYMA_02G059500	GLYMA_15G170500	GLYMA_02G097000		GLYMA_14G038800
GLYMA_12G117100	GLYMA_03G089400	GLYMA_10G066100	GLYMA_17G227400	GLYMA_18G014500	GLYMA_18G043900	GLYMA_10G060700	GLYMA_15G181600	GLYMA_10G261100	GLYMA_20G236900		GLYMA_12G117100
GLYMA_17G185800	GLYMA_16G145000	GLYMA_20G230400	GLYMA_15G069700	GLYMA_09G216600	GLYMA_13G233700	GLYMA_05G246500	GLYMA_04G113800	GLYMA_02G129300	GLYMA_11G215800		GLYMA_17G185800
GLYMA_03G021700	GLYMA_17G034900	GLYMA_07G270900	GLYMA_17G127000	GLYMA_04G091300	GLYMA_13G311100	GLYMA_15G202100	GLYMA_19G186200	GLYMA_05G190300	GLYMA_12G207400		GLYMA_03G021700
GLYMA_02G148300	GLYMA_13G120800	GLYMA_16G141500	GLYMA_09G159600	GLYMA_20G126700	GLYMA_02G205000	GLYMA_06G018100	GLYMA_19G178100	GLYMA_02G100800	GLYMA_07G209300		GLYMA_02G148300
GLYMA_06G134800	GLYMA_09G239100	GLYMA_03G246000	GLYMA_13G224800	GLYMA_01G071300	GLYMA_18G138000	GLYMA_07G105000	GLYMA_17G205800	GLYMA_18G288800	GLYMA_06G157800		GLYMA_06G134800
GLYMA_03G107900	GLYMA_15G019300	GLYMA_13G233900	GLYMA_13G067400	GLYMA_06G022800	GLYMA_09G038200	GLYMA_11G113300	GLYMA_13G204300	GLYMA_01G115000	GLYMA_05G169000		GLYMA_03G107900
GLYMA_04G252700	GLYMA_06G142200	GLYMA_05G169000	GLYMA_15G015400	GLYMA_08G261100	GLYMA_10G237800	GLYMA_01G170200	GLYMA_10G044700	GLYMA_20G126700	GLYMA_11G176000		GLYMA_04G252700
GLYMA_03G074600	GLYMA_11G071100	GLYMA_06G113400	GLYMA_09G058100	GLYMA_11G067400	GLYMA_01G171300	GLYMA_12G052100	GLYMA_10G060700	GLYMA_02G013000	GLYMA_03G157300		GLYMA_03G074600
GLYMA_06G096600	GLYMA_U038600	GLYMA_11G058400	GLYMA_06G034300	GLYMA_17G020900	GLYMA_15G267000	GLYMA_10G249600	GLYMA_08G107400	GLYMA_19G210700	GLYMA_16G056300		GLYMA_06G096600
GLYMA_16G016700	GLYMA_17G080700	GLYMA_03G193300	GLYMA_06G084800	GLYMA_01G236300	GLYMA_16G084300	GLYMA_17G060400	GLYMA_08G035000	GLYMA_04G255500	GLYMA_09G181200		GLYMA_16G016700
GLYMA_17G239200	GLYMA_18G109500	GLYMA_07G135100	GLYMA_09G087100	GLYMA_11G055200	GLYMA_07G215600	GLYMA_06G039800	GLYMA_14G091000	GLYMA_19G213900	GLYMA_01G109500		GLYMA_17G239200
GLYMA_11G073100	GLYMA_02G211900	GLYMA_07G240200	GLYMA_14G200800	GLYMA_18G260500	GLYMA_06G078300	GLYMA_13G172100	GLYMA_10G261600	GLYMA_03G197900	GLYMA_12G140200		GLYMA_11G073100
GLYMA_17G075300	GLYMA_12G145900	GLYMA_02G311900	GLYMA_08G180900	GLYMA_16G155100	GLYMA_16G091100	GLYMA_08G299200	GLYMA_07G015400	GLYMA_13G299000	GLYMA_11G057800		GLYMA_17G075300
GLYMA_20G229000	GLYMA_08G325600	GLYMA_10G061300	GLYMA_06G235500	GLYMA_13G042500	GLYMA_10G209800	GLYMA_20G017800	GLYMA_19G022500	GLYMA_06G050500	GLYMA_02G077200		GLYMA_20G229000
GLYMA_19G205500	GLYMA_06G307000	GLYMA_14G038800	GLYMA_10G172200	GLYMA_12G073700	GLYMA_07G121900	GLYMA_08G180500	GLYMA_08G335700	GLYMA_05G218300	GLYMA_06G177400		GLYMA_19G205500
GLYMA_11G139800	GLYMA_09G211100	GLYMA_07G091400	GLYMA_02G108400	GLYMA_03G192200	GLYMA_06G208200	GLYMA_03G247000	GLYMA_18G009300	GLYMA_13G062800	GLYMA_02G261800		GLYMA_11G139800
GLYMA_U038600	GLYMA_06G285700	GLYMA_02G269000	GLYMA_10G254500	GLYMA_03G261900	GLYMA_13G265500	GLYMA_02G283400	GLYMA_04G158400	GLYMA_18G165600	GLYMA_11G048400		GLYMA_U038600
GLYMA_11G176000	GLYMA_14G063300	GLYMA_06G018100	GLYMA_16G200800	GLYMA_16G050400	GLYMA_10G100800	GLYMA_11G174300	GLYMA_07G067300	GLYMA_10G269200	GLYMA_11G233800		GLYMA_11G176000
GLYMA_19G026900	GLYMA_06G235000	GLYMA_09G138300	GLYMA_10G059700	GLYMA_05G108600	GLYMA_10G185100	GLYMA_07G016300	GLYMA_09G173700	GLYMA_08G043800	GLYMA_08G118100		GLYMA_19G026900
GLYMA_11G076100	GLYMA_05G138100	GLYMA_18G038000	GLYMA_06G078300	GLYMA_08G180500	GLYMA_20G149500	GLYMA_03G184000	GLYMA_19G026900	GLYMA_05G007400	GLYMA_06G307000		GLYMA_11G076100
GLYMA_17G175400	GLYMA_13G042500	GLYMA_03G177300	GLYMA_20G150600	GLYMA_03G107600	GLYMA_17G001800	GLYMA_13G354900	GLYMA_10G028900	GLYMA_08G356800	GLYMA_03G133300		GLYMA_17G175400
GLYMA_07G266800	GLYMA_20G207200	GLYMA_05G169700	GLYMA_06G235000	GLYMA_01G106900	GLYMA_17G060100	GLYMA_06G211600	GLYMA_10G035700	GLYMA_05G137300	GLYMA_06G148500		GLYMA_07G266800
GLYMA_14G051900	GLYMA_15G213600	GLYMA_09G015900	ENSRNA050002612	GLYMA_02G128000	GLYMA_07G181700	GLYMA_10G065500	GLYMA_16G019500	GLYMA_11G045000	GLYMA_06G265500		GLYMA_14G051900
GLYMA_13G089100	GLYMA_02G118200	GLYMA_10G138500	GLYMA_08G024500	GLYMA_16G094100	GLYMA_11G213100	GLYMA_10G051100	GLYMA_02G227200	GLYMA_15G005000	GLYMA_10G117200		GLYMA_13G089100
GLYMA_19G033500	GLYMA_08G249900	GLYMA_02G218200	GLYMA_10G227700	GLYMA_14G176400	GLYMA_20G100500	GLYMA_08G312000	GLYMA_08G204900	GLYMA_09G243600	GLYMA_05G241900		GLYMA_19G033500
GLYMA_01G211000	GLYMA_09G178600	GLYMA_12G097200	GLYMA_13G339800	GLYMA_16G094400	GLYMA_15G055800	GLYMA_06G114200	GLYMA_09G083700	GLYMA_20G114900	GLYMA_04G123800		GLYMA_01G211000
GLYMA_11G100600	GLYMA_16G216800	GLYMA_20G051600	GLYMA_06G179200	GLYMA_08G176600	GLYMA_13G070300	GLYMA_17G048500	GLYMA_02G033400	GLYMA_11G036500	GLYMA_09G029600		GLYMA_11G100600
GLYMA_08G109500	GLYMA_15G236900	GLYMA_05G104800	GLYMA_15G213600	GLYMA_05G181500	GLYMA_15G050300	GLYMA_06G190100	GLYMA_04G045800	GLYMA_05G102800	GLYMA_11G247400		GLYMA_08G109500
GLYMA_14G216600	GLYMA_07G016300	GLYMA_18G004300	GLYMA_09G245400	GLYMA_18G271300	GLYMA_09G022400	GLYMA_02G013000	GLYMA_15G040100	GLYMA_12G122200	GLYMA_19G244300		GLYMA_14G216600
GLYMA_09G039500	GLYMA_02G226500	GLYMA_13G305400	GLYMA_14G047200	GLYMA_06G080900	GLYMA_17G106800	GLYMA_08G261100	GLYMA_13G262700	GLYMA_03G140700	GLYMA_18G037900		GLYMA_09G039500
GLYMA_19G213900	GLYMA_19G259600	GLYMA_02G100800	GLYMA_11G104100	GLYMA_12G187200	GLYMA_10G179400	GLYMA_02G176100	GLYMA_15G266100	GLYMA_03G193500	GLYMA_06G319500		GLYMA_19G213900
GLYMA_01G038600	GLYMA_07G208000	GLYMA_02G068800	GLYMA_08G148400	GLYMA_15G087100	GLYMA_02G266600	GLYMA_20G149100	GLYMA_02G136900	GLYMA_06G018100	GLYMA_06G039800		GLYMA_01G038600
GLYMA_10G079700	GLYMA_08G345100	GLYMA_09G216600	GLYMA_17G230000	GLYMA_13G214100	GLYMA_13G124700	GLYMA_02G034700	GLYMA_09G155700	GLYMA_15G181600	GLYMA_02G094500		GLYMA_10G079700
GLYMA_06G063700	GLYMA_19G251600	GLYMA_11G110900	GLYMA_10G122700	GLYMA_13G305100	GLYMA_08G306600	GLYMA_13G356000	GLYMA_04G084500	GLYMA_18G200500	GLYMA_08G132700		GLYMA_06G063700
GLYMA_10G117200	GLYMA_13G146400	GLYMA_12G120200	GLYMA_04G179400	GLYMA_03G246000	GLYMA_07G058100	GLYMA_15G116800	GLYMA_07G055000	GLYMA_05G208500	GLYMA_11G097100		GLYMA_10G117200
GLYMA_04G018400	GLYMA_20G244800	GLYMA_13G306600	GLYMA_10G222000	GLYMA_04G037800	GLYMA_13G089500	GLYMA_07G115800	GLYMA_10G163500	GLYMA_06G300900	GLYMA_18G036400		GLYMA_04G018400
GLYMA_14G053100	GLYMA_20G085900	GLYMA_07G215500	GLYMA_17G259700	GLYMA_05G161500	GLYMA_15G018100	GLYMA_01G079900	GLYMA_05G050400	GLYMA_04G200500	GLYMA_14G063300		GLYMA_14G053100
GLYMA_08G035000	GLYMA_19G087800	GLYMA_12G076700	GLYMA_13G054700	GLYMA_11G058200	GLYMA_09G111200	GLYMA_12G056700	GLYMA_12G037200	GLYMA_06G060600	GLYMA_20G241700		GLYMA_08G035000
GLYMA_05G037800	GLYMA_01G148900	GLYMA_19G112700	GLYMA_03G125000	GLYMA_16G074200	GLYMA_07G244200	GLYMA_11G104100	GLYMA_05G225300	GLYMA_13G110900	GLYMA_17G111100		GLYMA_05G037800
GLYMA_01G213800	GLYMA_15G114800	GLYMA_13G108300	GLYMA_07G226400	GLYMA_12G233500	GLYMA_06G157300	GLYMA_10G290300	GLYMA_02G195900	GLYMA_13G210600	GLYMA_17G127200		GLYMA_01G213800
ENSRNA050000528	GLYMA_19G014500	GLYMA_13G361300	GLYMA_U038700	GLYMA_06G299700	GLYMA_04G236200	GLYMA_04G179400	GLYMA_03G127200	GLYMA_05G161200	GLYMA_06G096600		ENSRNA050000528
GLYMA_11G044400	GLYMA_08G212900	GLYMA_02G051700	GLYMA_15G224500	GLYMA_17G009800	GLYMA_13G110800	GLYMA_18G141900	GLYMA_09G181200	GLYMA_04G184500	GLYMA_13G211000		GLYMA_11G044400
GLYMA_17G026000	GLYMA_10G036000	GLYMA_13G176000	GLYMA_U038600	GLYMA_12G052100	GLYMA_08G108900	GLYMA_19G076200	GLYMA_02G171300	GLYMA_05G025400	GLYMA_18G091300		GLYMA_17G026000
GLYMA_05G190300	GLYMA_02G172800	GLYMA_17G127200	GLYMA_16G083800	GLYMA_10G029600	GLYMA_17G008000	GLYMA_10G193200	GLYMA_19G028600	GLYMA_19G120700	GLYMA_08G174300		GLYMA_05G190300
GLYMA_13G339800	GLYMA_13G335600	GLYMA_03G258700	GLYMA_19G150900	GLYMA_18G260900	GLYMA_09G199100	GLYMA_20G150300	GLYMA_04G181500	GLYMA_18G038000	GLYMA_13G228900		GLYMA_13G339800
GLYMA_10G034800	GLYMA_04G132700	GLYMA_20G179700	GLYMA_16G139500	GLYMA_08G287400	GLYMA_U041200	GLYMA_11G208800	GLYMA_12G197900	GLYMA_10G286500	GLYMA_16G018500		GLYMA_10G034800
GLYMA_02G311900	GLYMA_14G214300	GLYMA_09G087100	GLYMA_11G037400	GLYMA_16G060400	GLYMA_14G017000	GLYMA_17G128400	GLYMA_05G156400	GLYMA_07G229600	GLYMA_09G269500		GLYMA_02G311900
GLYMA_04G188500	GLYMA_08G303100	GLYMA_16G173100	GLYMA_06G000600	GLYMA_05G094300	GLYMA_13G262200	GLYMA_07G049900	GLYMA_07G271200	GLYMA_08G325600	GLYMA_10G172900		GLYMA_04G188500
GLYMA_15G149000	GLYMA_06G211600	GLYMA_11G059200	GLYMA_13G281900	GLYMA_06G035300	GLYMA_06G206100	GLYMA_05G169000	GLYMA_01G150000	GLYMA_19G156000	GLYMA_12G193700		GLYMA_15G149000
GLYMA_13G265500	GLYMA_01G106500	GLYMA_11G112800	GLYMA_02G033400	GLYMA_07G021100	GLYMA_18G286800	GLYMA_07G115500	GLYMA_12G197600	GLYMA_02G017100	GLYMA_02G128800		GLYMA_13G265500
GLYMA_12G096700	GLYMA_14G047200	GLYMA_08G024400	GLYMA_09G001700	GLYMA_07G052800	GLYMA_10G051100	GLYMA_12G084000	GLYMA_14G086600	GLYMA_07G261800	GLYMA_03G236300		GLYMA_12G096700
GLYMA_05G211600	GLYMA_11G153800	GLYMA_02G283400	GLYMA_08G038200	GLYMA_13G222000	GLYMA_10G286500	GLYMA_05G068400	GLYMA_08G001200	GLYMA_18G263900	GLYMA_03G030400		GLYMA_05G211600
GLYMA_14G011700	GLYMA_11G101400	GLYMA_12G023800	GLYMA_14G067800	GLYMA_14G028200	GLYMA_07G254000	GLYMA_03G088900	GLYMA_06G169100	GLYMA_05G037800	GLYMA_07G237500		GLYMA_14G011700
GLYMA_04G215000	GLYMA_10G243800	GLYMA_11G174100	GLYMA_14G132100	GLYMA_11G223200	GLYMA_15G243000	GLYMA_01G009700	GLYMA_10G138800	GLYMA_08G137000	GLYMA_02G311900		GLYMA_04G215000
GLYMA_06G187100	GLYMA_18G232800	GLYMA_03G205000	GLYMA_17G084500	GLYMA_10G212100	GLYMA_06G210200	GLYMA_11G195000	GLYMA_07G132400	GLYMA_03G062500	GLYMA_04G190500		GLYMA_06G187100
GLYMA_06G307000	GLYMA_11G213100	GLYMA_19G205500	GLYMA_08G243100	GLYMA_12G006500	GLYMA_02G148300	GLYMA_12G216300	GLYMA_13G281600	GLYMA_05G123400	GLYMA_07G200800		GLYMA_06G307000
GLYMA_19G260000	GLYMA_03G056800	GLYMA_08G245000	GLYMA_08G070300	GLYMA_14G174600	GLYMA_11G059200	GLYMA_04G239400	GLYMA_13G305400	GLYMA_12G048400	GLYMA_10G229700		GLYMA_19G260000
GLYMA_16G175500	GLYMA_02G108600	GLYMA_14G110500	GLYMA_06G052000	GLYMA_10G245500	GLYMA_02G296800	GLYMA_12G215700	GLYMA_01G002400	GLYMA_13G108300	GLYMA_07G032300		GLYMA_16G175500
GLYMA_14G052100	GLYMA_07G215000	GLYMA_08G038200	GLYMA_13G108300	GLYMA_01G146800	GLYMA_04G187300	GLYMA_01G233800	GLYMA_07G210000	GLYMA_15G141000	GLYMA_06G296700		GLYMA_14G052100
GLYMA_04G037800	GLYMA_10G194000	GLYMA_11G048400	GLYMA_01G037500	GLYMA_04G206000	GLYMA_02G265700	GLYMA_18G177800	GLYMA_13G087100	GLYMA_19G133500	GLYMA_02G087400		GLYMA_04G037800
GLYMA_12G117000	GLYMA_02G042600	GLYMA_13G089500	GLYMA_05G145500	GLYMA_17G260400	GLYMA_10G277200	GLYMA_07G055000	GLYMA_06G030500	GLYMA_08G107400	GLYMA_18G195200		GLYMA_12G117000
GLYMA_04G150500	GLYMA_06G056000	ENSRNA050000765	GLYMA_13G149100	GLYMA_19G022800	GLYMA_10G058200	GLYMA_17G120700	GLYMA_08G263700	GLYMA_19G147400	GLYMA_13G331600		GLYMA_04G150500
GLYMA_09G043900	GLYMA_09G263200	GLYMA_06G142200	GLYMA_12G145900	GLYMA_15G159300	GLYMA_17G161300	GLYMA_10G113200	GLYMA_08G251900	GLYMA_10G100800	GLYMA_10G243800		GLYMA_09G043900
GLYMA_19G147000	GLYMA_15G018100	GLYMA_09G191800	GLYMA_18G210900	GLYMA_19G120000	GLYMA_02G297800	GLYMA_15G048100	GLYMA_02G308300	GLYMA_03G217300	GLYMA_13G257200		GLYMA_19G147000
GLYMA_01G048700	GLYMA_07G005100	GLYMA_14G073300	GLYMA_16G150300	GLYMA_03G103800	GLYMA_12G014400	GLYMA_03G140700	GLYMA_09G203000	GLYMA_08G024500	GLYMA_14G195200		GLYMA_01G048700
GLYMA_09G263200	GLYMA_13G037400	GLYMA_13G040400	GLYMA_10G021200	GLYMA_14G027800	GLYMA_12G197100	GLYMA_13G089100	GLYMA_18G062000	GLYMA_06G022800	GLYMA_07G058800		GLYMA_09G263200
GLYMA_07G020900	GLYMA_03G176600	GLYMA_01G001200	GLYMA_01G127400	GLYMA_13G231000	GLYMA_13G335600	GLYMA_06G017600	GLYMA_03G088900	GLYMA_14G015700	GLYMA_15G243000		GLYMA_07G020900
GLYMA_03G183100	GLYMA_06G199700	GLYMA_18G031800	GLYMA_20G164000	GLYMA_15G221600	GLYMA_11G209700	GLYMA_12G076700	GLYMA_20G179700	GLYMA_06G166800	GLYMA_17G138900		GLYMA_03G183100
GLYMA_06G082300	GLYMA_08G052100	GLYMA_20G035200	GLYMA_12G084000	GLYMA_08G229900	GLYMA_17G118300	GLYMA_06G134800	GLYMA_08G227200	GLYMA_19G185600	GLYMA_07G188100		GLYMA_06G082300
GLYMA_11G165700	GLYMA_18G295800	GLYMA_15G152500	GLYMA_08G091800	GLYMA_19G167600	GLYMA_18G125200	GLYMA_13G257000	GLYMA_10G268100	GLYMA_03G018800	GLYMA_12G237600		GLYMA_11G165700
GLYMA_20G085900	GLYMA_18G125200	GLYMA_14G031200	GLYMA_13G275300	GLYMA_13G063800	GLYMA_16G015300	GLYMA_06G067900	GLYMA_10G277200	GLYMA_09G116400	GLYMA_16G042000		GLYMA_20G085900
GLYMA_16G070300	GLYMA_15G011700	GLYMA_20G150600	GLYMA_19G234100	GLYMA_13G108300	GLYMA_12G205100	GLYMA_07G154500	GLYMA_08G038500	GLYMA_02G102600	GLYMA_17G214400		GLYMA_16G070300
GLYMA_U009100	GLYMA_18G271900	GLYMA_05G033400	GLYMA_12G184300	GLYMA_13G174400	GLYMA_10G138200	GLYMA_18G076600	GLYMA_08G329900	GLYMA_02G077200	GLYMA_03G225300		GLYMA_U009100
GLYMA_10G258300	GLYMA_20G100500	GLYMA_19G005800	GLYMA_20G152700	GLYMA_02G299800	GLYMA_03G225300	GLYMA_18G297200	GLYMA_02G152500	GLYMA_09G040300	GLYMA_14G051600		GLYMA_10G258300
GLYMA_02G063900	GLYMA_02G033200	GLYMA_06G035300	GLYMA_04G084500	GLYMA_20G193800	GLYMA_02G199500	GLYMA_12G224600	GLYMA_U041200	GLYMA_14G051900	GLYMA_08G308600		GLYMA_02G063900
GLYMA_02G224100	GLYMA_01G191600	GLYMA_20G150300	GLYMA_07G159700	GLYMA_02G286900	GLYMA_03G030300	GLYMA_20G112400	GLYMA_13G035600	GLYMA_08G020900	GLYMA_02G284300		GLYMA_02G224100
GLYMA_10G261100	GLYMA_02G077200	GLYMA_13G345900	GLYMA_12G187500	GLYMA_17G009900	GLYMA_01G134200	GLYMA_03G145800	GLYMA_10G060800	GLYMA_09G043400	GLYMA_04G038800		GLYMA_10G261100
GLYMA_09G269500	GLYMA_16G007700	GLYMA_06G171700	GLYMA_17G060100	GLYMA_14G085500	GLYMA_08G053000	GLYMA_01G058400	GLYMA_07G154400	GLYMA_08G295600	GLYMA_09G255100		GLYMA_09G269500
GLYMA_03G154200	GLYMA_19G038700	GLYMA_19G115600	GLYMA_12G169500	GLYMA_16G102400	GLYMA_09G152500	GLYMA_13G046300	GLYMA_11G247700	GLYMA_02G148200	GLYMA_12G097200		GLYMA_03G154200
GLYMA_09G273400	GLYMA_10G039500	GLYMA_10G248600	GLYMA_12G134200	GLYMA_08G201700	GLYMA_06G087100	GLYMA_03G186900	GLYMA_10G015500	GLYMA_19G249800	GLYMA_08G284800		GLYMA_09G273400
GLYMA_05G127600	GLYMA_03G196400	GLYMA_17G232500	GLYMA_08G306200	GLYMA_15G215600	GLYMA_08G241600	GLYMA_15G040200	GLYMA_13G343000	GLYMA_06G169100	GLYMA_16G173000		GLYMA_05G127600
GLYMA_03G198600	GLYMA_04G008400	GLYMA_20G017800	GLYMA_20G163200	GLYMA_14G067800	GLYMA_18G141700	GLYMA_18G018600	GLYMA_19G120700	GLYMA_03G207400	GLYMA_11G166500		GLYMA_03G198600
GLYMA_13G081400	GLYMA_08G241600	GLYMA_15G032600	GLYMA_06G238100	GLYMA_11G033900	GLYMA_13G145000	GLYMA_06G179900	GLYMA_19G219500	GLYMA_20G058900	GLYMA_15G267000		GLYMA_13G081400
GLYMA_02G100800	GLYMA_04G190600	GLYMA_05G156400	GLYMA_07G049900	GLYMA_13G122400	GLYMA_16G160400	GLYMA_20G248700	GLYMA_13G361300	GLYMA_05G044000	GLYMA_11G178200		GLYMA_02G100800
GLYMA_01G132600	GLYMA_18G224200	GLYMA_06G080900	GLYMA_07G229000	GLYMA_15G084800	GLYMA_01G030900	GLYMA_14G201200	GLYMA_16G021700	GLYMA_15G118900	GLYMA_20G193800		GLYMA_01G132600
GLYMA_04G070500	GLYMA_01G190000	GLYMA_09G167400	GLYMA_18G101700	GLYMA_17G086100	GLYMA_10G103000	ENSRNA050002131	GLYMA_07G110900	GLYMA_05G156400	GLYMA_08G213100		GLYMA_04G070500
GLYMA_07G010000	GLYMA_19G158400	GLYMA_15G011000	GLYMA_18G256900	GLYMA_04G205100	GLYMA_05G144100	GLYMA_06G171700	GLYMA_09G234900	GLYMA_18G278600	GLYMA_09G040500		GLYMA_07G010000
GLYMA_08G020900	GLYMA_19G212600	GLYMA_15G004100	GLYMA_02G118100	GLYMA_12G197900	GLYMA_01G158000	GLYMA_10G194000	GLYMA_13G079900	GLYMA_08G353500	GLYMA_17G015400		GLYMA_08G020900
GLYMA_20G133200	GLYMA_04G214900	GLYMA_08G227700	GLYMA_09G124000	GLYMA_06G124400	GLYMA_11G211100	GLYMA_15G100900	GLYMA_02G184700	GLYMA_07G058100	GLYMA_17G159000		GLYMA_20G133200
GLYMA_15G006200	GLYMA_01G167500	GLYMA_12G077800	GLYMA_07G172600	GLYMA_20G100500	GLYMA_19G250200	GLYMA_18G004300	GLYMA_09G126100	GLYMA_15G264100	GLYMA_13G333200		GLYMA_15G006200
ENSRNA050000401	GLYMA_20G241700	GLYMA_05G214300	GLYMA_11G059200	GLYMA_01G217400	GLYMA_01G034900	GLYMA_15G242200	GLYMA_15G051900	GLYMA_07G264100	GLYMA_04G115600		ENSRNA050000401
GLYMA_04G169400	GLYMA_12G081400	GLYMA_10G077800	GLYMA_14G210600	GLYMA_07G105000	GLYMA_11G251500	GLYMA_17G127300	GLYMA_04G222000	GLYMA_17G047200	GLYMA_13G062800		GLYMA_04G169400
GLYMA_03G156700	GLYMA_20G126700	GLYMA_12G206000	GLYMA_17G131200	GLYMA_06G014700	GLYMA_13G186400	GLYMA_09G069900	GLYMA_16G177600	GLYMA_12G023300	GLYMA_13G148700		GLYMA_03G156700
GLYMA_16G217700	GLYMA_10G139300	GLYMA_01G167500	GLYMA_13G281600	GLYMA_08G015300	GLYMA_18G247800	GLYMA_02G292800	GLYMA_09G134200	GLYMA_12G037200	GLYMA_20G057500		GLYMA_16G217700
GLYMA_15G273800	GLYMA_08G256900	GLYMA_10G291700	GLYMA_13G288500	GLYMA_06G211600	GLYMA_16G141500	GLYMA_06G317800	GLYMA_13G257000	GLYMA_06G122700	GLYMA_10G198500		GLYMA_15G273800
GLYMA_08G180400	GLYMA_10G237800	GLYMA_18G111600	GLYMA_04G075700	GLYMA_18G261800	GLYMA_05G218400	GLYMA_13G048100	GLYMA_02G278400	GLYMA_08G216800	GLYMA_19G022800		GLYMA_08G180400
GLYMA_07G139700	GLYMA_13G346700	GLYMA_17G043700	GLYMA_15G084500	GLYMA_20G238300	GLYMA_05G028700	GLYMA_03G117600	GLYMA_04G187600	GLYMA_07G021100	GLYMA_15G066200		GLYMA_07G139700
GLYMA_02G046800	GLYMA_06G088800	GLYMA_14G109200	GLYMA_09G152500	GLYMA_08G180900	GLYMA_U038300	GLYMA_19G215600	GLYMA_15G145000	GLYMA_10G151300	GLYMA_20G217400		GLYMA_02G046800
GLYMA_05G235800	GLYMA_06G133500	GLYMA_06G174600	GLYMA_13G151800	GLYMA_08G117100	GLYMA_13G211000	GLYMA_13G228900	GLYMA_15G122900	GLYMA_20G189600	GLYMA_19G070000		GLYMA_05G235800
GLYMA_15G188400	GLYMA_05G237300	GLYMA_10G051100	GLYMA_08G337100	GLYMA_11G140500	GLYMA_10G172600	GLYMA_18G049500	GLYMA_18G146900	GLYMA_02G038800	GLYMA_18G206000		GLYMA_15G188400
GLYMA_U044600	GLYMA_17G159000	GLYMA_02G237100	GLYMA_13G314200	GLYMA_04G254500	GLYMA_10G291700	GLYMA_07G192200	GLYMA_11G141700	GLYMA_10G196400	GLYMA_02G228300		GLYMA_U044600
GLYMA_13G277800	GLYMA_15G065400	GLYMA_06G143700	GLYMA_11G246800	GLYMA_15G077700	GLYMA_06G044500	GLYMA_03G252200	GLYMA_18G012200	GLYMA_02G007300	GLYMA_12G178900		GLYMA_13G277800
GLYMA_02G071700	GLYMA_17G251400	GLYMA_07G167000	GLYMA_03G044300	GLYMA_08G177200	GLYMA_13G333100	GLYMA_03G057100	GLYMA_18G181800	GLYMA_05G036000	GLYMA_02G309200		GLYMA_02G071700
GLYMA_16G113000	GLYMA_08G209800	GLYMA_04G055500	GLYMA_04G151200	GLYMA_03G209700	GLYMA_10G178400	GLYMA_05G228100	GLYMA_17G075300	GLYMA_10G194000	GLYMA_02G237500		GLYMA_16G113000
GLYMA_03G175100	GLYMA_02G240500	GLYMA_18G152800	GLYMA_03G252500	GLYMA_20G204800	GLYMA_02G218300	GLYMA_01G211000	GLYMA_05G225800	GLYMA_17G122400	GLYMA_13G199500		GLYMA_03G175100
GLYMA_08G176100	GLYMA_02G199500	GLYMA_03G186900	GLYMA_07G208000	GLYMA_10G118100	GLYMA_05G011600	GLYMA_03G206800	GLYMA_10G118100	GLYMA_16G173100	GLYMA_09G138300		GLYMA_08G176100
GLYMA_08G017700	GLYMA_16G045000	GLYMA_08G184200	GLYMA_11G071100	GLYMA_11G141700	GLYMA_16G094100	GLYMA_05G192700	GLYMA_18G260900	GLYMA_01G180400	GLYMA_01G040700		GLYMA_08G017700
GLYMA_08G295600	GLYMA_09G167400	GLYMA_16G123600	GLYMA_19G257900	GLYMA_06G067000	GLYMA_18G109600	GLYMA_18G109600	GLYMA_20G027000	GLYMA_20G197100	GLYMA_08G245000		GLYMA_08G295600
GLYMA_15G258400	GLYMA_06G160200	GLYMA_13G248200	GLYMA_18G065900	GLYMA_U001200	GLYMA_19G257900	GLYMA_11G033900	GLYMA_18G141900	GLYMA_09G156700	GLYMA_08G330700		GLYMA_15G258400
GLYMA_19G207000	GLYMA_11G031300	GLYMA_13G215400	GLYMA_09G225400	GLYMA_01G072800	GLYMA_17G173800	GLYMA_18G009800	GLYMA_06G143400	GLYMA_17G021400	GLYMA_18G034100		GLYMA_19G207000
GLYMA_01G134200	GLYMA_05G233300	GLYMA_06G086600	GLYMA_13G354400	GLYMA_07G206900	GLYMA_11G010500	GLYMA_03G227600	GLYMA_18G016900	GLYMA_06G104700	GLYMA_10G148700		GLYMA_01G134200
GLYMA_15G170400	GLYMA_03G130300	GLYMA_12G215700	GLYMA_02G227700	GLYMA_14G145700	GLYMA_13G035600	GLYMA_07G052800	GLYMA_13G138400	GLYMA_07G226400	GLYMA_05G003900		GLYMA_15G170400
GLYMA_20G131700	GLYMA_06G242000	GLYMA_09G028100	GLYMA_09G216900	GLYMA_13G131400	GLYMA_14G072500	GLYMA_07G213900	GLYMA_11G221000	GLYMA_07G056200	GLYMA_17G001800		GLYMA_20G131700
GLYMA_09G016400	GLYMA_07G240400	GLYMA_04G215600	GLYMA_17G111100	GLYMA_07G271200	GLYMA_10G034200	GLYMA_06G086400	GLYMA_20G097000	GLYMA_02G254900	GLYMA_01G001200		GLYMA_09G016400
GLYMA_09G040800	GLYMA_18G223100	GLYMA_05G119300	GLYMA_03G167400	GLYMA_06G043900	GLYMA_07G223400	GLYMA_03G074600	GLYMA_19G243500	GLYMA_10G103000	GLYMA_11G000500		GLYMA_09G040800
GLYMA_03G157300	GLYMA_05G050600	GLYMA_06G264800	GLYMA_04G160100	GLYMA_06G264800	GLYMA_10G227700	GLYMA_10G243800	GLYMA_17G110200	GLYMA_19G183800	GLYMA_13G276700		GLYMA_03G157300
GLYMA_05G036000	GLYMA_02G267800	GLYMA_04G013400	GLYMA_07G030500	GLYMA_14G122900	GLYMA_09G280900	GLYMA_08G360800	GLYMA_13G057400	GLYMA_20G214200	GLYMA_03G104700		GLYMA_05G036000
GLYMA_05G068400	GLYMA_10G003600	GLYMA_06G105200	GLYMA_20G215100	GLYMA_12G084000	GLYMA_06G082700	GLYMA_08G255200	GLYMA_05G056600	GLYMA_12G103800	GLYMA_01G115000		GLYMA_05G068400
GLYMA_15G252800	GLYMA_08G310600	GLYMA_02G200500	GLYMA_08G241600	GLYMA_02G093100	GLYMA_01G151300	GLYMA_13G276700	GLYMA_15G056000	GLYMA_17G110300	GLYMA_18G232800		GLYMA_15G252800
GLYMA_18G272300	GLYMA_20G149600	GLYMA_03G237600	GLYMA_06G317000	GLYMA_11G195000	GLYMA_15G135500	GLYMA_13G354400	GLYMA_13G233900	GLYMA_07G100400	GLYMA_11G179300		GLYMA_18G272300
GLYMA_03G179700	GLYMA_01G011300	GLYMA_13G245100	GLYMA_05G188600	GLYMA_02G010400	GLYMA_09G087300	GLYMA_19G260000	GLYMA_09G204100	GLYMA_03G056700	GLYMA_02G219800		GLYMA_03G179700
GLYMA_15G135500	GLYMA_07G196300	GLYMA_05G090800	GLYMA_18G029400	GLYMA_11G228300	GLYMA_07G056200	GLYMA_17G248300	GLYMA_06G119000	GLYMA_13G227900	GLYMA_13G028100		GLYMA_15G135500
GLYMA_06G171700	GLYMA_04G007100	GLYMA_13G278400	GLYMA_07G252900	GLYMA_02G289600	GLYMA_06G142300	GLYMA_13G264400	GLYMA_05G112700	GLYMA_15G063400	GLYMA_13G035100		GLYMA_06G171700
GLYMA_04G209200	GLYMA_11G029500	GLYMA_14G049700	GLYMA_05G098700	GLYMA_14G007900	GLYMA_13G186600	GLYMA_11G244200	GLYMA_07G115500	GLYMA_09G273400	GLYMA_08G017700		GLYMA_04G209200
GLYMA_05G103300	GLYMA_06G089300	GLYMA_02G108600	GLYMA_15G061700	GLYMA_15G079500	GLYMA_12G221000	GLYMA_06G102400	GLYMA_15G182700	GLYMA_06G080900	GLYMA_15G252800		GLYMA_05G103300
GLYMA_13G251100	GLYMA_10G017600	GLYMA_15G131000	GLYMA_07G180600	GLYMA_14G206500	GLYMA_18G146900	GLYMA_18G076200	GLYMA_03G078300	GLYMA_18G249100	GLYMA_03G068100		GLYMA_13G251100
GLYMA_19G192500	GLYMA_02G254900	GLYMA_03G140700	GLYMA_02G074400	GLYMA_15G145000	GLYMA_19G064200	GLYMA_20G241600	GLYMA_02G286600	GLYMA_14G033800	GLYMA_07G073400		GLYMA_19G192500
GLYMA_08G344400	GLYMA_08G128000	GLYMA_06G157800	GLYMA_15G077600	GLYMA_17G086500	GLYMA_20G232600	GLYMA_10G010800	GLYMA_08G200900	GLYMA_07G200800	GLYMA_05G169600		GLYMA_08G344400
GLYMA_09G171400	GLYMA_18G272300	GLYMA_02G045600	GLYMA_14G073300	GLYMA_17G103300	GLYMA_14G037100	GLYMA_14G072500	GLYMA_18G076200	GLYMA_16G094100	GLYMA_16G177600		GLYMA_09G171400
GLYMA_07G100400	GLYMA_16G141500	GLYMA_15G023500	GLYMA_09G255100	GLYMA_06G105100	GLYMA_17G138300	GLYMA_01G120400	GLYMA_15G221600	GLYMA_12G117700	GLYMA_13G160400		GLYMA_07G100400
GLYMA_20G088900	GLYMA_16G147400	GLYMA_11G036500	GLYMA_05G027500	GLYMA_16G172400	GLYMA_18G223100	GLYMA_05G102800	GLYMA_08G245000	GLYMA_11G100600	GLYMA_16G188700		GLYMA_20G088900
GLYMA_09G280200	GLYMA_04G147600	GLYMA_14G140900	GLYMA_07G244200	GLYMA_02G259200	GLYMA_11G113700	GLYMA_10G043700	GLYMA_20G059200	GLYMA_01G193700	GLYMA_17G104000		GLYMA_09G280200
GLYMA_20G126700	GLYMA_19G066700	GLYMA_18G128500	GLYMA_05G188700	GLYMA_03G057100	GLYMA_10G063000	GLYMA_11G059200	GLYMA_19G102700	GLYMA_17G152800	GLYMA_16G188900		GLYMA_20G126700
ENSRNA050000772	GLYMA_18G011500	GLYMA_08G070300	GLYMA_11G092600	GLYMA_05G050600	GLYMA_06G122700	GLYMA_17G141200	GLYMA_05G246500	GLYMA_11G084100	GLYMA_15G046900		ENSRNA050000772
GLYMA_13G081000	GLYMA_15G146400	GLYMA_12G195500	GLYMA_18G281500	GLYMA_05G245800	GLYMA_13G341500	GLYMA_13G199500	GLYMA_10G034200	GLYMA_13G306400	GLYMA_05G007400		GLYMA_13G081000
GLYMA_09G190300	GLYMA_14G015700	GLYMA_20G229000	GLYMA_16G021700	GLYMA_03G252200	GLYMA_12G178900	GLYMA_19G146900	GLYMA_08G357200	GLYMA_03G084300	GLYMA_11G085400		GLYMA_09G190300
GLYMA_01G025200	GLYMA_07G250400	GLYMA_09G087300	GLYMA_14G052500	GLYMA_03G129600	GLYMA_20G169500	GLYMA_13G248200	GLYMA_06G038900	GLYMA_18G284400	GLYMA_07G144100		GLYMA_01G025200
GLYMA_15G024600	GLYMA_14G049600	GLYMA_17G049800	GLYMA_15G201700	GLYMA_11G178200	GLYMA_07G167000	GLYMA_17G060100	GLYMA_06G190000	GLYMA_11G154700	GLYMA_04G239400		GLYMA_15G024600
GLYMA_18G072300	GLYMA_07G172600	GLYMA_03G157300	GLYMA_01G167500	GLYMA_08G079200	GLYMA_08G155100	GLYMA_14G170700	GLYMA_04G205300	GLYMA_08G358400	GLYMA_11G084100		GLYMA_18G072300
GLYMA_11G077200	GLYMA_16G019500	GLYMA_15G021200	GLYMA_04G190600	GLYMA_02G062700	GLYMA_07G101600	GLYMA_13G110800	GLYMA_12G039200	GLYMA_11G244200	GLYMA_05G129700		GLYMA_11G077200
GLYMA_02G227200	GLYMA_10G096300	GLYMA_01G208000	GLYMA_07G227300	GLYMA_01G009700	GLYMA_17G114300	GLYMA_13G285800	GLYMA_12G192900	GLYMA_02G089100	GLYMA_03G211900		GLYMA_02G227200
GLYMA_08G175300	GLYMA_05G034000	GLYMA_10G044700	GLYMA_13G089100	GLYMA_02G152500	GLYMA_16G210300	GLYMA_01G167500	GLYMA_13G174400	GLYMA_09G156200	GLYMA_10G178400		GLYMA_08G175300
GLYMA_18G016900	GLYMA_08G212300	GLYMA_02G214300	GLYMA_08G295600	GLYMA_17G008800	GLYMA_17G037500	GLYMA_10G015900	GLYMA_05G214900	GLYMA_18G132600	GLYMA_11G027400		GLYMA_18G016900
GLYMA_13G051900	GLYMA_05G163400	GLYMA_13G099500	GLYMA_03G217500	GLYMA_07G079600	GLYMA_11G247600	GLYMA_02G077200	GLYMA_06G218900	GLYMA_14G053100	GLYMA_08G261000		GLYMA_13G051900
GLYMA_01G030300	GLYMA_08G176100	GLYMA_05G050200	GLYMA_10G202400	GLYMA_11G225400	GLYMA_06G160200	GLYMA_14G053100	GLYMA_02G110900	GLYMA_02G074500	GLYMA_10G035700		GLYMA_01G030300
GLYMA_09G200800	GLYMA_08G210200	GLYMA_07G055000	GLYMA_10G172900	GLYMA_07G087700	GLYMA_01G233900	GLYMA_11G048700	GLYMA_07G207000	GLYMA_13G353800	GLYMA_18G180900		GLYMA_09G200800
GLYMA_04G223200	GLYMA_11G087800	GLYMA_06G004500	GLYMA_07G210000	GLYMA_10G053000	GLYMA_06G104700	GLYMA_10G100800	GLYMA_20G159200	GLYMA_02G051700	GLYMA_07G048900		GLYMA_04G223200
GLYMA_13G067400	GLYMA_10G155800	GLYMA_07G151600	GLYMA_02G233200	GLYMA_02G087000	GLYMA_15G101600	GLYMA_07G207400	GLYMA_08G342000	GLYMA_08G261000	GLYMA_05G189500		GLYMA_13G067400
GLYMA_04G187300	GLYMA_10G002700	GLYMA_02G267800	GLYMA_05G145700	GLYMA_09G194800	GLYMA_02G038800	GLYMA_03G041000	GLYMA_15G234700	GLYMA_20G100500	GLYMA_04G103400		GLYMA_04G187300
GLYMA_02G148200	GLYMA_17G107300	GLYMA_14G169300	GLYMA_11G014500	GLYMA_03G006200	GLYMA_02G106300	GLYMA_15G019300	GLYMA_04G179600	GLYMA_15G248300	GLYMA_01G152200		GLYMA_02G148200
GLYMA_15G069700	GLYMA_17G115300	GLYMA_01G081900	GLYMA_07G120300	GLYMA_18G258700	GLYMA_02G228600	GLYMA_07G260100	GLYMA_16G047600	GLYMA_19G178100	GLYMA_16G169700		GLYMA_15G069700
GLYMA_19G198000	GLYMA_17G019200	GLYMA_04G028600	GLYMA_05G232300	GLYMA_02G184700	GLYMA_18G158700	GLYMA_16G102400	GLYMA_09G216900	GLYMA_09G178200	GLYMA_13G262700		GLYMA_19G198000
GLYMA_11G247700	GLYMA_06G031900	GLYMA_15G019300	GLYMA_03G157800	GLYMA_12G072900	GLYMA_06G316700	GLYMA_07G202300	GLYMA_14G080900	GLYMA_01G109500	GLYMA_08G025000		GLYMA_11G247700
GLYMA_11G071600	GLYMA_02G045300	GLYMA_10G065600	GLYMA_14G038800	GLYMA_01G115500	GLYMA_14G194900	GLYMA_03G246800	GLYMA_18G285100	GLYMA_11G235200	GLYMA_19G188900		GLYMA_11G071600
GLYMA_15G270000	GLYMA_13G081000	GLYMA_16G172400	GLYMA_03G148100	GLYMA_11G228000	GLYMA_18G116900	GLYMA_06G307000	GLYMA_09G229200	GLYMA_14G038800	GLYMA_11G232600		GLYMA_15G270000
GLYMA_15G224500	GLYMA_08G113900	GLYMA_13G025800	GLYMA_08G108200	GLYMA_07G129900	GLYMA_10G251400	GLYMA_11G254700	GLYMA_07G005100	GLYMA_14G150100	GLYMA_15G100900		GLYMA_15G224500
GLYMA_09G127900	GLYMA_03G240700	GLYMA_02G097000	GLYMA_15G276300	GLYMA_11G106000	GLYMA_09G216900	GLYMA_09G204100	GLYMA_12G056700	GLYMA_16G123600	GLYMA_04G187600		GLYMA_09G127900
GLYMA_03G197900	GLYMA_14G162000	GLYMA_08G147900	GLYMA_01G011300	GLYMA_08G072700	GLYMA_18G228100	GLYMA_20G112200	GLYMA_09G040800	GLYMA_18G002600	GLYMA_16G016700		GLYMA_03G197900
GLYMA_03G250200	GLYMA_06G042900	GLYMA_13G112000	GLYMA_16G047600	GLYMA_13G208700	GLYMA_09G040800	GLYMA_01G147600	GLYMA_17G049500	GLYMA_19G119200	GLYMA_08G074700		GLYMA_03G250200
GLYMA_08G039400	GLYMA_02G106300	GLYMA_03G165200	GLYMA_10G270700	GLYMA_15G266100	GLYMA_02G171100	GLYMA_13G305100	GLYMA_06G122700	GLYMA_13G208000	GLYMA_07G010000		GLYMA_08G039400
GLYMA_02G075800	GLYMA_10G212100	GLYMA_16G047600	GLYMA_06G017400	GLYMA_02G025100	GLYMA_18G068600	GLYMA_11G029500	GLYMA_02G257000	GLYMA_09G111200	GLYMA_12G097100		GLYMA_02G075800
GLYMA_06G138600	GLYMA_09G038200	GLYMA_03G116000	GLYMA_06G088800	GLYMA_12G062700	GLYMA_10G145200	GLYMA_20G210900	GLYMA_02G007000	GLYMA_15G063000	GLYMA_13G048100		GLYMA_06G138600
GLYMA_15G063000	GLYMA_07G174600	GLYMA_10G241600	GLYMA_02G143300	GLYMA_14G052000	GLYMA_19G147900	GLYMA_15G100100	GLYMA_19G156700	GLYMA_01G175300	GLYMA_12G233500		GLYMA_15G063000
GLYMA_02G109700	GLYMA_05G112700	GLYMA_11G044400	GLYMA_05G068400	GLYMA_02G299300	GLYMA_01G052300	GLYMA_19G022500	GLYMA_02G006600	GLYMA_18G175300	GLYMA_16G021700		GLYMA_02G109700
GLYMA_03G205800	GLYMA_06G318400	GLYMA_04G196100	GLYMA_03G107600	GLYMA_07G177600	GLYMA_04G103500	GLYMA_19G133500	GLYMA_13G006500	GLYMA_17G231900	GLYMA_02G259800		GLYMA_03G205800
GLYMA_13G316800	GLYMA_18G073600	GLYMA_08G165700	GLYMA_19G004400	GLYMA_06G021100	GLYMA_17G047200	GLYMA_04G041400	GLYMA_08G268000	GLYMA_15G135500	GLYMA_14G024500		GLYMA_13G316800
GLYMA_17G110200	GLYMA_13G132900	GLYMA_11G059500	GLYMA_06G125200	GLYMA_12G219700	GLYMA_08G001200	GLYMA_14G177700	GLYMA_17G138500	GLYMA_05G108600	GLYMA_06G125200		GLYMA_17G110200
GLYMA_04G175900	GLYMA_05G129600	GLYMA_13G285800	GLYMA_11G153800	GLYMA_11G192600	GLYMA_13G251100	GLYMA_18G259900	GLYMA_14G069400	GLYMA_05G098700	GLYMA_05G086400		GLYMA_04G175900
GLYMA_17G027300	GLYMA_09G156700	GLYMA_18G202900	GLYMA_09G111200	GLYMA_05G008300	GLYMA_13G316500	GLYMA_16G123600	GLYMA_02G108800	GLYMA_05G159200	GLYMA_06G264000		GLYMA_17G027300
GLYMA_01G218500	GLYMA_19G222600	GLYMA_02G299200	GLYMA_13G256500	GLYMA_14G067000	GLYMA_06G052000	GLYMA_06G210200	GLYMA_01G058400	GLYMA_08G017000	GLYMA_05G208500		GLYMA_01G218500
GLYMA_06G025300	GLYMA_04G094200	GLYMA_12G240000	GLYMA_18G116400	GLYMA_16G121900	GLYMA_16G147400	GLYMA_01G143800	GLYMA_11G067500	GLYMA_18G154200	GLYMA_14G211500		GLYMA_06G025300
GLYMA_13G365800	GLYMA_13G276700	GLYMA_07G010000	GLYMA_14G211500	GLYMA_06G039800	GLYMA_11G212400	GLYMA_01G148700	GLYMA_15G181800	GLYMA_04G038800	GLYMA_13G281600		GLYMA_13G365800
GLYMA_04G045800	GLYMA_14G195100	GLYMA_03G114300	GLYMA_01G179400	GLYMA_04G019200	GLYMA_08G147700	GLYMA_09G216600	GLYMA_14G127800	GLYMA_03G144800	GLYMA_12G040400		GLYMA_04G045800
GLYMA_01G095600	GLYMA_10G029700	GLYMA_16G217700	GLYMA_03G225500	GLYMA_05G050400	GLYMA_07G229600	GLYMA_15G170400	GLYMA_02G102600	GLYMA_13G042500	GLYMA_12G032800		GLYMA_01G095600
GLYMA_10G283500	GLYMA_17G029900	GLYMA_07G021100	GLYMA_10G213200	GLYMA_06G013600	GLYMA_16G092700	GLYMA_07G021100	GLYMA_04G244300	GLYMA_01G026200	GLYMA_14G029900		GLYMA_10G283500
GLYMA_06G122600	GLYMA_04G150600	GLYMA_07G019800	GLYMA_08G212900	GLYMA_15G024300	GLYMA_05G070200	GLYMA_18G067800	GLYMA_06G018100	GLYMA_12G148200	GLYMA_04G223100		GLYMA_06G122600
GLYMA_01G018800	GLYMA_15G084600	GLYMA_10G274700	GLYMA_02G254900	GLYMA_15G024600	GLYMA_09G020300	GLYMA_13G147000	GLYMA_07G206000	GLYMA_08G257800	GLYMA_17G034900		GLYMA_01G018800
GLYMA_17G127300	GLYMA_12G206700	GLYMA_08G208000	GLYMA_13G153400	GLYMA_17G094500	GLYMA_11G050800	GLYMA_07G202200	GLYMA_15G058800	GLYMA_06G223300	GLYMA_01G010500		GLYMA_17G127300
GLYMA_13G362800	GLYMA_05G076400	GLYMA_08G227200	GLYMA_16G084300	GLYMA_11G216700	GLYMA_18G239900	GLYMA_15G130900	GLYMA_15G170400	GLYMA_17G106800	GLYMA_06G064900		GLYMA_13G362800
GLYMA_15G030100	GLYMA_05G090600	GLYMA_02G309300	GLYMA_02G259200	GLYMA_13G089500	GLYMA_01G048700	GLYMA_02G045600	GLYMA_18G139900	GLYMA_16G175400	GLYMA_15G068400		GLYMA_15G030100
GLYMA_16G147400	GLYMA_15G124500	GLYMA_14G216600	GLYMA_13G304400	GLYMA_16G221500	GLYMA_17G046000	GLYMA_04G223600	GLYMA_02G010400	GLYMA_08G251500	GLYMA_05G023500		GLYMA_16G147400
GLYMA_03G252500	GLYMA_06G235500	GLYMA_06G249800	GLYMA_05G056300	GLYMA_06G056000	GLYMA_19G188900	GLYMA_08G333800	GLYMA_05G011600	GLYMA_17G030100	GLYMA_04G022100		GLYMA_03G252500
GLYMA_08G261000	GLYMA_20G097000	GLYMA_11G251800	GLYMA_16G207700	GLYMA_06G004400	GLYMA_14G101400	GLYMA_11G083800	GLYMA_08G043800	GLYMA_07G101600	GLYMA_01G076900		GLYMA_08G261000
GLYMA_11G097100	GLYMA_06G041500	GLYMA_04G151000	GLYMA_16G010500	GLYMA_10G196400	GLYMA_18G206000	GLYMA_13G233900	GLYMA_02G301800	GLYMA_10G041800	GLYMA_13G215400		GLYMA_11G097100
GLYMA_16G153600	GLYMA_18G028900	GLYMA_07G192200	GLYMA_03G201700	GLYMA_02G228800	GLYMA_19G112700	GLYMA_11G177800	GLYMA_20G083800	GLYMA_01G024800	GLYMA_04G222000		GLYMA_16G153600
GLYMA_09G134200	GLYMA_02G240400	GLYMA_08G324700	GLYMA_07G025600	GLYMA_02G042600	GLYMA_04G184500	GLYMA_01G106900	GLYMA_10G050400	GLYMA_04G062000	GLYMA_06G319300		GLYMA_09G134200
GLYMA_05G098700	GLYMA_15G154900	GLYMA_13G204300	GLYMA_20G151800	GLYMA_16G145200	GLYMA_16G173100	GLYMA_08G024500	GLYMA_15G068400	GLYMA_03G252500	GLYMA_15G164800		GLYMA_05G098700
GLYMA_08G360800	GLYMA_19G204900	GLYMA_13G156300	GLYMA_09G167400	GLYMA_02G175500	GLYMA_03G077200	GLYMA_17G173100	GLYMA_06G296700	GLYMA_01G157100	GLYMA_10G277200		GLYMA_08G360800
GLYMA_03G201000	GLYMA_04G005200	GLYMA_08G295600	GLYMA_02G118400	GLYMA_06G163200	GLYMA_11G233800	GLYMA_18G146900	GLYMA_18G271900	GLYMA_10G172200	GLYMA_06G160200		GLYMA_03G201000
GLYMA_12G234800	GLYMA_20G137000	GLYMA_04G179400	GLYMA_05G011600	GLYMA_06G297400	GLYMA_02G259100	GLYMA_06G169100	GLYMA_20G205400	GLYMA_14G023800	GLYMA_07G240200		GLYMA_12G234800
GLYMA_02G309300	GLYMA_20G187600	GLYMA_U029700	GLYMA_08G152800	GLYMA_04G178500	GLYMA_06G249800	GLYMA_13G163900	GLYMA_15G271000	GLYMA_14G091500	GLYMA_18G018600		GLYMA_02G309300
GLYMA_02G228300	GLYMA_13G059500	GLYMA_04G004800	GLYMA_17G154300	GLYMA_06G302300	GLYMA_12G037200	GLYMA_03G198600	GLYMA_14G083500	GLYMA_19G187000	GLYMA_06G043900		GLYMA_02G228300
GLYMA_12G037200	GLYMA_20G030200	GLYMA_10G212100	GLYMA_09G221300	GLYMA_06G316700	GLYMA_03G154200	GLYMA_14G031200	GLYMA_13G248200	GLYMA_09G087200	GLYMA_13G059900		GLYMA_12G037200
GLYMA_05G246500	GLYMA_18G130800	GLYMA_01G103500	GLYMA_09G071300	GLYMA_04G100400	GLYMA_08G279700	GLYMA_14G132500	GLYMA_04G038800	GLYMA_15G061800	GLYMA_04G191100		GLYMA_05G246500
GLYMA_13G311600	GLYMA_05G151400	GLYMA_15G048100	GLYMA_01G207300	GLYMA_13G247600	GLYMA_06G081800	GLYMA_07G034100	GLYMA_09G046100	GLYMA_10G015900	GLYMA_10G291700		GLYMA_13G311600
GLYMA_18G190200	GLYMA_18G258700	GLYMA_08G339000	GLYMA_15G126100	GLYMA_04G018400	GLYMA_10G173100	GLYMA_04G207200	GLYMA_14G119700	GLYMA_10G138800	GLYMA_13G088300		GLYMA_18G190200
GLYMA_12G209900	GLYMA_08G206300	GLYMA_18G181800	GLYMA_11G035100	GLYMA_18G002600	GLYMA_15G006200	GLYMA_02G046800	GLYMA_20G149500	GLYMA_17G060100	GLYMA_06G264700		GLYMA_12G209900
GLYMA_16G049500	GLYMA_10G261100	GLYMA_07G141600	GLYMA_04G169600	GLYMA_03G108000	GLYMA_07G059600	GLYMA_05G190800	GLYMA_05G162600	GLYMA_01G221400	GLYMA_19G033500		GLYMA_16G049500
GLYMA_17G218900	GLYMA_19G141400	GLYMA_05G137300	GLYMA_12G011400	GLYMA_01G168500	GLYMA_15G242200	GLYMA_04G200700	GLYMA_14G031200	GLYMA_03G250200	GLYMA_07G101600		GLYMA_17G218900
GLYMA_04G240600	GLYMA_01G036000	GLYMA_06G042900	GLYMA_15G161200	GLYMA_16G201900	GLYMA_15G124500	GLYMA_12G081400	GLYMA_01G038600	GLYMA_07G141600	GLYMA_01G218500		GLYMA_04G240600
GLYMA_14G049700	GLYMA_16G139500	GLYMA_13G333900	GLYMA_05G197100	GLYMA_13G250900	GLYMA_06G141400	GLYMA_13G063800	GLYMA_08G261100	GLYMA_18G158400	GLYMA_14G007900		GLYMA_14G049700
GLYMA_13G281900	GLYMA_02G308300	GLYMA_14G150600	GLYMA_01G197300	GLYMA_12G187000	GLYMA_17G089300	GLYMA_04G187300	GLYMA_08G356800	GLYMA_08G320700	GLYMA_11G165700		GLYMA_13G281900
GLYMA_19G178000	GLYMA_09G044100	GLYMA_04G070500	GLYMA_18G233900	GLYMA_07G246500	GLYMA_04G004600	GLYMA_19G192900	GLYMA_04G216100	GLYMA_13G266000	GLYMA_03G071700		GLYMA_19G178000
GLYMA_20G176100	GLYMA_11G075100	GLYMA_16G145000	GLYMA_01G168200	GLYMA_19G243500	GLYMA_16G007700	GLYMA_01G091900	GLYMA_04G137600	GLYMA_08G261100	GLYMA_10G069500		GLYMA_20G176100
GLYMA_10G060700	GLYMA_08G066800	GLYMA_15G118500	GLYMA_06G193800	GLYMA_04G205000	GLYMA_20G153300	GLYMA_15G122900	GLYMA_01G030900	GLYMA_15G019800	GLYMA_05G159200		GLYMA_10G060700
GLYMA_02G026300	GLYMA_10G007500	GLYMA_02G137900	GLYMA_08G105700	GLYMA_04G047900	GLYMA_17G042900	GLYMA_20G187600	GLYMA_19G156000	GLYMA_12G185600	GLYMA_12G132200		GLYMA_02G026300
GLYMA_18G146900	GLYMA_18G206000	GLYMA_10G172900	GLYMA_06G031900	GLYMA_15G224500	GLYMA_03G237600	GLYMA_09G045900	GLYMA_14G176300	GLYMA_02G120300	GLYMA_06G171700		GLYMA_18G146900
GLYMA_03G152500	GLYMA_08G130500	GLYMA_12G237600	GLYMA_06G157200	GLYMA_06G179900	GLYMA_03G030400	GLYMA_03G171100	GLYMA_06G039800	GLYMA_17G060600	GLYMA_20G203000		GLYMA_03G152500
GLYMA_20G059200	GLYMA_07G030500	GLYMA_19G076200	GLYMA_02G278200	GLYMA_20G176100	GLYMA_13G002800	GLYMA_13G057400	GLYMA_02G283400	GLYMA_14G205000	GLYMA_07G268800		GLYMA_20G059200
GLYMA_08G114400	GLYMA_08G332900	GLYMA_19G224500	GLYMA_15G181800	GLYMA_17G127200	GLYMA_10G252500	GLYMA_02G109700	GLYMA_02G259300	GLYMA_10G213200	GLYMA_04G121000		GLYMA_08G114400
GLYMA_03G152800	GLYMA_06G125200	GLYMA_14G203600	GLYMA_17G073200	GLYMA_18G018400	GLYMA_08G354700	GLYMA_19G204900	GLYMA_07G020400	GLYMA_18G076600	GLYMA_08G053000		GLYMA_03G152800
GLYMA_20G100500	GLYMA_05G130500	GLYMA_07G147100	GLYMA_17G098700	GLYMA_03G177300	GLYMA_09G103000	GLYMA_05G118300	GLYMA_10G100800	GLYMA_02G285100	GLYMA_02G136900		GLYMA_20G100500
GLYMA_11G174100	GLYMA_04G024600	GLYMA_10G029000	GLYMA_05G175000	GLYMA_17G220900	GLYMA_01G097100	GLYMA_08G114400	GLYMA_17G012300	GLYMA_18G152800	GLYMA_18G273200		GLYMA_11G174100
GLYMA_14G078000	GLYMA_13G177000	GLYMA_20G130400	GLYMA_14G101400	GLYMA_14G194200	GLYMA_03G006900	GLYMA_10G227700	GLYMA_04G087500	GLYMA_07G121900	GLYMA_06G049500		GLYMA_14G078000
GLYMA_10G063100	GLYMA_01G135500	GLYMA_16G018500	GLYMA_14G201200	GLYMA_05G169700	GLYMA_14G045200	GLYMA_05G050200	GLYMA_03G205000	GLYMA_13G311600	GLYMA_09G028100		GLYMA_10G063100
GLYMA_08G241600	GLYMA_18G031400	GLYMA_13G339800	GLYMA_13G362200	GLYMA_05G011600	GLYMA_06G218900	GLYMA_12G065400	GLYMA_19G213900	GLYMA_15G020800	GLYMA_15G145700		GLYMA_08G241600
GLYMA_13G131400	GLYMA_09G056600	GLYMA_09G194800	GLYMA_04G130100	GLYMA_19G213500	GLYMA_13G082300	GLYMA_06G136800	GLYMA_02G224100	GLYMA_07G254600	GLYMA_18G263900		GLYMA_13G131400
GLYMA_03G249000	GLYMA_18G138000	GLYMA_07G056200	GLYMA_16G094600	GLYMA_18G211800	GLYMA_16G011900	GLYMA_02G199500	GLYMA_13G354900	GLYMA_18G016900	GLYMA_05G020600		GLYMA_03G249000
GLYMA_10G241600	GLYMA_07G141900	GLYMA_10G067200	GLYMA_01G056000	GLYMA_15G182700	GLYMA_08G287500	GLYMA_04G004200	GLYMA_14G216600	GLYMA_17G080700	GLYMA_10G051100		GLYMA_10G241600
GLYMA_16G217000	GLYMA_14G207500	GLYMA_03G017500	GLYMA_01G106100	GLYMA_18G009500	GLYMA_11G022300	GLYMA_08G109500	GLYMA_13G040400	GLYMA_09G167900	GLYMA_16G123600		GLYMA_16G217000
GLYMA_08G021900	GLYMA_08G053600	GLYMA_11G104100	GLYMA_02G140100	GLYMA_08G314900	GLYMA_07G174600	GLYMA_10G116600	GLYMA_15G024600	GLYMA_03G005600	GLYMA_07G238400		GLYMA_08G021900
GLYMA_14G147800	GLYMA_03G137400	GLYMA_10G039500	GLYMA_03G154200	GLYMA_06G125700	GLYMA_18G062000	GLYMA_03G152800	GLYMA_12G072900	GLYMA_05G166900	GLYMA_08G184200		GLYMA_14G147800
GLYMA_14G015700	GLYMA_16G102400	GLYMA_03G217300	GLYMA_12G225600	GLYMA_02G282900	GLYMA_01G193700	GLYMA_04G244300	GLYMA_13G046600	GLYMA_03G041000	GLYMA_15G135500		GLYMA_14G015700
GLYMA_16G094400	GLYMA_11G014500	GLYMA_01G038600	GLYMA_06G319300	GLYMA_18G067800	GLYMA_01G109500	GLYMA_14G011100	GLYMA_16G045000	GLYMA_10G136300	GLYMA_14G069300		GLYMA_16G094400
GLYMA_18G018600	GLYMA_03G029800	GLYMA_17G047200	GLYMA_13G057000	GLYMA_11G113700	GLYMA_20G236900	GLYMA_06G004500	GLYMA_07G242900	GLYMA_20G159200	GLYMA_15G117000		GLYMA_18G018600
GLYMA_17G073200	GLYMA_02G129300	GLYMA_13G233700	GLYMA_19G247400	GLYMA_06G005000	GLYMA_04G062000	GLYMA_20G149600	GLYMA_03G150100	GLYMA_13G300400	GLYMA_01G052300		GLYMA_17G073200
GLYMA_10G145200	GLYMA_03G017500	GLYMA_04G216200	GLYMA_02G265700	GLYMA_12G054800	GLYMA_18G245700	GLYMA_09G134100	GLYMA_11G195000	GLYMA_14G101400	GLYMA_03G249000		GLYMA_10G145200
GLYMA_19G005900	GLYMA_10G091800	GLYMA_07G238800	GLYMA_04G238300	GLYMA_06G061700	GLYMA_10G161000	GLYMA_05G108600	GLYMA_11G075100	GLYMA_15G145000	GLYMA_03G141900		GLYMA_19G005900
GLYMA_06G126100	GLYMA_02G145700	GLYMA_11G071600	GLYMA_08G224800	GLYMA_17G021400	GLYMA_13G030900	GLYMA_15G056000	GLYMA_07G021100	GLYMA_13G285800	GLYMA_17G031500		GLYMA_06G126100
GLYMA_14G132100	GLYMA_07G207000	GLYMA_U038600	GLYMA_13G122400	GLYMA_01G106100	GLYMA_14G186600	GLYMA_09G222200	GLYMA_02G254900	GLYMA_03G260600	GLYMA_05G165700		GLYMA_14G132100
GLYMA_09G156700	GLYMA_10G185100	GLYMA_06G060600	GLYMA_05G166900	GLYMA_08G198900	GLYMA_06G125100	GLYMA_14G206900	GLYMA_19G236900	GLYMA_16G105100	GLYMA_06G137000		GLYMA_09G156700
GLYMA_08G324700	GLYMA_09G116400	GLYMA_18G009500	GLYMA_05G236400	GLYMA_13G285800	GLYMA_11G195000	GLYMA_01G007800	GLYMA_08G360800	GLYMA_13G087800	GLYMA_05G150500		GLYMA_08G324700
GLYMA_19G029800	GLYMA_18G158400	GLYMA_14G194300	GLYMA_12G164000	GLYMA_07G016300	GLYMA_11G215600	GLYMA_06G113400	GLYMA_03G186900	GLYMA_18G158700	GLYMA_15G161500		GLYMA_19G029800
GLYMA_15G117000	GLYMA_01G170000	GLYMA_10G261600	GLYMA_13G227300	GLYMA_01G232400	GLYMA_20G064100	GLYMA_18G064400	GLYMA_06G166100	GLYMA_09G152500	GLYMA_10G281000		GLYMA_15G117000
GLYMA_05G214300	GLYMA_01G212300	GLYMA_11G254700	GLYMA_07G219600	GLYMA_19G161300	GLYMA_19G147400	GLYMA_20G145300	GLYMA_04G006300	GLYMA_17G084500	GLYMA_12G018300		GLYMA_05G214300
GLYMA_U008800	GLYMA_11G251100	GLYMA_05G233300	GLYMA_20G007800	GLYMA_13G288500	GLYMA_05G025400	GLYMA_07G148600	GLYMA_05G190800	GLYMA_08G281600	GLYMA_11G154700		GLYMA_U008800
GLYMA_07G165700	GLYMA_01G025000	GLYMA_04G019200	GLYMA_02G138200	GLYMA_08G017000	GLYMA_18G200500	GLYMA_11G087800	GLYMA_19G216100	GLYMA_08G176100	GLYMA_18G287900		GLYMA_07G165700
GLYMA_01G200500	GLYMA_11G104100	GLYMA_17G138300	GLYMA_08G114400	GLYMA_13G059700	GLYMA_07G056100	GLYMA_05G033400	GLYMA_06G005000	GLYMA_05G011600	GLYMA_13G312500		GLYMA_01G200500
GLYMA_19G204900	GLYMA_19G016200	GLYMA_06G039800	GLYMA_16G170300	GLYMA_09G029600	GLYMA_19G148700	GLYMA_08G325600	GLYMA_13G150000	GLYMA_06G218900	GLYMA_15G240700		GLYMA_19G204900
GLYMA_02G285300	GLYMA_07G171400	GLYMA_01G025000	GLYMA_08G342000	GLYMA_04G177800	GLYMA_15G145000	GLYMA_09G001700	GLYMA_10G174100	GLYMA_08G208000	GLYMA_18G287800		GLYMA_02G285300
ENSRNA050003021	GLYMA_01G205500	GLYMA_18G150800	GLYMA_08G004600	GLYMA_02G244700	GLYMA_18G282200	GLYMA_05G214300	GLYMA_11G234000	GLYMA_02G106300	GLYMA_16G218700		ENSRNA050003021
GLYMA_10G053900	GLYMA_09G004400	GLYMA_08G360800	GLYMA_18G277600	GLYMA_13G306900	GLYMA_02G285100	GLYMA_14G007900	GLYMA_16G061400	GLYMA_08G289300	GLYMA_11G087800		GLYMA_10G053900
GLYMA_17G042400	GLYMA_09G217700	GLYMA_07G172600	GLYMA_05G110200	GLYMA_01G029900	GLYMA_05G230700	GLYMA_02G074400	GLYMA_03G030300	GLYMA_08G070300	GLYMA_10G103000		GLYMA_17G042400
GLYMA_01G212300	GLYMA_11G251500	GLYMA_08G251500	GLYMA_12G148200	GLYMA_01G186500	GLYMA_18G035900	GLYMA_04G190500	GLYMA_17G042800	GLYMA_12G080700	GLYMA_04G098800		GLYMA_01G212300
GLYMA_06G177400	GLYMA_14G047500	GLYMA_17G241400	GLYMA_12G048800	GLYMA_18G031800	GLYMA_13G311600	GLYMA_04G252600	GLYMA_18G103500	GLYMA_13G081400	GLYMA_18G189800		GLYMA_06G177400
GLYMA_15G100900	GLYMA_10G161400	GLYMA_02G219800	GLYMA_14G181500	GLYMA_02G097000	GLYMA_08G164200	GLYMA_08G181000	GLYMA_08G089800	GLYMA_18G146900	GLYMA_17G049500		GLYMA_15G100900
GLYMA_06G030500	GLYMA_15G071400	GLYMA_13G333100	GLYMA_11G228000	GLYMA_04G004100	GLYMA_13G213800	GLYMA_18G258700	GLYMA_09G138300	GLYMA_04G150500	GLYMA_04G220700		GLYMA_06G030500
GLYMA_13G042500	GLYMA_20G150300	GLYMA_07G005100	GLYMA_15G143300	GLYMA_06G042900	GLYMA_19G210300	GLYMA_17G138300	GLYMA_10G192800	GLYMA_02G218300	GLYMA_07G233000		GLYMA_13G042500
GLYMA_09G173700	GLYMA_12G056700	GLYMA_10G208800	GLYMA_10G237800	GLYMA_04G045800	GLYMA_17G084500	GLYMA_08G220800	GLYMA_08G189800	GLYMA_04G075700	GLYMA_15G061800		GLYMA_09G173700
GLYMA_16G021700	GLYMA_16G151900	GLYMA_08G131000	GLYMA_01G224400	GLYMA_01G124100	GLYMA_08G176600	GLYMA_19G079100	GLYMA_08G290600	GLYMA_03G128900	GLYMA_08G039400		GLYMA_16G021700
GLYMA_07G020400	GLYMA_02G238600	GLYMA_08G209800	GLYMA_06G290300	GLYMA_10G152400	GLYMA_18G210600	GLYMA_03G082900	GLYMA_10G043700	GLYMA_20G248900	GLYMA_08G337100		GLYMA_07G020400
GLYMA_14G128500	GLYMA_03G193300	GLYMA_17G009800	GLYMA_12G221000	GLYMA_14G206900	GLYMA_13G247300	GLYMA_16G221500	GLYMA_14G148800	GLYMA_14G051000	GLYMA_09G201900		GLYMA_14G128500
GLYMA_09G280800	GLYMA_07G229600	GLYMA_02G120300	GLYMA_08G120700	GLYMA_13G087800	GLYMA_13G353100	GLYMA_02G108800	GLYMA_20G243000	GLYMA_10G113200	GLYMA_12G057900		GLYMA_09G280800
GLYMA_13G344200	GLYMA_07G079600	GLYMA_06G297400	GLYMA_13G031100	GLYMA_05G236400	GLYMA_12G103800	GLYMA_12G195500	GLYMA_15G100100	GLYMA_09G126500	GLYMA_05G064500		GLYMA_13G344200
GLYMA_07G110900	GLYMA_06G169100	GLYMA_14G003700	GLYMA_03G156700	GLYMA_20G236100	GLYMA_10G002200	GLYMA_04G205300	GLYMA_20G149600	GLYMA_18G262600	GLYMA_05G118300		GLYMA_07G110900
GLYMA_06G210200	GLYMA_02G030500	GLYMA_17G014000	GLYMA_12G081400	GLYMA_17G210500	GLYMA_17G043700	GLYMA_06G125200	GLYMA_12G035700	GLYMA_12G225700	GLYMA_06G124300		GLYMA_06G210200
GLYMA_07G000500	GLYMA_13G153400	GLYMA_04G035700	GLYMA_14G092900	GLYMA_16G178800	GLYMA_06G007500	GLYMA_19G119200	GLYMA_01G167500	GLYMA_13G333100	GLYMA_13G248700		GLYMA_07G000500
GLYMA_13G298100	GLYMA_07G229000	GLYMA_17G011300	GLYMA_06G060600	GLYMA_06G160200	GLYMA_19G143300	GLYMA_08G308000	GLYMA_10G116600	GLYMA_15G068400	GLYMA_06G262400		GLYMA_13G298100
GLYMA_05G164200	GLYMA_17G098100	GLYMA_15G114800	GLYMA_12G192800	GLYMA_16G131800	GLYMA_02G074400	GLYMA_11G247700	GLYMA_18G004300	GLYMA_09G004400	GLYMA_18G260700		GLYMA_05G164200
GLYMA_10G249600	GLYMA_02G006600	GLYMA_20G154400	GLYMA_10G129500	GLYMA_08G053600	GLYMA_07G172600	GLYMA_09G261400	GLYMA_19G050800	GLYMA_03G249200	GLYMA_18G186800		GLYMA_10G249600
GLYMA_08G000800	GLYMA_19G179800	GLYMA_01G002400	GLYMA_12G037200	GLYMA_07G054000	GLYMA_18G175300	GLYMA_05G164200	GLYMA_08G091800	GLYMA_19G026900	GLYMA_20G097100		GLYMA_08G000800
GLYMA_19G034900	GLYMA_13G369000	GLYMA_06G324100	GLYMA_06G044500	GLYMA_14G185300	GLYMA_10G116600	GLYMA_09G087100	GLYMA_20G244800	GLYMA_04G097900	GLYMA_13G253100		GLYMA_19G034900
GLYMA_01G035000	GLYMA_07G244000	GLYMA_04G250900	GLYMA_08G136600	GLYMA_09G040400	GLYMA_14G132100	GLYMA_06G069900	GLYMA_13G304400	GLYMA_20G017100	GLYMA_19G032100		GLYMA_01G035000
GLYMA_14G051000	GLYMA_07G241600	GLYMA_07G235900	GLYMA_01G004600	GLYMA_11G166500	GLYMA_11G122200	GLYMA_14G179200	GLYMA_08G249900	GLYMA_16G160500	GLYMA_13G241200		GLYMA_14G051000
GLYMA_15G118900	GLYMA_04G226800	GLYMA_04G068400	GLYMA_11G139900	GLYMA_18G212500	GLYMA_13G175400	GLYMA_06G285700	GLYMA_08G068900	GLYMA_06G210200	GLYMA_15G087100		GLYMA_15G118900
GLYMA_U041200	GLYMA_12G239600	GLYMA_01G143800	GLYMA_08G212400	GLYMA_08G102300	GLYMA_13G316000	GLYMA_10G139300	GLYMA_12G195500	GLYMA_14G083600	GLYMA_20G205300		GLYMA_U041200
GLYMA_06G142300	GLYMA_10G138800	GLYMA_13G186600	GLYMA_08G071100	GLYMA_07G054700	GLYMA_11G048200	GLYMA_07G244400	GLYMA_U038600	GLYMA_13G041200	GLYMA_19G235200		GLYMA_06G142300
GLYMA_06G160200	GLYMA_06G182200	GLYMA_08G202300	GLYMA_12G055200	GLYMA_U027700	GLYMA_15G079300	GLYMA_09G059800	GLYMA_18G282100	GLYMA_01G213800	GLYMA_13G046700		GLYMA_06G160200
GLYMA_20G135500	GLYMA_08G161600	GLYMA_19G011000	GLYMA_01G097100	GLYMA_10G194000	GLYMA_15G019800	GLYMA_20G232600	GLYMA_06G019800	GLYMA_12G205100	GLYMA_19G187400		GLYMA_20G135500
GLYMA_06G104700	GLYMA_05G044100	GLYMA_07G200200	GLYMA_12G116700	GLYMA_17G224500	GLYMA_04G253900	GLYMA_07G265400	GLYMA_05G179300	GLYMA_06G141400	GLYMA_03G172000		GLYMA_06G104700
GLYMA_04G216100	GLYMA_08G120700	GLYMA_09G216900	GLYMA_11G130400	GLYMA_07G067300	GLYMA_17G113100	GLYMA_17G047200	GLYMA_17G058400	GLYMA_20G210900	GLYMA_07G248000		GLYMA_04G216100
GLYMA_09G087300	GLYMA_06G025300	GLYMA_13G233400	GLYMA_06G105500	GLYMA_16G158100	GLYMA_02G123000	GLYMA_06G028700	GLYMA_01G079900	GLYMA_17G058400	GLYMA_06G242100		GLYMA_09G087300
GLYMA_17G049500	GLYMA_05G244900	GLYMA_11G208800	GLYMA_16G161100	ENSRNA050000545	GLYMA_02G087400	GLYMA_18G205800	GLYMA_13G233700	GLYMA_08G330700	GLYMA_17G186000		GLYMA_17G049500
GLYMA_18G091900	GLYMA_18G062000	GLYMA_05G008500	GLYMA_04G104600	GLYMA_10G059400	GLYMA_07G212700	GLYMA_08G117100	GLYMA_13G264400	GLYMA_02G093400	GLYMA_09G040300		GLYMA_18G091900
GLYMA_20G107600	GLYMA_14G078000	GLYMA_09G001700	GLYMA_19G175200	GLYMA_20G179700	GLYMA_17G146500	GLYMA_05G129600	GLYMA_03G207400	GLYMA_19G035800	GLYMA_02G228200		GLYMA_20G107600
GLYMA_09G187700	GLYMA_08G015300	GLYMA_04G238600	GLYMA_06G025300	GLYMA_02G108600	GLYMA_01G185600	GLYMA_18G281000	GLYMA_01G208000	GLYMA_20G112200	GLYMA_18G141500		GLYMA_09G187700
GLYMA_14G004800	GLYMA_07G181700	GLYMA_13G042500	GLYMA_10G124200	GLYMA_04G041400	GLYMA_13G089100	GLYMA_10G261600	GLYMA_09G138100	GLYMA_20G229000	GLYMA_07G222700		GLYMA_14G004800
GLYMA_11G214300	GLYMA_04G097800	GLYMA_13G182300	GLYMA_09G221800	GLYMA_01G048700	GLYMA_07G029800	GLYMA_11G251100	GLYMA_10G252500	GLYMA_08G158800	GLYMA_13G156300		GLYMA_11G214300
GLYMA_13G280500	GLYMA_01G103500	GLYMA_10G245500	GLYMA_06G091900	GLYMA_19G147000	GLYMA_10G206300	GLYMA_13G323700	GLYMA_09G278800	GLYMA_17G253500	GLYMA_04G149300		GLYMA_13G280500
GLYMA_06G126300	GLYMA_19G104600	GLYMA_10G251400	GLYMA_11G048200	GLYMA_17G138500	GLYMA_02G294000	GLYMA_01G109500	GLYMA_02G163200	GLYMA_11G034000	GLYMA_10G290300		GLYMA_06G126300
GLYMA_02G309000	GLYMA_15G083600	GLYMA_11G225400	GLYMA_06G042700	GLYMA_05G169600	GLYMA_07G246500	GLYMA_05G034000	GLYMA_03G130300	GLYMA_09G087100	GLYMA_15G141000		GLYMA_02G309000
GLYMA_02G118300	GLYMA_15G097700	GLYMA_08G148400	GLYMA_14G045200	GLYMA_14G048300	GLYMA_02G089100	GLYMA_06G190000	GLYMA_08G325600	GLYMA_14G128500	GLYMA_19G028600		GLYMA_02G118300
GLYMA_09G035300	GLYMA_02G039900	GLYMA_20G135700	GLYMA_14G072500	GLYMA_04G165900	GLYMA_06G128500	GLYMA_02G182400	GLYMA_11G071100	GLYMA_03G181800	GLYMA_11G207500		GLYMA_09G035300
GLYMA_11G092900	GLYMA_20G193000	GLYMA_20G197100	GLYMA_05G072600	GLYMA_02G024100	GLYMA_01G063700	GLYMA_03G157300	GLYMA_10G034900	GLYMA_11G251100	GLYMA_17G132200		GLYMA_11G092900
GLYMA_02G008700	GLYMA_11G192600	GLYMA_07G142800	GLYMA_05G090600	GLYMA_05G037800	GLYMA_12G240000	GLYMA_18G121400	GLYMA_12G240000	GLYMA_14G211500	GLYMA_09G010600		GLYMA_02G008700
GLYMA_16G217400	GLYMA_11G069600	GLYMA_20G059200	GLYMA_13G214600	GLYMA_02G235900	GLYMA_16G169700	GLYMA_04G062000	GLYMA_02G309300	GLYMA_19G000900	GLYMA_06G035200		GLYMA_16G217400
GLYMA_15G040100	GLYMA_08G345900	GLYMA_02G254900	GLYMA_09G087300	GLYMA_11G048400	GLYMA_01G095700	GLYMA_20G135500	GLYMA_06G081800	GLYMA_11G031500	GLYMA_10G060700		GLYMA_15G040100
GLYMA_11G166900	GLYMA_08G179900	GLYMA_02G018900	GLYMA_10G173500	GLYMA_03G193500	GLYMA_20G097000	GLYMA_19G005800	GLYMA_19G022800	GLYMA_19G141200	GLYMA_18G225100		GLYMA_11G166900
GLYMA_08G177200	GLYMA_14G053400	GLYMA_07G139700	GLYMA_10G261600	GLYMA_04G181500	GLYMA_10G239700	GLYMA_16G175400	GLYMA_04G062000	GLYMA_05G070200	GLYMA_09G256100		GLYMA_08G177200
GLYMA_08G131300	GLYMA_13G368700	GLYMA_08G117100	GLYMA_12G002000	GLYMA_20G015900	GLYMA_14G140900	GLYMA_20G197100	GLYMA_15G030100	GLYMA_13G227300	GLYMA_17G017200		GLYMA_08G131300
GLYMA_13G215400	GLYMA_16G011900	GLYMA_07G265400	GLYMA_07G215000	GLYMA_08G224800	GLYMA_10G139400	GLYMA_U038600	GLYMA_18G103200	GLYMA_11G037900	GLYMA_20G186200		GLYMA_13G215400
GLYMA_02G034700	GLYMA_05G043600	GLYMA_20G149600	GLYMA_13G208700	GLYMA_18G076600	GLYMA_07G226400	GLYMA_11G213100	GLYMA_14G185300	GLYMA_13G325900	GLYMA_20G179700		GLYMA_02G034700
GLYMA_13G248200	GLYMA_02G182400	GLYMA_18G059300	GLYMA_14G045000	GLYMA_09G182500	GLYMA_14G003600	GLYMA_09G070000	GLYMA_04G133700	GLYMA_03G179100	GLYMA_12G059100		GLYMA_13G248200
GLYMA_12G122200	GLYMA_01G200500	GLYMA_19G215600	GLYMA_20G232600	GLYMA_01G002400	GLYMA_07G227700	GLYMA_18G238000	GLYMA_10G196400	GLYMA_06G084700	GLYMA_10G136300		GLYMA_12G122200
GLYMA_08G312000	GLYMA_16G038300	GLYMA_20G005300	GLYMA_04G194400	GLYMA_08G136600	GLYMA_04G222000	GLYMA_18G107300	GLYMA_19G150900	GLYMA_20G244800	GLYMA_01G083100		GLYMA_08G312000
GLYMA_19G051100	GLYMA_16G107700	GLYMA_09G045900	GLYMA_16G160500	GLYMA_18G272300	GLYMA_18G090900	GLYMA_18G258000	GLYMA_13G097100	GLYMA_09G216900	GLYMA_03G051100		GLYMA_19G051100
GLYMA_07G271200	GLYMA_05G068100	GLYMA_02G102600	GLYMA_08G032900	GLYMA_07G083200	GLYMA_03G107600	GLYMA_09G020100	GLYMA_04G188900	GLYMA_07G025300	GLYMA_09G189500		GLYMA_07G271200
GLYMA_04G199300	GLYMA_17G247400	GLYMA_03G143100	GLYMA_02G220900	GLYMA_05G190300	GLYMA_01G091800	GLYMA_13G156400	GLYMA_10G223700	GLYMA_04G197100	GLYMA_19G036300		GLYMA_04G199300
GLYMA_15G116800	GLYMA_17G172900	GLYMA_14G207800	GLYMA_15G019800	GLYMA_16G150300	GLYMA_01G221400	GLYMA_20G059200	GLYMA_03G246000	GLYMA_07G048500	GLYMA_01G195600		GLYMA_15G116800
GLYMA_10G124200	GLYMA_11G176000	GLYMA_08G014600	GLYMA_09G181300	GLYMA_19G119200	GLYMA_19G033500	GLYMA_04G104500	GLYMA_19G104600	GLYMA_18G272300	GLYMA_02G123000		GLYMA_10G124200
GLYMA_03G144800	GLYMA_19G215600	GLYMA_04G022500	GLYMA_02G083600	GLYMA_04G025300	GLYMA_15G024300	GLYMA_08G314900	GLYMA_06G165100	GLYMA_13G293700	GLYMA_10G261000		GLYMA_03G144800
GLYMA_10G003600	GLYMA_12G200900	GLYMA_03G207400	GLYMA_16G045000	GLYMA_15G013200	GLYMA_12G211400	GLYMA_20G138000	GLYMA_19G156400	GLYMA_01G170200	GLYMA_20G232600		GLYMA_10G003600
GLYMA_09G225400	GLYMA_13G341500	GLYMA_18G133500	GLYMA_08G153700	GLYMA_08G345900	GLYMA_03G120200	GLYMA_13G062800	GLYMA_15G224500	GLYMA_14G009000	GLYMA_11G253900		GLYMA_09G225400
GLYMA_05G148500	GLYMA_06G023900	GLYMA_08G144400	GLYMA_05G056000	GLYMA_05G119300	GLYMA_09G129900	GLYMA_02G236500	GLYMA_14G011700	GLYMA_18G003800	GLYMA_11G068700		GLYMA_05G148500
GLYMA_10G138700	GLYMA_20G232100	GLYMA_18G210600	GLYMA_03G225400	GLYMA_18G272200	GLYMA_01G167500	GLYMA_04G005300	GLYMA_06G004500	GLYMA_19G064200	GLYMA_03G137000		GLYMA_10G138700
GLYMA_02G137900	GLYMA_20G064100	GLYMA_15G069700	GLYMA_08G089800	GLYMA_14G069400	GLYMA_03G018800	GLYMA_U029700	GLYMA_19G250000	GLYMA_15G018100	GLYMA_15G002300		GLYMA_02G137900
GLYMA_18G210600	GLYMA_11G037400	GLYMA_02G241800	GLYMA_19G221000	GLYMA_08G000800	GLYMA_16G170300	GLYMA_05G056600	GLYMA_05G085000	GLYMA_02G075800	GLYMA_09G087300		GLYMA_18G210600
GLYMA_05G169000	GLYMA_03G152500	GLYMA_16G201000	GLYMA_19G054600	GLYMA_18G018600	GLYMA_10G076100	GLYMA_03G178100	GLYMA_05G007300	GLYMA_11G023200	GLYMA_12G179700		GLYMA_05G169000
GLYMA_13G176300	GLYMA_04G058900	GLYMA_18G045300	GLYMA_02G017100	GLYMA_18G041300	GLYMA_18G256900	GLYMA_18G271900	GLYMA_05G190300	GLYMA_11G251800	GLYMA_08G241600		GLYMA_13G176300
GLYMA_04G004100	GLYMA_20G067400	GLYMA_12G073700	GLYMA_14G086300	GLYMA_05G138800	GLYMA_19G105100	GLYMA_13G005800	GLYMA_13G233600	GLYMA_05G228400	GLYMA_15G048100		GLYMA_04G004100
GLYMA_14G031200	GLYMA_09G280700	GLYMA_01G026200	GLYMA_14G224000	GLYMA_08G220800	GLYMA_17G223800	GLYMA_17G063200	GLYMA_06G177400	GLYMA_13G256400	GLYMA_07G212700		GLYMA_14G031200
GLYMA_18G040900	GLYMA_10G286800	GLYMA_04G187300	GLYMA_17G262300	GLYMA_11G211100	GLYMA_18G186800	GLYMA_10G108400	GLYMA_16G131800	GLYMA_13G177400	GLYMA_16G008500		GLYMA_18G040900
GLYMA_11G254700	GLYMA_19G011000	GLYMA_08G114400	GLYMA_10G036000	GLYMA_16G045000	GLYMA_03G081700	GLYMA_09G191800	GLYMA_10G066100	GLYMA_05G110200	GLYMA_03G232500		GLYMA_11G254700
GLYMA_08G105300	GLYMA_11G059500	GLYMA_14G200800	ENSRNA050003393	GLYMA_09G238800	GLYMA_06G271600	GLYMA_13G162900	GLYMA_19G204900	GLYMA_01G103500	GLYMA_08G210200		GLYMA_08G105300
GLYMA_02G171300	GLYMA_07G020400	GLYMA_10G015500	GLYMA_02G065000	GLYMA_14G042600	GLYMA_09G032100	GLYMA_08G020900	GLYMA_02G227900	GLYMA_03G088900	GLYMA_10G079700		GLYMA_02G171300
GLYMA_12G204600	GLYMA_17G098700	GLYMA_11G251500	GLYMA_20G077300	GLYMA_17G180400	GLYMA_13G326500	GLYMA_14G053500	GLYMA_09G237700	GLYMA_02G238600	GLYMA_14G156300		GLYMA_12G204600
GLYMA_03G071700	GLYMA_06G080900	GLYMA_11G025700	GLYMA_03G129300	GLYMA_07G116700	GLYMA_19G186100	GLYMA_12G145900	GLYMA_13G285800	GLYMA_11G232600	GLYMA_13G350500		GLYMA_03G071700
GLYMA_19G235200	GLYMA_19G119200	GLYMA_05G245800	GLYMA_15G099800	GLYMA_02G126100	GLYMA_07G057600	GLYMA_11G059500	GLYMA_13G341500	GLYMA_19G147900	GLYMA_10G288400		GLYMA_19G235200
GLYMA_01G103500	GLYMA_10G152000	GLYMA_19G111000	GLYMA_05G138800	GLYMA_07G270900	GLYMA_07G088300	GLYMA_13G343000	GLYMA_02G013000	GLYMA_12G098900	GLYMA_13G033400		GLYMA_01G103500
GLYMA_18G152800	GLYMA_02G233200	GLYMA_05G171500	GLYMA_17G063400	GLYMA_07G020900	GLYMA_05G130200	GLYMA_18G165600	GLYMA_09G001700	GLYMA_13G187000	GLYMA_11G034000		GLYMA_18G152800
GLYMA_01G106900	GLYMA_15G084500	GLYMA_13G059900	GLYMA_12G197100	GLYMA_11G071100	GLYMA_03G205000	GLYMA_09G138100	GLYMA_04G035700	GLYMA_13G089500	GLYMA_09G280200		GLYMA_01G106900
GLYMA_20G163000	GLYMA_02G272500	GLYMA_10G249600	GLYMA_06G113400	GLYMA_18G073600	GLYMA_19G035800	GLYMA_14G147800	GLYMA_01G233900	GLYMA_09G263200	GLYMA_09G273800		GLYMA_20G163000
GLYMA_05G056300	GLYMA_09G216900	GLYMA_15G256000	GLYMA_18G135000	GLYMA_13G318600	GLYMA_12G225700	GLYMA_05G011600	GLYMA_08G020900	GLYMA_02G176100	GLYMA_18G289600		GLYMA_05G056300
GLYMA_18G011500	GLYMA_04G103500	GLYMA_U025400	GLYMA_13G368700	GLYMA_06G114500	GLYMA_14G221500	GLYMA_04G205000	GLYMA_09G043400	GLYMA_15G114800	GLYMA_06G030500		GLYMA_18G011500
GLYMA_11G025700	GLYMA_14G193400	GLYMA_14G185300	GLYMA_05G181500	GLYMA_17G232600	GLYMA_18G031800	GLYMA_17G021400	GLYMA_07G049100	GLYMA_08G315000	GLYMA_04G168300		GLYMA_11G025700
GLYMA_01G058400	GLYMA_01G152600	GLYMA_11G174300	ENSRNA050002131	GLYMA_15G104600	GLYMA_18G156100	GLYMA_10G185100	GLYMA_08G128900	GLYMA_17G008800	GLYMA_01G099000		GLYMA_01G058400
GLYMA_13G262700	GLYMA_10G162800	GLYMA_05G181500	GLYMA_05G070600	GLYMA_17G155600	GLYMA_13G208000	GLYMA_10G124200	GLYMA_03G202400	GLYMA_02G228300	GLYMA_02G292800		GLYMA_13G262700
GLYMA_19G035800	GLYMA_05G050200	GLYMA_05G038700	GLYMA_04G022500	GLYMA_06G169100	GLYMA_09G182500	GLYMA_07G135100	GLYMA_08G088300	GLYMA_18G177800	GLYMA_03G188500		GLYMA_19G035800
GLYMA_06G122700	GLYMA_20G062900	GLYMA_09G238800	GLYMA_20G130200	GLYMA_10G060800	GLYMA_02G040200	GLYMA_20G119200	GLYMA_12G097200	GLYMA_08G083300	GLYMA_07G100400		GLYMA_06G122700
GLYMA_02G130700	GLYMA_04G074500	GLYMA_13G108500	GLYMA_13G262400	GLYMA_20G097100	GLYMA_05G118300	GLYMA_17G009900	GLYMA_05G104800	GLYMA_14G132100	GLYMA_13G089200		GLYMA_02G130700
GLYMA_01G127400	GLYMA_20G183600	GLYMA_17G118300	GLYMA_03G175000	GLYMA_14G082100	GLYMA_06G056000	GLYMA_09G050900	GLYMA_13G353100	GLYMA_02G034200	GLYMA_17G093600		GLYMA_01G127400
GLYMA_06G035300	GLYMA_13G097900	GLYMA_10G052300	GLYMA_04G175900	GLYMA_06G063700	GLYMA_16G014100	GLYMA_09G269500	GLYMA_04G070500	GLYMA_09G070000	GLYMA_06G224900		GLYMA_06G035300
GLYMA_07G192200	GLYMA_04G209200	GLYMA_03G250200	GLYMA_01G125800	GLYMA_03G250200	GLYMA_04G203100	GLYMA_13G122400	GLYMA_09G039500	GLYMA_07G033200	GLYMA_08G320700		GLYMA_07G192200
GLYMA_11G048200	GLYMA_04G062000	GLYMA_06G302300	GLYMA_02G134500	GLYMA_05G173700	GLYMA_03G181800	GLYMA_03G062500	GLYMA_08G345900	GLYMA_19G148700	GLYMA_13G225000		GLYMA_11G048200
ENSRNA050002251	GLYMA_13G316000	GLYMA_10G058900	GLYMA_19G148700	GLYMA_16G100800	GLYMA_13G067400	GLYMA_18G284400	GLYMA_08G113900	GLYMA_11G025700	GLYMA_13G355600		ENSRNA050002251
GLYMA_17G179100	GLYMA_10G155200	GLYMA_06G084700	GLYMA_05G138400	GLYMA_18G222200	GLYMA_09G116400	GLYMA_04G181500	GLYMA_09G178200	GLYMA_15G122900	GLYMA_10G231900		GLYMA_17G179100
GLYMA_15G022000	GLYMA_14G150900	GLYMA_13G163900	GLYMA_02G089500	GLYMA_08G159900	GLYMA_19G011000	GLYMA_10G138700	GLYMA_18G222900	GLYMA_01G127400	GLYMA_08G202300		GLYMA_15G022000
GLYMA_19G094200	GLYMA_16G094600	GLYMA_04G065800	GLYMA_03G188500	GLYMA_16G038300	GLYMA_01G003000	GLYMA_20G085900	GLYMA_11G216000	GLYMA_14G176400	GLYMA_09G004400		GLYMA_19G094200
GLYMA_08G074700	GLYMA_14G003600	GLYMA_U030300	GLYMA_11G068100	GLYMA_19G005800	GLYMA_13G140000	GLYMA_16G218700	GLYMA_10G258300	GLYMA_19G057300	GLYMA_14G042700		GLYMA_08G074700
GLYMA_20G074700	GLYMA_17G261000	GLYMA_01G052300	GLYMA_20G241700	GLYMA_08G268000	GLYMA_13G040400	GLYMA_04G250900	GLYMA_13G189800	GLYMA_04G252000	GLYMA_08G344300		GLYMA_20G074700
GLYMA_13G110900	GLYMA_07G109600	GLYMA_02G034700	GLYMA_04G202300	GLYMA_12G121000	GLYMA_11G246800	GLYMA_02G102600	GLYMA_03G101000	GLYMA_11G251500	GLYMA_15G025400		GLYMA_13G110900
GLYMA_08G073300	GLYMA_02G228600	GLYMA_17G050900	ENSRNA050030576	GLYMA_06G086400	GLYMA_20G017100	GLYMA_20G154400	GLYMA_10G061300	GLYMA_17G014000	GLYMA_17G108300		GLYMA_08G073300
GLYMA_18G274200	GLYMA_13G199300	GLYMA_14G078000	GLYMA_19G147900	GLYMA_09G048200	GLYMA_11G045000	GLYMA_07G048100	GLYMA_02G068800	GLYMA_17G011300	GLYMA_13G311600		GLYMA_18G274200
GLYMA_09G255100	GLYMA_12G192800	GLYMA_05G123400	GLYMA_06G309100	GLYMA_04G190300	GLYMA_18G158400	GLYMA_10G261100	GLYMA_09G194800	GLYMA_20G162000	GLYMA_04G165800		GLYMA_09G255100
GLYMA_12G232800	GLYMA_02G143300	GLYMA_13G199300	GLYMA_13G356000	GLYMA_14G036400	GLYMA_15G084500	GLYMA_13G199300	GLYMA_04G190300	GLYMA_15G055600	GLYMA_03G253200		GLYMA_12G232800
GLYMA_10G021700	GLYMA_11G184900	GLYMA_05G042400	GLYMA_11G084500	GLYMA_01G127400	GLYMA_20G007800	GLYMA_12G200900	GLYMA_12G095100	GLYMA_17G076000	GLYMA_07G049900		GLYMA_10G021700
GLYMA_15G128300	GLYMA_05G129300	GLYMA_06G074400	GLYMA_17G099800	GLYMA_20G227700	GLYMA_13G161500	GLYMA_10G059400	GLYMA_18G002600	GLYMA_01G002400	GLYMA_17G220900		GLYMA_15G128300
GLYMA_17G017200	GLYMA_07G032300	GLYMA_04G200500	GLYMA_13G030900	GLYMA_15G162800	GLYMA_08G175300	GLYMA_06G077500	GLYMA_09G045900	GLYMA_02G200700	GLYMA_15G150100		GLYMA_17G017200
GLYMA_20G120500	GLYMA_05G169700	GLYMA_12G108900	GLYMA_12G057400	GLYMA_18G004300	GLYMA_08G158800	GLYMA_04G175900	GLYMA_05G068400	GLYMA_02G269700	GLYMA_17G027300		GLYMA_20G120500
GLYMA_19G020700	GLYMA_20G102600	GLYMA_02G145100	GLYMA_12G093900	GLYMA_06G183400	GLYMA_07G264100	GLYMA_15G011000	GLYMA_12G100100	GLYMA_09G269100	GLYMA_20G142900		GLYMA_19G020700
GLYMA_05G003900	GLYMA_04G174300	GLYMA_19G119200	GLYMA_13G354900	GLYMA_11G169200	GLYMA_14G071100	GLYMA_02G148300	GLYMA_17G073200	GLYMA_14G207500	GLYMA_18G007100		GLYMA_05G003900
GLYMA_13G307300	GLYMA_09G070900	GLYMA_06G149500	GLYMA_05G108900	GLYMA_06G171700	GLYMA_13G325900	GLYMA_11G097100	GLYMA_04G051200	GLYMA_16G025700	GLYMA_08G239900		GLYMA_13G307300
GLYMA_03G018800	GLYMA_08G201700	GLYMA_06G030500	GLYMA_19G093100	GLYMA_13G004200	GLYMA_09G010500	GLYMA_04G207800	GLYMA_14G150600	GLYMA_U029700	GLYMA_17G214100		GLYMA_03G018800
GLYMA_14G171700	GLYMA_10G061300	GLYMA_13G288500	GLYMA_04G081700	GLYMA_10G138800	GLYMA_16G175400	GLYMA_13G281900	GLYMA_10G065600	GLYMA_10G039500	GLYMA_10G193200		GLYMA_14G171700
GLYMA_12G052100	GLYMA_13G203200	GLYMA_13G264400	GLYMA_18G011800	GLYMA_20G119200	GLYMA_02G200700	GLYMA_05G069300	GLYMA_06G122600	GLYMA_15G262600	GLYMA_14G080100		GLYMA_12G052100
GLYMA_14G087400	GLYMA_03G178100	GLYMA_06G017400	GLYMA_12G239600	GLYMA_02G007400	GLYMA_12G108900	GLYMA_06G318500	GLYMA_03G242100	GLYMA_03G143800	GLYMA_13G102800		GLYMA_14G087400
ENSRNA050000648	GLYMA_12G052500	GLYMA_19G143300	GLYMA_03G031100	GLYMA_14G148800	GLYMA_17G060600	GLYMA_17G221700	GLYMA_02G266600	GLYMA_10G230400	GLYMA_15G012700		ENSRNA050000648
GLYMA_07G270900	GLYMA_04G252600	GLYMA_15G138000	GLYMA_01G026200	GLYMA_08G358400	GLYMA_07G016300	GLYMA_16G025700	GLYMA_11G048700	GLYMA_06G082000	GLYMA_11G022100		GLYMA_07G270900
GLYMA_15G126100	GLYMA_12G046800	GLYMA_15G030100	GLYMA_10G001800	GLYMA_10G034900	GLYMA_05G110200	GLYMA_03G175100	GLYMA_01G191600	GLYMA_07G050700	GLYMA_20G135400		GLYMA_15G126100
GLYMA_08G209800	GLYMA_18G068500	GLYMA_20G189600	GLYMA_06G183400	GLYMA_10G271900	GLYMA_09G085700	GLYMA_08G254600	GLYMA_13G046800	GLYMA_05G196200	GLYMA_12G224000		GLYMA_08G209800
GLYMA_14G067800	GLYMA_09G049100	GLYMA_09G178200	GLYMA_13G124700	GLYMA_09G278200	GLYMA_08G272600	GLYMA_03G134100	GLYMA_18G043900	GLYMA_04G151000	GLYMA_19G250300		GLYMA_14G067800
GLYMA_03G107600	GLYMA_02G001000	GLYMA_20G097100	GLYMA_09G278100	GLYMA_04G019500	GLYMA_20G032500	GLYMA_16G160400	GLYMA_02G097000	GLYMA_01G034900	GLYMA_12G121700		GLYMA_03G107600
GLYMA_10G251400	GLYMA_03G249000	GLYMA_13G354900	GLYMA_06G224900	GLYMA_11G023200	GLYMA_16G042000	GLYMA_09G010600	GLYMA_17G047200	GLYMA_06G052000	GLYMA_07G091400		GLYMA_10G251400
GLYMA_04G184500	GLYMA_05G003900	GLYMA_02G289600	GLYMA_01G193700	GLYMA_04G022100	GLYMA_19G005800	GLYMA_09G134200	GLYMA_19G260000	GLYMA_03G006200	GLYMA_09G032100		GLYMA_04G184500
[truncated: 6,654 more rows]

## Sheet: Morden_up
Supplementary Table 1: Top-down analysis of up- and downregulated genes in each line-location. Individual line-location DE genes are listed (1-10) with their location identifiers: Brandon (B), Morden (M), Saskatoon (S). All unique gene IDs are listed as well as the commonly up/down-regulated genes within each location. Commonly DE genes across all 10 lines from each location were used for crossco…
M.01	M.02	M.03	M.04	M.05	M.06	M.07	M.08	M.09	M.10		Unique IDs 1-10		Commonly UP in all MORDEN lines 1-10	1226 commonly up in all 30
GLYMA_06G291100	GLYMA_03G103100	GLYMA_06G103300	GLYMA_10G092300	GLYMA_06G291100	GLYMA_14G120400	GLYMA_14G220900	GLYMA_14G220900	GLYMA_13G278000	GLYMA_03G103100		GLYMA_06G291100		GLYMA_07G242600
GLYMA_14G220900	GLYMA_04G180300	GLYMA_14G220900	GLYMA_20G059500	GLYMA_14G220900	GLYMA_14G220900	GLYMA_19G085200	GLYMA_17G203400	GLYMA_14G120400	GLYMA_18G146400		GLYMA_14G220900		GLYMA_17G031600
GLYMA_14G175700	GLYMA_04G180400	GLYMA_02G166900	GLYMA_16G033300	GLYMA_17G031600	GLYMA_17G203400	GLYMA_01G055700	GLYMA_11G255800	GLYMA_19G085200	GLYMA_04G180300		GLYMA_14G175700		GLYMA_13G043000
GLYMA_07G242600	GLYMA_06G184400	GLYMA_17G203400	GLYMA_14G220900	GLYMA_07G242600	GLYMA_02G028100	GLYMA_11G255800	GLYMA_03G170900	GLYMA_14G220900	GLYMA_09G184300		GLYMA_07G242600		GLYMA_02G239300
GLYMA_17G031600	GLYMA_18G208300	GLYMA_10G092400	GLYMA_14G209600	GLYMA_03G170900	GLYMA_13G043000	GLYMA_17G203400	GLYMA_17G031600	GLYMA_17G224900	GLYMA_06G184400		GLYMA_17G031600		GLYMA_16G201700
GLYMA_13G043000	GLYMA_10G092300	GLYMA_07G242600	GLYMA_10G092400	GLYMA_20G062700	GLYMA_17G031600	GLYMA_14G175700	GLYMA_18G106400	GLYMA_14G099900	GLYMA_17G261900		GLYMA_13G043000		GLYMA_04G100200
GLYMA_02G239300	GLYMA_03G054100	GLYMA_17G031600	GLYMA_14G175700	GLYMA_13G043000	GLYMA_07G242600	GLYMA_17G031600	GLYMA_07G242600	GLYMA_03G044900	GLYMA_03G054100		GLYMA_02G239300		GLYMA_20G062700
GLYMA_16G201700	GLYMA_17G224900	GLYMA_03G216900	GLYMA_11G255800	GLYMA_03G216900	GLYMA_03G216900	GLYMA_07G242600	GLYMA_13G043000	GLYMA_17G203400	GLYMA_03G053500		GLYMA_16G201700		GLYMA_08G070900
GLYMA_10G226200	GLYMA_19G027000	GLYMA_04G100200	GLYMA_14G064500	GLYMA_18G106400	GLYMA_04G100200	GLYMA_20G062700	GLYMA_20G062700	GLYMA_17G031600	GLYMA_07G162700		GLYMA_10G226200		GLYMA_03G216900
GLYMA_04G100200	GLYMA_05G102700	GLYMA_05G055200	GLYMA_09G188800	GLYMA_05G055200	GLYMA_05G055200	GLYMA_03G170900	GLYMA_02G028000	GLYMA_10G285300	GLYMA_19G027000		GLYMA_04G100200		GLYMA_14G031100
GLYMA_20G062700	GLYMA_10G092400	GLYMA_03G101800	GLYMA_18G106400	GLYMA_08G309700	GLYMA_03G170900	GLYMA_05G055200	GLYMA_06G160300	GLYMA_07G242600	GLYMA_07G156900		GLYMA_20G062700		GLYMA_14G018900
GLYMA_08G070900	GLYMA_03G044900	GLYMA_14G031100	GLYMA_07G088000	GLYMA_01G209500	GLYMA_14G031100	GLYMA_03G101800	GLYMA_19G171800	GLYMA_05G055200	GLYMA_17G171400		GLYMA_08G070900		GLYMA_07G258800
GLYMA_12G187100	GLYMA_17G203400	GLYMA_10G226200	GLYMA_03G170900	GLYMA_10G226200	GLYMA_18G106400	GLYMA_10G226200	GLYMA_09G202000	GLYMA_14G031100	GLYMA_12G158300		GLYMA_12G187100		GLYMA_18G251100
GLYMA_03G216900	GLYMA_11G255800	GLYMA_13G043000	GLYMA_14G220600	GLYMA_17G141700	GLYMA_08G070900	GLYMA_19G171800	GLYMA_09G038900	GLYMA_03G216900	GLYMA_04G180400		GLYMA_03G216900		GLYMA_05G055200
GLYMA_14G031100	GLYMA_03G170900	GLYMA_20G062700	GLYMA_14G064600	GLYMA_05G027000	GLYMA_17G066100	GLYMA_07G258800	GLYMA_07G258800	GLYMA_10G054200	GLYMA_17G031600		GLYMA_14G031100		GLYMA_11G133300
GLYMA_14G100000	GLYMA_17G031600	GLYMA_20G232700	GLYMA_19G250400	GLYMA_10G054200	GLYMA_05G003000	GLYMA_04G109900	GLYMA_05G055200	GLYMA_05G003000	GLYMA_07G242600		GLYMA_14G100000		GLYMA_19G003400
GLYMA_14G018900	GLYMA_09G188800	GLYMA_19G171800	GLYMA_17G031600	GLYMA_09G188800	GLYMA_09G188800	GLYMA_10G241700	GLYMA_04G079100	GLYMA_04G100200	GLYMA_03G216900		GLYMA_14G018900		GLYMA_02G250700
GLYMA_07G258800	GLYMA_07G242600	GLYMA_05G003000	GLYMA_13G043000	GLYMA_03G101800	GLYMA_20G163500	GLYMA_03G216900	GLYMA_08G070900	GLYMA_08G188600	GLYMA_05G055200		GLYMA_07G258800		GLYMA_03G171900
GLYMA_18G251100	GLYMA_18G106400	GLYMA_10G054200	GLYMA_15G024200	GLYMA_05G160700	GLYMA_19G171800	GLYMA_17G066100	GLYMA_03G101800	GLYMA_05G160700	GLYMA_04G100200		GLYMA_18G251100		GLYMA_03G261800
GLYMA_05G055200	GLYMA_13G043000	GLYMA_16G201700	GLYMA_02G028000	GLYMA_09G038900	GLYMA_03G261800	GLYMA_05G195900	GLYMA_05G027000	GLYMA_03G171900	GLYMA_13G043000		GLYMA_05G055200		GLYMA_11G234800
GLYMA_11G133300	GLYMA_09G038900	GLYMA_17G066100	GLYMA_20G062700	GLYMA_14G064500	GLYMA_08G035900	GLYMA_13G043000	GLYMA_13G365900	GLYMA_02G265900	GLYMA_10G226200		GLYMA_11G133300		GLYMA_15G150200
GLYMA_14G099900	GLYMA_19G168700	GLYMA_03G170900	GLYMA_07G242600	GLYMA_08G070900	GLYMA_02G250700	GLYMA_18G106400	GLYMA_19G033800	GLYMA_03G261800	GLYMA_12G196200		GLYMA_14G099900		GLYMA_19G171800
GLYMA_08G068700	GLYMA_04G100200	GLYMA_03G261800	GLYMA_06G291700	GLYMA_07G258800	GLYMA_10G226200	GLYMA_16G201700	GLYMA_10G226200	GLYMA_20G062700	GLYMA_08G188600		GLYMA_08G068700		GLYMA_03G170900
GLYMA_19G003400	GLYMA_14G064500	GLYMA_09G038900	GLYMA_08G070900	GLYMA_03G104800	GLYMA_05G160700	GLYMA_09G188800	GLYMA_17G141700	GLYMA_10G226200	GLYMA_06G103300		GLYMA_19G003400		GLYMA_04G109900
GLYMA_08G046700	GLYMA_20G062700	GLYMA_12G196200	GLYMA_09G038900	GLYMA_07G125100	GLYMA_10G054200	GLYMA_07G126900	GLYMA_16G201700	GLYMA_11G133300	GLYMA_07G126900		GLYMA_08G046700		GLYMA_01G129700
GLYMA_02G250700	GLYMA_07G088000	GLYMA_04G109900	GLYMA_18G094300	GLYMA_15G144000	GLYMA_02G239300	GLYMA_19G240800	GLYMA_14G018900	GLYMA_13G141200	GLYMA_10G213000		GLYMA_02G250700		GLYMA_15G005700
GLYMA_03G171900	GLYMA_19G250400	GLYMA_19G218300	GLYMA_01G221600	GLYMA_19G240800	GLYMA_10G241700	GLYMA_02G250700	GLYMA_12G187100	GLYMA_17G066100	GLYMA_03G261800		GLYMA_03G171900		GLYMA_09G038900
GLYMA_03G261800	GLYMA_15G144000	GLYMA_08G070900	GLYMA_15G239600	GLYMA_16G201700	GLYMA_18G251000	GLYMA_03G261800	GLYMA_15G258600	GLYMA_19G213500	GLYMA_20G062700		GLYMA_03G261800		GLYMA_10G054200
GLYMA_17G224900	GLYMA_11G022100	GLYMA_08G270000	GLYMA_11G022100	GLYMA_15G032500	GLYMA_09G228000	GLYMA_05G027000	GLYMA_11G032700	GLYMA_13G043000	GLYMA_18G251100		GLYMA_17G224900		GLYMA_08G188600
GLYMA_11G234800	GLYMA_01G209500	GLYMA_02G250700	GLYMA_04G195600	GLYMA_04G109900	GLYMA_19G240800	GLYMA_14G100000	GLYMA_09G188800	GLYMA_15G252700	GLYMA_08G070900		GLYMA_11G234800		GLYMA_19G240800
GLYMA_15G150200	GLYMA_18G274200	GLYMA_19G003400	GLYMA_08G251500	GLYMA_19G171800	GLYMA_13G130600	GLYMA_12G196200	GLYMA_15G239300	GLYMA_06G014100	GLYMA_05G003000		GLYMA_15G150200		GLYMA_17G066100
GLYMA_19G171800	GLYMA_03G101800	GLYMA_18G106400	GLYMA_02G259800	GLYMA_14G029800	GLYMA_02G181600	GLYMA_15G239300	GLYMA_04G109900	GLYMA_10G241700	GLYMA_15G097400		GLYMA_19G171800		GLYMA_11G032700
GLYMA_03G170900	GLYMA_05G027000	GLYMA_08G003500	GLYMA_01G209500	GLYMA_15G258600	GLYMA_15G258600	GLYMA_08G035900	GLYMA_08G309700	GLYMA_19G003400	GLYMA_02G250700		GLYMA_03G170900		GLYMA_08G035900
GLYMA_15G012600	GLYMA_05G055200	GLYMA_02G239300	GLYMA_05G027000	GLYMA_07G220300	GLYMA_16G201700	GLYMA_05G003000	GLYMA_14G031100	GLYMA_19G212700	GLYMA_18G251000		GLYMA_15G012600		GLYMA_11G208600
GLYMA_04G109900	GLYMA_02G287400	GLYMA_18G251000	GLYMA_19G085200	GLYMA_08G270000	GLYMA_04G079100	GLYMA_09G038900	GLYMA_03G035600	GLYMA_03G170900	GLYMA_03G042000		GLYMA_04G109900		GLYMA_11G223000
GLYMA_01G129700	GLYMA_19G085200	GLYMA_05G195900	GLYMA_03G040100	GLYMA_01G129700	GLYMA_18G251100	GLYMA_08G270000	GLYMA_06G022900	GLYMA_12G132800	GLYMA_15G005700		GLYMA_01G129700		GLYMA_09G188800
GLYMA_15G005700	GLYMA_08G070900	GLYMA_11G133300	GLYMA_02G287400	GLYMA_17G066100	GLYMA_07G258800	GLYMA_04G100200	GLYMA_06G125500	GLYMA_05G195900	GLYMA_18G034600		GLYMA_15G005700		GLYMA_18G285100
GLYMA_17G259800	GLYMA_14G064600	GLYMA_05G226000	GLYMA_14G165000	GLYMA_04G079100	GLYMA_09G038900	GLYMA_17G224900	GLYMA_09G150300	GLYMA_11G032700	GLYMA_10G193500		GLYMA_17G259800		GLYMA_12G132800
GLYMA_09G177800	GLYMA_20G163500	GLYMA_11G032700	GLYMA_06G022900	GLYMA_05G003000	GLYMA_08G270000	GLYMA_11G234800	GLYMA_13G038600	GLYMA_06G154500	GLYMA_05G195900		GLYMA_09G177800		GLYMA_18G034600
GLYMA_09G038900	GLYMA_04G079100	GLYMA_18G034600	GLYMA_18G236700	GLYMA_15G150200	GLYMA_19G114600	GLYMA_08G068700	GLYMA_05G003000	GLYMA_02G028000	GLYMA_08G270000		GLYMA_09G038900		GLYMA_19G212700
GLYMA_10G054200	GLYMA_18G030700	GLYMA_09G188800	GLYMA_02G010600	GLYMA_02G239300	GLYMA_08G003500	GLYMA_11G032700	GLYMA_07G101000	GLYMA_18G251100	GLYMA_20G232700		GLYMA_10G054200		GLYMA_13G141200
GLYMA_08G188600	GLYMA_06G022900	GLYMA_11G223000	GLYMA_15G002300	GLYMA_10G241700	GLYMA_02G265900	GLYMA_06G154500	GLYMA_17G259800	GLYMA_08G003500	GLYMA_01G012700		GLYMA_08G188600		GLYMA_10G256100
GLYMA_19G240800	GLYMA_02G010600	GLYMA_03G171900	GLYMA_19G014500	GLYMA_20G163500	GLYMA_14G064500	GLYMA_18G285100	GLYMA_01G209500	GLYMA_19G218300	GLYMA_07G157000		GLYMA_19G240800		GLYMA_15G042500
GLYMA_17G066100	GLYMA_08G035900	GLYMA_19G212700	GLYMA_04G079100	GLYMA_04G100200	GLYMA_05G195900	GLYMA_15G005700	GLYMA_04G223000	GLYMA_02G250700	GLYMA_02G160800		GLYMA_17G066100		GLYMA_05G195900
GLYMA_09G149900	GLYMA_16G201700	GLYMA_05G027000	GLYMA_04G109900	GLYMA_01G221600	GLYMA_08G068700	GLYMA_14G064500	GLYMA_14G064500	GLYMA_05G027000	GLYMA_12G132800		GLYMA_09G149900		GLYMA_12G181000
GLYMA_11G032700	GLYMA_09G202000	GLYMA_15G150200	GLYMA_11G208600	GLYMA_14G018900	GLYMA_05G226000	GLYMA_18G251000	GLYMA_13G040100	GLYMA_19G171800	GLYMA_16G201700		GLYMA_11G032700		GLYMA_09G012200
GLYMA_08G035900	GLYMA_16G061400	GLYMA_01G209500	GLYMA_19G171800	GLYMA_19G218300	GLYMA_20G062700	GLYMA_02G265900	GLYMA_13G141200	GLYMA_18G251000	GLYMA_11G223000		GLYMA_08G035900		GLYMA_04G100600
GLYMA_11G208600	GLYMA_02G259800	GLYMA_11G234800	GLYMA_13G160400	GLYMA_06G160300	GLYMA_18G012300	GLYMA_17G209900	GLYMA_16G188900	GLYMA_15G150200	GLYMA_12G015300		GLYMA_11G208600		GLYMA_18G106400
GLYMA_11G223000	GLYMA_03G221300	GLYMA_15G144000	GLYMA_13G089800	GLYMA_11G234800	GLYMA_13G040100	GLYMA_04G010600	GLYMA_15G024200	GLYMA_07G126900	GLYMA_03G171900		GLYMA_11G223000		GLYMA_19G218300
GLYMA_09G188800	GLYMA_03G252800	GLYMA_12G195600	GLYMA_17G141700	GLYMA_20G232700	GLYMA_11G162500	GLYMA_15G150200	GLYMA_18G251100	GLYMA_03G101800	GLYMA_12G181000		GLYMA_09G188800		GLYMA_07G125100
GLYMA_18G285100	GLYMA_03G040100	GLYMA_05G160700	GLYMA_08G035900	GLYMA_15G042500	GLYMA_08G188600	GLYMA_11G133300	GLYMA_10G200800	GLYMA_12G196200	GLYMA_19G003400		GLYMA_18G285100		GLYMA_13G350300
GLYMA_09G022500	GLYMA_08G053700	GLYMA_13G084000	GLYMA_19G171900	GLYMA_03G261800	GLYMA_11G223000	GLYMA_05G075000	GLYMA_12G049200	GLYMA_10G089800	GLYMA_10G241700		GLYMA_09G022500		GLYMA_08G003500
GLYMA_05G032800	GLYMA_15G258600	GLYMA_03G221400	GLYMA_15G012600	GLYMA_09G278000	GLYMA_15G005700	GLYMA_17G139500	GLYMA_08G035900	GLYMA_20G232700	GLYMA_14G031100		GLYMA_05G032800		GLYMA_13G062500
GLYMA_12G197300	GLYMA_12G202700	GLYMA_12G189000	GLYMA_06G160300	GLYMA_13G130600	GLYMA_12G196200	GLYMA_13G141200	GLYMA_08G270000	GLYMA_09G012200	GLYMA_20G041100		GLYMA_12G197300		GLYMA_08G033100
GLYMA_12G132800	GLYMA_11G208600	GLYMA_03G001600	GLYMA_20G163500	GLYMA_01G085200	GLYMA_17G224900	GLYMA_04G104700	GLYMA_07G220300	GLYMA_02G239300	GLYMA_05G032800		GLYMA_12G132800		GLYMA_07G126900
GLYMA_18G034600	GLYMA_08G251500	GLYMA_17G139500	GLYMA_19G207000	GLYMA_08G068700	GLYMA_04G023000	GLYMA_08G070900	GLYMA_13G130600	GLYMA_14G053900	GLYMA_17G259800		GLYMA_18G034600		GLYMA_17G141700
GLYMA_19G212700	GLYMA_10G226200	GLYMA_17G141700	GLYMA_03G035600	GLYMA_07G088000	GLYMA_18G285100	GLYMA_06G014100	GLYMA_02G265900	GLYMA_13G288000	GLYMA_U041300		GLYMA_19G212700		GLYMA_05G027000
GLYMA_14G160700	GLYMA_18G236700	GLYMA_08G035900	GLYMA_17G015400	GLYMA_13G350300	GLYMA_07G125100	GLYMA_08G003500	GLYMA_03G040100	GLYMA_12G189000	GLYMA_14G204900		GLYMA_14G160700		GLYMA_08G309700
GLYMA_09G076200	GLYMA_13G089800	GLYMA_10G132500	GLYMA_08G175300	GLYMA_07G133700	GLYMA_11G234800	GLYMA_01G100000	GLYMA_17G230000	GLYMA_09G202000	GLYMA_01G178300		GLYMA_09G076200		GLYMA_05G226000
GLYMA_13G141200	GLYMA_13G141200	GLYMA_06G154500	GLYMA_18G288800	GLYMA_19G033800	GLYMA_17G141700	GLYMA_12G149500	GLYMA_15G239200	GLYMA_18G034600	GLYMA_14G116300		GLYMA_13G141200		GLYMA_18G251000
GLYMA_14G116300	GLYMA_15G239300	GLYMA_14G066000	GLYMA_08G033000	GLYMA_13G089800	GLYMA_05G027000	GLYMA_13G040100	GLYMA_02G287400	GLYMA_10G132500	GLYMA_11G133300		GLYMA_14G116300		GLYMA_05G003000
GLYMA_10G256100	GLYMA_07G205200	GLYMA_02G292100	GLYMA_15G258600	GLYMA_11G032700	GLYMA_19G003400	GLYMA_18G030700	GLYMA_10G241700	GLYMA_11G223000	GLYMA_19G219800		GLYMA_10G256100		GLYMA_10G132500
GLYMA_15G042500	GLYMA_19G171900	GLYMA_10G193500	GLYMA_11G185100	GLYMA_06G026600	GLYMA_04G109900	GLYMA_14G087800	GLYMA_20G163500	GLYMA_02G181800	GLYMA_17G139500		GLYMA_15G042500		GLYMA_11G012900
GLYMA_05G195900	GLYMA_07G258800	GLYMA_05G032800	GLYMA_07G133700	GLYMA_18G266100	GLYMA_02G292100	GLYMA_15G024200	GLYMA_20G232700	GLYMA_08G070900	GLYMA_04G133500		GLYMA_05G195900		GLYMA_02G265900
GLYMA_12G181000	GLYMA_05G003000	GLYMA_01G230000	GLYMA_03G217700	GLYMA_14G031100	GLYMA_18G057200	GLYMA_19G033800	GLYMA_05G160700	GLYMA_10G048500	GLYMA_08G000700		GLYMA_12G181000		GLYMA_07G086700
GLYMA_17G011800	GLYMA_03G035600	GLYMA_02G265900	GLYMA_07G258800	GLYMA_13G208300	GLYMA_19G171900	GLYMA_04G133500	GLYMA_10G054200	GLYMA_02G169100	GLYMA_02G154300		GLYMA_17G011800		GLYMA_17G236500
GLYMA_08G360400	GLYMA_02G028000	GLYMA_08G188600	GLYMA_04G003200	GLYMA_19G003400	GLYMA_17G054500	GLYMA_19G212700	GLYMA_09G184000	GLYMA_18G238100	GLYMA_08G003500		GLYMA_08G360400		GLYMA_11G164800
GLYMA_09G012200	GLYMA_06G160300	GLYMA_13G306200	GLYMA_12G202700	GLYMA_13G365900	GLYMA_18G034600	GLYMA_10G132500	GLYMA_11G180600	GLYMA_11G234800	GLYMA_09G150300		GLYMA_09G012200		GLYMA_08G270000
GLYMA_04G100600	GLYMA_13G365900	GLYMA_12G011500	GLYMA_19G046000	GLYMA_06G022900	GLYMA_19G214500	GLYMA_18G034600	GLYMA_19G218300	GLYMA_03G170800	GLYMA_08G068700		GLYMA_04G100600		GLYMA_20G232700
GLYMA_18G106400	GLYMA_19G240800	GLYMA_15G042500	GLYMA_09G202000	GLYMA_13G141200	GLYMA_15G239200	GLYMA_02G239300	GLYMA_12G197300	GLYMA_09G188800	GLYMA_03G170900		GLYMA_18G106400		GLYMA_04G010600
GLYMA_15G239200	GLYMA_07G133700	GLYMA_18G055800	GLYMA_15G011000	GLYMA_11G030800	GLYMA_03G035600	GLYMA_17G141700	GLYMA_18G251000	GLYMA_08G314700	GLYMA_10G132500		GLYMA_15G239200		GLYMA_05G226100
GLYMA_07G205200	GLYMA_13G208300	GLYMA_14G018900	GLYMA_13G141200	GLYMA_08G168400	GLYMA_10G048500	GLYMA_13G365900	GLYMA_13G044500	GLYMA_12G226500	GLYMA_09G038900		GLYMA_07G205200		GLYMA_17G139500
GLYMA_09G033700	GLYMA_17G141700	GLYMA_13G130600	GLYMA_15G239200	GLYMA_03G035600	GLYMA_06G125500	GLYMA_20G163500	GLYMA_17G139500	GLYMA_20G163500	GLYMA_14G134900		GLYMA_09G033700		GLYMA_20G163500
GLYMA_10G089800	GLYMA_19G213500	GLYMA_01G221600	GLYMA_18G123100	GLYMA_15G239300	GLYMA_12G049200	GLYMA_04G100600	GLYMA_18G030700	GLYMA_08G270000	GLYMA_06G014100		GLYMA_10G089800		GLYMA_12G196200
GLYMA_07G192300	GLYMA_01G221600	GLYMA_07G258800	GLYMA_03G101800	GLYMA_19G168700	GLYMA_03G101800	GLYMA_03G035600	GLYMA_04G043500	GLYMA_18G106400	GLYMA_19G060900		GLYMA_07G192300		GLYMA_13G130600
GLYMA_19G218300	GLYMA_19G218300	GLYMA_03G104800	GLYMA_13G365900	GLYMA_15G024200	GLYMA_07G126900	GLYMA_19G003400	GLYMA_15G144000	GLYMA_13G136300	GLYMA_20G196900		GLYMA_19G218300		GLYMA_10G241700
GLYMA_07G125100	GLYMA_15G012600	GLYMA_07G086700	GLYMA_16G201700	GLYMA_20G147200	GLYMA_03G171900	GLYMA_12G132800	GLYMA_18G057200	GLYMA_18G225000	GLYMA_15G058000		GLYMA_07G125100		GLYMA_06G022900
GLYMA_13G350300	GLYMA_13G130600	GLYMA_05G042800	GLYMA_01G011500	GLYMA_05G160200	GLYMA_19G218300	GLYMA_01G108200	GLYMA_11G208600	GLYMA_17G044700	GLYMA_10G089800		GLYMA_13G350300		GLYMA_03G104800
GLYMA_04G104100	GLYMA_14G009000	GLYMA_01G036900	GLYMA_05G160700	GLYMA_13G038600	GLYMA_07G039000	GLYMA_19G218300	GLYMA_12G189000	GLYMA_19G240800	GLYMA_12G195600		GLYMA_04G104100		GLYMA_05G055300
GLYMA_08G003500	GLYMA_20G232700	GLYMA_14G134900	GLYMA_05G003000	GLYMA_19G147700	GLYMA_01G230000	GLYMA_11G223000	GLYMA_02G259800	GLYMA_12G049200	GLYMA_18G143400		GLYMA_08G003500		GLYMA_15G024200
GLYMA_14G134900	GLYMA_17G230000	GLYMA_20G163500	GLYMA_04G255600	GLYMA_05G072200	GLYMA_06G154500	GLYMA_10G048500	GLYMA_03G170800	GLYMA_15G082100	GLYMA_05G027000		GLYMA_14G134900		GLYMA_18G277500
GLYMA_13G062500	GLYMA_19G171800	GLYMA_04G023000	GLYMA_19G168700	GLYMA_18G251000	GLYMA_11G208600	GLYMA_17G259800	GLYMA_03G216100	GLYMA_15G097400	GLYMA_17G141700		GLYMA_13G062500		GLYMA_14G067700
GLYMA_09G202000	GLYMA_07G220300	GLYMA_09G202000	GLYMA_11G032700	GLYMA_09G228000	GLYMA_20G135400	GLYMA_17G230000	GLYMA_07G125100	GLYMA_01G020400	GLYMA_15G239300		GLYMA_09G202000		GLYMA_11G074900
GLYMA_09G150300	GLYMA_18G055800	GLYMA_12G132800	GLYMA_07G125100	GLYMA_02G181600	GLYMA_11G032700	GLYMA_02G160800	GLYMA_03G261800	GLYMA_17G139500	GLYMA_11G234800		GLYMA_09G150300		GLYMA_01G209500
GLYMA_13G176500	GLYMA_05G226000	GLYMA_04G079100	GLYMA_08G168400	GLYMA_15G124000	GLYMA_15G228900	GLYMA_06G160300	GLYMA_13G304900	GLYMA_14G173600	GLYMA_14G120400		GLYMA_13G176500		GLYMA_13G358600
GLYMA_06G125500	GLYMA_03G217700	GLYMA_11G056600	GLYMA_15G042500	GLYMA_10G099800	GLYMA_13G044500	GLYMA_01G129700	GLYMA_04G010600	GLYMA_03G221400	GLYMA_04G109900		GLYMA_06G125500		GLYMA_05G160700
GLYMA_15G239300	GLYMA_08G168400	GLYMA_18G225000	GLYMA_08G132700	GLYMA_08G053700	GLYMA_17G139500	GLYMA_03G218800	GLYMA_03G216900	GLYMA_15G012600	GLYMA_17G171500		GLYMA_15G239300		GLYMA_10G048500
GLYMA_08G033100	GLYMA_14G197500	GLYMA_18G285100	GLYMA_03G252800	GLYMA_03G144700	GLYMA_14G029900	GLYMA_04G079100	GLYMA_02G028200	GLYMA_04G010600	GLYMA_19G218300		GLYMA_08G033100		GLYMA_15G258600
GLYMA_07G126900	GLYMA_17G066100	GLYMA_20G196900	GLYMA_18G030700	GLYMA_04G106400	GLYMA_03G221400	GLYMA_18G267900	GLYMA_03G104800	GLYMA_12G029600	GLYMA_10G137300		GLYMA_07G126900		GLYMA_10G229800
GLYMA_17G141700	GLYMA_05G160700	GLYMA_18G192100	GLYMA_11G244900	GLYMA_11G208600	GLYMA_14G066000	GLYMA_15G144000	GLYMA_18G266100	GLYMA_14G067400	GLYMA_13G050700		GLYMA_17G141700		GLYMA_13G136300
GLYMA_05G027000	GLYMA_10G054200	GLYMA_07G126900	GLYMA_03G104800	GLYMA_10G132500	GLYMA_07G126600	GLYMA_06G179200	GLYMA_13G089800	GLYMA_14G066000	GLYMA_13G306300		GLYMA_05G027000		GLYMA_01G178300
GLYMA_08G309700	GLYMA_03G008100	GLYMA_13G050700	GLYMA_15G150200	GLYMA_13G040100	GLYMA_13G089800	GLYMA_14G116300	GLYMA_06G014100	GLYMA_07G215100	GLYMA_13G306200		GLYMA_08G309700		GLYMA_15G032500
GLYMA_07G271800	GLYMA_17G015400	GLYMA_07G205700	GLYMA_04G071600	GLYMA_09G150300	GLYMA_15G077700	GLYMA_06G113300	GLYMA_08G200000	GLYMA_02G160800	GLYMA_19G066300		GLYMA_07G271800		GLYMA_06G102400
GLYMA_05G226000	GLYMA_08G033000	GLYMA_17G054500	GLYMA_17G066100	GLYMA_17G139500	GLYMA_01G221600	GLYMA_19G213500	GLYMA_15G180200	GLYMA_10G213000	GLYMA_14G067400		GLYMA_05G226000		GLYMA_19G260900
GLYMA_18G251000	GLYMA_03G216900	GLYMA_17G253800	GLYMA_08G053700	GLYMA_02G010600	GLYMA_13G365900	GLYMA_02G028000	GLYMA_14G051900	GLYMA_18G030700	GLYMA_04G013400		GLYMA_18G251000		GLYMA_02G228000
GLYMA_05G003000	GLYMA_09G228000	GLYMA_01G178300	GLYMA_01G095500	GLYMA_13G304900	GLYMA_19G213500	GLYMA_06G125500	GLYMA_07G126900	GLYMA_06G037900	GLYMA_01G036900		GLYMA_05G003000		GLYMA_13G089800
GLYMA_13G044500	GLYMA_14G051900	GLYMA_15G012600	GLYMA_06G093600	GLYMA_15G002300	GLYMA_15G252700	GLYMA_03G221400	GLYMA_11G234800	GLYMA_20G045800	GLYMA_10G048500		GLYMA_13G044500		GLYMA_12G195600
GLYMA_04G238400	GLYMA_18G251000	GLYMA_08G360400	GLYMA_09G228000	GLYMA_02G250700	GLYMA_12G105700	GLYMA_14G031100	GLYMA_03G221400	GLYMA_07G126600	GLYMA_12G105700		GLYMA_04G238400		GLYMA_14G066000
GLYMA_13G304900	GLYMA_08G270000	GLYMA_16G179100	GLYMA_04G091800	GLYMA_11G022100	GLYMA_13G350400	GLYMA_20G232700	GLYMA_20G204500	GLYMA_20G196900	GLYMA_10G230200		GLYMA_13G304900		GLYMA_07G215100
GLYMA_20G162900	GLYMA_19G003400	GLYMA_10G048500	GLYMA_16G061400	GLYMA_11G133300	GLYMA_15G024200	GLYMA_13G208300	GLYMA_19G213500	GLYMA_03G211700	GLYMA_11G032700		GLYMA_20G162900		GLYMA_17G065400
GLYMA_10G132500	GLYMA_15G150200	GLYMA_07G181300	GLYMA_03G131700	GLYMA_15G239700	GLYMA_19G212700	GLYMA_18G266100	GLYMA_10G132500	GLYMA_01G129700	GLYMA_18G106400		GLYMA_10G132500		GLYMA_13G331600
GLYMA_15G144000	GLYMA_03G261800	GLYMA_15G024200	GLYMA_14G051900	GLYMA_17G224900	GLYMA_11G133300	GLYMA_05G226000	GLYMA_09G278000	GLYMA_14G134900	GLYMA_07G086700		GLYMA_15G144000		GLYMA_09G061300
GLYMA_11G012900	GLYMA_08G319200	GLYMA_09G177800	GLYMA_10G054200	GLYMA_18G251100	GLYMA_11G022100	GLYMA_03G192200	GLYMA_12G195600	GLYMA_20G207300	GLYMA_08G046700		GLYMA_11G012900		GLYMA_04G079100
GLYMA_01G198000	GLYMA_03G104800	GLYMA_13G141200	GLYMA_18G057200	GLYMA_17G229000	GLYMA_15G144000	GLYMA_02G287400	GLYMA_12G193400	GLYMA_19G033800	GLYMA_19G024700		GLYMA_01G198000		GLYMA_18G225000
GLYMA_11G180600	GLYMA_03G216100	GLYMA_13G136300	GLYMA_09G208700	GLYMA_08G056700	GLYMA_18G030700	GLYMA_07G039000	GLYMA_19G003400	GLYMA_19G013000	GLYMA_01G206900		GLYMA_11G180600		GLYMA_19G219800
GLYMA_06G058700	GLYMA_17G065100	GLYMA_13G044500	GLYMA_15G079500	GLYMA_04G225400	GLYMA_13G208300	GLYMA_11G150700	GLYMA_01G198000	GLYMA_11G158200	GLYMA_18G218800		GLYMA_06G058700		GLYMA_14G094500
GLYMA_05G202100	GLYMA_10G132500	GLYMA_17G236500	GLYMA_09G184000	GLYMA_15G210600	GLYMA_11G056600	GLYMA_01G209500	GLYMA_13G350300	GLYMA_13G306300	GLYMA_03G053600		GLYMA_05G202100		GLYMA_13G304100
GLYMA_02G265900	GLYMA_16G166000	GLYMA_17G259800	GLYMA_14G009000	GLYMA_05G032800	GLYMA_13G136300	GLYMA_01G198000	GLYMA_11G022100	GLYMA_16G201700	GLYMA_07G220300		GLYMA_02G265900		GLYMA_17G123400
GLYMA_15G097400	GLYMA_13G038600	GLYMA_15G097400	GLYMA_14G197500	GLYMA_20G087900	GLYMA_12G181000	GLYMA_03G170800	GLYMA_16G166000	GLYMA_01G036900	GLYMA_19G026000		GLYMA_15G097400		GLYMA_02G093200
GLYMA_07G086700	GLYMA_18G057200	GLYMA_18G012300	GLYMA_03G008100	GLYMA_02G028000	GLYMA_08G314700	GLYMA_15G032500	GLYMA_07G086700	GLYMA_17G141700	GLYMA_15G150200		GLYMA_07G086700		GLYMA_07G027300
GLYMA_17G236500	GLYMA_09G278000	GLYMA_01G061900	GLYMA_10G241700	GLYMA_08G035900	GLYMA_17G029500	GLYMA_05G013700	GLYMA_02G089900	GLYMA_10G193500	GLYMA_12G049200		GLYMA_17G236500		GLYMA_01G137200
GLYMA_17G048600	GLYMA_15G002300	GLYMA_04G010600	GLYMA_15G239300	GLYMA_07G141500	GLYMA_13G279800	GLYMA_10G089800	GLYMA_10G218900	GLYMA_16G179100	GLYMA_14G066000		GLYMA_17G048600		GLYMA_05G075000
GLYMA_11G164800	GLYMA_06G093600	GLYMA_19G213500	GLYMA_20G152600	GLYMA_04G026700	GLYMA_13G050700	GLYMA_19G168700	GLYMA_02G003800	GLYMA_18G266100	GLYMA_05G055400		GLYMA_11G164800		GLYMA_04G137600
GLYMA_04G042100	GLYMA_10G011000	GLYMA_19G260900	GLYMA_07G220300	GLYMA_08G039400	GLYMA_12G132800	GLYMA_11G180600	GLYMA_02G250700	GLYMA_07G220300	GLYMA_03G001600		GLYMA_04G042100		GLYMA_01G124500
GLYMA_08G270000	GLYMA_06G179200	GLYMA_20G186200	GLYMA_07G126600	GLYMA_05G226000	GLYMA_05G160200	GLYMA_09G202000	GLYMA_05G075100	GLYMA_14G116300	GLYMA_09G012200		GLYMA_08G270000		GLYMA_17G230000
GLYMA_10G026100	GLYMA_08G353500	GLYMA_03G069200	GLYMA_08G287500	GLYMA_12G015300	GLYMA_03G216100	GLYMA_19G142000	GLYMA_05G195900	GLYMA_17G211900	GLYMA_13G136300		GLYMA_10G026100		GLYMA_18G210900
GLYMA_20G232700	GLYMA_11G162500	GLYMA_20G147600	GLYMA_07G126900	GLYMA_09G190200	GLYMA_04G133500	GLYMA_06G022900	GLYMA_14G087800	GLYMA_07G125100	GLYMA_10G004800		GLYMA_20G232700		GLYMA_18G030700
GLYMA_12G177600	GLYMA_08G188600	GLYMA_14G007000	GLYMA_13G098000	GLYMA_18G071400	GLYMA_03G001600	GLYMA_12G189000	GLYMA_05G072200	GLYMA_04G100600	GLYMA_17G066100		GLYMA_12G177600		GLYMA_07G126600
GLYMA_10G283700	GLYMA_02G228000	GLYMA_01G129700	GLYMA_08G309700	GLYMA_03G221400	GLYMA_16G179100	GLYMA_08G011700	GLYMA_19G171900	GLYMA_10G043800	GLYMA_07G258800		GLYMA_10G283700		GLYMA_09G166300
GLYMA_08G168400	GLYMA_02G181600	GLYMA_13G279800	GLYMA_06G026600	GLYMA_04G238400	GLYMA_14G053900	GLYMA_12G197300	GLYMA_11G056600	GLYMA_08G254400	GLYMA_11G074900		GLYMA_08G168400		GLYMA_17G107800
GLYMA_07G181300	GLYMA_06G052800	GLYMA_13G206700	GLYMA_09G046200	GLYMA_18G057200	GLYMA_15G042500	GLYMA_06G058700	GLYMA_02G046200	GLYMA_17G253800	GLYMA_09G149900		GLYMA_07G181300		GLYMA_17G015400
GLYMA_02G160800	GLYMA_15G024200	GLYMA_11G012900	GLYMA_13G130600	GLYMA_19G212700	GLYMA_15G032500	GLYMA_15G239200	GLYMA_03G171900	GLYMA_05G075100	GLYMA_19G260900		GLYMA_02G160800		GLYMA_03G035600
GLYMA_01G126500	GLYMA_19G013000	GLYMA_10G295300	GLYMA_03G163100	GLYMA_07G126600	GLYMA_18G225000	GLYMA_11G022100	GLYMA_12G181000	GLYMA_19G260900	GLYMA_19G213500		GLYMA_01G126500		GLYMA_20G196200
GLYMA_02G126600	GLYMA_19G033800	GLYMA_15G014500	GLYMA_06G084700	GLYMA_17G054500	GLYMA_19G168700	GLYMA_02G022100	GLYMA_08G033100	GLYMA_09G141800	GLYMA_06G240900		GLYMA_02G126600		GLYMA_17G211900
GLYMA_07G116800	GLYMA_08G309700	GLYMA_18G251100	GLYMA_02G239300	GLYMA_06G014100	GLYMA_06G022900	GLYMA_05G025600	GLYMA_06G058800	GLYMA_02G218000	GLYMA_13G242600		GLYMA_07G116800		GLYMA_01G036900
GLYMA_12G226500	GLYMA_11G133300	GLYMA_06G052800	GLYMA_03G221300	GLYMA_17G236500	GLYMA_05G094300	GLYMA_18G286700	GLYMA_14G053900	GLYMA_14G100000	GLYMA_15G244400		GLYMA_12G226500		GLYMA_12G011400
GLYMA_07G045800	GLYMA_02G239300	GLYMA_11G030800	GLYMA_16G166000	GLYMA_02G259800	GLYMA_04G254500	GLYMA_08G188600	GLYMA_07G181300	GLYMA_02G285000	GLYMA_08G360400		GLYMA_07G045800		GLYMA_01G108200
GLYMA_04G010600	GLYMA_06G026600	GLYMA_19G240800	GLYMA_18G038000	GLYMA_08G024400	GLYMA_01G210500	GLYMA_14G134900	GLYMA_02G239300	GLYMA_15G042500	GLYMA_18G266100		GLYMA_04G010600		GLYMA_06G052800
GLYMA_10G213000	GLYMA_05G075000	GLYMA_06G307600	GLYMA_04G026700	GLYMA_08G329600	GLYMA_04G128500	GLYMA_13G319100	GLYMA_17G236500	GLYMA_12G115600	GLYMA_18G225000		GLYMA_10G213000		GLYMA_08G335000
GLYMA_10G052200	GLYMA_07G126900	GLYMA_18G030700	GLYMA_19G250200	GLYMA_10G247300	GLYMA_06G093600	GLYMA_16G179100	GLYMA_04G104100	GLYMA_06G260900	GLYMA_11G216700		GLYMA_10G052200		GLYMA_16G179100
GLYMA_05G226100	GLYMA_15G239200	GLYMA_19G221800	GLYMA_01G129700	GLYMA_03G141800	GLYMA_17G238200	GLYMA_14G066000	GLYMA_08G188600	GLYMA_05G226000	GLYMA_14G067700		GLYMA_05G226100		GLYMA_04G023000
GLYMA_17G139500	GLYMA_15G228900	GLYMA_19G242000	GLYMA_18G251100	GLYMA_13G160400	GLYMA_15G150200	GLYMA_13G136300	GLYMA_02G285000	GLYMA_18G301200	GLYMA_16G179100		GLYMA_17G139500		GLYMA_13G050700
GLYMA_13G365900	GLYMA_01G100000	GLYMA_05G109600	GLYMA_17G171000	GLYMA_02G154300	GLYMA_17G198700	GLYMA_17G252500	GLYMA_11G133300	GLYMA_07G271800	GLYMA_11G158200		GLYMA_13G365900		GLYMA_07G009900
GLYMA_15G121000	GLYMA_19G120600	GLYMA_12G105700	GLYMA_13G057600	GLYMA_13G114200	GLYMA_03G016900	GLYMA_19G147200	GLYMA_04G100200	GLYMA_04G128500	GLYMA_04G133400		GLYMA_15G121000		GLYMA_11G158200
GLYMA_20G163500	GLYMA_14G087800	GLYMA_11G074900	GLYMA_13G038600	GLYMA_08G033000	GLYMA_08G132700	GLYMA_15G012600	GLYMA_09G190200	GLYMA_04G133400	GLYMA_13G084000		GLYMA_20G163500		GLYMA_08G341100
GLYMA_18G031900	GLYMA_06G291700	GLYMA_07G116800	GLYMA_06G324100	GLYMA_11G012900	GLYMA_13G358600	GLYMA_03G146400	GLYMA_01G100000	GLYMA_05G032800	GLYMA_13G141200		GLYMA_18G031900		GLYMA_05G042800
GLYMA_06G014100	GLYMA_10G241700	GLYMA_03G035600	GLYMA_20G147200	GLYMA_02G287400	GLYMA_11G109200	GLYMA_17G054500	GLYMA_07G039000	GLYMA_01G178300	GLYMA_U028500		GLYMA_06G014100		GLYMA_13G160400
GLYMA_12G196200	GLYMA_10G099800	GLYMA_17G230000	GLYMA_02G095600	GLYMA_03G201800	GLYMA_17G211900	GLYMA_15G042500	GLYMA_12G105700	GLYMA_11G074900	GLYMA_12G177600		GLYMA_12G196200		GLYMA_05G075100
GLYMA_11G025000	GLYMA_14G018900	GLYMA_14G173600	GLYMA_15G239700	GLYMA_09G028400	GLYMA_15G239300	GLYMA_16G166000	GLYMA_20G135400	GLYMA_06G318200	GLYMA_02G239300		GLYMA_11G025000		GLYMA_01G239800
GLYMA_02G222000	GLYMA_07G107200	GLYMA_11G158200	GLYMA_09G012400	GLYMA_12G049200	GLYMA_03G069200	GLYMA_12G181000	GLYMA_12G149500	GLYMA_20G147700	GLYMA_19G240800		GLYMA_02G222000		GLYMA_02G143200
GLYMA_18G057200	GLYMA_02G051300	GLYMA_13G306300	GLYMA_13G148700	GLYMA_06G061200	GLYMA_07G205200	GLYMA_10G213000	GLYMA_16G162600	GLYMA_04G109900	GLYMA_13G358600		GLYMA_18G057200		GLYMA_13G243800
GLYMA_13G130600	GLYMA_18G251100	GLYMA_13G208300	GLYMA_11G219400	GLYMA_03G132700	GLYMA_12G149500	GLYMA_11G037300	GLYMA_19G013000	GLYMA_18G285100	GLYMA_07G126600		GLYMA_13G130600		GLYMA_19G226000
GLYMA_10G241700	GLYMA_09G184000	GLYMA_10G230200	GLYMA_18G274200	GLYMA_20G197700	GLYMA_15G211700	GLYMA_11G056600	GLYMA_19G005400	GLYMA_05G160200	GLYMA_13G191900		GLYMA_10G241700		GLYMA_12G152100
GLYMA_09G228000	GLYMA_14G055900	GLYMA_07G250600	GLYMA_04G100200	GLYMA_08G188600	GLYMA_07G220300	GLYMA_02G107400	GLYMA_19G240800	GLYMA_07G100800	GLYMA_18G127700		GLYMA_09G228000		GLYMA_03G139500
GLYMA_09G214200	GLYMA_04G010600	GLYMA_05G055300	GLYMA_03G261800	GLYMA_09G013800	GLYMA_10G230200	GLYMA_09G150300	GLYMA_02G153900	GLYMA_11G037300	GLYMA_12G019500		GLYMA_09G214200		GLYMA_19G167200
[truncated: 8,475 more rows]

## Sheet: Saskatoon_up
Supplementary Table 1: Top-down analysis of up- and downregulated genes in each line-location. Individual line-location DE genes are listed (1-10) with their location identifiers: Brandon (B), Morden (M), Saskatoon (S). All unique gene IDs are listed as well as the commonly up/down-regulated genes within each location. Commonly DE genes across all 10 lines from each location were used for crossco…
[truncated: 10,813 more rows]

[truncated: 7 more sheets: Meta_Up, UP_GO_Soybase, Morden_down, Brandon_down, Saskatoon_down, Meta_Down, Down_GO_Soybase]
